# Supplementary material for: Identification and expression pattern analysis of miRNAs in pectoral muscle during pigeon (Columba livia) development
Source: PeerJ. 2021 Jun 23;9:e11438. doi: 10.7717/peerj.11438 (PMC8234919; doi:10.7717/peerj.11438)
Supplement: Supplemental Information 3 [file peerj-09-11438-s003.xlsx]

## Sheet: Sheet1
Table S2. Sequencing data overview.
Mapping statistics	1d_1	1d_2	1d_3	28d_1	28d_2	28d_3	2yr_1	2yr_2	2yr_3
Total_raw	14484644	14224954	13752405	14746626	14389175	14511877	14098338	12501454	13279312
Total_clean	12373688	11773358	13225641	13532372	13846946	13673126	13697303	11902490	12854910
Mapped	8237820	7896966	9861193	8301826	8759597	8355610	11097681	8931126	9471239
Unmapped	4135868	3876392	3364448	5230546	5087349	5317516	2599622	2971364	3383671
Mapped (%)	66.5753	67.0749	74.5612	61.3479	63.2601	61.1097	81.0209	75.0358	73.678
Unmapped (%)	33.4247	32.9251	25.4388	38.6521	36.7399	38.8903	18.9791	24.9642	26.322
