# Supplementary material for: Identification and expression pattern analysis of miRNAs in pectoral muscle during pigeon (Columba livia) development
Source: PeerJ. 2021 Jun 23;9:e11438. doi: 10.7717/peerj.11438 (PMC8234919; doi:10.7717/peerj.11438)
Supplement: Supplemental Information 4 [file peerj-09-11438-s004.xlsx]

## Sheet: Sheet1
Table S3. Known miRNA group identified in this study.
ID	miR Name	Pre-miRNA sequence									Sequence of mature miRNAs									Expression of mature miRNAs (Read Counts)									Expression of mature miRNAs (RPM)
	miR Name	1d_1	1d_2	1d_3	28d_1	28d_2	28d_3	2yr_1	2yr_2	2yr_3	1d_1	1d_2	1d_3	28d_1	28d_2	28d_3	2yr_1	2yr_2	2yr_3	1d_1	1d_2	1d_3	28d_1	28d_2	28d_3	2y_1	2y_2	2y_3	1d_1	1d_2	1d_3	28d_1	28d_2	28d_3	2yr_1	2yr_2	2yr_3
1	cli-let-7a-3p	ugagguaguagguuguauaguuuuagggcucugcccugccugucacauaacuauacaaucuacugucuuucc	ugagguaguagguuguauaguuuuagggcucugcccugccugucacauaacuauacaaucuacugucuuucc	ugagguaguagguuguauaguuuuagggcucugcccugccugucacauaacuauacaaucuacugucuuucc	ugagguaguagguuguauaguuuuagggcucugcccugccugucacauaacuauacaaucuacugucuuucc	ugagguaguagguuguauaguuuuagggcucugcccugccugucacauaacuauacaaucuacugucuuucc	ugagguaguagguuguauaguuuuagggcucugcccugccugucacauaacuauacaaucuacugucuuucc	ugagguaguagguuguauaguuuuagggcucugcccugccugucacauaacuauacaaucuacugucuuucc	ugagguaguagguuguauaguuuuagggcucugcccugccugucacauaacuauacaaucuacugucuuucc	ugagguaguagguuguauaguuuuagggcucugcccugccugucacauaacuauacaaucuacugucuuucc	cuauacaaucuacugucuuucc	cuauacaaucuacugucuuucc	cuauacaaucuacugucuuucc	cuauacaaucuacugucuuucc	cuauacaaucuacugucuuucc	cuauacaaucuacugucuuucc	cuauacaaucuacugucuuucc	cuauacaaucuacugucuuucc	cuauacaaucuacugucuuucc	901	639	559	531	2027	710	470	382	375	109.374	80.9172	56.6869	63.9618	242.592	81.054	49.6239	42.7718	33.7908
2	cli-let-7a-5p	ugagguaguagguuguauaguuuuagggcucugcccugccugucacauaacuauacaaucuacugucuuucc	ugagguaguagguuguauaguuuuagggcucugcccugccugucacauaacuauacaaucuacugucuuucc	ugagguaguagguuguauaguuuuagggcucugcccugccugucacauaacuauacaaucuacugucuuucc	ugagguaguagguuguauaguuuuagggcucugcccugccugucacauaacuauacaaucuacugucuuucc	ugagguaguagguuguauaguuuuagggcucugcccugccugucacauaacuauacaaucuacugucuuucc	ugagguaguagguuguauaguuuuagggcucugcccugccugucacauaacuauacaaucuacugucuuucc	ugagguaguagguuguauaguuuuagggcucugcccugccugucacauaacuauacaaucuacugucuuucc	ugagguaguagguuguauaguuuuagggcucugcccugccugucacauaacuauacaaucuacugucuuucc	ugagguaguagguuguauaguuuuagggcucugcccugccugucacauaacuauacaaucuacugucuuucc	ugagguaguagguuguauaguu	ugagguaguagguuguauaguu	ugagguaguagguuguauaguu	ugagguaguagguuguauaguu	ugagguaguagguuguauaguu	ugagguaguagguuguauaguu	ugagguaguagguuguauaguu	ugagguaguagguuguauaguu	ugagguaguagguuguauaguu	38014	16140	24282	31172	122323	48361	30458	24928	26094	4614.57	2043.82	2462.38	3754.84	14639.6	5520.92	3215.84	2791.14	2351.3
3	cli-let-7c-3p	ugagguaguagguuguaugguuuagaguuacacccugggaguuaacuguacaaccuucuagcuuucc	ugagguaguagguuguaugguuuagaguuacacccugggaguuaacuguacaaccuucuagcuuucc	ugagguaguagguuguaugguuuagaguuacacccugggaguuaacuguacaaccuucuagcuuucc	ugagguaguagguuguaugguuuagaguuacacccugggaguuaacuguacaaccuucuagcuuucc	ugagguaguagguuguaugguuuagaguuacacccugggaguuaacuguacaaccuucuagcuuucc	ugagguaguagguuguaugguuuagaguuacacccugggaguuaacuguacaaccuucuagcuuucc	ugagguaguagguuguaugguuuagaguuacacccugggaguuaacuguacaaccuucuagcuuucc	ugagguaguagguuguaugguuuagaguuacacccugggaguuaacuguacaaccuucuagcuuucc	ugagguaguagguuguaugguuuagaguuacacccugggaguuaacuguacaaccuucuagcuuucc	cuguacaaccuucuagcuuucc	cuguacaaccuucuagcuuucc	cuguacaaccuucuagcuuucc	cuguacaaccuucuagcuuucc	cuguacaaccuucuagcuuucc	cuguacaaccuucuagcuuucc	cuguacaaccuucuagcuuucc	cuguacaaccuucuagcuuucc	cuguacaaccuucuagcuuucc	115	66	70	19	28	15	8	11	16	13.96	8.35764	7.09853	2.28865	3.35104	1.71241	0.844662	1.23165	1.44174
4	cli-let-7c-5p	ugagguaguagguuguaugguuuagaguuacacccugggaguuaacuguacaaccuucuagcuuucc	ugagguaguagguuguaugguuuagaguuacacccugggaguuaacuguacaaccuucuagcuuucc	ugagguaguagguuguaugguuuagaguuacacccugggaguuaacuguacaaccuucuagcuuucc	ugagguaguagguuguaugguuuagaguuacacccugggaguuaacuguacaaccuucuagcuuucc	ugagguaguagguuguaugguuuagaguuacacccugggaguuaacuguacaaccuucuagcuuucc	ugagguaguagguuguaugguuuagaguuacacccugggaguuaacuguacaaccuucuagcuuucc	ugagguaguagguuguaugguuuagaguuacacccugggaguuaacuguacaaccuucuagcuuucc	ugagguaguagguuguaugguuuagaguuacacccugggaguuaacuguacaaccuucuagcuuucc	ugagguaguagguuguaugguuuagaguuacacccugggaguuaacuguacaaccuucuagcuuucc	ugagguaguagguuguaugguu	ugagguaguagguuguaugguu	ugagguaguagguuguaugguu	ugagguaguagguuguaugguu	ugagguaguagguuguaugguu	ugagguaguagguuguaugguu	ugagguaguagguuguaugguu	ugagguaguagguuguaugguu	ugagguaguagguuguaugguu	13196	5051	6949	2815	14776	6384	3268	3015	2959	1601.88	639.613	704.681	339.082	1768.39	728.801	345.045	337.583	266.632
5	cli-let-7d-3p	agagguaguagguugcauaguuuuagggcagggauuuugcucacaaggagguaacuauacaaccugcugccuuucu	agagguaguagguugcauaguuuuagggcagggauuuugcucacaaggagguaacuauacaaccugcugccuuucu	agagguaguagguugcauaguuuuagggcagggauuuugcucacaaggagguaacuauacaaccugcugccuuucu	agagguaguagguugcauaguuuuagggcagggauuuugcucacaaggagguaacuauacaaccugcugccuuucu	agagguaguagguugcauaguuuuagggcagggauuuugcucacaaggagguaacuauacaaccugcugccuuucu	agagguaguagguugcauaguuuuagggcagggauuuugcucacaaggagguaacuauacaaccugcugccuuucu	agagguaguagguugcauaguuuuagggcagggauuuugcucacaaggagguaacuauacaaccugcugccuuucu	agagguaguagguugcauaguuuuagggcagggauuuugcucacaaggagguaacuauacaaccugcugccuuucu	agagguaguagguugcauaguuuuagggcagggauuuugcucacaaggagguaacuauacaaccugcugccuuucu	cuauacaaccugcugccuuucu	cuauacaaccugcugccuuucu	cuauacaaccugcugccuuucu	cuauacaaccugcugccuuucu	cuauacaaccugcugccuuucu	cuauacaaccugcugccuuucu	cuauacaaccugcugccuuucu	cuauacaaccugcugccuuucu	cuauacaaccugcugccuuucu	289	254	202	79	142	118	105	116	114	35.0821	32.1643	20.4843	9.51598	16.9946	13.4709	11.0862	12.9883	10.2724
6	cli-let-7d-5p	agagguaguagguugcauaguuuuagggcagggauuuugcucacaaggagguaacuauacaaccugcugccuuucu	agagguaguagguugcauaguuuuagggcagggauuuugcucacaaggagguaacuauacaaccugcugccuuucu	agagguaguagguugcauaguuuuagggcagggauuuugcucacaaggagguaacuauacaaccugcugccuuucu	agagguaguagguugcauaguuuuagggcagggauuuugcucacaaggagguaacuauacaaccugcugccuuucu	agagguaguagguugcauaguuuuagggcagggauuuugcucacaaggagguaacuauacaaccugcugccuuucu	agagguaguagguugcauaguuuuagggcagggauuuugcucacaaggagguaacuauacaaccugcugccuuucu	agagguaguagguugcauaguuuuagggcagggauuuugcucacaaggagguaacuauacaaccugcugccuuucu	agagguaguagguugcauaguuuuagggcagggauuuugcucacaaggagguaacuauacaaccugcugccuuucu	agagguaguagguugcauaguuuuagggcagggauuuugcucacaaggagguaacuauacaaccugcugccuuucu	agagguaguagguugcauaguu	agagguaguagguugcauaguu	agagguaguagguugcauaguu	agagguaguagguugcauaguu	agagguaguagguugcauaguu	agagguaguagguugcauaguu	agagguaguagguugcauaguu	agagguaguagguugcauaguu	agagguaguagguugcauaguu	4575	1989	2883	1218	8837	4275	2200	2545	2584	555.365	251.869	292.358	146.715	1057.61	488.036	232.282	284.958	232.841
7	cli-let-7e-3p	ugagguaguagauugaauaguuguggaguccgauccucccuuugagcaaacuauacaaucuacugucuuucc	ugagguaguagauugaauaguuguggaguccgauccucccuuugagcaaacuauacaaucuacugucuuucc	ugagguaguagauugaauaguuguggaguccgauccucccuuugagcaaacuauacaaucuacugucuuucc	ugagguaguagauugaauaguuguggaguccgauccucccuuugagcaaacuauacaaucuacugucuuucc	ugagguaguagauugaauaguuguggaguccgauccucccuuugagcaaacuauacaaucuacugucuuucc	ugagguaguagauugaauaguuguggaguccgauccucccuuugagcaaacuauacaaucuacugucuuucc	ugagguaguagauugaauaguuguggaguccgauccucccuuugagcaaacuauacaaucuacugucuuucc	ugagguaguagauugaauaguuguggaguccgauccucccuuugagcaaacuauacaaucuacugucuuucc	ugagguaguagauugaauaguuguggaguccgauccucccuuugagcaaacuauacaaucuacugucuuucc	cuauacaaucuacugucuuucc	cuauacaaucuacugucuuucc	cuauacaaucuacugucuuucc	cuauacaaucuacugucuuucc	cuauacaaucuacugucuuucc	cuauacaaucuacugucuuucc	cuauacaaucuacugucuuucc	cuauacaaucuacugucuuucc	cuauacaaucuacugucuuucc	900	637	556	526	2021	707	469	382	374	109.252	80.6639	56.3826	63.3596	241.873	80.7115	49.5183	42.7718	33.7007
8	cli-let-7e-5p	ugagguaguagauugaauaguuguggaguccgauccucccuuugagcaaacuauacaaucuacugucuuucc	ugagguaguagauugaauaguuguggaguccgauccucccuuugagcaaacuauacaaucuacugucuuucc	ugagguaguagauugaauaguuguggaguccgauccucccuuugagcaaacuauacaaucuacugucuuucc	ugagguaguagauugaauaguuguggaguccgauccucccuuugagcaaacuauacaaucuacugucuuucc	ugagguaguagauugaauaguuguggaguccgauccucccuuugagcaaacuauacaaucuacugucuuucc	ugagguaguagauugaauaguuguggaguccgauccucccuuugagcaaacuauacaaucuacugucuuucc	ugagguaguagauugaauaguuguggaguccgauccucccuuugagcaaacuauacaaucuacugucuuucc	ugagguaguagauugaauaguuguggaguccgauccucccuuugagcaaacuauacaaucuacugucuuucc	ugagguaguagauugaauaguuguggaguccgauccucccuuugagcaaacuauacaaucuacugucuuucc	ugagguaguagauugaauaguu	ugagguaguagauugaauaguu	ugagguaguagauugaauaguu	ugagguaguagauugaauaguu	ugagguaguagauugaauaguu	ugagguaguagauugaauaguu	ugagguaguagauugaauaguu	ugagguaguagauugaauaguu	ugagguaguagauugaauaguu	15111	5021	8483	7640	35710	12434	6323	4884	6569	1834.34	635.814	860.241	920.279	4273.78	1419.47	667.6	546.852	591.925
9	cli-let-7f-3p	ugagguaguagauuguauaguuguaggguaguuauuuuacccuguucaggagauaacuauacaaucuauugccuuccc	ugagguaguagauuguauaguuguaggguaguuauuuuacccuguucaggagauaacuauacaaucuauugccuuccc	ugagguaguagauuguauaguuguaggguaguuauuuuacccuguucaggagauaacuauacaaucuauugccuuccc	ugagguaguagauuguauaguuguaggguaguuauuuuacccuguucaggagauaacuauacaaucuauugccuuccc	ugagguaguagauuguauaguuguaggguaguuauuuuacccuguucaggagauaacuauacaaucuauugccuuccc	ugagguaguagauuguauaguuguaggguaguuauuuuacccuguucaggagauaacuauacaaucuauugccuuccc	ugagguaguagauuguauaguuguaggguaguuauuuuacccuguucaggagauaacuauacaaucuauugccuuccc	ugagguaguagauuguauaguuguaggguaguuauuuuacccuguucaggagauaacuauacaaucuauugccuuccc	ugagguaguagauuguauaguuguaggguaguuauuuuacccuguucaggagauaacuauacaaucuauugccuuccc	cuauacaaucuauugccuuccc	cuauacaaucuauugccuuccc	cuauacaaucuauugccuuccc	cuauacaaucuauugccuuccc	cuauacaaucuauugccuuccc	cuauacaaucuauugccuuccc	cuauacaaucuauugccuuccc	cuauacaaucuauugccuuccc	cuauacaaucuauugccuuccc	173	101	82	56	80	51	40	36	34	21.0007	12.7897	8.31542	6.7455	9.57441	5.82219	4.22331	4.03085	3.0637
10	cli-let-7f-5p	ugagguaguagauuguauaguuguaggguaguuauuuuacccuguucaggagauaacuauacaaucuauugccuuccc	ugagguaguagauuguauaguuguaggguaguuauuuuacccuguucaggagauaacuauacaaucuauugccuuccc	ugagguaguagauuguauaguuguaggguaguuauuuuacccuguucaggagauaacuauacaaucuauugccuuccc	ugagguaguagauuguauaguuguaggguaguuauuuuacccuguucaggagauaacuauacaaucuauugccuuccc	ugagguaguagauuguauaguuguaggguaguuauuuuacccuguucaggagauaacuauacaaucuauugccuuccc	ugagguaguagauuguauaguuguaggguaguuauuuuacccuguucaggagauaacuauacaaucuauugccuuccc	ugagguaguagauuguauaguuguaggguaguuauuuuacccuguucaggagauaacuauacaaucuauugccuuccc	ugagguaguagauuguauaguuguaggguaguuauuuuacccuguucaggagauaacuauacaaucuauugccuuccc	ugagguaguagauuguauaguuguaggguaguuauuuuacccuguucaggagauaacuauacaaucuauugccuuccc	ugagguaguagauuguauaguu	ugagguaguagauuguauaguu	ugagguaguagauuguauaguu	ugagguaguagauuguauaguu	ugagguaguagauuguauaguu	ugagguaguagauuguauaguu	ugagguaguagauuguauaguu	ugagguaguagauuguauaguug	ugagguaguagauuguauaguu	171	135	340	134	433	1763	602	101	797	20.7579	17.0952	34.4786	16.141	51.8215	201.265	63.5608	11.3088	71.8168
11	cli-let-7g-3p	ugagguaguaguuuguacaguuugagggucuaugauaccacccgguacaggagauaacuguacaggccacugccuugcc	ugagguaguaguuuguacaguuugagggucuaugauaccacccgguacaggagauaacuguacaggccacugccuugcc	ugagguaguaguuuguacaguuugagggucuaugauaccacccgguacaggagauaacuguacaggccacugccuugcc	ugagguaguaguuuguacaguuugagggucuaugauaccacccgguacaggagauaacuguacaggccacugccuugcc	ugagguaguaguuuguacaguuugagggucuaugauaccacccgguacaggagauaacuguacaggccacugccuugcc	ugagguaguaguuuguacaguuugagggucuaugauaccacccgguacaggagauaacuguacaggccacugccuugcc	ugagguaguaguuuguacaguuugagggucuaugauaccacccgguacaggagauaacuguacaggccacugccuugcc	ugagguaguaguuuguacaguuugagggucuaugauaccacccgguacaggagauaacuguacaggccacugccuugcc	ugagguaguaguuuguacaguuugagggucuaugauaccacccgguacaggagauaacuguacaggccacugccuugcc	cuguacaggccacugccuugcc	cuguacaggccacugccuugcc	cuguacaggccacugccuugcc	cuguacaggccacugccuugcc	cuguacaggccacugccuugcc	cuguacaggccacugccuugcc	cuguacaggccacugccuugcc	cuguacaggccacugccuugcc	cuguacaggccacugccuugcc	147	89	108	79	75	54	28	41	30	17.8445	11.2702	10.952	9.51598	8.97601	6.16467	2.95632	4.59069	2.70327
12	cli-let-7g-5p	ugagguaguaguuuguacaguuugagggucuaugauaccacccgguacaggagauaacuguacaggccacugccuugcc	ugagguaguaguuuguacaguuugagggucuaugauaccacccgguacaggagauaacuguacaggccacugccuugcc	ugagguaguaguuuguacaguuugagggucuaugauaccacccgguacaggagauaacuguacaggccacugccuugcc	ugagguaguaguuuguacaguuugagggucuaugauaccacccgguacaggagauaacuguacaggccacugccuugcc	ugagguaguaguuuguacaguuugagggucuaugauaccacccgguacaggagauaacuguacaggccacugccuugcc	ugagguaguaguuuguacaguuugagggucuaugauaccacccgguacaggagauaacuguacaggccacugccuugcc	ugagguaguaguuuguacaguuugagggucuaugauaccacccgguacaggagauaacuguacaggccacugccuugcc	ugagguaguaguuuguacaguuugagggucuaugauaccacccgguacaggagauaacuguacaggccacugccuugcc	ugagguaguaguuuguacaguuugagggucuaugauaccacccgguacaggagauaacuguacaggccacugccuugcc	ugagguaguaguuuguacaguu	ugagguaguaguuuguacaguu	ugagguaguaguuuguacaguu	ugagguaguaguuuguacaguu	ugagguaguaguuuguacaguu	ugagguaguaguuuguacaguu	ugagguaguaguuuguacaguu	ugagguaguaguuuguacaguu	ugagguaguaguuuguacaguu	25095	13247	19317	12324	19295	12773	7453	6591	6992	3046.32	1677.48	1958.89	1484.49	2309.23	1458.17	786.909	737.981	630.042
13	cli-let-7i-3p	ugagguaguaguuugugcuguuggucggguugugacauugcccgcuguggagauaacugcgcaagcuacugccuugcu	ugagguaguaguuugugcuguuggucggguugugacauugcccgcuguggagauaacugcgcaagcuacugccuugcu	ugagguaguaguuugugcuguuggucggguugugacauugcccgcuguggagauaacugcgcaagcuacugccuugcu	ugagguaguaguuugugcuguuggucggguugugacauugcccgcuguggagauaacugcgcaagcuacugccuugcu	ugagguaguaguuugugcuguuggucggguugugacauugcccgcuguggagauaacugcgcaagcuacugccuugcu	ugagguaguaguuugugcuguuggucggguugugacauugcccgcuguggagauaacugcgcaagcuacugccuugcu	ugagguaguaguuugugcuguuggucggguugugacauugcccgcuguggagauaacugcgcaagcuacugccuugcu	ugagguaguaguuugugcuguuggucggguugugacauugcccgcuguggagauaacugcgcaagcuacugccuugc	ugagguaguaguuugugcuguuggucggguugugacauugcccgcuguggagauaacugcgcaagcuacugccuugc	cugcgcaagcuacugccuugcu	cugcgcaagcuacugccuugcu	cugcgcaagcuacugccuugcu	cugcgcaagcuacugccuugcu	cugcgcaagcuacugccuugcu	cugcgcaagcuacugccuugcu	cugcgcaagcuacugccuugcu	cugcgcaagcuacugccuugc	cugcgcaagcuacugccuugc	84	65	79	94	136	134	42	67	46	10.1969	8.23101	8.0112	11.3228	16.2765	15.2975	4.43448	7.50185	4.14501
14	cli-let-7i-5p	ugagguaguaguuugugcuguuggucggguugugacauugcccgcuguggagauaacugcgcaagcuacugccuugcu	ugagguaguaguuugugcuguuggucggguugugacauugcccgcuguggagauaacugcgcaagcuacugccuugcu	ugagguaguaguuugugcuguuggucggguugugacauugcccgcuguggagauaacugcgcaagcuacugccuugcu	ugagguaguaguuugugcuguuggucggguugugacauugcccgcuguggagauaacugcgcaagcuacugccuugcu	ugagguaguaguuugugcuguuggucggguugugacauugcccgcuguggagauaacugcgcaagcuacugccuugcu	ugagguaguaguuugugcuguuggucggguugugacauugcccgcuguggagauaacugcgcaagcuacugccuugcu	ugagguaguaguuugugcuguuggucggguugugacauugcccgcuguggagauaacugcgcaagcuacugccuugcu	ugagguaguaguuugugcuguuggucggguugugacauugcccgcuguggagauaacugcgcaagcuacugccuugc	ugagguaguaguuugugcuguuggucggguugugacauugcccgcuguggagauaacugcgcaagcuacugccuugc	ugagguaguaguuugugcuguu	ugagguaguaguuugugcuguu	ugagguaguaguuugugcuguu	ugagguaguaguuugugcuguu	ugagguaguaguuugugcuguu	ugagguaguaguuugugcuguu	ugagguaguaguuugugcuguu	ugagguaguaguuugugcuguu	ugagguaguaguuugugcuguu	34262	15993	20700	10718	27205	9425	4316	2842	6005	4159.11	2025.21	2099.14	1291.04	3255.9	1075.96	455.695	318.213	541.104
15	cli-miR-100-3p	aacccguagauccgaacuuguggucauauuccacacaagcuuguaucuauagguaug	aacccguagauccgaacuuguggucauauuccacacaagcuuguaucuauagguaug	aacccguagauccgaacuuguggucauauuccacacaagcuuguaucuauagguaug	aacccguagauccgaacuuguggucauauuccacacaagcuuguaucuauagguaug	aacccguagauccgaacuuguggucauauuccacacaagcuuguaucuauagguaug	aacccguagauccgaacuuguggucauauuccacacaagcuuguaucuauagguaug	aacccguagauccgaacuuguggucauauuccacacaagcuuguaucuauagguaug	aacccguagauccgaacuuguggucauauuccacacaagcuuguaucuauagguaug	aacccguagauccgaacuuguggucauauuccacacaagcuuguaucuauagguaug	caagcuuguaucuauagguaug	caagcuuguaucuauagguaug	caagcuuguaucuauagguaug	caagcuuguaucuauagguaug	caagcuuguaucuauagguaug	caagcuuguaucuauagguaug	caagcuuguaucuauagguaug	caagcuuguaucuauagguaug	caagcuuguaucuauagguaug	335	162	169	25	30	29	14	10	3	40.6661	20.5142	17.1379	3.01139	3.5904	3.31065	1.47816	1.11968	0.270327
16	cli-miR-100-5p	aacccguagauccgaacuuguggucauauuccacacaagcuuguaucuauagguaug	aacccguagauccgaacuuguggucauauuccacacaagcuuguaucuauagguaug	aacccguagauccgaacuuguggucauauuccacacaagcuuguaucuauagguaug	aacccguagauccgaacuuguggucauauuccacacaagcuuguaucuauagguaug	aacccguagauccgaacuuguggucauauuccacacaagcuuguaucuauagguaug	aacccguagauccgaacuuguggucauauuccacacaagcuuguaucuauagguaug	aacccguagauccgaacuuguggucauauuccacacaagcuuguaucuauagguaug	aacccguagauccgaacuuguggucauauuccacacaagcuuguaucuauagguaug	aacccguagauccgaacuuguggucauauuccacacaagcuuguaucuauagguaug	aacccguagauccgaacuugug	aacccguagauccgaacuugug	aacccguagauccgaacuugug	aacccguagauccgaacuugug	aacccguagauccgaacuugug	aacccguagauccgaacuugug	aacccguagauccgaacuugug	aacccguagauccgaacuugug	aacccguagauccgaacuugug	24187	21573	24033	10947	13508	10459	9153	8884	8746	2936.09	2731.81	2437.13	1318.63	1616.64	1194	966.399	994.723	788.093
17	cli-miR-101-3p	ucgguuaucaugguaccggugcuguauacgugaaagguacaguacugugauaacuga	ucgguuaucaugguaccggugcuguauacgugaaagguacaguacugugauaacuga	ucgguuaucaugguaccggugcuguauacgugaaagguacaguacugugauaacuga	ucgguuaucaugguaccggugcuguauacgugaaagguacaguacugugauaacuga	cgguuaucaugguaccggugcuguauacgugaaagguacaguacugugauaacuga	ucgguuaucaugguaccggugcuguauacgugaaagguacaguacugugauaacuga	ucgguuaucaugguaccggugcuguauacgugaaagguacaguacugugauaacuga	ucgguuaucaugguaccggugcuguauacgugaaagguacaguacugugauaacuga	gguuaucaugguaccggugcuguauacgugaaagguacaguacugugauaacuga	guacaguacugugauaacuga	guacaguacugugauaacuga	guacaguacugugauaacuga	guacaguacugugauaacuga	guacaguacugugauaacuga	guacaguacugugauaacuga	guacaguacugugauaacuga	guacaguacugugauaacuga	guacaguacugugauaacuga	34718	23989	27981	27804	32478	26851	39125	45523	30337	4214.46	3037.75	2837.49	3349.14	3886.97	3065.32	4130.93	5097.12	2733.63
18	cli-miR-101-5p	ucgguuaucaugguaccggugcuguauacgugaaagguacaguacugugauaacuga	ucgguuaucaugguaccggugcuguauacgugaaagguacaguacugugauaacuga	ucgguuaucaugguaccggugcuguauacgugaaagguacaguacugugauaacuga	ucgguuaucaugguaccggugcuguauacgugaaagguacaguacugugauaacuga	cgguuaucaugguaccggugcuguauacgugaaagguacaguacugugauaacuga	ucgguuaucaugguaccggugcuguauacgugaaagguacaguacugugauaacuga	ucgguuaucaugguaccggugcuguauacgugaaagguacaguacugugauaacuga	ucgguuaucaugguaccggugcuguauacgugaaagguacaguacugugauaacuga	gguuaucaugguaccggugcuguauacgugaaagguacaguacugugauaacuga	ucgguuaucaugguaccggugcu	ucgguuaucaugguaccggugcu	ucgguuaucaugguaccggugcu	ucgguuaucaugguaccggugcu	cgguuaucaugguaccggugcugu	ucgguuaucaugguaccggugcu	ucgguuaucaugguaccggugcu	ucgguuaucaugguaccggugcu	gguuaucaugguaccggugcug	12	11	12	2	2	4	3	3	0	1.4567	1.39294	1.21689	0.240911	0.23936	0.456642	0.316748	0.335904	0
19	cli-miR-103-3p	agcuucuuuacagugcugccuuguugcguucaugucaagcagcauuguacagggcuauga	agcuucuuuacagugcugccuuguugcguucaugucaagcagcauuguacagggcuauga	agcuucuuuacagugcugccuuguugcguucaugucaagcagcauuguacagggcuauga	agcuucuuuacagugcugccuuguugcguucaugucaagcagcauuguacagggcuauga	agcuucuuuacagugcugccuuguugcguucaugucaagcagcauuguacagggcuauga	agcuucuuuacagugcugccuuguugcguucaugucaagcagcauuguacagggcuauga	agcuucuuuacagugcugccuuguugcguucaugucaagcagcauuguacagggcuauga	agcuucuuuacagugcugccuuguugcguucaugucaagcagcauuguacagggcuauga	agcuucuuuacagugcugccuuguugcguucaugucaagcagcauuguacagggcuauga	agcagcauuguacagggcuauga	agcagcauuguacagggcuauga	agcagcauuguacagggcuauga	agcagcauuguacagggcuauga	agcagcauuguacagggcuauga	agcagcauuguacagggcuauga	agcagcauuguacagggcuauga	agcagcauuguacagggcuauga	agcagcauuguacagggcuauga	13270	8206	15169	5576	8312	7107	2511	1796	1921	1610.86	1039.13	1538.25	671.659	994.781	811.339	265.118	201.094	173.099
20	cli-miR-103-5p	agcuucuuuacagugcugccuuguugcguucaugucaagcagcauuguacagggcuauga	agcuucuuuacagugcugccuuguugcguucaugucaagcagcauuguacagggcuauga	agcuucuuuacagugcugccuuguugcguucaugucaagcagcauuguacagggcuauga	agcuucuuuacagugcugccuuguugcguucaugucaagcagcauuguacagggcuauga	agcuucuuuacagugcugccuuguugcguucaugucaagcagcauuguacagggcuauga	agcuucuuuacagugcugccuuguugcguucaugucaagcagcauuguacagggcuauga	agcuucuuuacagugcugccuuguugcguucaugucaagcagcauuguacagggcuauga	agcuucuuuacagugcugccuuguugcguucaugucaagcagcauuguacagggcuauga	agcuucuuuacagugcugccuuguugcguucaugucaagcagcauuguacagggcuauga	agcuucuuuacagugcugccuugu	agcuucuuuacagugcugccuug	agcuucuuuacagugcugccuugu	agcuucuuuacagugcugccuug	agcuucuuuacagugcugccuug	agcuucuuuacagugcugccuugu	agcuucuuuacagugcugccuug	agcuucuuuacagugcugccuug	agcuucuuuacagugcugccuug	3	3	2	0	7	4	0	0	0	0.364174	0.379893	0.202815	0	0.83776	0.456642	0	0	0
21	cli-miR-106-3p	aaaagugcuuacagugcagguagaguuuaggaucuacugcaguauaagcacuucuggc	aaaagugcuuacagugcagguagaguuuaggaucuacugcaguauaagcacuucuggc	aaaagugcuuacagugcagguagaguuuaggaucuacugcaguauaagcacuucuggc	aaaagugcuuacagugcagguagaguuuaggaucuacugcaguauaagcacuucuggc	aaaagugcuuacagugcagguagaguuuaggaucuacugcaguauaagcacuucuggc	aaaagugcuuacagugcagguagaguuuaggaucuacugcaguauaagcacuucuggc	aaaagugcuuacagugcagguagaguuuaggaucuacugcaguauaagcacuucuggc	aaaagugcuuacagugcagguagaguuuaggaucuacugcaguauaagcacuucuggc	aaaagugcuuacagugcagguagaguuuaggaucuacugcaguauaagcacuucuggc	acugcaguauaagcacuucuggc	acugcaguauaagcacuucuggc	acugcaguauaagcacuucuggc	acugcaguauaagcacuucuggc	acugcaguauaagcacuucuggc	acugcaguauaagcacuucuggc	acugcaguauaagcacuucuggc	acugcaguauaagcacuucuggc	acugcaguauaagcacuucuggc	1487	697	1658	84	255	147	12	24	34	180.509	88.2617	168.134	10.1183	30.5184	16.7816	1.26699	2.68723	3.0637
22	cli-miR-106-5p	aaaagugcuuacagugcagguagaguuuaggaucuacugcaguauaagcacuucuggc	aaaagugcuuacagugcagguagaguuuaggaucuacugcaguauaagcacuucuggc	aaaagugcuuacagugcagguagaguuuaggaucuacugcaguauaagcacuucuggc	aaaagugcuuacagugcagguagaguuuaggaucuacugcaguauaagcacuucuggc	aaaagugcuuacagugcagguagaguuuaggaucuacugcaguauaagcacuucuggc	aaaagugcuuacagugcagguagaguuuaggaucuacugcaguauaagcacuucuggc	aaaagugcuuacagugcagguagaguuuaggaucuacugcaguauaagcacuucuggc	aaaagugcuuacagugcagguagaguuuaggaucuacugcaguauaagcacuucuggc	aaaagugcuuacagugcagguagaguuuaggaucuacugcaguauaagcacuucuggc	aaaagugcuuacagugcagguag	aaaagugcuuacagugcagguag	aaaagugcuuacagugcagguag	aaaagugcuuacagugcagguag	aaaagugcuuacagugcagguag	aaaagugcuuacagugcagguag	aaaagugcuuacagugcagguaga	aaaagugcuuacagugcagguaga	aaaagugcuuacagugcagguaga	2168	1384	3110	387	622	470	143	128	135	263.176	175.257	315.378	46.6163	74.441	53.6554	15.0983	14.3319	12.1647
23	cli-miR-107-3p	ucggcuucuuuacagugcugccuuguugcauauggaucaagcagcauuguacagggcuauga	ucggcuucuuuacagugcugccuuguugcauauggaucaagcagcauuguacagggcuauga	ucggcuucuuuacagugcugccuuguugcauauggaucaagcagcauuguacagggcuauga	ucggcuucuuuacagugcugccuuguugcauauggaucaagcagcauuguacagggcuauga	ucggcuucuuuacagugcugccuuguugcauauggaucaagcagcauuguacagggcuauga	ucggcuucuuuacagugcugccuuguugcauauggaucaagcagcauuguacagggcuauga	ucggcuucuuuacagugcugccuuguugcauauggaucaagcagcauuguacagggcuauga	ucggcuucuuuacagugcugccuuguugcauauggaucaagcagcauuguacagggcuauga	ucggcuucuuuacagugcugccuuguugcauauggaucaagcagcauuguacagggcuauga	agcagcauuguacagggcuauga	agcagcauuguacagggcuauga	agcagcauuguacagggcuauga	agcagcauuguacagggcuauga	agcagcauuguacagggcuauga	agcagcauuguacagggcuauga	agcagcauuguacagggcuauga	agcagcauuguacagggcuauga	agcagcauuguacagggcuauga	13234	8182	15127	5555	8275	7084	2499	1793	1909	1606.49	1036.09	1533.99	669.13	990.353	808.713	263.851	200.759	172.018
24	cli-miR-10a-3p	uacccuguagauccgaauuuguguaaaggaaguugggucacaaauucguaucuaggggaau	uacccuguagauccgaauuuguguaaaggaaguugggucacaaauucguaucuaggggaau	uacccuguagauccgaauuuguguaaaggaaguugggucacaaauucguaucuaggggaau	uacccuguagauccgaauuuguguaaaggaaguugggucacaaauucguaucuaggggaau	uacccuguagauccgaauuuguguaaaggaaguugggucacaaauucguaucuaggggaau	uacccuguagauccgaauuuguguaaaggaaguugggucacaaauucguaucuaggggaau	uacccuguagauccgaauuuguguaaaggaaguugggucacaaauucguaucuaggggaau	uacccuguagauccgaauuuguguaaaggaaguugggucacaaauucguaucuaggggaau	uacccuguagauccgaauuuguguaaaggaaguugggucacaaauucguaucuaggggaau	caaauucguaucuaggggaau	caaauucguaucuaggggaau	caaauucguaucuaggggaau	caaauucguaucuaggggaau	caaauucguaucuaggggaau	caaauucguaucuaggggaau	caaauucguaucuaggggaau	caaauucguaucuaggggaau	caaauucguaucuaggggaau	718	426	484	356	757	580	332	310	205	87.159	53.9448	49.0813	42.8821	90.5978	66.2131	35.0535	34.7101	18.4723
25	cli-miR-10a-5p	uacccuguagauccgaauuuguguaaaggaaguugggucacaaauucguaucuaggggaau	uacccuguagauccgaauuuguguaaaggaaguugggucacaaauucguaucuaggggaau	uacccuguagauccgaauuuguguaaaggaaguugggucacaaauucguaucuaggggaau	uacccuguagauccgaauuuguguaaaggaaguugggucacaaauucguaucuaggggaau	uacccuguagauccgaauuuguguaaaggaaguugggucacaaauucguaucuaggggaau	uacccuguagauccgaauuuguguaaaggaaguugggucacaaauucguaucuaggggaau	uacccuguagauccgaauuuguguaaaggaaguugggucacaaauucguaucuaggggaau	uacccuguagauccgaauuuguguaaaggaaguugggucacaaauucguaucuaggggaau	uacccuguagauccgaauuuguguaaaggaaguugggucacaaauucguaucuaggggaau	uacccuguagauccgaauuugu	uacccuguagauccgaauuugu	uacccuguagauccgaauuugu	uacccuguagauccgaauuugu	uacccuguagauccgaauuugu	uacccuguagauccgaauuugu	uacccuguagauccgaauuugu	uacccuguagauccgaauuugu	uacccuguagauccgaauuugu	178488	126086	191012	113394	162032	121930	83248	93141	79714	21666.9	15966.4	19370.1	13658.9	19392	13919.6	8789.56	10428.8	7182.94
26	cli-miR-10b-3p	uacccuguagaaccgaauuugugugauauucauauagucacagauucgauucuaggggaaua	uacccuguagaaccgaauuugugugauauucauauagucacagauucgauucuaggggaau	uacccuguagaaccgaauuugugugauauucauauagucacagauucgauucuaggggaau	uacccuguagaaccgaauuugugugauauucauauagucacagauucgauucuaggggaau	uacccuguagaaccgaauuugugugauauucauauagucacagauucgauucuaggggaau	uacccuguagaaccgaauuugugugauauucauauagucacagauucgauucuaggggaau	uacccuguagaaccgaauuugugugauauucauauagucacagauucgauucuaggggaau	uacccuguagaaccgaauuugugugauauucauauagucacagauucgauucuaggggaau	uacccuguagaaccgaauuugugugauauucauauagucacagauucgauucuaggggaau	agauucgauucuaggggaaua	acagauucgauucuaggggaau	agauucgauucuaggggaau	agauucgauucuaggggaau	agauucgauucuaggggaau	agauucgauucuaggggaau	agauucgauucuaggggaau	acagauucgauucuaggggaau	acagauucgauucuaggggaau	30	36	20	22	21	32	5	11	2	3.64174	4.55871	2.02815	2.65002	2.51328	3.65314	0.527914	1.23165	0.180218
27	cli-miR-10b-5p	uacccuguagaaccgaauuugugugauauucauauagucacagauucgauucuaggggaaua	uacccuguagaaccgaauuugugugauauucauauagucacagauucgauucuaggggaau	uacccuguagaaccgaauuugugugauauucauauagucacagauucgauucuaggggaau	uacccuguagaaccgaauuugugugauauucauauagucacagauucgauucuaggggaau	uacccuguagaaccgaauuugugugauauucauauagucacagauucgauucuaggggaau	uacccuguagaaccgaauuugugugauauucauauagucacagauucgauucuaggggaau	uacccuguagaaccgaauuugugugauauucauauagucacagauucgauucuaggggaau	uacccuguagaaccgaauuugugugauauucauauagucacagauucgauucuaggggaau	uacccuguagaaccgaauuugugugauauucauauagucacagauucgauucuaggggaau	uacccuguagaaccgaauuugu	uacccuguagaaccgaauuugu	uacccuguagaaccgaauuugu	uacccuguagaaccgaauuugu	uacccuguagaaccgaauuugu	uacccuguagaaccgaauuugu	uacccuguagaaccgaauuugu	uacccuguagaaccgaauuugu	uacccuguagaaccgaauuugu	97819	92564	102100	71147	89526	69190	25806	34795	31210	11874.4	11721.5	10353.7	8570.04	10714.5	7898.77	2724.67	3895.93	2812.3
28	cli-miR-124-3p	null	null	cguguucacagcggaccuugauuuaauguccauacaauuaaggcacgcggugaaugcca	guguucacagcggaccuugauuuaauguccauacaauuaaggcacgcggugaaugcca	cguguucacagcggaccuugauuuaauguccauacaauuaaggcacgcggugaaugccaa	cguguucacagcggaccuugauuuaauguccauacaauuaaggcacgcggugaaugcc	null	null	ggguucaccacagaccuugauuuagcgucacacaauuaaggcacgcggugaaugcca	null	null	uuaaggcacgcggugaaugcca	uaaggcacgcggugaaugcca	uaaggcacgcggugaaugccaa	uaaggcacgcggugaaugcc	null	null	uaaggcacgcggugaaugcca	0	0	6	3	6	3	0	0	66	0	0	0.608446	0.361366	0.71808	0.342482	0	0	5.94719
29	cli-miR-124-5p	null	null	cguguucacagcggaccuugauuuaauguccauacaauuaaggcacgcggugaaugcca	guguucacagcggaccuugauuuaauguccauacaauuaaggcacgcggugaaugcca	cguguucacagcggaccuugauuuaauguccauacaauuaaggcacgcggugaaugccaa	cguguucacagcggaccuugauuuaauguccauacaauuaaggcacgcggugaaugcc	null	null	ggguucaccacagaccuugauuuagcgucacacaauuaaggcacgcggugaaugcca	null	null	cguguucacagcggaccuugauu	guguucacagcggaccu	cguguucacagcggaccuugau	cguguucacagcggaccuuga	null	null	ggguucaccacagaccuugau	0	0	1	1	0	1	0	0	0	0	0	0.101408	0.120455	0	0.114161	0	0	0
30	cli-miR-125-3p	ucccugagacccuaacuugugagguuuuuuagcaacaaucacaagucaggcucuugggaccu	ucccugagacccuaacuugugagguuuuuuagcaacaaucacaagucaggcucuugggacc	ucccugagacccuaacuugugagguuuuuuagcaacaaucacaagucaggcucuugggaccu	ucccugagacccuaacuugugagguuuuuuagcaacaaucacaagucaggcucuugggaccu	ucccugagacccuaacuugugagguuuuuuagcaacaaucacaagucaggcucuugggaccu	ucccugagacccuaacuugugagguuuuuuagcaacaaucacaagucaggcucuugggaccu	ucccugagacccuaacuugugagguuuuuuagcaacaaucacaagucaggcucuugggaccu	ucccugagacccuaacuugugagguuuuuuagcaacaaucacaagucaggcucuugggaccu	ucccugagacccuaacuugugagguuuuuuagcaacaaucacaagucaggcucuugggaccu	acaagucaggcucuugggaccu	acaagucaggcucuugggacc	acaagucaggcucuugggaccu	acaagucaggcucuugggaccu	acaagucaggcucuugggaccu	acaagucaggcucuugggaccu	acaagucaggcucuugggaccu	acaagucaggcucuugggaccu	acaagucaggcucuugggaccu	2598	1600	1489	932	2364	1600	901	889	753	315.375	202.609	150.996	112.264	282.924	182.657	95.1301	99.5395	67.852
31	cli-miR-125-5p	ucccugagacccuaacuugugagguuuuuuagcaacaaucacaagucaggcucuugggaccu	ucccugagacccuaacuugugagguuuuuuagcaacaaucacaagucaggcucuugggacc	ucccugagacccuaacuugugagguuuuuuagcaacaaucacaagucaggcucuugggaccu	ucccugagacccuaacuugugagguuuuuuagcaacaaucacaagucaggcucuugggaccu	ucccugagacccuaacuugugagguuuuuuagcaacaaucacaagucaggcucuugggaccu	ucccugagacccuaacuugugagguuuuuuagcaacaaucacaagucaggcucuugggaccu	ucccugagacccuaacuugugagguuuuuuagcaacaaucacaagucaggcucuugggaccu	ucccugagacccuaacuugugagguuuuuuagcaacaaucacaagucaggcucuugggaccu	ucccugagacccuaacuugugagguuuuuuagcaacaaucacaagucaggcucuugggaccu	ucccugagacccuaacuuguga	ucccugagacccuaacuuguga	ucccugagacccuaacuuguga	ucccugagacccuaacuuguga	ucccugagacccuaacuuguga	ucccugagacccuaacuuguga	ucccugagacccuaacuuguga	ucccugagacccuaacuuguga	ucccugagacccuaacuuguga	87648	71800	99504	48644	58725	60020	43239	41517	40612	10639.7	9092.1	10090.5	5859.43	7028.21	6851.91	4565.29	4648.57	3659.5
32	cli-miR-126-3p	cauuauuacuuuugguacgcgcugugacacuucaaacucguaccgugaguaauaaugcg	cauuauuacuuuugguacgcgcugugacacuucaaacucguaccgugaguaauaaugcg	cauuauuacuuuugguacgcgcugugacacuucaaacucguaccgugaguaauaaugcg	cauuauuacuuuugguacgcgcugugacacuucaaacucguaccgugaguaauaaugcg	cauuauuacuuuugguacgcgcugugacacuucaaacucguaccgugaguaauaaugcg	cauuauuacuuuugguacgcgcugugacacuucaaacucguaccgugaguaauaaugcg	cauuauuacuuuugguacgcgcugugacacuucaaacucguaccgugaguaauaaugcg	cauuauuacuuuugguacgcgcugugacacuucaaacucguaccgugaguaauaaugcg	cauuauuacuuuugguacgcgcugugacacuucaaacucguaccgugaguaauaaugcg	ucguaccgugaguaauaaugcg	ucguaccgugaguaauaaugcg	ucguaccgugaguaauaaugcg	ucguaccgugaguaauaaugcg	ucguaccgugaguaauaaugcg	ucguaccgugaguaauaaugcg	ucguaccgugaguaauaaugcg	ucguaccgugaguaauaaugcg	ucguaccgugaguaauaaugcg	53805	42313	49355	227795	319034	354658	105358	73446	84874	6531.46	5358.13	5004.97	27439.1	38182	40487.9	11124	8223.6	7647.9
33	cli-miR-126-5p	cauuauuacuuuugguacgcgcugugacacuucaaacucguaccgugaguaauaaugcg	cauuauuacuuuugguacgcgcugugacacuucaaacucguaccgugaguaauaaugcg	cauuauuacuuuugguacgcgcugugacacuucaaacucguaccgugaguaauaaugcg	cauuauuacuuuugguacgcgcugugacacuucaaacucguaccgugaguaauaaugcg	cauuauuacuuuugguacgcgcugugacacuucaaacucguaccgugaguaauaaugcg	cauuauuacuuuugguacgcgcugugacacuucaaacucguaccgugaguaauaaugcg	cauuauuacuuuugguacgcgcugugacacuucaaacucguaccgugaguaauaaugcg	cauuauuacuuuugguacgcgcugugacacuucaaacucguaccgugaguaauaaugcg	cauuauuacuuuugguacgcgcugugacacuucaaacucguaccgugaguaauaaugcg	cauuauuacuuuugguacgcg	cauuauuacuuuugguacgcg	cauuauuacuuuugguacgcg	cauuauuacuuuugguacgcg	cauuauuacuuuugguacgcg	cauuauuacuuuugguacgcg	cauuauuacuuuugguacgcg	cauuauuacuuuugguacgcg	cauuauuacuuuugguacgcg	52838	38826	33613	35913	150798	53179	49101	42718	43729	6414.08	4916.57	3408.61	4325.92	18047.5	6070.94	5184.22	4783.05	3940.37
34	cli-miR-128-3p	cggggccguaacacugucugagagguuuacauuucucacagugaaccggucucuuu	cggggccguaacacugucugagagguuuacauuucucacagugaaccggucucuuu	cggggccguaacacugucugagagguuuacauuucucacagugaaccggucucuuu	cggggccguaacacugucugagagguuuacauuucucacagugaaccggucucuuu	cggggccguaacacugucugagagguuuacauuucucacagugaaccggucucuuu	cggggccguaacacugucugagagguuuacauuucucacagugaaccggucucuuu	cggggccguaacacugucugagagguuuacauuucucacagugaaccggucucuuu	cggggccguaacacugucugagagguuuacauuucucacagugaaccggucucuuu	cggggccguaacacugucugagagguuuacauuucucacagugaaccggucucuuu	ucacagugaaccggucucuuu	ucacagugaaccggucucuuu	ucacagugaaccggucucuuu	ucacagugaaccggucucuuu	ucacagugaaccggucucuuu	ucacagugaaccggucucuuu	ucacagugaaccggucucuuu	ucacagugaaccggucucuuu	ucacagugaaccggucucuuu	72916	44299	45893	11806	37219	21110	11735	10841	13593	8851.37	5609.62	4653.9	1422.1	4454.37	2409.93	1239.01	1213.84	1224.85
35	cli-miR-128-5p	cggggccguaacacugucugagagguuuacauuucucacagugaaccggucucuuu	cggggccguaacacugucugagagguuuacauuucucacagugaaccggucucuuu	cggggccguaacacugucugagagguuuacauuucucacagugaaccggucucuuu	cggggccguaacacugucugagagguuuacauuucucacagugaaccggucucuuu	cggggccguaacacugucugagagguuuacauuucucacagugaaccggucucuuu	cggggccguaacacugucugagagguuuacauuucucacagugaaccggucucuuu	cggggccguaacacugucugagagguuuacauuucucacagugaaccggucucuuu	cggggccguaacacugucugagagguuuacauuucucacagugaaccggucucuuu	cggggccguaacacugucugagagguuuacauuucucacagugaaccggucucuuu	cggggccguaacacugucugaga	cggggccguaacacugucugaga	cggggccguaacacugucugaga	cggggccguaacacugucugaga	cggggccguaacacugucugaga	cggggccguaacacugucugaga	cggggccguaacacugucugaga	cggggccguaacacugucugag	cggggccguaacacugucugaga	149	80	100	18	36	31	10	12	9	18.0873	10.1305	10.1408	2.1682	4.30848	3.53898	1.05583	1.34362	0.81098
36	cli-miR-1306-3p	ccaccuccccugcaaacguccagugacgcagagguaauggacguuggcucugguggugaugg	null	ccaccuccccugcaaacguccagugacgcagagguaauggacguuggcucugguggugaug	null	null	null	ccaccuccccugcaaacguccagugacgcagagguaauggacguuggcucugguggugaugg	null	null	acguuggcucugguggugaugg	null	gacguuggcucugguggugaug	null	null	null	acguuggcucugguggugaugg	null	null	13	0	5	0	0	0	1	0	0	1.57809	0	0.507038	0	0	0	0.105583	0	0
37	cli-miR-1306-5p	ccaccuccccugcaaacguccagugacgcagagguaauggacguuggcucugguggugaugg	null	ccaccuccccugcaaacguccagugacgcagagguaauggacguuggcucugguggugaug	null	null	null	ccaccuccccugcaaacguccagugacgcagagguaauggacguuggcucugguggugaugg	null	null	ccaccuccccugcaaacgucc	null	ccaccuccccugcaaacgucc	null	null	null	ccaccuccccugcaaacgucc	null	null	9	0	10	0	0	0	2	0	0	1.09252	0	1.01408	0	0	0	0.211166	0	0
38	cli-miR-130a-3p	gcccuuuuuauguuguacuacuggugaucaugcacaaaaagcagugcaauguuaaaagggcau	gcccuuuuuauguuguacuacuggugaucaugcacaaaaagcagugcaauguuaaaagggcau	gcccuuuuuauguuguacuacuggugaucaugcacaaaaagcagugcaauguuaaaagggcau	gcccuuuuuauguuguacuacuggugaucaugcacaaaaagcagugcaauguuaaaagggcau	gcccuuuuuauguuguacuacuggugaucaugcacaaaaagcagugcaauguuaaaagggcau	gcccuuuuuauguuguacuacuggugaucaugcacaaaaagcagugcaauguuaaaagggcau	gcccuuuuuauguuguacuacuggugaucaugcacaaaaagcagugcaauguuaaaagggcau	gcccuuuuuauguuguacuacuggugaucaugcacaaaaagcagugcaauguuaaaagggcau	gcccuuuuuauguuguacuacuggugaucaugcacaaaaagcagugcaauguuaaaagggcauu	cagugcaauguuaaaagggcau	cagugcaauguuaaaagggcau	cagugcaauguuaaaagggcau	cagugcaauguuaaaagggcau	cagugcaauguuaaaagggcau	cagugcaauguuaaaagggcau	cagugcaauguuaaaagggcau	cagugcaauguuaaaagggcau	cagugcaauguuaaaagggcauu	11502	7039	10186	6517	9032	6993	4282	3522	3482	1396.24	891.355	1032.94	785.008	1080.95	798.324	452.106	394.351	313.759
39	cli-miR-130a-5p	gcccuuuuuauguuguacuacuggugaucaugcacaaaaagcagugcaauguuaaaagggcau	gcccuuuuuauguuguacuacuggugaucaugcacaaaaagcagugcaauguuaaaagggcau	gcccuuuuuauguuguacuacuggugaucaugcacaaaaagcagugcaauguuaaaagggcau	gcccuuuuuauguuguacuacuggugaucaugcacaaaaagcagugcaauguuaaaagggcau	gcccuuuuuauguuguacuacuggugaucaugcacaaaaagcagugcaauguuaaaagggcau	gcccuuuuuauguuguacuacuggugaucaugcacaaaaagcagugcaauguuaaaagggcau	gcccuuuuuauguuguacuacuggugaucaugcacaaaaagcagugcaauguuaaaagggcau	gcccuuuuuauguuguacuacuggugaucaugcacaaaaagcagugcaauguuaaaagggcau	gcccuuuuuauguuguacuacuggugaucaugcacaaaaagcagugcaauguuaaaagggcauu	gcccuuuuuauguuguacuacu	gcccuuuuuauguuguacuac	gcccuuuuuauguuguacuacu	gcccuuuuuauguuguacuac	gcccuuuuuauguuguacuacu	gcccuuuuuauguuguacuac	gcccuuuuuauguuguacuac	gcccuuuuuauguuguacuac	gcccuuuuuauguuguacuacu	64	52	45	13	49	7	23	14	11	7.76905	6.58481	4.56334	1.56592	5.86432	0.799124	2.4284	1.56755	0.991198
40	cli-miR-130c-3p	gcccuuuuucuguuguacuacuggcaauuaugaugagcagugcaauauuaaaagggcau	gcccuuuuucuguuguacuacuggcaauuaugaugagcagugcaauauuaaaagggcau	gcccuuuuucuguuguacuacuggcaauuaugaugagcagugcaauauuaaaagggcau	gcccuuuuucuguuguacuacuggcaauuaugaugagcagugcaauauuaaaagggcau	gcccuuuuucuguuguacuacuggcaauuaugaugagcagugcaauauuaaaagggcau	gcccuuuuucuguuguacuacuggcaauuaugaugagcagugcaauauuaaaagggcau	gcccuuuuucuguuguacuacuggcaauuaugaugagcagugcaauauuaaaagggcau	gcccuuuuucuguuguacuacuggcaauuaugaugagcagugcaauauuaaaagggcau	gcccuuuuucuguuguacuacuggcaauuaugaugagcagugcaauauuaaaagggcau	cagugcaauauuaaaagggcau	cagugcaauauuaaaagggcau	cagugcaauauuaaaagggcau	cagugcaauauuaaaagggcau	cagugcaauauuaaaagggcau	cagugcaauauuaaaagggcau	cagugcaauauuaaaagggcau	cagugcaauauuaaaagggcau	cagugcaauauuaaaagggcau	11612	7494	10485	1411	1936	1558	229	453	314	1409.6	948.972	1063.26	169.963	231.701	177.862	24.1785	50.7215	28.2942
41	cli-miR-130c-5p	gcccuuuuucuguuguacuacuggcaauuaugaugagcagugcaauauuaaaagggcau	gcccuuuuucuguuguacuacuggcaauuaugaugagcagugcaauauuaaaagggcau	gcccuuuuucuguuguacuacuggcaauuaugaugagcagugcaauauuaaaagggcau	gcccuuuuucuguuguacuacuggcaauuaugaugagcagugcaauauuaaaagggcau	gcccuuuuucuguuguacuacuggcaauuaugaugagcagugcaauauuaaaagggcau	gcccuuuuucuguuguacuacuggcaauuaugaugagcagugcaauauuaaaagggcau	gcccuuuuucuguuguacuacuggcaauuaugaugagcagugcaauauuaaaagggcau	gcccuuuuucuguuguacuacuggcaauuaugaugagcagugcaauauuaaaagggcau	gcccuuuuucuguuguacuacuggcaauuaugaugagcagugcaauauuaaaagggcau	gcccuuuuucuguuguacuac	gcccuuuuucuguuguacuac	gcccuuuuucuguuguacuac	gcccuuuuucuguuguacuac	gcccuuuuucuguuguacuac	gcccuuuuucuguuguacuac	gcccuuuuucuguuguacuacu	gcccuuuuucuguuguacuac	gcccuuuuucuguuguacuac	419	224	226	30	159	51	4	23	11	50.863	28.3653	22.9181	3.61366	19.0291	5.82219	0.422331	2.57526	0.991198
42	cli-miR-1329-3p	acagugaucagguuacgauggauuucucaaguaacaaccucguagcuugaucacgau	uacagugaucagguuacgauggauuucucaaguaacaaccucguagcuugaucacgauauc	acagugaucagguuacgauggauuucucaaguaacaaccucguagcuugaucacgauau	null	acaagucuuggucugguuguagagauacagugaucagguuacgauggauuu	acagugaucagguuacgauggauuucucaaguaacaaccucguagcuugaucacgauau	caagucuuggucugguuguagagauacagugaucagguuacgauggauu	acagugaucagguuacgauggauuucucaaguaacaaccucguagcuugaucacgauau	acagugaucagguuacgauggauuucucaaguaacaaccucguagcuugaucacgauauc	ccucguagcuugaucacgau	cucguagcuugaucacgauauc	ccucguagcuugaucacgauau	null	acagugaucagguuacgauggauuu	ccucguagcuugaucacgauau	acagugaucagguuacgauggauu	accucguagcuugaucacgauau	cucguagcuugaucacgauauc	1	1	2	0	4	4	15	0	1	0.121391	0.126631	0.202815	0	0.47872	0.456642	1.58374	0	0.0901089
43	cli-miR-1329-5p	acagugaucagguuacgauggauuucucaaguaacaaccucguagcuugaucacgau	uacagugaucagguuacgauggauuucucaaguaacaaccucguagcuugaucacgauauc	acagugaucagguuacgauggauuucucaaguaacaaccucguagcuugaucacgauau	null	acaagucuuggucugguuguagagauacagugaucagguuacgauggauuu	acagugaucagguuacgauggauuucucaaguaacaaccucguagcuugaucacgauau	caagucuuggucugguuguagagauacagugaucagguuacgauggauu	acagugaucagguuacgauggauuucucaaguaacaaccucguagcuugaucacgauau	acagugaucagguuacgauggauuucucaaguaacaaccucguagcuugaucacgauauc	acagugaucagguuacgauggau	uacagugaucagguuacgaugga	acagugaucagguuacgauggau	null	acaagucuuggucugguuguag	acagugaucagguuacgauggauu	caagucuuggucugguuguag	acagugaucagguuacgauggauu	acagugaucagguuacgauggauu	38	17	22	0	0	79	0	27	25	4.61287	2.15273	2.23097	0	0	9.01868	0	3.02314	2.25272
44	cli-miR-133a-3p	agcugguaaaauggaaccaaaucaacuguucaauggauuugguccccuucaaccagcugu	agcugguaaaauggaaccaaaucaccucuucaauggauuugguccccuucaaccagcugu	agcugguaaaauggaaccaaaucaacuguucaauggauuugguccccuucaaccagcugu	agcugguaaaauggaaccaaaucaccucuucaauggauuugguccccuucaaccagcugu	agcugguaaaauggaaccaaaucaccucuucaauggauuugguccccuucaaccagcugu	agcugguaaaauggaaccaaaucaccucuucaauggauuugguccccuucaaccagcugu	agcugguaaaauggaaccaaaucaccucuucaauggauuugguccccuucaaccagcugu	agcugguaaaauggaaccaaaucaccucuucaauggauuugguccccuucaaccagcugu	agcugguaaaauggaaccaaaucaccucuucaauggauuugguccccuucaaccagcugu	uuugguccccuucaaccagcugu	uuugguccccuucaaccagcugu	uuugguccccuucaaccagcugu	uuugguccccuucaaccagcugu	uuugguccccuucaaccagcugu	uuugguccccuucaaccagcugu	uuugguccccuucaaccagcugu	uuugguccccuucaaccagcugu	uuugguccccuucaaccagcugu	1081964	1217570	2253198	3508244	2753130	3296196	5062617	4914064	6329363	131341	154182	228491	422587	329495	376295	534525	550218	570332
45	cli-miR-133a-5p	agcugguaaaauggaaccaaaucaacuguucaauggauuugguccccuucaaccagcugu	agcugguaaaauggaaccaaaucaccucuucaauggauuugguccccuucaaccagcugu	agcugguaaaauggaaccaaaucaacuguucaauggauuugguccccuucaaccagcugu	agcugguaaaauggaaccaaaucaccucuucaauggauuugguccccuucaaccagcugu	agcugguaaaauggaaccaaaucaccucuucaauggauuugguccccuucaaccagcugu	agcugguaaaauggaaccaaaucaccucuucaauggauuugguccccuucaaccagcugu	agcugguaaaauggaaccaaaucaccucuucaauggauuugguccccuucaaccagcugu	agcugguaaaauggaaccaaaucaccucuucaauggauuugguccccuucaaccagcugu	agcugguaaaauggaaccaaaucaccucuucaauggauuugguccccuucaaccagcugu	agcugguaaaauggaaccaaau	agcugguaaaauggaaccaaau	agcugguaaaauggaaccaaau	agcugguaaaauggaaccaaau	agcugguaaaauggaaccaaau	agcugguaaaauggaaccaaau	agcugguaaaauggaaccaaau	agcugguaaaauggaaccaaau	agcugguaaaauggaaccaaau	3908	2134	3227	1874	7198	2848	3224	2033	2112	474.397	270.23	327.242	225.733	861.457	325.129	340.399	227.631	190.31
46	cli-miR-133c-3p	gcugguaaaaaggaaccagaucaacuugcaacuggauuugguccccuucaaccagcug	gcugguaaaaaggaaccagaucaacuugcaacuggauuugguccccuucaaccagcug	gcugguaaaaaggaaccagaucaacuugcaacuggauuugguccccuucaaccagcug	ggcugguaaaaaggaaccagaucaacuugcaacuggauuugguccccuucaaccagcug	ggcugguaaaaaggaaccagaucaacuugcaacuggauuugguccccuucaaccagcug	gcugguaaaaaggaaccagaucaacuugcaacuggauuugguccccuucaaccagcug	gcugguaaaaaggaaccagaucaacuugcaacuggauuugguccccuucaaccagcug	gcugguaaaaaggaaccagaucaacuugcaacuggauuugguccccuucaaccagcug	gggcugguaaaaaggaaccagaucaacuugcaacuggauuugguccccuucaaccagcug	uuugguccccuucaaccagcug	uuugguccccuucaaccagcug	uuugguccccuucaaccagcug	uuugguccccuucaaccagcug	uuugguccccuucaaccagcug	uuugguccccuucaaccagcug	uuugguccccuucaaccagcug	uuugguccccuucaaccagcug	uuugguccccuucaaccagcug	121876	109755	275024	104292	58782	76819	112676	121690	164817	14794.7	13898.4	27889.5	12562.5	7035.03	8769.7	11896.6	13625.4	14851.5
47	cli-miR-135-3p	uauggcuuuuuauuccuaugugauaguaauaaagucucauguagggauggaagccaugaaau	uauggcuuuuuauuccuaugugauuauacaucccacuucauauagggauugaagccgugca	uauggcuuuuuauuccuaugugauuauacaucccacuucauauagggauugaagccgugcaau	uauggcuuuuuauuccuaugugauaguaauaaagucucauguagggauggaagccaugaa	uauggcuuuuuauuccuaugugauaguaauaaagucucauguagggauggaagccaugaaa	uauggcuuuuuauuccuaugugauuauacaucccacuucauauagggauugaagccgugca	uauggcuuuuuauuccuaugugauaguaauaaagucucauguagggauggaagccaugaaa	uauggcuuuuuauuccuaugugauaguaauaaagucucauguagggauggaagccaugaa	uauggcuuuuuauuccuaugugauaguaauaaagucucauguagggauggaagccaugaa	uguagggauggaagccaugaaau	auauagggauugaagccgugca	uauagggauugaagccgugcaau	auguagggauggaagccaugaa	uguagggauggaagccaugaaa	auauagggauugaagccgugca	uguagggauggaagccaugaaa	auguagggauggaagccaugaa	auguagggauggaagccaugaa	1	0	1	0	1	0	2	0	0	0.121391	0	0.101408	0	0.11968	0	0.211166	0	0
48	cli-miR-135-5p	uauggcuuuuuauuccuaugugauaguaauaaagucucauguagggauggaagccaugaaau	uauggcuuuuuauuccuaugugauuauacaucccacuucauauagggauugaagccgugca	uauggcuuuuuauuccuaugugauuauacaucccacuucauauagggauugaagccgugcaau	uauggcuuuuuauuccuaugugauaguaauaaagucucauguagggauggaagccaugaa	uauggcuuuuuauuccuaugugauaguaauaaagucucauguagggauggaagccaugaaa	uauggcuuuuuauuccuaugugauuauacaucccacuucauauagggauugaagccgugca	uauggcuuuuuauuccuaugugauaguaauaaagucucauguagggauggaagccaugaaa	uauggcuuuuuauuccuaugugauaguaauaaagucucauguagggauggaagccaugaa	uauggcuuuuuauuccuaugugauaguaauaaagucucauguagggauggaagccaugaa	uauggcuuuuuauuccuauguga	uauggcuuuuuauuccuauguga	uauggcuuuuuauuccuauguga	uauggcuuuuuauuccuauguga	uauggcuuuuuauuccuauguga	uauggcuuuuuauuccuauguga	uauggcuuuuuauuccuauguga	uauggcuuuuuauuccuauguga	uauggcuuuuuauuccuauguga	14	22	21	5	12	38	23	6	25	1.69948	2.78588	2.12956	0.602277	1.43616	4.3381	2.4284	0.671808	2.25272
49	cli-miR-137a-3p	null	acggguauucuuggguggauaauacggauuacguuguuauugcuuaagaauacgcguag	acggguauucuuggguggauaauacggauuacguuguuauugcuuaagaauacgcguag	null	null	null	null	null	acggguauucuuggguggauaauacggauuacguuguuauugcuuaagaauacgcguag	null	uuauugcuuaagaauacgcguag	uuauugcuuaagaauacgcguag	null	null	null	null	null	uuauugcuuaagaauacgcguag	0	70	65	0	0	0	0	0	30	0	8.86416	6.59149	0	0	0	0	0	2.70327
50	cli-miR-138-3p	agcugguguugugaaucaggccgucaccagucggagaacggcuacuucacaacaccaggguc	agcugguguugugaaucaggccgucaccagucggagaacggcuacuucacaacaccaggguc	agcugguguugugaaucaggccgucaccagucggagaacggcuacuucacaacaccaggguc	agcugguguugugaaucaggccgucaccagucggagaacggcuacuucacaacaccaggguc	agcugguguugugaaucaggccgucaccagucggagaacggcuacuucacaacaccagggu	agcugguguugugaaucaggccgucaccagucggagaacggcuacuucacaacaccaggguc	agcugguguugugaaucaggccgucaccagucggagaacggcuacuucacaacaccaggguc	agcugguguugugaaucaggccgucaccagucggagaacggcuacuucacaacaccagggu	agcugguguugugaaucaggccgucaccagucggagaacggcuacuucacaacaccaggguc	gcuacuucacaacaccaggguc	gcuacuucacaacaccaggguc	gcuacuucacaacaccaggguc	gcuacuucacaacaccaggguc	gcuacuucacaacaccagggu	gcuacuucacaacaccaggguc	gcuacuucacaacaccaggguc	gcuacuucacaacaccagggu	gcuacuucacaacaccaggguc	0	0	0	0	1	0	0	1	0	0	0	0	0	0.11968	0	0	0.111968	0
51	cli-miR-138-5p	agcugguguugugaaucaggccgucaccagucggagaacggcuacuucacaacaccaggguc	agcugguguugugaaucaggccgucaccagucggagaacggcuacuucacaacaccaggguc	agcugguguugugaaucaggccgucaccagucggagaacggcuacuucacaacaccaggguc	agcugguguugugaaucaggccgucaccagucggagaacggcuacuucacaacaccaggguc	agcugguguugugaaucaggccgucaccagucggagaacggcuacuucacaacaccagggu	agcugguguugugaaucaggccgucaccagucggagaacggcuacuucacaacaccaggguc	agcugguguugugaaucaggccgucaccagucggagaacggcuacuucacaacaccaggguc	agcugguguugugaaucaggccgucaccagucggagaacggcuacuucacaacaccagggu	agcugguguugugaaucaggccgucaccagucggagaacggcuacuucacaacaccaggguc	agcugguguugugaaucaggccg	agcugguguugugaaucaggccg	agcugguguugugaaucaggccg	agcugguguugugaaucaggccg	agcugguguugugaaucaggccg	agcugguguugugaaucaggccg	agcugguguugugaaucaggccg	agcugguguugugaaucaggccg	agcugguguugugaaucaggccg	735	528	771	285	276	233	45	30	56	89.2226	66.8611	78.1853	34.3298	33.0317	26.5994	4.75123	3.35904	5.0461
52	cli-miR-1388-3p	aggacugucuaaccugagaauggugaaauguaagggucaaucucagguucgucagcccaug	aggacugucuaaccugagaauggugaaauguaagggucaaucucagguucgucagcccauga	aggacugucuaaccugagaauggugaaauguaagggucaaucucagguucgucagcccaug	aggacugucuaaccugagaauggugaaauguaagggucaaucucagguucgucagcccauga	aggacugucuaaccugagaauggugaaauguaagggucaaucucagguucgucagcccauga	aggacugucuaaccugagaauggugaaauguaagggucaaucucagguucgucagcccauga	aggacugucuaaccugagaauggugaaauguaagggucaaucucagguucgucagcccauga	aggacugucuaaccugagaauggugaaauguaagggucaaucucagguucgucagcccauga	aggacugucuaaccugagaauggugaaauguaagggucaaucucagguucgucagcccauga	aucucagguucgucagcccaug	aucucagguucgucagcccauga	aucucagguucgucagcccaug	aucucagguucgucagcccauga	aucucagguucgucagcccauga	aucucagguucgucagcccauga	aucucagguucgucagcccauga	aucucagguucgucagcccauga	aucucagguucgucagcccauga	11	8	13	522	846	384	130	377	148	1.3353	1.01305	1.3183	62.8777	101.249	43.8376	13.7258	42.2119	13.3361
53	cli-miR-1388-5p	aggacugucuaaccugagaauggugaaauguaagggucaaucucagguucgucagcccaug	aggacugucuaaccugagaauggugaaauguaagggucaaucucagguucgucagcccauga	aggacugucuaaccugagaauggugaaauguaagggucaaucucagguucgucagcccaug	aggacugucuaaccugagaauggugaaauguaagggucaaucucagguucgucagcccauga	aggacugucuaaccugagaauggugaaauguaagggucaaucucagguucgucagcccauga	aggacugucuaaccugagaauggugaaauguaagggucaaucucagguucgucagcccauga	aggacugucuaaccugagaauggugaaauguaagggucaaucucagguucgucagcccauga	aggacugucuaaccugagaauggugaaauguaagggucaaucucagguucgucagcccauga	aggacugucuaaccugagaauggugaaauguaagggucaaucucagguucgucagcccauga	aggacugucuaaccugagaaug	aggacugucuaaccugagaau	aggacugucuaaccugagaaug	aggacugucuaaccugagaaug	aggacugucuaaccugagaaug	aggacugucuaaccugagaaug	aggacugucuaaccugagaau	aggacugucuaaccugagaaug	aggacugucuaaccugagaaug	70	11	32	828	1145	428	129	456	192	8.49739	1.39294	3.24504	99.7371	137.034	48.8607	13.6202	51.0574	17.3009
54	cli-miR-140-3p	cagugguuuuacccuaugguagguuacgucaugcuguucuaccacaggguagaaccacggac	cagugguuuuacccuaugguagguuacgucaugcuguucuaccacaggguagaaccacggac	cagugguuuuacccuaugguagguuacgucaugcuguucuaccacaggguagaaccacggac	cagugguuuuacccuaugguagguuacgucaugcuguucuaccacaggguagaaccacggacg	cagugguuuuacccuaugguagguuacgucaugcuguucuaccacaggguagaaccacggacg	cagugguuuuacccuaugguagguuacgucaugcuguucuaccacaggguagaaccacggacg	cagugguuuuacccuaugguagguuacgucaugcuguucuaccacaggguagaaccacggacg	cagugguuuuacccuaugguagguuacgucaugcuguucuaccacaggguagaaccacggacg	cagugguuuuacccuaugguagguuacgucaugcuguucuaccacaggguagaaccacggacg	accacaggguagaaccacggac	accacaggguagaaccacggac	accacaggguagaaccacggac	accacaggguagaaccacggacg	accacaggguagaaccacggacg	accacaggguagaaccacggacg	accacaggguagaaccacggacg	accacaggguagaaccacggacg	accacaggguagaaccacggacg	21325	15943	20215	13135	16105	15380	9583	8250	7675	2588.67	2018.88	2049.95	1582.18	1927.45	1755.79	1011.8	923.736	691.586
55	cli-miR-140-5p	cagugguuuuacccuaugguagguuacgucaugcuguucuaccacaggguagaaccacggac	cagugguuuuacccuaugguagguuacgucaugcuguucuaccacaggguagaaccacggac	cagugguuuuacccuaugguagguuacgucaugcuguucuaccacaggguagaaccacggac	cagugguuuuacccuaugguagguuacgucaugcuguucuaccacaggguagaaccacggacg	cagugguuuuacccuaugguagguuacgucaugcuguucuaccacaggguagaaccacggacg	cagugguuuuacccuaugguagguuacgucaugcuguucuaccacaggguagaaccacggacg	cagugguuuuacccuaugguagguuacgucaugcuguucuaccacaggguagaaccacggacg	cagugguuuuacccuaugguagguuacgucaugcuguucuaccacaggguagaaccacggacg	cagugguuuuacccuaugguagguuacgucaugcuguucuaccacaggguagaaccacggacg	cagugguuuuacccuaugguag	cagugguuuuacccuaugguag	cagugguuuuacccuaugguag	cagugguuuuacccuaugguag	cagugguuuuacccuaugguag	cagugguuuuacccuaugguag	cagugguuuuacccuaugguag	cagugguuuuacccuaugguag	cagugguuuuacccuaugguag	838	687	994	477	584	522	307	282	239	101.726	86.9954	100.799	57.4572	69.8932	59.5918	32.4139	31.575	21.536
56	cli-miR-1416-3p	uccuuaacucaugccgcugugccuuuuuauuuguuucacaauugugugaguugaguaca	uccuuaacucaugccgcugugccuuuuuauuuguuucacaauugugugaguugaguaca	uccuuaacucaugccgcugugccuuuuuauuuguuucacaauugugugaguugaguaca	caaggaaucacuucaugaaaggugggguugacucucuuuccuuaacucaugccgcugug	uccuuaacucaugccgcugugccuuuuuauuuguuucacaauugugugaguugaguaca	uccuuaacucaugccgcugugccuuuuuauuuguuucacaauugugugaguugaguaca	uccuuaacucaugccgcugugccuuuuuauuuguuucacaauugugugaguugaguaca	uccuuaacucaugccgcugugccuuuuuauuuguuucacaauugugugaguugaguaca	uccuuaacucaugccgcugugccuuuuuauuuguuucacaauugugugaguugaguaca	acaauugugugaguugaguaca	acaauugugugaguugaguaca	acaauugugugaguugaguaca	uccuuaacucaugccgcugug	acaauugugugaguugaguaca	acaauugugugaguugaguaca	acaauugugugaguugaguaca	acaauugugugaguugaguaca	acaauugugugaguugaguaca	31	11	14	202	13	6	18	6	12	3.76313	1.39294	1.41971	24.332	1.55584	0.684963	1.90049	0.671808	1.08131
57	cli-miR-1416-5p	uccuuaacucaugccgcugugccuuuuuauuuguuucacaauugugugaguugaguaca	uccuuaacucaugccgcugugccuuuuuauuuguuucacaauugugugaguugaguaca	uccuuaacucaugccgcugugccuuuuuauuuguuucacaauugugugaguugaguaca	caaggaaucacuucaugaaaggugggguugacucucuuuccuuaacucaugccgcugug	uccuuaacucaugccgcugugccuuuuuauuuguuucacaauugugugaguugaguaca	uccuuaacucaugccgcugugccuuuuuauuuguuucacaauugugugaguugaguaca	uccuuaacucaugccgcugugccuuuuuauuuguuucacaauugugugaguugaguaca	uccuuaacucaugccgcugugccuuuuuauuuguuucacaauugugugaguugaguaca	uccuuaacucaugccgcugugccuuuuuauuuguuucacaauugugugaguugaguaca	uccuuaacucaugccgcugugc	uccuuaacucaugccgcugugc	uccuuaacucaugccgcugugc	caaggaaucacuucaugaaaggugg	uccuuaacucaugccgcugug	uccuuaacucaugccgcugug	uccuuaacucaugccgcugug	uccuuaacucaugccgcugugc	uccuuaacucaugccgcugug	650	933	560	0	807	328	818	469	725	78.9044	118.147	56.7883	0	96.5818	37.4446	86.3667	52.513	65.329
58	cli-miR-142-3p	cauaaaguagaaagcacuacuaaacagcacugcaggguguaguguuuccuacuuuaugga	cauaaaguagaaagcacuacuaaacagcacugcaggguguaguguuuccuacuuuaugga	cauaaaguagaaagcacuacuaaacagcacugcaggguguaguguuuccuacuuuaugga	cauaaaguagaaagcacuacuaaacagcacugcaggguguaguguuuccuacuuuaugga	cauaaaguagaaagcacuacuaaacagcacugcaggguguaguguuuccuacuuuaugga	cauaaaguagaaagcacuacuaaacagcacugcaggguguaguguuuccuacuuuaugga	cauaaaguagaaagcacuacuaaacagcacugcaggguguaguguuuccuacuuuaugga	cauaaaguagaaagcacuacuaaacagcacugcaggguguaguguuuccuacuuuaugga	cauaaaguagaaagcacuacuaaacagcacugcaggguguaguguuuccuacuuuaugga	uguaguguuuccuacuuuaugga	uguaguguuuccuacuuuaugga	uguaguguuuccuacuuuaugga	uguaguguuuccuacuuuaugga	uguaguguuuccuacuuuaugga	uguaguguuuccuacuuuaugga	uguaguguuuccuacuuuaugga	uguaguguuuccuacuuuaugga	uguaguguuuccuacuuuaugga	386	205	217	872	974	1174	475	379	314	46.8571	25.9593	22.0055	105.037	116.568	134.024	50.1518	42.4359	28.2942
59	cli-miR-142-5p	cauaaaguagaaagcacuacuaaacagcacugcaggguguaguguuuccuacuuuaugga	cauaaaguagaaagcacuacuaaacagcacugcaggguguaguguuuccuacuuuaugga	cauaaaguagaaagcacuacuaaacagcacugcaggguguaguguuuccuacuuuaugga	cauaaaguagaaagcacuacuaaacagcacugcaggguguaguguuuccuacuuuaugga	cauaaaguagaaagcacuacuaaacagcacugcaggguguaguguuuccuacuuuaugga	cauaaaguagaaagcacuacuaaacagcacugcaggguguaguguuuccuacuuuaugga	cauaaaguagaaagcacuacuaaacagcacugcaggguguaguguuuccuacuuuaugga	cauaaaguagaaagcacuacuaaacagcacugcaggguguaguguuuccuacuuuaugga	cauaaaguagaaagcacuacuaaacagcacugcaggguguaguguuuccuacuuuaugga	cauaaaguagaaagcacuacu	cauaaaguagaaagcacuacu	cauaaaguagaaagcacuacu	cauaaaguagaaagcacuacu	cauaaaguagaaagcacuacu	cauaaaguagaaagcacuacu	cauaaaguagaaagcacuacu	cauaaaguagaaagcacuacu	cauaaaguagaaagcacuacu	7810	3488	3000	16896	15911	17624	8180	8707	5972	948.066	441.689	304.223	2035.21	1904.23	2011.96	863.667	974.905	538.13
60	cli-miR-143-3p	ggugcagugcugcaucucuggucaauugggagucugagaugaagcacuguagcuc	ggugcagugcugcaucucuggucaauugggagucugagaugaagcacuguagcuc	ggugcagugcugcaucucuggucaauugggagucugagaugaagcacuguagcuc	ggugcagugcugcaucucuggucaauugggagucugagaugaagcacuguagcucg	ggugcagugcugcaucucuggucaauugggagucugagaugaagcacuguagcucg	ggugcagugcugcaucucuggucaauugggagucugagaugaagcacuguagcucg	ggugcagugcugcaucucuggucaauugggagucugagaugaagcacuguagcucg	ggugcagugcugcaucucuggucaauugggagucugagaugaagcacuguagcucg	ggugcagugcugcaucucuggucaauugggagucugagaugaagcacuguagcucg	ugagaugaagcacuguagcuc	ugagaugaagcacuguagcuc	ugagaugaagcacuguagcuc	ugagaugaagcacuguagcucg	ugagaugaagcacuguagcucg	ugagaugaagcacuguagcucg	ugagaugaagcacuguagcucg	ugagaugaagcacuguagcucg	ugagaugaagcacuguagcucg	494172	460956	244522	1209888	861194	939769	346477	144650	186177	59988.2	58371.3	24796.4	145738	103068	107285	36582	16196.2	16776.2
61	cli-miR-143-5p	ggugcagugcugcaucucuggucaauugggagucugagaugaagcacuguagcuc	ggugcagugcugcaucucuggucaauugggagucugagaugaagcacuguagcuc	ggugcagugcugcaucucuggucaauugggagucugagaugaagcacuguagcuc	ggugcagugcugcaucucuggucaauugggagucugagaugaagcacuguagcucg	ggugcagugcugcaucucuggucaauugggagucugagaugaagcacuguagcucg	ggugcagugcugcaucucuggucaauugggagucugagaugaagcacuguagcucg	ggugcagugcugcaucucuggucaauugggagucugagaugaagcacuguagcucg	ggugcagugcugcaucucuggucaauugggagucugagaugaagcacuguagcucg	ggugcagugcugcaucucuggucaauugggagucugagaugaagcacuguagcucg	ggugcagugcugcaucucugguc	ggugcagugcugcaucucugguc	ggugcagugcugcaucucugguc	ggugcagugcugcaucucugguca	ggugcagugcugcaucucugguca	ggugcagugcugcaucucugguc	ggugcagugcugcaucucugguc	ggugcagugcugcaucucugguca	ggugcagugcugcaucucugguc	314	214	188	369	608	492	117	49	66	38.1169	27.099	19.0646	44.4481	72.7655	56.167	12.3532	5.48643	5.94719
62	cli-miR-1451-3p	ucgcacaggggcaaguuaccgcguucagcucaccugcaguaacuugcuccugugagaggu	ucgcacaggggcaaguuaccgcguucagcucaccugcaguaacuugcuccugugagaggu	ucgcacaggggcaaguuaccgcguucagcucaccugcaguaacuugcuccugugagagg	ucgcacaggggcaaguuaccgcguucagcucaccugcaguaacuugcuccugugagagg	ucgcacaggggcaaguuaccgcguucagcucaccugcaguaacuugcuccugugagagg	ucgcacaggggcaaguuaccgcguucagcucaccugcaguaacuugcuccugugagagg	ucgcacaggggcaaguuaccgcguucagcucaccugcaguaacuugcuccugugaga	ucgcacaggggcaaguuaccgcguucagcucaccugcaguaacuugcuccugugaga	ucgcacaggggcaaguuaccgcguucagcucaccugcaguaacuugcuccugugaga	aguaacuugcuccugugagaggu	aguaacuugcuccugugagaggu	aguaacuugcuccugugagagg	caguaacuugcuccugugagagg	caguaacuugcuccugugagagg	caguaacuugcuccugugagagg	caguaacuugcuccugugaga	caguaacuugcuccugugaga	caguaacuugcuccugugaga	7	7	8	2	3	2	2	5	4	0.849739	0.886416	0.811261	0.240911	0.35904	0.228321	0.211166	0.55984	0.360436
63	cli-miR-1451-5p	ucgcacaggggcaaguuaccgcguucagcucaccugcaguaacuugcuccugugagaggu	ucgcacaggggcaaguuaccgcguucagcucaccugcaguaacuugcuccugugagaggu	ucgcacaggggcaaguuaccgcguucagcucaccugcaguaacuugcuccugugagagg	ucgcacaggggcaaguuaccgcguucagcucaccugcaguaacuugcuccugugagagg	ucgcacaggggcaaguuaccgcguucagcucaccugcaguaacuugcuccugugagagg	ucgcacaggggcaaguuaccgcguucagcucaccugcaguaacuugcuccugugagagg	ucgcacaggggcaaguuaccgcguucagcucaccugcaguaacuugcuccugugaga	ucgcacaggggcaaguuaccgcguucagcucaccugcaguaacuugcuccugugaga	ucgcacaggggcaaguuaccgcguucagcucaccugcaguaacuugcuccugugaga	ucgcacaggggcaaguuaccgc	ucgcacaggggcaaguuaccgc	ucgcacaggggcaaguuaccgc	ucgcacaggggcaaguuaccgc	ucgcacaggggcaaguuaccgc	ucgcacaggggcaaguuaccgc	ucgcacaggggcaaguuaccgc	ucgcacaggggcaaguuaccgc	ucgcacaggggcaaguuaccgc	381	274	266	165	239	251	171	224	181	46.2501	34.6969	26.9744	19.8751	28.6035	28.6543	18.0547	25.0808	16.3097
64	cli-miR-145-3p	guccaguuuucccaggaaucccuuaggcgcuacguuggggauuccuggaaauacuguucuu	guccaguuuucccaggaaucccuuaggcgcuacguuggggauuccuggaaauacuguucuu	guccaguuuucccaggaaucccuuaggcgcuacguuggggauuccuggaaauacuguucuu	guccaguuuucccaggaaucccuuaggcgcuacguuggggauuccuggaaauacuguucuu	guccaguuuucccaggaaucccuuaggcgcuacguuggggauuccuggaaauacuguucuu	guccaguuuucccaggaaucccuuaggcgcuacguuggggauuccuggaaauacuguucuu	guccaguuuucccaggaaucccuuaggcgcuacguuggggauuccuggaaauacuguucuu	guccaguuuucccaggaaucccuuaggcgcuacguuggggauuccuggaaauacuguucuu	guccaguuuucccaggaaucccuuaggcgcuacguuggggauuccuggaaauacuguucuu	auuccuggaaauacuguucuu	auuccuggaaauacuguucuu	auuccuggaaauacuguucuu	auuccuggaaauacuguucuu	auuccuggaaauacuguucuu	auuccuggaaauacuguucuu	auuccuggaaauacuguucuu	auuccuggaaauacuguucuu	auuccuggaaauacuguucuu	596	477	324	1473	1322	1569	568	452	424	72.3492	60.4029	32.8561	177.431	158.217	179.118	59.971	50.6095	38.2062
65	cli-miR-145-5p	guccaguuuucccaggaaucccuuaggcgcuacguuggggauuccuggaaauacuguucuu	guccaguuuucccaggaaucccuuaggcgcuacguuggggauuccuggaaauacuguucuu	guccaguuuucccaggaaucccuuaggcgcuacguuggggauuccuggaaauacuguucuu	guccaguuuucccaggaaucccuuaggcgcuacguuggggauuccuggaaauacuguucuu	guccaguuuucccaggaaucccuuaggcgcuacguuggggauuccuggaaauacuguucuu	guccaguuuucccaggaaucccuuaggcgcuacguuggggauuccuggaaauacuguucuu	guccaguuuucccaggaaucccuuaggcgcuacguuggggauuccuggaaauacuguucuu	guccaguuuucccaggaaucccuuaggcgcuacguuggggauuccuggaaauacuguucuu	guccaguuuucccaggaaucccuuaggcgcuacguuggggauuccuggaaauacuguucuu	guccaguuuucccaggaaucccu	guccaguuuucccaggaaucccu	guccaguuuucccaggaaucccu	guccaguuuucccaggaaucccu	guccaguuuucccaggaaucccu	guccaguuuucccaggaaucccu	guccaguuuucccaggaaucccu	guccaguuuucccaggaaucccu	guccaguuuucccaggaaucccu	4399	3194	4673	5599	6848	8132	2376	1455	1985	534.001	404.459	473.878	674.43	819.569	928.353	250.865	162.913	178.866
66	cli-miR-1467-3p	ucucagcuacgucgguguaaauccagagcaacuccacugagauucacaccagaguaacugagagc	ucucagcuacgucgguguaaauccagagcaacuccacugagauucacaccagaguaacugagagc	ucucagcuacgucgguguaaauccagagcaacuccacugagauucacaccagaguaacugagagc	ucucagcuacgucgguguaaauccagagcaacuccacugagauucacaccagaguaacugagagc	ucucagcuacgucgguguaaauccagagcaacuccacugagauucacaccagaguaacugagagc	ucucagcuacgucgguguaaauccagagcaacuccacugagauucacaccagaguaacugagagc	ucucagcuacgucgguguaaauccagagcaacuccacugagauucacaccagaguaacugagagc	ucucagcuacgucgguguaaauccagagcaacuccacugagauucacaccagaguaacugagagc	ucucagcuacgucgguguaaauccagagcaacuccacugagauucacaccagaguaacugagagc	uucacaccagaguaacugagagc	uucacaccagaguaacugagagc	uucacaccagaguaacugagagc	uucacaccagaguaacugagagc	uucacaccagaguaacugagagc	uucacaccagaguaacugagagc	uucacaccagaguaacugagagc	uucacaccagaguaacugagagc	uucacaccagaguaacugagagc	2914	2093	2190	1158	2228	1255	1134	920	852	353.734	265.038	222.083	139.487	266.647	143.271	119.731	103.011	76.7728
67	cli-miR-1467-5p	ucucagcuacgucgguguaaauccagagcaacuccacugagauucacaccagaguaacugagagc	ucucagcuacgucgguguaaauccagagcaacuccacugagauucacaccagaguaacugagagc	ucucagcuacgucgguguaaauccagagcaacuccacugagauucacaccagaguaacugagagc	ucucagcuacgucgguguaaauccagagcaacuccacugagauucacaccagaguaacugagagc	ucucagcuacgucgguguaaauccagagcaacuccacugagauucacaccagaguaacugagagc	ucucagcuacgucgguguaaauccagagcaacuccacugagauucacaccagaguaacugagagc	ucucagcuacgucgguguaaauccagagcaacuccacugagauucacaccagaguaacugagagc	ucucagcuacgucgguguaaauccagagcaacuccacugagauucacaccagaguaacugagagc	ucucagcuacgucgguguaaauccagagcaacuccacugagauucacaccagaguaacugagagc	ucucagcuacgucgguguaaauc	ucucagcuacgucgguguaaauc	ucucagcuacgucgguguaaauc	ucucagcuacgucgguguaaauc	ucucagcuacgucgguguaaauc	ucucagcuacgucgguguaaau	ucucagcuacgucgguguaaauc	ucucagcuacgucgguguaaauc	ucucagcuacgucgguguaaauc	85	47	65	30	43	25	26	19	13	10.3183	5.95165	6.59149	3.61366	5.14624	2.85401	2.74515	2.12739	1.17142
68	cli-miR-146a-3p	ugagaacugaauuccauggguuguaauugaauucgcugucagacccauggggcucaguucuucag	ugagaacugaauuccauggguuguaauugaauucgcugucagacccauggggcucaguucuuc	ugagaacugaauuccauggguuguaauugaauucgcugucagacccauggggcucaguucuuc	ugagaacugaauuccauggguuguaauugaauucgcugucagacccauggggcucaguucuuc	ugagaacugaauuccauggguuguaauugaauucgcugucagacccauggggcucaguucuuc	ugagaacugaauuccauggguuguaauugaauucgcugucagacccauggggcucaguucuuc	ugagaacugaauuccauggguuguaauugaauucgcugucagacccauggggcucaguucuuc	ugagaacugaauuccauggguuguaauugaauucgcugucagacccauggggcucaguucuuc	ugagaacugaauuccauggguuguaauugaauucgcugucagacccauggggcucaguucuuc	acccauggggcucaguucuucag	acccauggggcucaguucuuc	acccauggggcucaguucuuc	acccauggggcucaguucuuc	acccauggggcucaguucuuc	acccauggggcucaguucuuc	acccauggggcucaguucuuc	acccauggggcucaguucuuc	acccauggggcucaguucuuc	0	1	5	52	93	70	6	22	12	0	0.126631	0.507038	6.26368	11.1302	7.99124	0.633497	2.4633	1.08131
69	cli-miR-146a-5p	ugagaacugaauuccauggguuguaauugaauucgcugucagacccauggggcucaguucuucag	ugagaacugaauuccauggguuguaauugaauucgcugucagacccauggggcucaguucuuc	ugagaacugaauuccauggguuguaauugaauucgcugucagacccauggggcucaguucuuc	ugagaacugaauuccauggguuguaauugaauucgcugucagacccauggggcucaguucuuc	ugagaacugaauuccauggguuguaauugaauucgcugucagacccauggggcucaguucuuc	ugagaacugaauuccauggguuguaauugaauucgcugucagacccauggggcucaguucuuc	ugagaacugaauuccauggguuguaauugaauucgcugucagacccauggggcucaguucuuc	ugagaacugaauuccauggguuguaauugaauucgcugucagacccauggggcucaguucuuc	ugagaacugaauuccauggguuguaauugaauucgcugucagacccauggggcucaguucuuc	ugagaacugaauuccauggguug	ugagaacugaauuccauggguug	ugagaacugaauuccauggguug	ugagaacugaauuccauggguug	ugagaacugaauuccauggguug	ugagaacugaauuccauggguug	ugagaacugaauuccauggguug	ugagaacugaauuccauggguug	ugagaacugaauuccauggguug	149	284	275	3695	3508	5074	1427	690	892	18.0873	35.9632	27.8871	445.083	419.838	579.25	150.667	77.2579	80.3772
70	cli-miR-146b-3p	ugagaacugaauuccauaggcauuaaagccucuaaaaaugcccuauggauucaguucugca	ugagaacugaauuccauaggcauuaaagccucuaaaaaugcccuauggauucaguucugca	ugagaacugaauuccauaggcauuaaagccucuaaaaaugcccuauggauucaguucugca	ugagaacugaauuccauaggcauuaaagccucuaaaaaugcccuauggauucaguucugca	ugagaacugaauuccauaggcauuaaagccucuaaaaaugcccuauggauucaguucug	ugagaacugaauuccauaggcauuaaagccucuaaaaaugcccuauggauucaguucugca	ugagaacugaauuccauaggcauuaaagccucuaaaaaugcccuauggauucaguucug	ugagaacugaauuccauaggcauuaaagccucuaaaaaugcccuauggauucaguucug	ugagaacugaauuccauaggcauuaaagccucuaaaaaugcccuauggauucaguucug	ugcccuauggauucaguucugca	ugcccuauggauucaguucugca	ugcccuauggauucaguucugca	ugcccuauggauucaguucugca	ugcccuauggauucaguucug	ugcccuauggauucaguucugca	ugcccuauggauucaguucug	ugcccuauggauucaguucug	ugcccuauggauucaguucug	196	120	173	565	497	571	422	508	293	23.7927	15.1957	17.5435	68.0573	59.481	65.1856	44.5559	56.8797	26.4019
71	cli-miR-146b-5p	ugagaacugaauuccauaggcauuaaagccucuaaaaaugcccuauggauucaguucugca	ugagaacugaauuccauaggcauuaaagccucuaaaaaugcccuauggauucaguucugca	ugagaacugaauuccauaggcauuaaagccucuaaaaaugcccuauggauucaguucugca	ugagaacugaauuccauaggcauuaaagccucuaaaaaugcccuauggauucaguucugca	ugagaacugaauuccauaggcauuaaagccucuaaaaaugcccuauggauucaguucug	ugagaacugaauuccauaggcauuaaagccucuaaaaaugcccuauggauucaguucugca	ugagaacugaauuccauaggcauuaaagccucuaaaaaugcccuauggauucaguucug	ugagaacugaauuccauaggcauuaaagccucuaaaaaugcccuauggauucaguucug	ugagaacugaauuccauaggcauuaaagccucuaaaaaugcccuauggauucaguucug	ugagaacugaauuccauaggcauu	ugagaacugaauuccauaggcauu	ugagaacugaauuccauaggcauu	ugagaacugaauuccauaggcau	ugagaacugaauuccauaggcau	ugagaacugaauuccauaggcau	ugagaacugaauuccauaggcau	ugagaacugaauuccauaggcau	ugagaacugaauuccauaggcau	5681	6810	5788	29224	13396	39831	17333	8344	11337	689.624	862.357	586.947	3520.19	1603.23	4547.13	1830.07	934.261	1021.56
72	cli-miR-146c-3p	ugagaacugaauuccauggacugguuccaguuccauguguucaguccaugguauucaguucucu	ugagaacugaauuccauggacugguuccaguuccauguguucaguccaugguauucaguucucu	ugagaacugaauuccauggacugguuccaguuccauguguucaguccaugguauucaguucucua	ugagaacugaauuccauggacugguuccaguuccauguguucaguccaugguauucaguucucu	ugagaacugaauuccauggacugguuccaguuccauguguucaguccaugguauucaguucucu	ugagaacugaauuccauggacugguuccaguuccauguguucaguccaugguauucaguucucu	ugagaacugaauuccauggacugguuccaguuccauguguucaguccaugguauucaguucucuag	ugagaacugaauuccauggacugguuccaguuccauguguucaguccaugguauucaguucucuag	ugagaacugaauuccauggacugguuccaguuccauguguucaguccaugguauucaguucucuag	guccaugguauucaguucucu	guccaugguauucaguucucu	guccaugguauucaguucucua	guccaugguauucaguucucu	guccaugguauucaguucucu	guccaugguauucaguucucu	uccaugguauucaguucucuag	uccaugguauucaguucucuag	uccaugguauucaguucucuag	482	273	249	366	647	571	466	646	443	58.5106	34.5702	25.2505	44.0867	77.433	65.1856	49.2016	72.3313	39.9182
73	cli-miR-146c-5p	ugagaacugaauuccauggacugguuccaguuccauguguucaguccaugguauucaguucucu	ugagaacugaauuccauggacugguuccaguuccauguguucaguccaugguauucaguucucu	ugagaacugaauuccauggacugguuccaguuccauguguucaguccaugguauucaguucucua	ugagaacugaauuccauggacugguuccaguuccauguguucaguccaugguauucaguucucu	ugagaacugaauuccauggacugguuccaguuccauguguucaguccaugguauucaguucucu	ugagaacugaauuccauggacugguuccaguuccauguguucaguccaugguauucaguucucu	ugagaacugaauuccauggacugguuccaguuccauguguucaguccaugguauucaguucucuag	ugagaacugaauuccauggacugguuccaguuccauguguucaguccaugguauucaguucucuag	ugagaacugaauuccauggacugguuccaguuccauguguucaguccaugguauucaguucucuag	ugagaacugaauuccauggacug	ugagaacugaauuccauggacug	ugagaacugaauuccauggacug	ugagaacugaauuccauggacu	ugagaacugaauuccauggacug	ugagaacugaauuccauggacu	ugagaacugaauuccauggacugg	ugagaacugaauuccauggacugg	ugagaacugaauuccauggacugg	80269	92470	56134	141821	72263	166061	121732	78050	108033	9743.96	11709.6	5692.41	17083.1	8648.44	18957.6	12852.8	8739.1	9734.74
74	cli-miR-148a-3p	aaaguucugugacacuccgacucuggguacgauagcagucagugcacuacagaacuuugu	aaaguucugugacacuccgacucuggguacgauagcagucagugcacuacagaacuuugu	aaaguucugugacacuccgacucuggguacgauagcagucagugcacuacagaacuuugu	aaaguucugugacacuccgacucuggguacgauagcagucagugcacuacagaacuuugu	aaaguucugugacacuccgacucuggguacgauagcagucagugcacuacagaacuuugu	aaaguucugugacacuccgacucuggguacgauagcagucagugcacuacagaacuuugu	aaaguucugugacacuccgacucuggguacgauagcagucagugcacuacagaacuuugu	aaaguucugugacacuccgacucuggguacgauagcagucagugcacuacagaacuuugu	aaaguucugugacacuccgacucuggguacgauagcagucagugcacuacagaacuuugu	ucagugcacuacagaacuuugu	ucagugcacuacagaacuuugu	ucagugcacuacagaacuuugu	ucagugcacuacagaacuuugu	ucagugcacuacagaacuuugu	ucagugcacuacagaacuuugu	ucagugcacuacagaacuuugu	ucagugcacuacagaacuuugu	ucagugcacuacagaacuuugu	598414	595187	700261	218800	267446	258982	91719	136672	130154	72642.3	75369.1	71011.8	26355.6	32008	29565.5	9683.95	15302.9	11728
75	cli-miR-148a-5p	aaaguucugugacacuccgacucuggguacgauagcagucagugcacuacagaacuuugu	aaaguucugugacacuccgacucuggguacgauagcagucagugcacuacagaacuuugu	aaaguucugugacacuccgacucuggguacgauagcagucagugcacuacagaacuuugu	aaaguucugugacacuccgacucuggguacgauagcagucagugcacuacagaacuuugu	aaaguucugugacacuccgacucuggguacgauagcagucagugcacuacagaacuuugu	aaaguucugugacacuccgacucuggguacgauagcagucagugcacuacagaacuuugu	aaaguucugugacacuccgacucuggguacgauagcagucagugcacuacagaacuuugu	aaaguucugugacacuccgacucuggguacgauagcagucagugcacuacagaacuuugu	aaaguucugugacacuccgacucuggguacgauagcagucagugcacuacagaacuuugu	aaaguucugugacacuccgacu	aaaguucugugacacuccgacu	aaaguucugugacacuccgacu	aaaguucugugacacuccgacu	aaaguucugugacacuccgacu	aaaguucugugacacuccgacu	aaaguucugugacacuccgacu	aaaguucugugacacuccgacu	aaaguucugugacacuccgacu	3617	1886	1969	267	406	484	171	305	215	439.072	238.826	199.672	32.1616	48.5901	55.2537	18.0547	34.1502	19.3734
76	cli-miR-153a-3p	ucauuuuugugauuugcagcuaguaaucuggcuccaguugcauagucacaaaagugaucgu	ucauuuuugugauuugcagcuaguaaucuggcuccaguugcauagucacaaaagugaucgu	ucauuuuugugauuugcagcuaguaaucuggcuccaguugcauagucacaaaagugaucgu	ucauuuuugugauuugcagcuaguaaucuggcuccaguugcauagucacaaaagugauc	ucauuuuugugauuugcagcuaguaaucuggcuccaguugcauagucacaaaagugauc	ucauuuuugugauuugcagcuaguaaucuggcuccaguugcauagucacaaaagugauc	ucauuuuugugauuugcagcuaguaaucuggcuccaguugcauagucacaaaagugauc	ucauuuuugugauuugcagcuaguaaucuggcuccaguugcauagucacaaaagugauc	ucauuuuugugauuugcagcuaguaaucuggcuccaguugcauagucacaaaagugauc	uugcauagucacaaaagugaucgu	uugcauagucacaaaagugaucgu	uugcauagucacaaaagugaucgu	uugcauagucacaaaagugauc	uugcauagucacaaaagugauc	uugcauagucacaaaagugauc	uugcauagucacaaaagugauc	uugcauagucacaaaagugauc	uugcauagucacaaaagugauc	731	552	789	277	375	210	354	293	148	88.7371	69.9003	80.0106	33.3662	44.88	23.9737	37.3763	32.8066	13.3361
77	cli-miR-153a-5p	ucauuuuugugauuugcagcuaguaaucuggcuccaguugcauagucacaaaagugaucgu	ucauuuuugugauuugcagcuaguaaucuggcuccaguugcauagucacaaaagugaucgu	ucauuuuugugauuugcagcuaguaaucuggcuccaguugcauagucacaaaagugaucgu	ucauuuuugugauuugcagcuaguaaucuggcuccaguugcauagucacaaaagugauc	ucauuuuugugauuugcagcuaguaaucuggcuccaguugcauagucacaaaagugauc	ucauuuuugugauuugcagcuaguaaucuggcuccaguugcauagucacaaaagugauc	ucauuuuugugauuugcagcuaguaaucuggcuccaguugcauagucacaaaagugauc	ucauuuuugugauuugcagcuaguaaucuggcuccaguugcauagucacaaaagugauc	ucauuuuugugauuugcagcuaguaaucuggcuccaguugcauagucacaaaagugauc	ucauuuuugugauuugcagcu	ucauuuuugugauuugcagcu	ucauuuuugugauuugcagcu	ucauuuuugugauuugcagcu	ucauuuuugugauuugcagcu	ucauuuuugugauuugcagcu	ucauuuuugugauuugcagcu	ucauuuuugugauuugcagcu	ucauuuuugugauuugcagcu	26	13	26	1	5	2	6	2	4	3.15617	1.6462	2.6366	0.120455	0.5984	0.228321	0.633497	0.223936	0.360436
78	cli-miR-153b-3p	gucauuuuugugauguugcagcuaguaauaugagcccaguugcauagucacaaaagugauc	gucauuuuugugauguugcagcuaguaauaugagcccaguugcauagucacaaaagugauc	gucauuuuugugauguugcagcuaguaauaugagcccaguugcauagucacaaaagugauc	gucauuuuugugauguugcagcuaguaauaugagcccaguugcauagucacaaaagugauc	gucauuuuugugauguugcagcuaguaauaugagcccaguugcauagucacaaaagugauc	gucauuuuugugauguugcagcuaguaauaugagcccaguugcauagucacaaaagugauc	gucauuuuugugauguugcagcuaguaauaugagcccaguugcauagucacaaaagugauc	gucauuuuugugauguugcagcuaguaauaugagcccaguugcauagucacaaaagugauc	gucauuuuugugauguugcagcuaguaauaugagcccaguugcauagucacaaaagugauc	uugcauagucacaaaagugauc	uugcauagucacaaaagugauc	uugcauagucacaaaagugauc	uugcauagucacaaaagugauc	uugcauagucacaaaagugauc	uugcauagucacaaaagugauc	uugcauagucacaaaagugauc	uugcauagucacaaaagugauc	uugcauagucacaaaagugauc	109	62	104	248	302	123	328	272	109	13.2317	7.85112	10.5464	29.8729	36.1434	14.0417	34.6312	30.4553	9.82187
79	cli-miR-153b-5p	gucauuuuugugauguugcagcuaguaauaugagcccaguugcauagucacaaaagugauc	gucauuuuugugauguugcagcuaguaauaugagcccaguugcauagucacaaaagugauc	gucauuuuugugauguugcagcuaguaauaugagcccaguugcauagucacaaaagugauc	gucauuuuugugauguugcagcuaguaauaugagcccaguugcauagucacaaaagugauc	gucauuuuugugauguugcagcuaguaauaugagcccaguugcauagucacaaaagugauc	gucauuuuugugauguugcagcuaguaauaugagcccaguugcauagucacaaaagugauc	gucauuuuugugauguugcagcuaguaauaugagcccaguugcauagucacaaaagugauc	gucauuuuugugauguugcagcuaguaauaugagcccaguugcauagucacaaaagugauc	gucauuuuugugauguugcagcuaguaauaugagcccaguugcauagucacaaaagugauc	gucauuuuugugauguugcagcu	gucauuuuugugauguugcagcu	gucauuuuugugauguugcagcu	gucauuuuugugauguugcagcu	gucauuuuugugauguugcagcu	gucauuuuugugauguugcagcu	gucauuuuugugauguugcagcu	gucauuuuugugauguugcagcu	gucauuuuugugauguugcagcu	9	1	4	9	55	17	16	9	9	1.09252	0.126631	0.40563	1.0841	6.5824	1.94073	1.68932	1.00771	0.81098
80	cli-miR-1552-3p	uuagugcgcgguaagcuagggugugaguuugcagcacgcuagcugcucugcacuaacu	uuagugcgcgguaagcuagggugugaguuugcagcacgcuagcugcucugcacuaacu	uuagugcgcgguaagcuagggugugaguuugcagcacgcuagcugcucugcacuaacu	uuagugcgcgguaagcuagggugugaguuugcagcacgcuagcugcucugcacuaacu	uuagugcgcgguaagcuagggugugaguuugcagcacgcuagcugcucugcacuaacu	uuagugcgcgguaagcuagggugugaguuugcagcacgcuagcugcucugcacuaacu	uuagugcgcgguaagcuagggugugaguuugcagcacgcuagcugcucugcacuaacu	uuagugcgcgguaagcuagggugugaguuugcagcacgcuagcugcucugcacuaacu	uuagugcgcgguaagcuagggugugaguuugcagcacgcuagcugcucugcacuaacu	cgcuagcugcucugcacuaacu	cgcuagcugcucugcacuaacu	cgcuagcugcucugcacuaacu	cgcuagcugcucugcacuaacu	cgcuagcugcucugcacuaacu	cgcuagcugcucugcacuaacu	cgcuagcugcucugcacuaacu	cgcuagcugcucugcacuaacu	cgcuagcugcucugcacuaacu	87	92	98	45	63	47	7	7	13	10.561	11.65	9.93795	5.42049	7.53984	5.36554	0.73908	0.783776	1.17142
81	cli-miR-1552-5p	uuagugcgcgguaagcuagggugugaguuugcagcacgcuagcugcucugcacuaacu	uuagugcgcgguaagcuagggugugaguuugcagcacgcuagcugcucugcacuaacu	uuagugcgcgguaagcuagggugugaguuugcagcacgcuagcugcucugcacuaacu	uuagugcgcgguaagcuagggugugaguuugcagcacgcuagcugcucugcacuaacu	uuagugcgcgguaagcuagggugugaguuugcagcacgcuagcugcucugcacuaacu	uuagugcgcgguaagcuagggugugaguuugcagcacgcuagcugcucugcacuaacu	uuagugcgcgguaagcuagggugugaguuugcagcacgcuagcugcucugcacuaacu	uuagugcgcgguaagcuagggugugaguuugcagcacgcuagcugcucugcacuaacu	uuagugcgcgguaagcuagggugugaguuugcagcacgcuagcugcucugcacuaacu	uuagugcgcgguaagcuagggug	uuagugcgcgguaagcuagggugu	uuagugcgcgguaagcuagggugu	uuagugcgcgguaagcuagggugu	uuagugcgcgguaagcuagggugu	uuagugcgcgguaagcuagggugu	uuagugcgcgguaagcuagggugu	uuagugcgcgguaagcuagggugu	uuagugcgcgguaagcuagggugu	271	227	344	158	175	172	71	35	66	32.8971	28.7452	34.8842	19.032	20.944	19.6356	7.49638	3.91888	5.94719
82	cli-miR-155-5p	uuaaugcuaaucgugauagggguuuuuaccucugacugacuccuacauauuagcauuaac	uuaaugcuaaucgugauagggguuuuuaccucugacugacuccuacauauuagcauuaaca	uuaaugcuaaucgugauagggguuuuuaccucugacugacuccuacauauuagcauuaaca	uuaaugcuaaucgugauagggguuuuuaccucugacugacuccuacauauuagcauuaaca	uuaaugcuaaucgugauagggguuuuuaccucugacugacuccuacauauuagcauuaaca	uuaaugcuaaucgugauagggguuuuuaccucugacugacuccuacauauuagcauuaaca	uuaaugcuaaucgugauagggguuuuuaccucugacugacuccuacauauuagcauuaaca	uuaaugcuaaucgugauagggguuuuuaccucugacugacuccuacauauuagcauuaaca	uuaaugcuaaucgugauagggguuuuuaccucugacugacuccuacauauuagcauuaaca	uuaaugcuaaucgugauagggguu	uuaaugcuaaucgugauagggguu	uuaaugcuaaucgugauagggguu	uuaaugcuaaucgugauagggguu	uuaaugcuaaucgugauagggguu	uuaaugcuaaucgugauaggggu	uuaaugcuaaucgugauaggggu	uuaaugcuaaucgugauaggggu	uuaaugcuaaucgugauagggguu	27	17	30	11	45	162	44	29	57	3.27757	2.15273	3.04223	1.32501	5.3856	18.494	4.64564	3.24707	5.13621
83	cli-miR-1559-3p	uucgaugcuuguaugcuacucccaagaaugcuaacaggaguuccauguaugcaucgagcag	uucgaugcuuguaugcuacucccaagaaugcuaacaggaguuccauguaugcaucgagca	uucgaugcuuguaugcuacucccaagaaugcuaacaggaguuccauguaugcaucgagcag	uucgaugcuuguaugcuacucccaagaaugcuaacaggaguuccauguaugcaucgagc	uucgaugcuuguaugcuacucccaagaaugcuaacaggaguuccauguaugcaucgagca	uucgaugcuuguaugcuacucccaagaaugcuaacaggaguuccauguaugcaucgagcag	uucgaugcuuguaugcuacucccaagaaugcuaacaggaguuccauguaugcaucgagca	uucgaugcuuguaugcuacucccaagaaugcuaacaggaguuccauguaugcaucgagca	uucgaugcuuguaugcuacucccaagaaugcuaacaggaguuccauguaugcaucgagca	uuccauguaugcaucgagcag	aguuccauguaugcaucgagca	uuccauguaugcaucgagcag	aguuccauguaugcaucgagc	aguuccauguaugcaucgagca	uuccauguaugcaucgagcag	aguuccauguaugcaucgagca	aguuccauguaugcaucgagca	aguuccauguaugcaucgagca	3	0	5	1	0	1	0	0	0	0.364174	0	0.507038	0.120455	0	0.114161	0	0	0
84	cli-miR-1559-5p	uucgaugcuuguaugcuacucccaagaaugcuaacaggaguuccauguaugcaucgagcag	uucgaugcuuguaugcuacucccaagaaugcuaacaggaguuccauguaugcaucgagca	uucgaugcuuguaugcuacucccaagaaugcuaacaggaguuccauguaugcaucgagcag	uucgaugcuuguaugcuacucccaagaaugcuaacaggaguuccauguaugcaucgagc	uucgaugcuuguaugcuacucccaagaaugcuaacaggaguuccauguaugcaucgagca	uucgaugcuuguaugcuacucccaagaaugcuaacaggaguuccauguaugcaucgagcag	uucgaugcuuguaugcuacucccaagaaugcuaacaggaguuccauguaugcaucgagca	uucgaugcuuguaugcuacucccaagaaugcuaacaggaguuccauguaugcaucgagca	uucgaugcuuguaugcuacucccaagaaugcuaacaggaguuccauguaugcaucgagca	uucgaugcuuguaugcuacucc	uucgaugcuuguaugcuacucc	uucgaugcuuguaugcuacucc	uucgaugcuuguaugcuacucc	uucgaugcuuguaugcuacucc	uucgaugcuuguaugcuacucc	uucgaugcuuguaugcuacucc	uucgaugcuuguaugcuacucc	uucgaugcuuguaugcuacucc	3611	2140	2941	1032	2057	1396	990	1095	766	438.344	270.99	298.24	124.31	246.182	159.368	104.527	122.605	69.0234
85	cli-miR-15a-3p	uagcagcacauaaugguuuguggguuuugaaaaggugcaggccauauugugcugccuca	uagcagcacauaaugguuuguggguuuugaaaaggugcaggccauauugugcugccuca	uagcagcacauaaugguuuguggguuuugaaaaggugcaggccauauugugcugccuca	uagcagcacauaaugguuuguggguuuugaaaaggugcaggccauauugugcugccuca	uagcagcacauaaugguuuguggguuuugaaaaggugcaggccauauugugcugccuca	uagcagcacauaaugguuuguggguuuugaaaaggugcaggccauauugugcugccuca	uagcagcacauaaugguuuguggguuuugaaaaggugcaggccauauugugcugccuca	uagcagcacauaaugguuuguggguuuugaaaaggugcaggccauauugugcugccuca	uagcagcacauaaugguuuguggguuuugaaaaggugcaggccauauugugcugccuca	caggccauauugugcugccuca	caggccauauugugcugccuca	caggccauauugugcugccuca	caggccauauugugcugccuca	caggccauauugugcugccuca	caggccauauugugcugccuca	caggccauauugugcugccuca	caggccauauugugcugccuca	caggccauauugugcugccuca	22	15	21	23	14	17	14	15	5	2.67061	1.89946	2.12956	2.77047	1.67552	1.94073	1.47816	1.67952	0.450545
86	cli-miR-15a-5p	uagcagcacauaaugguuuguggguuuugaaaaggugcaggccauauugugcugccuca	uagcagcacauaaugguuuguggguuuugaaaaggugcaggccauauugugcugccuca	uagcagcacauaaugguuuguggguuuugaaaaggugcaggccauauugugcugccuca	uagcagcacauaaugguuuguggguuuugaaaaggugcaggccauauugugcugccuca	uagcagcacauaaugguuuguggguuuugaaaaggugcaggccauauugugcugccuca	uagcagcacauaaugguuuguggguuuugaaaaggugcaggccauauugugcugccuca	uagcagcacauaaugguuuguggguuuugaaaaggugcaggccauauugugcugccuca	uagcagcacauaaugguuuguggguuuugaaaaggugcaggccauauugugcugccuca	uagcagcacauaaugguuuguggguuuugaaaaggugcaggccauauugugcugccuca	uagcagcacauaaugguuugu	uagcagcacauaaugguuugu	uagcagcacauaaugguuugu	uagcagcacauaaugguuugu	uagcagcacauaaugguuugu	uagcagcacauaaugguuugu	uagcagcacauaaugguuugu	uagcagcacauaaugguuugu	uagcagcacauaaugguuugu	5960	3977	4563	6609	8977	9002	4008	4471	3194	723.492	503.611	462.723	796.09	1074.37	1027.67	423.176	500.609	287.808
87	cli-miR-15b-3p	uagcagcacaucaugguuugcaugcucuaauaaagaugcgaaucauuauuugcugcuuua	uagcagcacaucaugguuugcaugcucuaauaaagaugcgaaucauuauuugcugcuuu	uagcagcacaucaugguuugcaugcucuaauaaagaugcgaaucauuauuugcugcuuua	uagcagcacaucaugguuugcaugcucuaauaaagaugcgaaucauuauuugcugcuuua	uagcagcacaucaugguuugcaugcucuaauaaagaugcgaaucauuauuugcugcuuua	uagcagcacaucaugguuugcaugcucuaauaaagaugcgaaucauuauuugcugcuuua	uagcagcacaucaugguuugcaugcucuaauaaagaugcgaaucauuauuugcugcuuua	uagcagcacaucaugguuugcaugcucuaauaaagaugcgaaucauuauuugcugcuuua	uagcagcacaucaugguuugcaugcucuaauaaagaugcgaaucauuauuugcugcuuu	cgaaucauuauuugcugcuuua	cgaaucauuauuugcugcuuu	cgaaucauuauuugcugcuuua	cgaaucauuauuugcugcuuua	cgaaucauuauuugcugcuuua	cgaaucauuauuugcugcuuua	aaucauuauuugcugcuuua	cgaaucauuauuugcugcuuua	cgaaucauuauuugcugcuuu	29	10	20	6	5	13	0	2	4	3.52035	1.26631	2.02815	0.722733	0.5984	1.48409	0	0.223936	0.360436
88	cli-miR-15b-5p	uagcagcacaucaugguuugcaugcucuaauaaagaugcgaaucauuauuugcugcuuua	uagcagcacaucaugguuugcaugcucuaauaaagaugcgaaucauuauuugcugcuuu	uagcagcacaucaugguuugcaugcucuaauaaagaugcgaaucauuauuugcugcuuua	uagcagcacaucaugguuugcaugcucuaauaaagaugcgaaucauuauuugcugcuuua	uagcagcacaucaugguuugcaugcucuaauaaagaugcgaaucauuauuugcugcuuua	uagcagcacaucaugguuugcaugcucuaauaaagaugcgaaucauuauuugcugcuuua	uagcagcacaucaugguuugcaugcucuaauaaagaugcgaaucauuauuugcugcuuua	uagcagcacaucaugguuugcaugcucuaauaaagaugcgaaucauuauuugcugcuuua	uagcagcacaucaugguuugcaugcucuaauaaagaugcgaaucauuauuugcugcuuu	uagcagcacaucaugguuug	uagcagcacaucaugguuug	uagcagcacaucaugguuug	uagcagcacaucaugguuug	uagcagcacaucaugguuug	uagcagcacaucaugguuug	uagcagcacaucaugguuug	uagcagcacaucaugguuug	uagcagcacaucaugguuug	1963	1311	1019	1937	2803	3295	982	1410	687	238.291	166.013	103.334	233.322	335.463	376.159	103.682	157.875	61.9048
89	cli-miR-15c-3p	uagcagcacaucaugguuuguagggacaaggagauacagaccauucugggcugccuca	uagcagcacaucaugguuuguagggacaaggagauacagaccauucugggcugccuca	uagcagcacaucaugguuuguagggacaaggagauacagaccauucugggcugccuca	uagcagcacaucaugguuuguagggacaaggagauacagaccauucugggcugccucau	uagcagcacaucaugguuuguagggacaaggagauacagaccauucugggcugccucau	uagcagcacaucaugguuuguagggacaaggagauacagaccauucugggcugccuca	uagcagcacaucaugguuuguagggacaaggagauacagaccauucugggcugccuca	uagcagcacaucaugguuuguagggacaaggagauacagaccauucugggcugccuca	uagcagcacaucaugguuuguagggacaaggagauacagaccauucugggcugccuca	cagaccauucugggcugccuca	cagaccauucugggcugccuca	cagaccauucugggcugccuca	cagaccauucugggcugccucau	cagaccauucugggcugccucau	cagaccauucugggcugccuca	cagaccauucugggcugccuca	cagaccauucugggcugccuca	agaccauucugggcugccuca	70	29	49	6	4	2	1	3	0	8.49739	3.6723	4.96897	0.722733	0.47872	0.228321	0.105583	0.335904	0
90	cli-miR-15c-5p	uagcagcacaucaugguuuguagggacaaggagauacagaccauucugggcugccuca	uagcagcacaucaugguuuguagggacaaggagauacagaccauucugggcugccuca	uagcagcacaucaugguuuguagggacaaggagauacagaccauucugggcugccuca	uagcagcacaucaugguuuguagggacaaggagauacagaccauucugggcugccucau	uagcagcacaucaugguuuguagggacaaggagauacagaccauucugggcugccucau	uagcagcacaucaugguuuguagggacaaggagauacagaccauucugggcugccuca	uagcagcacaucaugguuuguagggacaaggagauacagaccauucugggcugccuca	uagcagcacaucaugguuuguagggacaaggagauacagaccauucugggcugccuca	uagcagcacaucaugguuuguagggacaaggagauacagaccauucugggcugccuca	uagcagcacaucaugguuugua	uagcagcacaucaugguuugua	uagcagcacaucaugguuugua	uagcagcacaucaugguuugu	uagcagcacaucaugguuugu	uagcagcacaucaugguuugu	uagcagcacaucaugguuugu	uagcagcacaucaugguuugu	uagcagcacaucaugguuugu	27210	16766	16298	6817	12868	11052	3055	3968	2382	3303.06	2123.09	1652.74	821.145	1540.04	1261.7	322.555	444.289	214.639
91	cli-miR-1641-5p	ugaggauuaaugacugucuggggucaucaucuccucccaguuaguuauuaauccccagg	ugaggauuaaugacugucuggggucaucaucuccucccaguuaguuauuaauccccagg	ugaggauuaaugacugucuggggucaucaucuccucccaguuaguuauuaauccccagg	null	ugaggauuaaugacugucuggggucaucaucuccucccaguuaguuauuaauccccaggaa	null	null	null	null	ugaggauuaaugacugucuggg	ugaggauuaaugacugucuggg	ugaggauuaaugacugucuggg	null	ugaggauuaaugacugucuggg	null	null	null	null	6	3	5	0	3	0	0	0	0	0.728348	0.379893	0.507038	0	0.35904	0	0	0	0
92	cli-miR-1662-3p	uugacaucaucauacuugggauguaugacacaaagucccaagcaggcugaugucaggc	uugacaucaucauacuugggauguaugacacaaagucccaagcaggcugaugucaggc	uugacaucaucauacuugggauguaugacacaaagucccaagcaggcugaugucaggc	uugacaucaucauacuugggauguaugacacaaagucccaagcaggcugaugucaggc	uugacaucaucauacuugggauguaugacacaaagucccaagcaggcugaugucaggc	uugacaucaucauacuugggauguaugacacaaagucccaagcaggcugaugucaggc	uugacaucaucauacuugggauguaugacacaaagucccaagcaggcugaugucaggc	uugacaucaucauacuugggauguaugacacaaagucccaagcaggcugaugucaggc	uugacaucaucauacuugggauguaugacacaaagucccaagcaggcugaugucaggc	ucccaagcaggcugaugucaggc	ucccaagcaggcugaugucaggc	ucccaagcaggcugaugucaggc	ucccaagcaggcugaugucaggc	ucccaagcaggcugaugucaggc	ucccaagcaggcugaugucaggc	ucccaagcaggcugaugucaggc	cccaagcaggcugaugucaggc	ucccaagcaggcugaugucaggc	3	2	1	2	4	2	4	0	2	0.364174	0.253262	0.101408	0.240911	0.47872	0.228321	0.422331	0	0.180218
93	cli-miR-1662-5p	uugacaucaucauacuugggauguaugacacaaagucccaagcaggcugaugucaggc	uugacaucaucauacuugggauguaugacacaaagucccaagcaggcugaugucaggc	uugacaucaucauacuugggauguaugacacaaagucccaagcaggcugaugucaggc	uugacaucaucauacuugggauguaugacacaaagucccaagcaggcugaugucaggc	uugacaucaucauacuugggauguaugacacaaagucccaagcaggcugaugucaggc	uugacaucaucauacuugggauguaugacacaaagucccaagcaggcugaugucaggc	uugacaucaucauacuugggauguaugacacaaagucccaagcaggcugaugucaggc	uugacaucaucauacuugggauguaugacacaaagucccaagcaggcugaugucaggc	uugacaucaucauacuugggauguaugacacaaagucccaagcaggcugaugucaggc	uugacaucaucauacuugggau	uugacaucaucauacuugggau	uugacaucaucauacuugggau	uugacaucaucauacuugggau	uugacaucaucauacuugggau	uugacaucaucauacuugggau	uugacaucaucauacuugggau	uugacaucaucauacuugggau	uugacaucaucauacuugggau	1660	1571	1472	541	1139	1006	262	184	187	201.51	198.937	149.272	65.1664	136.316	114.845	27.6627	20.6021	16.8504
94	cli-miR-1677-3p	uccugcaccgcugaagucaauggaaguuuugucauugacuucaauaggagcaggauu	uccugcaccgcugaagucaauggaaguuuugucauugacuucaauaggagcaggauu	uccugcaccgcugaagucaauggaaguuuugucauugacuucaauaggagcaggauu	uccugcaccgcugaagucaauggaaguuuugucauugacuucaauaggagcaggauu	uccugcaccgcugaagucaauggaaguuuugucauugacuucaauaggagcaggauu	uccugcaccgcugaagucaauggaaguuuugucauugacuucaauaggagcaggauu	null	uccugcaccgcugaagucaauggaaguuuugucauugacuucaauaggagcaggauu	uccugcaccgcugaagucaauggaaguuuugucauugacuucaauaggagcaggauu	uugacuucaauaggagcaggauu	uugacuucaauaggagcaggauu	uugacuucaauaggagcaggauu	uugacuucaauaggagcaggauu	uugacuucaauaggagcaggauu	uugacuucaauaggagcaggauu	null	uugacuucaauaggagcaggauu	uugacuucaauaggagcaggauu	466	283	449	85	53	92	0	26	32	56.5684	35.8365	45.532	10.2387	6.34304	10.5028	0	2.91117	2.88349
95	cli-miR-1677-5p	uccugcaccgcugaagucaauggaaguuuugucauugacuucaauaggagcaggauu	uccugcaccgcugaagucaauggaaguuuugucauugacuucaauaggagcaggauu	uccugcaccgcugaagucaauggaaguuuugucauugacuucaauaggagcaggauu	uccugcaccgcugaagucaauggaaguuuugucauugacuucaauaggagcaggauu	uccugcaccgcugaagucaauggaaguuuugucauugacuucaauaggagcaggauu	uccugcaccgcugaagucaauggaaguuuugucauugacuucaauaggagcaggauu	null	uccugcaccgcugaagucaauggaaguuuugucauugacuucaauaggagcaggauu	uccugcaccgcugaagucaauggaaguuuugucauugacuucaauaggagcaggauu	uccugcaccgcugaagucaaug	uccugcaccgcugaagucaaug	uccugcaccgcugaagucaaug	uccugcaccgcugaagucaaug	uccugcaccgcugaagucaaug	uccugcaccgcugaagucaaug	null	uccugcaccgcugaaguca	uccugcaccgcugaagucaau	80	45	51	9	15	10	0	3	3	9.71131	5.69839	5.17179	1.0841	1.7952	1.14161	0	0.335904	0.270327
96	cli-miR-16a-3p	uagcagcacguaaauauugguguuaagacuguaaauaucuccaguauuaacugugcugcug	uagcagcacguaaauauugguguuaagacuguaaauaucuccaguauuaacugugcugcugaa	uagcagcacguaaauauugguguuaagacuguaaauaucuccaguauuaacugugcugcugaa	uagcagcacguaaauauugguguuaagacuguaaauaucuccaguauuaacugugcugcuga	uagcagcacguaaauauugguguaguaaaauaaaccuuaaaccccaauauuauugugcugcuu	uagcagcacguaaauauugguguaguaaaauaaaccuuaaaccccaauauuauugugcugcuu	uagcagcacguaaauauugguguuaagacuguaaauaucuccaguauuaacugugcugcug	uagcagcacguaaauauugguguuaagacuguaaauaucuccaguauuaacugugcugcuga	uagcagcacguaaauauugguguuaagacuguaaauaucuccaguauuaacugugcugcug	cuccaguauuaacugugcugcug	ccaguauuaacugugcugcugaa	ccaguauuaacugugcugcugaa	ccaguauuaacugugcugcuga	cccaauauuauugugcugcuu	cccaauauuauugugcugcuu	cuccaguauuaacugugcugcug	cuccaguauuaacugugcugcuga	cuccaguauuaacugugcugcug	23	20	27	31	140	53	15	9	12	2.792	2.53262	2.73801	3.73412	16.7552	6.05051	1.58374	1.00771	1.08131
97	cli-miR-16a-5p	uagcagcacguaaauauugguguuaagacuguaaauaucuccaguauuaacugugcugcug	uagcagcacguaaauauugguguuaagacuguaaauaucuccaguauuaacugugcugcugaa	uagcagcacguaaauauugguguuaagacuguaaauaucuccaguauuaacugugcugcugaa	uagcagcacguaaauauugguguuaagacuguaaauaucuccaguauuaacugugcugcuga	uagcagcacguaaauauugguguaguaaaauaaaccuuaaaccccaauauuauugugcugcuu	uagcagcacguaaauauugguguaguaaaauaaaccuuaaaccccaauauuauugugcugcuu	uagcagcacguaaauauugguguuaagacuguaaauaucuccaguauuaacugugcugcug	uagcagcacguaaauauugguguuaagacuguaaauaucuccaguauuaacugugcugcuga	uagcagcacguaaauauugguguuaagacuguaaauaucuccaguauuaacugugcugcug	uagcagcacguaaauauuggug	uagcagcacguaaauauuggug	uagcagcacguaaauauuggug	uagcagcacguaaauauuggug	uagcagcacguaaauauuggug	uagcagcacguaaauauuggug	uagcagcacguaaauauuggug	uagcagcacguaaauauuggug	uagcagcacguaaauauuggug	23466	16280	23884	26835	33252	68496	13205	8292	9107	2848.57	2061.55	2422.02	3232.42	3979.6	7819.54	1394.22	928.438	820.622
98	cli-miR-16b-3p	uagcagcacguaaauacuggaguuuaggauugccuguugcucuccaguauugcauugcugcuuua	uagcagcacguaaauacuggaguuuaggauugccuguugcucuccaguauugcauugcugcuuua	uagcagcacguaaauacuggaguuuaggauugccuguugcucuccaguauugcauugcugcuuu	uagcagcacguaaauacuggaguuuaggauugccuguugcucuccaguauugcauugcugcuuu	uagcagcacguaaauacuggaguuuaggauugccuguugcucuccaguauugcauugcugcuuu	uagcagcacguaaauacuggaguuuaggauugccuguugcucuccaguauugcauugcugcuu	uagcagcacguaaauacuggaguuuaggauugccuguugcucuccaguauugcauugcugcuuua	uagcagcacguaaauacuggaguuuaggauugccuguugcucuccaguauugcauugcugcuuua	uagcagcacguaaauacuggaguuuaggauugccuguugcucuccaguauugcauugcugcuuua	ccaguauugcauugcugcuuua	ccaguauugcauugcugcuuua	uccaguauugcauugcugcuuu	uccaguauugcauugcugcuuu	uccaguauugcauugcugcuuu	uccaguauugcauugcugcuu	ccaguauugcauugcugcuuua	ccaguauugcauugcugcuuua	ccaguauugcauugcugcuuua	18	17	13	4	10	1	0	0	1	2.18504	2.15273	1.3183	0.481822	1.1968	0.114161	0	0	0.0901089
99	cli-miR-16b-5p	uagcagcacguaaauacuggaguuuaggauugccuguugcucuccaguauugcauugcugcuuua	uagcagcacguaaauacuggaguuuaggauugccuguugcucuccaguauugcauugcugcuuua	uagcagcacguaaauacuggaguuuaggauugccuguugcucuccaguauugcauugcugcuuu	uagcagcacguaaauacuggaguuuaggauugccuguugcucuccaguauugcauugcugcuuu	uagcagcacguaaauacuggaguuuaggauugccuguugcucuccaguauugcauugcugcuuu	uagcagcacguaaauacuggaguuuaggauugccuguugcucuccaguauugcauugcugcuu	uagcagcacguaaauacuggaguuuaggauugccuguugcucuccaguauugcauugcugcuuua	uagcagcacguaaauacuggaguuuaggauugccuguugcucuccaguauugcauugcugcuuua	uagcagcacguaaauacuggaguuuaggauugccuguugcucuccaguauugcauugcugcuuua	uagcagcacguaaauacuggag	uagcagcacguaaauacuggag	uagcagcacguaaauacuggag	uagcagcacguaaauacuggag	uagcagcacguaaauacuggag	uagcagcacguaaauacuggag	uagcagcacguaaauacuggag	uagcagcacguaaauacuggag	uagcagcacguaaauacuggag	9831	8335	10562	3217	5280	6273	1384	1112	1015	1193.4	1055.47	1071.07	387.505	631.911	716.129	146.127	124.508	91.4605
100	cli-miR-1729-3p	aucccuuacucacgugagcagucgucucuauuucacgggacuacucggugaguaaggaucgc	aucccuuacucacgugagcagucgucucuauuucacgggacuacucggugaguaaggaucgc	aucccuuacucacgugagcagucgucucuauuucacgggacuacucggugaguaaggaucgca	aucccuuacucacgugagcagucgucucuauuucacgggacuacucggugaguaaggaucgc	aucccuuacucacgugagcagucgucucuauuucacgggacuacucggugaguaaggaucgca	aucccuuacucacgugagcagucgucucuauuucacgggacuacucggugaguaaggaucgca	aucccuuacucacgugagcagucgucucuauuucacgggacuacucggugaguaaggaucgca	aucccuuacucacgugagcagucgucucuauuucacgggacuacucggugaguaaggaucgca	aucccuuacucacgugagcagucgucucuauuucacgggacuacucggugaguaaggaucgca	cuacucggugaguaaggaucgc	cuacucggugaguaaggaucgc	cuacucggugaguaaggaucgca	cuacucggugaguaaggaucgc	cuacucggugaguaaggaucgca	cuacucggugaguaaggaucgca	cuacucggugaguaaggaucgca	cuacucggugaguaaggaucgca	cuacucggugaguaaggaucgca	42	31	36	71	63	39	13	12	4	5.09844	3.92556	3.65067	8.55234	7.53984	4.45226	1.37258	1.34362	0.360436
101	cli-miR-1729-5p	aucccuuacucacgugagcagucgucucuauuucacgggacuacucggugaguaaggaucgc	aucccuuacucacgugagcagucgucucuauuucacgggacuacucggugaguaaggaucgc	aucccuuacucacgugagcagucgucucuauuucacgggacuacucggugaguaaggaucgca	aucccuuacucacgugagcagucgucucuauuucacgggacuacucggugaguaaggaucgc	aucccuuacucacgugagcagucgucucuauuucacgggacuacucggugaguaaggaucgca	aucccuuacucacgugagcagucgucucuauuucacgggacuacucggugaguaaggaucgca	aucccuuacucacgugagcagucgucucuauuucacgggacuacucggugaguaaggaucgca	aucccuuacucacgugagcagucgucucuauuucacgggacuacucggugaguaaggaucgca	aucccuuacucacgugagcagucgucucuauuucacgggacuacucggugaguaaggaucgca	aucccuuacucacgugagcaguc	aucccuuacucacgugagcagu	aucccuuacucacgugagcaguc	aucccuuacucacgugagcagu	aucccuuacucacgugagcaguc	aucccuuacucacgugagcaguc	aucccuuacucacgugagcag	aucccuuacucacgugagcagu	aucccuuacucacgugagcag	32	31	30	31	37	44	14	4	9	3.88452	3.92556	3.04223	3.73412	4.42816	5.02306	1.47816	0.447872	0.81098
102	cli-miR-17-3p	caaagugcuuacagugcagguagugauauauagaaccuacugcagugaaggcacuuguagc	caaagugcuuacagugcagguagugauauauagaaccuacugcagugaaggcacuuguag	caaagugcuuacagugcagguagugauauauagaaccuacugcagugaaggcacuuguagc	caaagugcuuacagugcagguagugauauauagaaccuacugcagugaaggcacuuguagc	caaagugcuuacagugcagguagugauauauagaaccuacugcagugaaggcacuuguagc	caaagugcuuacagugcagguagugauauauagaaccuacugcagugaaggcacuuguagc	caaagugcuuacagugcagguagugauauauagaaccuacugcagugaaggcacuuguagc	caaagugcuuacagugcagguagugauauauagaaccuacugcagugaaggcacuugua	caaagugcuuacagugcagguagugauauauagaaccuacugcagugaaggcacuuguagc	acugcagugaaggcacuuguagc	acugcagugaaggcacuuguag	acugcagugaaggcacuuguagc	acugcagugaaggcacuuguagc	acugcagugaaggcacuuguagc	acugcagugaaggcacuuguagc	acugcagugaaggcacuuguagc	acugcagugaaggcacuugua	acugcagugaaggcacuuguagc	546	375	595	224	314	206	131	117	136	66.2797	47.4866	60.3375	26.982	37.5795	23.5171	13.8313	13.1003	12.2548
103	cli-miR-1756b-3p	agcugauguaaauuaggagagcucugucaauguuaaacgcuuuccugauuuacuccagcuga	agcugauguaaauuaggagagcucugucaauguuaaacgcuuuccugauuuacuccagcuga	agcugauguaaauuaggagagcucugucaauguuaaacgcuuuccugauuuacuccagcuga	agcugauguaaauuaggagagcucugucaauguuaaacgcuuuccugauuuacuccagcuga	agcugauguaaauuaggagagcucugucaauguuaaacgcuuuccugauuuacuccagcuga	agcugauguaaauuaggagagcucugucaauguuaaacgcuuuccugauuuacuccagcuga	agcugauguaaauuaggagagcucugucaauguuaaacgcuuuccugauuuacuccagcuga	agcugauguaaauuaggagagcucugucaauguuaaacgcuuuccugauuuacuccagcuga	agcugauguaaauuaggagagcucugucaauguuaaacgcuuuccugauuuacuccagcuga	uuuccugauuuacuccagcuga	uuuccugauuuacuccagcuga	uuuccugauuuacuccagcuga	uuuccugauuuacuccagcuga	uuuccugauuuacuccagcuga	uuuccugauuuacuccagcuga	uuuccugauuuacuccagcuga	uuuccugauuuacuccagcuga	uuuccugauuuacuccagcuga	51	15	12	41	44	113	154	61	48	6.19096	1.89946	1.21689	4.93867	5.26592	12.9001	16.2598	6.83005	4.32523
104	cli-miR-1756b-5p	agcugauguaaauuaggagagcucugucaauguuaaacgcuuuccugauuuacuccagcuga	agcugauguaaauuaggagagcucugucaauguuaaacgcuuuccugauuuacuccagcuga	agcugauguaaauuaggagagcucugucaauguuaaacgcuuuccugauuuacuccagcuga	agcugauguaaauuaggagagcucugucaauguuaaacgcuuuccugauuuacuccagcuga	agcugauguaaauuaggagagcucugucaauguuaaacgcuuuccugauuuacuccagcuga	agcugauguaaauuaggagagcucugucaauguuaaacgcuuuccugauuuacuccagcuga	agcugauguaaauuaggagagcucugucaauguuaaacgcuuuccugauuuacuccagcuga	agcugauguaaauuaggagagcucugucaauguuaaacgcuuuccugauuuacuccagcuga	agcugauguaaauuaggagagcucugucaauguuaaacgcuuuccugauuuacuccagcuga	agcugauguaaauuaggagagc	agcugauguaaauuaggagagc	agcugauguaaauuaggagagc	agcugauguaaauuaggagagc	agcugauguaaauuaggagagc	agcugauguaaauuaggagag	agcugauguaaauuaggagagc	agcugauguaaauuaggagagc	agcugauguaaauuaggagagc	0	0	1	0	0	1	0	0	0	0	0	0.101408	0	0	0.114161	0	0	0
105	cli-miR-17-5p	caaagugcuuacagugcagguagugauauauagaaccuacugcagugaaggcacuuguagc	caaagugcuuacagugcagguagugauauauagaaccuacugcagugaaggcacuuguag	caaagugcuuacagugcagguagugauauauagaaccuacugcagugaaggcacuuguagc	caaagugcuuacagugcagguagugauauauagaaccuacugcagugaaggcacuuguagc	caaagugcuuacagugcagguagugauauauagaaccuacugcagugaaggcacuuguagc	caaagugcuuacagugcagguagugauauauagaaccuacugcagugaaggcacuuguagc	caaagugcuuacagugcagguagugauauauagaaccuacugcagugaaggcacuuguagc	caaagugcuuacagugcagguagugauauauagaaccuacugcagugaaggcacuugua	caaagugcuuacagugcagguagugauauauagaaccuacugcagugaaggcacuuguagc	caaagugcuuacagugcagguag	caaagugcuuacagugcagguag	caaagugcuuacagugcagguag	caaagugcuuacagugcagguagu	caaagugcuuacagugcagguagu	caaagugcuuacagugcagguagu	caaagugcuuacagugcagguagu	caaagugcuuacagugcagguagu	caaagugcuuacagugcagguagu	9080	6342	12022	3679	7018	5094	2293	1765	2179	1102.23	803.093	1219.12	443.156	839.915	581.534	242.101	197.623	196.347
106	cli-miR-1782-3p	gcccuucuccaaaugaauuuuuaauauaaaauaauuaaacauucauuggagcagggaca	cccuucuccaaaugaauuuuuaauauaaaauaauuaaacauucauuggagcagggac	cccuucuccaaaugaauuuuuaauauaaaauaauuaaacauucauuggagcagggac	gcccuucuccaaaugaauuuuuaauauaaaauaauuaaacauucauuggagcagggaca	cccuucuccaaaugaauuuuuaauauaaaauaauuaaacauucauuggagcagggac	gcccuucuccaaaugaauuuuuaauauaaaauaauuaaacauucauuggagcagggaca	cccuucuccaaaugaauuuuuaauauaaaauaauuaaacauucauuggagcagggac	cccuucuccaaaugaauuuuuaauauaaaauaauuaaacauucauuggagcagggac	gcccuucuccaaaugaauuuuuaauauaaaauaauuaaacauucauuggagcagggacag	acauucauuggagcagggaca	acauucauuggagcagggac	acauucauuggagcagggac	acauucauuggagcagggaca	aaacauucauuggagcagggac	acauucauuggagcagggaca	aaacauucauuggagcagggac	aaacauucauuggagcagggac	acauucauuggagcagggacag	12	8	11	15	19	33	16	18	25	1.4567	1.01305	1.11548	1.80683	2.27392	3.7673	1.68932	2.01542	2.25272
107	cli-miR-1784-3p	null	null	uucugcucuuauugaaaucagugagaguucugccauugacuuaaaugggagcagaauu	null	null	null	null	null	null	null	null	ugacuuaaaugggagcagaauu	null	null	null	null	null	null	0	0	3	0	0	0	0	0	0	0	0	0.304223	0	0	0	0	0	0
108	cli-miR-1784-5p	null	null	uucugcucuuauugaaaucagugagaguucugccauugacuuaaaugggagcagaauu	null	null	null	null	null	null	null	null	uucugcucuuauugaaaucagu	null	null	null	null	null	null	0	0	3	0	0	0	0	0	0	0	0	0.304223	0	0	0	0	0	0
109	cli-miR-1788-3p	gggcuuguuuuccguugccugcgguuuguuccagugacucaggcagcgaaagcaagucugg	null	null	null	null	null	null	null	null	caggcagcgaaagcaagucugg	null	null	null	null	null	null	null	null	9	0	0	0	0	0	0	0	0	1.09252	0	0	0	0	0	0	0	0
110	cli-miR-1803-3p	agagcccauuguagucaaugggagucuuuuuccauugacuucagugggguuuga	null	agagcccauuguagucaaugggagucuuuuuccauugacuucagugggguuuga	null	null	null	null	null	null	auugacuucagugggguuuga	null	auugacuucagugggguuuga	null	null	null	null	null	null	7	0	9	0	0	0	0	0	0	0.849739	0	0.912668	0	0	0	0	0	0
111	cli-miR-1803-5p	agagcccauuguagucaaugggagucuuuuuccauugacuucagugggguuuga	null	agagcccauuguagucaaugggagucuuuuuccauugacuucagugggguuuga	null	null	null	null	null	null	agagcccauuguagucaaugg	null	agagcccauuguagucaaugg	null	null	null	null	null	null	4	0	0	0	0	0	0	0	0	0.485565	0	0	0	0	0	0	0	0
112	cli-miR-1805-3p	aguuguagucuuucaaacagagcuucgcaaggacauaccuguauuggaacacuacagcu	aguuguagucuuucaaacagagcuucgcaaggacauaccuguauuggaacacuacagcu	aguuguagucuuucaaacagagcuucgcaaggacauaccuguauuggaacacuacagcu	aguuguagucuuucaaacagagcuucgcaaggacauaccuguauuggaacacuacagcucc	null	null	null	null	null	uguauuggaacacuacagcu	uguauuggaacacuacagcu	uguauuggaacacuacagcu	uguauuggaacacuacagcucc	null	null	null	null	null	319	238	266	2	0	0	0	0	0	38.7238	30.1382	26.9744	0.240911	0	0	0	0	0
113	cli-miR-1805-5p	aguuguagucuuucaaacagagcuucgcaaggacauaccuguauuggaacacuacagcu	aguuguagucuuucaaacagagcuucgcaaggacauaccuguauuggaacacuacagcu	aguuguagucuuucaaacagagcuucgcaaggacauaccuguauuggaacacuacagcu	aguuguagucuuucaaacagagcuucgcaaggacauaccuguauuggaacacuacagcucc	null	null	null	null	null	aguuguagucuuucaaacaga	aguuguagucuuucaaacaga	aguuguagucuuucaaacaga	aguuguagucuuucaaacaga	null	null	null	null	null	19	20	23	0	0	0	0	0	0	2.30644	2.53262	2.33237	0	0	0	0	0	0
114	cli-miR-181a-3p	aacauucaacgcugucggugaguuuggaauuaaagugaaaaccaucgaccguugauuguacc	aacauucaacgcugucggugaguuuggaauuaaagugaaaaccaucgaccguugauuguacc	aacauucaacgcugucggugaguuuggaauuaaagugaaaaccaucgaccguugauuguacc	aacauucaacgcugucggugaguuuggaauuaaagugaaaaccaucgaccguugauuguacc	aacauucaacgcugucggugaguuuggaauuaaagugaaaaccaucgaccguugauuguacc	aacauucaacgcugucggugaguuuggaauuaaagugaaaaccaucgaccguugauuguacc	aacauucaacgcugucggugaguuuggaauuaaagugaaaaccaucgaccguugauuguacc	aacauucaacgcugucggugaguuuggaauuaaagugaaaaccaucgaccguugauuguacc	aacauucaacgcugucggugaguuuggaauuaaagugaaaaccaucgaccguugauuguacc	accaucgaccguugauuguacc	accaucgaccguugauuguacc	accaucgaccguugauuguacc	accaucgaccguugauuguacc	accaucgaccguugauuguacc	accaucgaccguugauuguacc	accaucgaccguugauuguacc	accaucgaccguugauuguacc	accaucgaccguugauuguacc	4753	2684	3721	1194	1894	1919	520	1131	606	576.973	339.877	377.338	143.824	226.674	219.074	54.9031	126.636	54.606
115	cli-miR-181a-5p	aacauucaacgcugucggugaguuuggaauuaaagugaaaaccaucgaccguugauuguacc	aacauucaacgcugucggugaguuuggaauuaaagugaaaaccaucgaccguugauuguacc	aacauucaacgcugucggugaguuuggaauuaaagugaaaaccaucgaccguugauuguacc	aacauucaacgcugucggugaguuuggaauuaaagugaaaaccaucgaccguugauuguacc	aacauucaacgcugucggugaguuuggaauuaaagugaaaaccaucgaccguugauuguacc	aacauucaacgcugucggugaguuuggaauuaaagugaaaaccaucgaccguugauuguacc	aacauucaacgcugucggugaguuuggaauuaaagugaaaaccaucgaccguugauuguacc	aacauucaacgcugucggugaguuuggaauuaaagugaaaaccaucgaccguugauuguacc	aacauucaacgcugucggugaguuuggaauuaaagugaaaaccaucgaccguugauuguacc	aacauucaacgcugucggugagu	aacauucaacgcugucggugagu	aacauucaacgcugucggugagu	aacauucaacgcugucggugagu	aacauucaacgcugucggugagu	aacauucaacgcugucggugagu	aacauucaacgcugucggugagu	aacauucaacgcugucggugagu	aacauucaacgcugucggugagu	620924	487826	819145	241047	321746	467609	75551	67979	74277	75374.8	61773.9	83067.5	29035.4	38506.6	53382.5	7976.89	7611.47	6693.02
116	cli-miR-181b-3p	aacauucauugcugucgguggguuuucuuuucugucaacucacugaucaaugaaugca	aacauucauugcugucgguggguuuucuuuucugucaacucacugaucaaugaaugca	aacauucauugcugucgguggguuuucuuuucugucaacucacugaucaaugaaugca	aacauucauugcugucgguggguuuucuuuucugucaacucacugaucaaugaaugcaaa	aacauucauugcugucgguggguuuucuuuucugucaacucacugaucaaugaaugca	aacauucauugcugucgguggguuuucuuuucugucaacucacugaucaaugaaugc	aacauucauugcugucgguggguuuucuuuucugucaacucacugaucaaugaaugca	aacauucauugcugucgguggguuuucuuuucugucaacucacugaucaaugaaugca	aacauucauugcugucgguggguuuucuuuucugucaacucacugaucaaugaaugcaa	cucacugaucaaugaaugca	cucacugaucaaugaaugca	cucacugaucaaugaaugca	cucacugaucaaugaaugcaaa	acucacugaucaaugaaugca	cucacugaucaaugaaugc	cucacugaucaaugaaugca	cucacugaucaaugaaugca	acucacugaucaaugaaugcaa	43	39	19	2	9	7	7	8	9	5.21983	4.93861	1.92674	0.240911	1.07712	0.799124	0.73908	0.895744	0.81098
117	cli-miR-181b-5p	aacauucauugcugucgguggguuuucuuuucugucaacucacugaucaaugaaugca	aacauucauugcugucgguggguuuucuuuucugucaacucacugaucaaugaaugca	aacauucauugcugucgguggguuuucuuuucugucaacucacugaucaaugaaugca	aacauucauugcugucgguggguuuucuuuucugucaacucacugaucaaugaaugcaaa	aacauucauugcugucgguggguuuucuuuucugucaacucacugaucaaugaaugca	aacauucauugcugucgguggguuuucuuuucugucaacucacugaucaaugaaugc	aacauucauugcugucgguggguuuucuuuucugucaacucacugaucaaugaaugca	aacauucauugcugucgguggguuuucuuuucugucaacucacugaucaaugaaugca	aacauucauugcugucgguggguuuucuuuucugucaacucacugaucaaugaaugcaa	aacauucauugcugucggugggu	aacauucauugcugucggugggu	aacauucauugcugucggugggu	aacauucauugcugucggugggu	aacauucauugcugucggugggu	aacauucauugcugucgguggguu	aacauucauugcugucggugggu	aacauucauugcugucgguggguu	aacauucauugcugucgguggguu	35259	19036	33898	6580	22053	11170	1940	1452	2022	4280.14	2410.55	3437.52	792.597	2639.3	1275.17	204.831	162.577	182.2
118	cli-miR-182-3p	uuuggcaaugguagaacucacacuggugcgguagcaggauccggugguucuagacuugccaacua	uuuggcaaugguagaacucacacuggugcgguagcaggauccggugguucuagacuugccaacu	uuuggcaaugguagaacucacacuggugcgguagcaggauccggugguucuagacuugccaacua	uuuggcaaugguagaacucacacuggugcgguagcaggauccggugguucuagacuugccaacua	uuuggcaaugguagaacucacacuggugcgguagcaggauccggugguucuagacuugccaacua	uuuggcaaugguagaacucacacuggugcgguagcaggauccggugguucuagacuugccaacu	uuuggcaaugguagaacucacacuggugcgguagcaggauccggugguucuagacuugccaacua	uuuggcaaugguagaacucacacuggugcgguagcaggauccggugguucuagacuugccaacua	uuuggcaaugguagaacucacacuggugcgguagcaggauccggugguucuagacuugccaacu	ugguucuagacuugccaacua	ugguucuagacuugccaacu	ugguucuagacuugccaacua	ugguucuagacuugccaacua	ugguucuagacuugccaacua	ggugguucuagacuugccaacu	ugguucuagacuugccaacua	ugguucuagacuugccaacua	gugguucuagacuugccaacu	0	1	0	0	0	1	0	0	1	0	0.126631	0	0	0	0.114161	0	0	0.0901089
119	cli-miR-182-5p	uuuggcaaugguagaacucacacuggugcgguagcaggauccggugguucuagacuugccaacua	uuuggcaaugguagaacucacacuggugcgguagcaggauccggugguucuagacuugccaacu	uuuggcaaugguagaacucacacuggugcgguagcaggauccggugguucuagacuugccaacua	uuuggcaaugguagaacucacacuggugcgguagcaggauccggugguucuagacuugccaacua	uuuggcaaugguagaacucacacuggugcgguagcaggauccggugguucuagacuugccaacua	uuuggcaaugguagaacucacacuggugcgguagcaggauccggugguucuagacuugccaacu	uuuggcaaugguagaacucacacuggugcgguagcaggauccggugguucuagacuugccaacua	uuuggcaaugguagaacucacacuggugcgguagcaggauccggugguucuagacuugccaacua	uuuggcaaugguagaacucacacuggugcgguagcaggauccggugguucuagacuugccaacu	uuuggcaaugguagaacucacacu	uuuggcaaugguagaacucacacu	uuuggcaaugguagaacucacacu	uuuggcaaugguagaacucacacu	uuuggcaaugguagaacucacacu	uuuggcaaugguagaacucacacu	uuuggcaaugguagaacucacacu	uuuggcaaugguagaacucacacu	uuuggcaaugguagaacucacacu	2157	903	1974	953	679	7281	214	277	2427	261.841	114.348	200.179	114.794	81.2628	831.203	22.5947	31.0151	218.694
120	cli-miR-183-3p	uauggcacugguagaauucacugugcaaccccgcggucagugaauuaccauagggccauaaa	uauggcacugguagaauucacugugcaaccccgcggucagugaauuaccauagggccauaaa	uauggcacugguagaauucacugugcaaccccgcggucagugaauuaccauagggccauaaa	uauggcacugguagaauucacugugcaaccccgcggucagugaauuaccauagggccauaaa	uauggcacugguagaauucacugugcaaccccgcggucagugaauuaccauagggccauaaa	uauggcacugguagaauucacugugcaaccccgcggucagugaauuaccauagggccauaa	uauggcacugguagaauucacugugcaaccccgcggucagugaauuaccauagggccauaaa	uauggcacugguagaauucacugugcaaccccgcggucagugaauuaccauagggccauaaa	uauggcacugguagaauucacugugcaaccccgcggucagugaauuaccauagggccauaaa	gugaauuaccauagggccauaaa	gugaauuaccauagggccauaaa	ugaauuaccauagggccauaaa	ugaauuaccauagggccauaaa	gugaauuaccauagggccauaaa	ugaauuaccauagggccauaa	ugaauuaccauagggccauaaa	gugaauuaccauagggccauaaa	gugaauuaccauagggccauaaa	0	0	1	0	0	5	0	0	0	0	0	0.101408	0	0	0.570803	0	0	0
121	cli-miR-183-5p	uauggcacugguagaauucacugugcaaccccgcggucagugaauuaccauagggccauaaa	uauggcacugguagaauucacugugcaaccccgcggucagugaauuaccauagggccauaaa	uauggcacugguagaauucacugugcaaccccgcggucagugaauuaccauagggccauaaa	uauggcacugguagaauucacugugcaaccccgcggucagugaauuaccauagggccauaaa	uauggcacugguagaauucacugugcaaccccgcggucagugaauuaccauagggccauaaa	uauggcacugguagaauucacugugcaaccccgcggucagugaauuaccauagggccauaa	uauggcacugguagaauucacugugcaaccccgcggucagugaauuaccauagggccauaaa	uauggcacugguagaauucacugugcaaccccgcggucagugaauuaccauagggccauaaa	uauggcacugguagaauucacugugcaaccccgcggucagugaauuaccauagggccauaaa	uauggcacugguagaauucacug	uauggcacugguagaauucacug	uauggcacugguagaauucacug	uauggcacugguagaauucacu	uauggcacugguagaauucacug	uauggcacugguagaauucacug	uauggcacugguagaauucacu	uauggcacugguagaauucacug	uauggcacugguagaauucacug	173	89	192	92	40	531	24	15	154	21.0007	11.2702	19.4703	11.0819	4.7872	60.6192	2.53399	1.67952	13.8768
122	cli-miR-184-3p	ccuuaucacuuuuccagcccagcuucuucacuguaacuguuggacggagaacugauaagggu	ccuuaucacuuuuccagcccagcuucuucacuguaacuguuggacggagaacugauaagggu	ccuuaucacuuuuccagcccagcuucuucacuguaacuguuggacggagaacugauaagggu	ccuuaucacuuuuccagcccagcuucuucacuguaacuguuggacggagaacugauaagggu	ccuuaucacuuuuccagcccagcuucuucacuguaacuguuggacggagaacugauaagggu	ccuuaucacuuuuccagcccagcuucuucacuguaacuguuggacggagaacugauaagggu	ccuuaucacuuuuccagcccagcuucuucacuguaacuguuggacggagaacugauaagggu	ccuuaucacuuuuccagcccagcuucuucacuguaacuguuggacggagaacugauaagggu	ccuuaucacuuuuccagcccagcuucuucacuguaacuguuggacggagaacugauaagggu	uggacggagaacugauaagggu	uggacggagaacugauaagggu	uggacggagaacugauaagggu	uggacggagaacugauaagggu	uggacggagaacugauaagggu	uggacggagaacugauaagggu	uggacggagaacugauaagggu	uggacggagaacugauaagggu	uggacggagaacugauaagggu	4054	4139	4792	4340	1703	4873	100	342	177	492.12	524.125	485.945	522.777	203.815	556.304	10.5583	38.293	15.9493
123	cli-miR-187-3p	cuacaacacaggacaugggagcuuuucugaacccucgugucuuguguugcagccag	gcuacaacacaggacaugggagcuuuucugaacccucgugucuuguguugcagccaga	gcuacaacacaggacaugggagcuuuucugaacccucgugucuuguguugcagccaga	gcuacaacacaggacaugggagcuuuucugaacccucgugucuuguguugcagccaga	gcuacaacacaggacaugggagcuuuucugaacccucgugucuuguguugcagccaga	gcuacaacacaggacaugggagcuuuucugaacccucgugucuuguguugcagccaga	gcuacaacacaggacaugggagcuuuucugaacccucgugucuuguguugcagccaga	gcuacaacacaggacaugggagcuuuucugaacccucgugucuuguguugcagccaga	gcuacaacacaggacaugggagcuuuucugaacccucgugucuuguguugcagccaga	ucgugucuuguguugcagccag	ucgugucuuguguugcagccaga	ucgugucuuguguugcagccaga	ucgugucuuguguugcagccaga	ucgugucuuguguugcagccaga	ucgugucuuguguugcagccaga	ucgugucuuguguugcagccaga	ucgugucuuguguugcagccaga	ucgugucuuguguugcagccaga	149	70	109	53	233	94	2328	1306	1453	18.0873	8.86416	11.0534	6.38414	27.8855	10.7311	245.797	146.23	130.928
124	cli-miR-187-5p	cuacaacacaggacaugggagcuuuucugaacccucgugucuuguguugcagccag	gcuacaacacaggacaugggagcuuuucugaacccucgugucuuguguugcagccaga	gcuacaacacaggacaugggagcuuuucugaacccucgugucuuguguugcagccaga	gcuacaacacaggacaugggagcuuuucugaacccucgugucuuguguugcagccaga	gcuacaacacaggacaugggagcuuuucugaacccucgugucuuguguugcagccaga	gcuacaacacaggacaugggagcuuuucugaacccucgugucuuguguugcagccaga	gcuacaacacaggacaugggagcuuuucugaacccucgugucuuguguugcagccaga	gcuacaacacaggacaugggagcuuuucugaacccucgugucuuguguugcagccaga	gcuacaacacaggacaugggagcuuuucugaacccucgugucuuguguugcagccaga	cuacaacacaggacaugggagc	gcuacaacacaggacaugggagc	gcuacaacacaggacaugggagc	gcuacaacacaggacaugggagc	gcuacaacacaggacaugggagc	gcuacaacacaggacaugggag	gcuacaacacaggacaugggagc	gcuacaacacaggacaugggagc	gcuacaacacaggacaugggagc	1	2	1	1	8	4	66	28	42	0.121391	0.253262	0.101408	0.120455	0.957441	0.456642	6.96847	3.1351	3.78457
125	cli-miR-18a-3p	uaaggugcaucuagugcagauagugaaguagauuagcaucuacugcccuaagugcuccuucugg	uaaggugcaucuagugcagauagugaaguagauuagcaucuacugcccuaagugcuccuucugg	uaaggugcaucuagugcagauagugaaguagauuagcaucuacugcccuaagugcuccuucugg	uaaggugcaucuagugcagauagugaaguagauuagcaucuacugcccuaagugcuccuucugg	null	uaaggugcaucuagugcagauagugaaguagauuagcaucuacugcccuaagugcuccuucugg	uaaggugcaucuagugcagauagugaaguagauuagcaucuacugcccuaagugcuccuucugg	null	uaaggugcaucuagugcagauagugaaguagauuagcaucuacugcccuaagugcuccuucugg	acugcccuaagugcuccuucugg	acugcccuaagugcuccuucugg	acugcccuaagugcuccuucugg	acugcccuaagugcuccuucugg	null	acugcccuaagugcuccuucugg	acugcccuaagugcuccuucugg	null	acugcccuaagugcuccuucugg	139	93	106	26	0	34	14	0	12	16.8734	11.7767	10.7492	3.13184	0	3.88146	1.47816	0	1.08131
126	cli-miR-18a-5p	uaaggugcaucuagugcagauagugaaguagauuagcaucuacugcccuaagugcuccuucugg	uaaggugcaucuagugcagauagugaaguagauuagcaucuacugcccuaagugcuccuucugg	uaaggugcaucuagugcagauagugaaguagauuagcaucuacugcccuaagugcuccuucugg	uaaggugcaucuagugcagauagugaaguagauuagcaucuacugcccuaagugcuccuucugg	null	uaaggugcaucuagugcagauagugaaguagauuagcaucuacugcccuaagugcuccuucugg	uaaggugcaucuagugcagauagugaaguagauuagcaucuacugcccuaagugcuccuucugg	null	uaaggugcaucuagugcagauagugaaguagauuagcaucuacugcccuaagugcuccuucugg	uaaggugcaucuagugcagauag	uaaggugcaucuagugcagauag	uaaggugcaucuagugcagauag	uaaggugcaucuagugcagauag	null	uaaggugcaucuagugcagauag	uaaggugcaucuagugcagauag	null	uaaggugcaucuagugcagauag	1102	895	1281	223	0	317	70	0	59	133.773	113.335	129.903	26.8616	0	36.1889	7.3908	0	5.31643
127	cli-miR-18b-3p	uaaggugcaucuagugcaguuagugaaguagcguagaaucuacugcccuaaaugcuccuucuggc	uaaggugcaucuagugcaguuagugaaguagcguagaaucuacugcccuaaaugcuccuucuggc	uaaggugcaucuagugcaguuagugaaguagcguagaaucuacugcccuaaaugcuccuucuggc	uaaggugcaucuagugcaguuagugaaguagcguagaaucuacugcccuaaaugcuccuucugg	uaaggugcaucuagugcaguuagugaaguagcguagaaucuacugcccuaaaugcuccuucugg	uaaggugcaucuagugcaguuagugaaguagcguagaaucuacugcccuaaaugcuccuucugg	uaaggugcaucuagugcaguuagugaaguagcguagaaucuacugcccuaaaugcuccuucuggc	uaaggugcaucuagugcaguuagugaaguagcguagaaucuacugcccuaaaugcuccuucuggc	uaaggugcaucuagugcaguuagugaaguagcguagaaucuacugcccuaaaugcuccuucuggc	acugcccuaaaugcuccuucuggc	acugcccuaaaugcuccuucuggc	acugcccuaaaugcuccuucuggc	acugcccuaaaugcuccuucugg	acugcccuaaaugcuccuucugg	acugcccuaaaugcuccuucugg	ugcccuaaaugcuccuucuggc	ugcccuaaaugcuccuucuggc	ugcccuaaaugcuccuucuggc	82	28	57	7	14	4	1	1	0	9.95409	3.54567	5.78023	0.843188	1.67552	0.456642	0.105583	0.111968	0
128	cli-miR-18b-5p	uaaggugcaucuagugcaguuagugaaguagcguagaaucuacugcccuaaaugcuccuucuggc	uaaggugcaucuagugcaguuagugaaguagcguagaaucuacugcccuaaaugcuccuucuggc	uaaggugcaucuagugcaguuagugaaguagcguagaaucuacugcccuaaaugcuccuucuggc	uaaggugcaucuagugcaguuagugaaguagcguagaaucuacugcccuaaaugcuccuucugg	uaaggugcaucuagugcaguuagugaaguagcguagaaucuacugcccuaaaugcuccuucugg	uaaggugcaucuagugcaguuagugaaguagcguagaaucuacugcccuaaaugcuccuucugg	uaaggugcaucuagugcaguuagugaaguagcguagaaucuacugcccuaaaugcuccuucuggc	uaaggugcaucuagugcaguuagugaaguagcguagaaucuacugcccuaaaugcuccuucuggc	uaaggugcaucuagugcaguuagugaaguagcguagaaucuacugcccuaaaugcuccuucuggc	uaaggugcaucuagugcagu	uaaggugcaucuagugcagu	uaaggugcaucuagugcagu	uaaggugcaucuagugcagu	uaaggugcaucuagugcagu	uaaggugcaucuagugcagu	uaaggugcaucuagugcagu	uaaggugcaucuagugcagu	uaaggugcaucuagugcagu	1725	1145	1186	227	262	254	22	8	15	209.4	144.992	120.269	27.3434	31.3562	28.9968	2.32282	0.895744	1.35163
129	cli-miR-190-3p	ugauauguuugauauauuagguuguuauuuaauccaacuauauaucaaacauauuccu	ugauauguuugauauauuagguuguuauuuaauccaacuauauaucaaacauauuccu	ugauauguuugauauauuagguuguuauuuaauccaacuauauaucaaacauauuccu	ugauauguuugauauauuagguuguuauuuaauccaacuauauaucaaacauauuccu	ugauauguuugauauauuagguuguuauuuaauccaacuauauaucaaacauauuccu	ugauauguuugauauauuagguuguuauuuaauccaacuauauaucaaacauauuccu	ugauauguuugauauauuagguuguuauuuaauccaacuauauaucaaacauauuccu	ugauauguuugauauauuagguuguuauuuaauccaacuauauaucaaacauauuccu	ugauauguuugauauauuagguuguuauuuaauccaacuauauaucaaacauauuccu	cuauauaucaaacauauuccu	cuauauaucaaacauauuccu	cuauauaucaaacauauuccu	cuauauaucaaacauauuccu	cuauauaucaaacauauuccu	cuauauaucaaacauauuccu	cuauauaucaaacauauuccu	cuauauaucaaacauauuccu	cuauauaucaaacauauuccu	156	107	91	86	84	60	78	76	52	18.937	13.5495	9.22809	10.3592	10.0531	6.84963	8.23546	8.50957	4.68566
130	cli-miR-190-5p	ugauauguuugauauauuagguuguuauuuaauccaacuauauaucaaacauauuccu	ugauauguuugauauauuagguuguuauuuaauccaacuauauaucaaacauauuccu	ugauauguuugauauauuagguuguuauuuaauccaacuauauaucaaacauauuccu	ugauauguuugauauauuagguuguuauuuaauccaacuauauaucaaacauauuccu	ugauauguuugauauauuagguuguuauuuaauccaacuauauaucaaacauauuccu	ugauauguuugauauauuagguuguuauuuaauccaacuauauaucaaacauauuccu	ugauauguuugauauauuagguuguuauuuaauccaacuauauaucaaacauauuccu	ugauauguuugauauauuagguuguuauuuaauccaacuauauaucaaacauauuccu	ugauauguuugauauauuagguuguuauuuaauccaacuauauaucaaacauauuccu	ugauauguuugauauauuagguu	ugauauguuugauauauuagguu	ugauauguuugauauauuagguu	ugauauguuugauauauuagguu	ugauauguuugauauauuagguu	ugauauguuugauauauuagguu	ugauauguuugauauauuagguu	ugauauguuugauauauuagguu	ugauauguuugauauauuagguu	703	622	865	597	375	688	376	357	392	85.3381	78.7644	87.7176	71.9119	44.88	78.5424	39.6991	39.9726	35.3227
131	cli-miR-194-3p	uguaacagcaacuccauguggacuacacugacuuccaguggagaugcuguuacuuu	uguaacagcaacuccauguggacuacacugacuuccaguggagaugcuguuacuuu	uguaacagcaacuccauguggacuacacugacuuccaguggagaugcuguuacu	null	uguaacagcaacuccauguggacuacacugacuuccaguggagaugcuguuacuuu	uguaacagcaacuccauguggacuacacugacuuccaguggagaugcuguuacuuu	null	uguaacagcaacuccauguggacuacacugacuuccaguggagaugcuguuacuuu	uguaacagcaacuccauguggacuacacugacuuccaguggagaugcuguuacuuu	ccaguggagaugcuguuacuuu	ccaguggagaugcuguuacuuu	ccaguggagaugcuguuacu	null	caguggagaugcuguuacuuu	ccaguggagaugcuguuacuuu	null	ccaguggagaugcuguuacuuu	caguggagaugcuguuacuuu	0	0	1	0	0	0	0	0	0	0	0	0.101408	0	0	0	0	0	0
132	cli-miR-194-5p	uguaacagcaacuccauguggacuacacugacuuccaguggagaugcuguuacuuu	uguaacagcaacuccauguggacuacacugacuuccaguggagaugcuguuacuuu	uguaacagcaacuccauguggacuacacugacuuccaguggagaugcuguuacu	null	uguaacagcaacuccauguggacuacacugacuuccaguggagaugcuguuacuuu	uguaacagcaacuccauguggacuacacugacuuccaguggagaugcuguuacuuu	null	uguaacagcaacuccauguggacuacacugacuuccaguggagaugcuguuacuuu	uguaacagcaacuccauguggacuacacugacuuccaguggagaugcuguuacuuu	uguaacagcaacuccauguggac	uguaacagcaacuccauguggac	uguaacagcaacuccaugugga	null	uguaacagcaacuccaugugga	uguaacagcaacuccauguggac	null	uguaacagcaacuccauguggac	uguaacagcaacuccaugugga	10	30	253	0	24	22	0	23	20	1.21391	3.79893	25.6561	0	2.87232	2.51153	0	2.57526	1.80218
133	cli-miR-196-3p	uagguaguuucauguuguugggcuuuuaauuuuaaacacaagaacaucaaacuaccugau	uagguaguuucauguuguugggcuuuuaauuuuaaacacaagaacaucaaacuaccugau	uagguaguuucauguuguugggcuuuuaauuuuaaacacaagaacaucaaacuaccugau	uagguaguuucauguuguugggcuuuuaauuuuaaacacaagaacaucaaacuaccugau	uagguaguuucauguuguugggcuuuuaauuuuaaacacaagaacaucaaacuaccugau	uagguaguuucauguuguugggcuuuuaauuuuaaacacaagaacaucaaacuaccugau	uagguaguuucauguuguugggcuuuuaauuuuaaacacaagaacaucaaacuaccugau	uagguaguuucauguuguugggcuuuuaauuuuaaacacaagaacaucaaacuaccugau	uagguaguuucauguuguugggcuuuuaauuuuaaacacaagaacaucaaacuaccuga	acaagaacaucaaacuaccugau	caagaacaucaaacuaccugau	caagaacaucaaacuaccugau	caagaacaucaaacuaccugau	caagaacaucaaacuaccugau	acaagaacaucaaacuaccugau	caagaacaucaaacuaccugau	caagaacaucaaacuaccugau	acaagaacaucaaacuaccuga	2	2	6	15	33	3	6	9	6	0.242783	0.253262	0.608446	1.80683	3.94944	0.342482	0.633497	1.00771	0.540653
134	cli-miR-196-5p	uagguaguuucauguuguugggcuuuuaauuuuaaacacaagaacaucaaacuaccugau	uagguaguuucauguuguugggcuuuuaauuuuaaacacaagaacaucaaacuaccugau	uagguaguuucauguuguugggcuuuuaauuuuaaacacaagaacaucaaacuaccugau	uagguaguuucauguuguugggcuuuuaauuuuaaacacaagaacaucaaacuaccugau	uagguaguuucauguuguugggcuuuuaauuuuaaacacaagaacaucaaacuaccugau	uagguaguuucauguuguugggcuuuuaauuuuaaacacaagaacaucaaacuaccugau	uagguaguuucauguuguugggcuuuuaauuuuaaacacaagaacaucaaacuaccugau	uagguaguuucauguuguugggcuuuuaauuuuaaacacaagaacaucaaacuaccugau	uagguaguuucauguuguugggcuuuuaauuuuaaacacaagaacaucaaacuaccuga	uagguaguuucauguuguugggc	uagguaguuucauguuguuggg	uagguaguuucauguuguuggg	uagguaguuucauguuguuggg	uagguaguuucauguuguugggc	uagguaguuucauguuguuggg	uagguaguuucauguuguugggc	uagguaguuucauguuguugggc	uagguaguuucauguuguugggc	514	313	578	206	636	200	288	309	309	62.3951	39.6355	58.6136	24.8138	76.1165	22.8321	30.4078	34.5981	27.8437
135	cli-miR-199-3p	cccaguguucagacuaccuguucaggacaaugcuguuguacaguagucugcacauugguu	cccaguguucagacuaccuguucaggacaaugcuguuguacaguagucugcacauugguu	cccaguguucagacuaccuguucaggacaaugcuguuguacaguagucugcacauugguu	cccaguguucagacuaccuguucaggacaaugcuguuguacaguagucugcacauugguu	cccaguguucagacuaccuguucaggacaaugcuguuguacaguagucugcacauugguu	cccaguguucagacuaccuguucaggacaaugcuguuguacaguagucugcacauugguu	cccaguguucagacuaccuguucaggacaaugcuguuguacaguagucugcacauugguu	cccaguguucagacuaccuguucaggacaaugcuguuguacaguagucugcacauugguu	cccaguguucagacuaccuguucaggacaaugcuguuguacaguagucugcacauugguu	acaguagucugcacauugguu	acaguagucugcacauugguu	acaguagucugcacauugguu	acaguagucugcacauugguu	acaguagucugcacauugguu	acaguagucugcacauugguu	acaguagucugcacauugguu	acaguagucugcacauugguu	acaguagucugcacauugguu	974319	902851	1258101	140672	215727	174866	33519	36134	24932	118274	114329	127581	16944.7	25818.2	19962.8	3539.03	4045.85	2246.6
136	cli-miR-199-5p	cccaguguucagacuaccuguucaggacaaugcuguuguacaguagucugcacauugguu	cccaguguucagacuaccuguucaggacaaugcuguuguacaguagucugcacauugguu	cccaguguucagacuaccuguucaggacaaugcuguuguacaguagucugcacauugguu	cccaguguucagacuaccuguucaggacaaugcuguuguacaguagucugcacauugguu	cccaguguucagacuaccuguucaggacaaugcuguuguacaguagucugcacauugguu	cccaguguucagacuaccuguucaggacaaugcuguuguacaguagucugcacauugguu	cccaguguucagacuaccuguucaggacaaugcuguuguacaguagucugcacauugguu	cccaguguucagacuaccuguucaggacaaugcuguuguacaguagucugcacauugguu	cccaguguucagacuaccuguucaggacaaugcuguuguacaguagucugcacauugguu	cccaguguucagacuaccuguuc	cccaguguucagacuaccuguuc	cccaguguucagacuaccuguuc	cccaguguucagacuaccuguuc	cccaguguucagacuaccuguuc	cccaguguucagacuaccuguuc	cccaguguucagacuaccuguuc	cccaguguucagacuaccuguuc	cccaguguucagacuaccuguuc	177979	136348	199523	26615	33830	27150	7362	8550	5774	21605.1	17265.9	20233.2	3205.92	4048.78	3099.46	777.301	957.326	520.289
137	cli-miR-19a-3p	aguuuugcauaguugcacuacaagaagaguguaguugugcaaaucuaugcaaaacuga	uaguuuugcauaguugcacuacaagaagaguguaguugugcaaaucuaugcaaaacuga	aguuuugcauaguugcacuacaagaagaguguaguugugcaaaucuaugcaaaacuga	uaguuuugcauaguugcacuacaagaagaguguaguugugcaaaucuaugcaaaacuga	aguuuugcauaguugcacuacaagaagaguguaguugugcaaaucuaugcaaaacuga	aguuuugcauaguugcacuacaagaagaguguaguugugcaaaucuaugcaaaacuga	aguuuugcauaguugcacuacaagaagaguguaguugugcaaaucuaugcaaaacuga	aguuuugcauaguugcacuacaagaagaguguaguugugcaaaucuaugcaaaacuga	aguuuugcauaguugcacuacaagaagaguguaguugugcaaaucuaugcaaaacuga	ugugcaaaucuaugcaaaacuga	ugugcaaaucuaugcaaaacuga	ugugcaaaucuaugcaaaacuga	ugugcaaaucuaugcaaaacuga	ugugcaaaucuaugcaaaacuga	ugugcaaaucuaugcaaaacuga	ugugcaaaucuaugcaaaacuga	ugugcaaaucuaugcaaaacuga	ugugcaaaucuaugcaaaacuga	8023	6281	9383	4450	4053	3146	1708	1457	1860	973.923	795.369	951.508	536.027	485.063	359.149	180.335	163.137	167.603
138	cli-miR-19a-5p	aguuuugcauaguugcacuacaagaagaguguaguugugcaaaucuaugcaaaacuga	uaguuuugcauaguugcacuacaagaagaguguaguugugcaaaucuaugcaaaacuga	aguuuugcauaguugcacuacaagaagaguguaguugugcaaaucuaugcaaaacuga	uaguuuugcauaguugcacuacaagaagaguguaguugugcaaaucuaugcaaaacuga	aguuuugcauaguugcacuacaagaagaguguaguugugcaaaucuaugcaaaacuga	aguuuugcauaguugcacuacaagaagaguguaguugugcaaaucuaugcaaaacuga	aguuuugcauaguugcacuacaagaagaguguaguugugcaaaucuaugcaaaacuga	aguuuugcauaguugcacuacaagaagaguguaguugugcaaaucuaugcaaaacuga	aguuuugcauaguugcacuacaagaagaguguaguugugcaaaucuaugcaaaacuga	aguuuugcauaguugcacuac	uaguuuugcauaguugcacu	aguuuugcauaguugcacuac	uaguuuugcauaguugcacuac	aguuuugcauaguugcacuac	aguuuugcauaguugcacua	aguuuugcauaguugcacuac	aguuuugcauaguugcacua	aguuuugcauaguugcacu	20	7	9	3	5	4	1	2	2	2.42783	0.886416	0.912668	0.361366	0.5984	0.456642	0.105583	0.223936	0.180218
139	cli-miR-19b-3p	aguuuugcagguuugcauccagcuguaugauacucugcugugcaaauccaugcaaaacuga	aguuuugcagguuugcauccagcuguaugauacucugcugugcaaauccaugcaaaacug	aguuuugcagguuugcauccagcuguaugauacucugcugugcaaauccaugcaaaacug	aguuuugcagguuugcauccagcuguaugauacucugcugugcaaauccaugcaaaacug	aguuuugcagguuugcauccagcuguaugauacucugcugugcaaauccaugcaaaacug	aguuuugcagguuugcauccagcuguaugauacucugcugugcaaauccaugcaaaacuga	aguuuugcagguuugcauccagcuguaugauacucugcugugcaaauccaugcaaaacuga	aguuuugcagguuugcauccagcuguaugauacucugcugugcaaauccaugcaaaacug	aguuuugcagguuugcauccagcuguaugauacucugcugugcaaauccaugcaaaacuga	ugugcaaauccaugcaaaacuga	ugugcaaauccaugcaaaacug	ugugcaaauccaugcaaaacug	ugugcaaauccaugcaaaacug	ugugcaaauccaugcaaaacug	ugugcaaauccaugcaaaacuga	ugugcaaauccaugcaaaacuga	ugugcaaauccaugcaaaacug	ugugcaaauccaugcaaaacuga	17900	14925	23343	8943	9394	7666	3978	3343	4075	2172.9	1889.97	2367.16	1077.23	1124.27	875.154	420.008	374.309	367.194
140	cli-miR-19b-5p	aguuuugcagguuugcauccagcuguaugauacucugcugugcaaauccaugcaaaacuga	aguuuugcagguuugcauccagcuguaugauacucugcugugcaaauccaugcaaaacug	aguuuugcagguuugcauccagcuguaugauacucugcugugcaaauccaugcaaaacug	aguuuugcagguuugcauccagcuguaugauacucugcugugcaaauccaugcaaaacug	aguuuugcagguuugcauccagcuguaugauacucugcugugcaaauccaugcaaaacug	aguuuugcagguuugcauccagcuguaugauacucugcugugcaaauccaugcaaaacuga	aguuuugcagguuugcauccagcuguaugauacucugcugugcaaauccaugcaaaacuga	aguuuugcagguuugcauccagcuguaugauacucugcugugcaaauccaugcaaaacug	aguuuugcagguuugcauccagcuguaugauacucugcugugcaaauccaugcaaaacuga	aguuuugcagguuugcauccagc	aguuuugcagguuugcauccagc	aguuuugcagguuugcauccagc	aguuuugcagguuugcauccagc	aguuuugcagguuugcauccagc	aguuuugcagguuugcauccagc	aguuuugcagguuugcauccagc	aguuuugcagguuugcauccagc	aguuuugcagguuugcauccagc	17	7	9	4	8	8	2	1	2	2.06365	0.886416	0.912668	0.481822	0.957441	0.913284	0.211166	0.111968	0.180218
141	cli-miR-1a-3p	acauacuucuuuauaugcccauaugaaccugggaagcuauggaauguaaagaaguauguau	acauacuucuuuauguacccauaugaacauacaaugcuauggaauguaaagaaguauguau	acauacuucuuuauguacccauaugaacauacaaugcuauggaauguaaagaaguauguau	acauacuucuuuauguacccauaugaacauacaaugcuauggaauguaaagaaguauguau	acauacuucuuuauguacccauaugaacauacaaugcuauggaauguaaagaaguauguauuu	acauacuucuuuauguacccauaugaacauacaaugcuauggaauguaaagaaguauguau	acauacuucuuuauguacccauaugaacauacaaugcuauggaauguaaagaaguauguau	acauacuucuuuauguacccauaugaacauacaaugcuauggaauguaaagaaguauguauuu	acauacuucuuuauguacccauaugaacauacaaugcuauggaauguaaagaaguauguau	uggaauguaaagaaguauguau	uggaauguaaagaaguauguau	uggaauguaaagaaguauguau	uggaauguaaagaaguauguau	gaauguaaagaaguauguauuu	uggaauguaaagaaguauguau	uggaauguaaagaaguauguau	gaauguaaagaaguauguauuu	uggaauguaaagaaguauguau	1465	1100	1587	4259	3049	8181	4889	4037	4138	177.838	139.294	160.934	513.02	364.905	933.947	516.194	452.015	372.871
142	cli-miR-1a-5p	acauacuucuuuauaugcccauaugaaccugggaagcuauggaauguaaagaaguauguau	acauacuucuuuauguacccauaugaacauacaaugcuauggaauguaaagaaguauguau	acauacuucuuuauguacccauaugaacauacaaugcuauggaauguaaagaaguauguau	acauacuucuuuauguacccauaugaacauacaaugcuauggaauguaaagaaguauguau	acauacuucuuuauguacccauaugaacauacaaugcuauggaauguaaagaaguauguauuu	acauacuucuuuauguacccauaugaacauacaaugcuauggaauguaaagaaguauguau	acauacuucuuuauguacccauaugaacauacaaugcuauggaauguaaagaaguauguau	acauacuucuuuauguacccauaugaacauacaaugcuauggaauguaaagaaguauguauuu	acauacuucuuuauguacccauaugaacauacaaugcuauggaauguaaagaaguauguau	acauacuucuuuauaugcccaua	acauacuucuuuauguacccaua	acauacuucuuuauguacccau	acauacuucuuuauguacccau	acauacuucuuuauguacccau	acauacuucuuuauguacccau	acauacuucuuuauguacccaua	acauacuucuuuauguacccau	acauacuucuuuauguaccca	10	3	2	5	6	1	7	11	4	1.21391	0.379893	0.202815	0.602277	0.71808	0.114161	0.73908	1.23165	0.360436
143	cli-miR-1b-3p	null	null	acauacuucuucauauacccauauggagucggccggcguuauggaauguuaagaaguauguau	acauacuucuucauauacccauauggagucggccggcguuauggaauguuaagaaguauguau	null	acauacuucuucauauacccauauggagucggccggcguuauggaauguuaagaaguauguau	uacauacuucuucauauacccauauggagucggccggcguuauggaauguuaagaaguauguauu	cuacauacuucuucauauacccauauggagucggccggcguuauggaauguuaagaaguauguauuu	acauacuucuucauauacccauauggagucggccggcguuauggaauguuaagaaguauguau	null	null	uggaauguuaagaaguauguau	uggaauguuaagaaguauguau	null	uggaauguuaagaaguauguau	gaauguuaagaaguauguauu	gaauguuaagaaguauguauuu	uggaauguuaagaaguauguau	0	0	11	8	0	9	18	7	5	0	0	1.11548	0.963643	0	1.02744	1.90049	0.783776	0.450545
144	cli-miR-200a-3p	ucuuacuagacagugcuggauuuuuuggaucuacucuaacacugucugguaacgaug	caucuuacuagacagugcuggauuuuuuggaucuacucuaacacugucugguaacgauguu	caucuuacuagacagugcuggauuuuuuggaucuacucuaacacugucugguaacgauguu	ucuuacuagacagugcuggauuuuuuggaucuacucuaacacugucugguaacgaug	ucuuacuagacagugcuggauuuuuuggaucuacucuaacacugucugguaacgaug	aucuuacuagacagugcuggauuuuuuggaucuacucuaacacugucugguaacgaug	ucuuacuagacagugcuggauuuuuuggaucuacucuaacacugucugguaacgaug	ucuuacuagacagugcuggauuuuuuggaucuacucuaacacugucugguaacgaug	ucuuacuagacagugcuggauuuuuuggaucuacucuaacacugucugguaacgaug	uaacacugucugguaacgaug	uaacacugucugguaacgauguu	uaacacugucugguaacgauguu	uaacacugucugguaacgaug	uaacacugucugguaacgaug	uaacacugucugguaacgaug	uaacacugucugguaacgaug	uaacacugucugguaacgaug	uaacacugucugguaacgaug	39	18	196	13	28	918	556	78	166	4.73426	2.27936	19.8759	1.56592	3.35104	104.799	58.704	8.7335	14.9581
145	cli-miR-200a-5p	ucuuacuagacagugcuggauuuuuuggaucuacucuaacacugucugguaacgaug	caucuuacuagacagugcuggauuuuuuggaucuacucuaacacugucugguaacgauguu	caucuuacuagacagugcuggauuuuuuggaucuacucuaacacugucugguaacgauguu	ucuuacuagacagugcuggauuuuuuggaucuacucuaacacugucugguaacgaug	ucuuacuagacagugcuggauuuuuuggaucuacucuaacacugucugguaacgaug	aucuuacuagacagugcuggauuuuuuggaucuacucuaacacugucugguaacgaug	ucuuacuagacagugcuggauuuuuuggaucuacucuaacacugucugguaacgaug	ucuuacuagacagugcuggauuuuuuggaucuacucuaacacugucugguaacgaug	ucuuacuagacagugcuggauuuuuuggaucuacucuaacacugucugguaacgaug	ucuuacuagacagugcugga	caucuuacuagacagugcugga	caucuuacuagacagugcugga	ucuuacuagacagugcugga	ucuuacuagacagugcugga	aucuuacuagacagugcugga	ucuuacuagacagugcugga	ucuuacuagacagugcugga	ucuuacuagacagugcugga	0	0	4	0	0	1	0	0	0	0	0	0.40563	0	0	0.114161	0	0	0
146	cli-miR-200b-3p	caucuuacugggcagcauuggauguuuucugucuuucuaauacugccugguaaugaugau	caucuuacugggcagcauuggauguuuucugucuuucuaauacugccugguaaugaugau	caucuuacugggcagcauuggauguuuucugucuuucuaauacugccugguaaugaugau	caucuuacugggcagcauuggauguuuucugucuuucuaauacugccugguaaugaugau	caucuuacugggcagcauuggauguuuucugucuuucuaauacugccugguaaugaugau	caucuuacugggcagcauuggauguuuucugucuuucuaauacugccugguaaugaugau	caucuuacugggcagcauuggauguuuucugucuuucuaauacugccugguaaugaugauu	caucuuacugggcagcauuggauguuuucugucuuucuaauacugccugguaaugaugau	caucuuacugggcagcauuggauguuuucugucuuucuaauacugccugguaaugaugau	uaauacugccugguaaugaugau	uaauacugccugguaaugaugau	uaauacugccugguaaugaugau	uaauacugccugguaaugaugau	uaauacugccugguaaugaugau	uaauacugccugguaaugaugau	uaauacugccugguaaugaugauu	uaauacugccugguaaugaugau	uaauacugccugguaaugaugau	12	15	87	9	12	703	157	12	93	1.4567	1.89946	8.82246	1.0841	1.43616	80.2548	16.5765	1.34362	8.38013
147	cli-miR-200b-5p	caucuuacugggcagcauuggauguuuucugucuuucuaauacugccugguaaugaugau	caucuuacugggcagcauuggauguuuucugucuuucuaauacugccugguaaugaugau	caucuuacugggcagcauuggauguuuucugucuuucuaauacugccugguaaugaugau	caucuuacugggcagcauuggauguuuucugucuuucuaauacugccugguaaugaugau	caucuuacugggcagcauuggauguuuucugucuuucuaauacugccugguaaugaugau	caucuuacugggcagcauuggauguuuucugucuuucuaauacugccugguaaugaugau	caucuuacugggcagcauuggauguuuucugucuuucuaauacugccugguaaugaugauu	caucuuacugggcagcauuggauguuuucugucuuucuaauacugccugguaaugaugau	caucuuacugggcagcauuggauguuuucugucuuucuaauacugccugguaaugaugau	caucuuacugggcagcauugga	caucuuacugggcagcauugga	caucuuacugggcagcauugg	caucuuacugggcagcauugga	caucuuacugggcagcauugga	caucuuacugggcagcauugg	caucuuacugggcagcauuggau	caucuuacugggcagcauugga	caucuuacugggcagcauugg	0	4	2	0	1	14	2	1	1	0	0.506524	0.202815	0	0.11968	1.59825	0.211166	0.111968	0.0901089
148	cli-miR-202-5p	null	null	null	null	null	null	null	null	uuccuaugcauauacuucuuugagaauuugaucuaaagaggcauagggcaugggaaaa	null	null	null	null	null	null	null	null	uuccuaugcauauacuucuuu	0	0	0	0	0	0	0	0	3	0	0	0	0	0	0	0	0	0.270327
149	cli-miR-204-5p	uucccuuugucauccuaugccugagaauauaugaagggggcugggaaggcaaagggacgu	uucccuuugucauccuaugccugagccauggccgaggcugggacggugaagggaggc	uucccuuugucauccuaugccugagccauggccgaggcugggacggugaagggaggc	uucccuuugucauccuaugccugagaauauaugaagggggcugggaaggcaaagggacgu	uucccuuugucauccuaugccugagaauauaugaagggggcugggaaggcaaagggacgu	uucccuuugucauccuaugccugagccauggccgaggcugggacggugaagggaggc	uucccuuugucauccuaugccugagaauauaugaagggggcugggaaggcaaagggacgu	uucccuuugucauccuaugccuggagaucacagugaggcagggacagcaaagggaugc	uucccuuugucauccuaugccuggagaucacagugaggcagggacagcaaagggaugc	uucccuuugucauccuaugccug	uucccuuugucauccuaugccug	uucccuuugucauccuaugccug	uucccuuugucauccuaugccug	uucccuuugucauccuaugccug	uucccuuugucauccuaugccug	uucccuuugucauccuaugccug	uucccuuugucauccuaugccug	uucccuuugucauccuaugccug	274	146	149	638	2311	586	103	131	38	33.2612	18.4881	15.1097	76.8506	276.581	66.8981	10.875	14.6678	3.42414
150	cli-miR-205a-3p	uccuucauuccaccggagucugucucauaccuaaaccagauuucaguggagugaaguac	uccuucauuccaccggagucugucucauaccuaaaccagauuucaguggagugaaguacg	uccuucauuccaccggagucugucucauaccuaaaccagauuucaguggagugaaguacg	uccuucauuccaccggagucugucucauaccuaaaccagauuucaguggagugaaguacg	uccuucauuccaccggagucugucucauaccuaaaccagauuucaguggagugaaguacg	uccuucauuccaccggagucugucucauaccuaaaccagauuucaguggagugaaguac	uccuucauuccaccggagucugucucauaccuaaaccagauuucaguggagugaaguac	uccuucauuccaccggagucugucucauaccuaaaccagauuucaguggagugaaguacg	uccuucauuccaccggagucugucucauaccuaaaccagauuucaguggagugaaguacg	gauuucaguggagugaaguac	gauuucaguggagugaaguacg	gauuucaguggagugaaguacg	gauuucaguggagugaaguacg	agauuucaguggagugaaguacg	gauuucaguggagugaaguac	gauuucaguggagugaaguac	agauuucaguggagugaaguacg	gauuucaguggagugaaguacg	1	0	0	0	0	8	1	0	0	0.121391	0	0	0	0	0.913284	0.105583	0	0
151	cli-miR-205a-5p	uccuucauuccaccggagucugucucauaccuaaaccagauuucaguggagugaaguac	uccuucauuccaccggagucugucucauaccuaaaccagauuucaguggagugaaguacg	uccuucauuccaccggagucugucucauaccuaaaccagauuucaguggagugaaguacg	uccuucauuccaccggagucugucucauaccuaaaccagauuucaguggagugaaguacg	uccuucauuccaccggagucugucucauaccuaaaccagauuucaguggagugaaguacg	uccuucauuccaccggagucugucucauaccuaaaccagauuucaguggagugaaguac	uccuucauuccaccggagucugucucauaccuaaaccagauuucaguggagugaaguac	uccuucauuccaccggagucugucucauaccuaaaccagauuucaguggagugaaguacg	uccuucauuccaccggagucugucucauaccuaaaccagauuucaguggagugaaguacg	uccuucauuccaccggagucug	uccuucauuccaccggagucug	uccuucauuccaccggagucug	uccuucauuccaccggagucug	uccuucauuccaccggagucugu	uccuucauuccaccggagucug	uccuucauuccaccggagucug	uccuucauuccaccggagucugu	uccuucauuccaccggagucug	986	347	882	479	859	2785	408	157	878	119.692	43.9409	89.4415	57.6981	102.805	317.937	43.0778	17.579	79.1156
152	cli-miR-205b-5p	cccuucauuccaccggaaucugucuauacagaaaccagauuucagugaaaugaagccug	cccuucauuccaccggaaucugucuauacagaaaccagauuucagugaaaugaagccug	cccuucauuccaccggaaucugucuauacagaaaccagauuucagugaaaugaagccug	cccuucauuccaccggaaucugucuauacagaaaccagauuucagugaaaugaagccug	cccuucauuccaccggaaucugucuauacagaaaccagauuucagugaaaugaagccug	cccuucauuccaccggaaucugucuauacagaaaccagauuucagugaaaugaagccug	null	null	null	cccuucauuccaccggaaucug	cccuucauuccaccggaaucug	cccuucauuccaccggaaucug	cccuucauuccaccggaaucug	cccuucauuccaccggaaucug	cccuucauuccaccggaaucug	null	null	null	411	428	436	5	10	12	0	0	0	49.8918	54.198	44.2137	0.602277	1.1968	1.36993	0	0	0
153	cli-miR-20a-3p	uaaagugcuuauagugcagguaguguucacuaaucuacugcauuauaagcacuuaaagu	uaaagugcuuauagugcagguaguguucacuaaucuacugcauuauaagcacuuaaagu	uaaagugcuuauagugcagguaguguucacuaaucuacugcauuauaagcacuuaaagu	uaaagugcuuauagugcagguaguguucacuaaucuacugcauuauaagcacuuaaagu	uaaagugcuuauagugcagguaguguucacuaaucuacugcauuauaagcacuuaaagu	uaaagugcuuauagugcagguaguguucacuaaucuacugcauuauaagcacuuaaagu	uaaagugcuuauagugcagguaguguucacuaaucuacugcauuauaagcacuuaaagu	uaaagugcuuauagugcagguaguguucacuaaucuacugcauuauaagcacuuaaagu	uaaagugcuuauagugcagguaguguucacuaaucuacugcauuauaagcacuuaaagu	acugcauuauaagcacuuaaagu	acugcauuauaagcacuuaaagu	acugcauuauaagcacuuaaagu	acugcauuauaagcacuuaaagu	acugcauuauaagcacuuaaagu	acugcauuauaagcacuuaaagu	acugcauuauaagcacuuaaagu	acugcauuauaagcacuuaaagu	acugcauuauaagcacuuaaagu	48	24	47	19	18	19	16	9	15	5.82678	3.03914	4.76616	2.28865	2.15424	2.16905	1.68932	1.00771	1.35163
154	cli-miR-20a-5p	uaaagugcuuauagugcagguaguguucacuaaucuacugcauuauaagcacuuaaagu	uaaagugcuuauagugcagguaguguucacuaaucuacugcauuauaagcacuuaaagu	uaaagugcuuauagugcagguaguguucacuaaucuacugcauuauaagcacuuaaagu	uaaagugcuuauagugcagguaguguucacuaaucuacugcauuauaagcacuuaaagu	uaaagugcuuauagugcagguaguguucacuaaucuacugcauuauaagcacuuaaagu	uaaagugcuuauagugcagguaguguucacuaaucuacugcauuauaagcacuuaaagu	uaaagugcuuauagugcagguaguguucacuaaucuacugcauuauaagcacuuaaagu	uaaagugcuuauagugcagguaguguucacuaaucuacugcauuauaagcacuuaaagu	uaaagugcuuauagugcagguaguguucacuaaucuacugcauuauaagcacuuaaagu	uaaagugcuuauagugcagguag	uaaagugcuuauagugcagguag	uaaagugcuuauagugcagguag	uaaagugcuuauagugcagguag	uaaagugcuuauagugcagguagu	uaaagugcuuauagugcagguag	uaaagugcuuauagugcagguagu	uaaagugcuuauagugcagguagu	uaaagugcuuauagugcagguagu	6344	5408	10111	3761	3679	4118	1769	1471	1727	770.107	684.82	1025.33	453.033	440.303	470.113	186.776	164.705	155.618
155	cli-miR-20b-3p	caaagugcucauagugcagguagcuuugaauugaaccuacuguaaugugggcacuuauagu	caaagugcucauagugcagguagcuuugaauugaaccuacuguaaugugggcacuuauagu	caaagugcucauagugcagguagcuuugaauugaaccuacuguaaugugggcacuuauagu	caaagugcucauagugcagguagcuuugaauugaaccuacuguaaugugggcacuuauagu	caaagugcucauagugcagguagcuuugaauugaaccuacuguaaugugggcacuuau	caaagugcucauagugcagguagcuuugaauugaaccuacuguaaugugggcacuuau	caaagugcucauagugcagguagcuuugaauugaaccuacuguaaugugggcacuuau	caaagugcucauagugcagguagcuuugaauugaaccuacuguaaugugggcacuuau	caaagugcucauagugcagguagcuuugaauugaaccuacuguaaugugggcacuuau	acuguaaugugggcacuuauagu	acuguaaugugggcacuuauagu	acuguaaugugggcacuuauagu	acuguaaugugggcacuuauagu	uacuguaaugugggcacuuau	uacuguaaugugggcacuuau	uacuguaaugugggcacuuau	cuacuguaaugugggcacuuau	uacuguaaugugggcacuuau	124	78	118	27	32	18	2	4	2	15.0525	9.87721	11.9661	3.2523	3.82976	2.05489	0.211166	0.447872	0.180218
156	cli-miR-20b-5p	caaagugcucauagugcagguagcuuugaauugaaccuacuguaaugugggcacuuauagu	caaagugcucauagugcagguagcuuugaauugaaccuacuguaaugugggcacuuauagu	caaagugcucauagugcagguagcuuugaauugaaccuacuguaaugugggcacuuauagu	caaagugcucauagugcagguagcuuugaauugaaccuacuguaaugugggcacuuauagu	caaagugcucauagugcagguagcuuugaauugaaccuacuguaaugugggcacuuau	caaagugcucauagugcagguagcuuugaauugaaccuacuguaaugugggcacuuau	caaagugcucauagugcagguagcuuugaauugaaccuacuguaaugugggcacuuau	caaagugcucauagugcagguagcuuugaauugaaccuacuguaaugugggcacuuau	caaagugcucauagugcagguagcuuugaauugaaccuacuguaaugugggcacuuau	caaagugcucauagugcagguag	caaagugcucauagugcagguag	caaagugcucauagugcagguag	caaagugcucauagugcagguagc	caaagugcucauagugcagguagc	caaagugcucauagugcagguagc	caaagugcucauagugcagguagc	caaagugcucauagugcagguagc	caaagugcucauagugcagguagc	4421	3322	6280	730	1449	1031	189	155	158	536.671	420.668	636.84	87.9325	173.416	117.699	19.9552	17.355	14.2372
157	cli-miR-210-3p	agccacugacuaacgcacauugugcucucggcgacuccacugugcgugugacagcggcu	agccacugacuaacgcacauugugcucucggcgacuccacugugcgugugacagcggcu	agccacugacuaacgcacauugugcucucggcgacuccacugugcgugugacagcggcu	agccacugacuaacgcacauugugcucucggcgacuccacugugcgugugacagcggcu	agccacugacuaacgcacauugugcucucggcgacuccacugugcgugugacagcggcu	agccacugacuaacgcacauugugcucucggcgacuccacugugcgugugacagcggcuaa	agccacugacuaacgcacauugugcucucggcgacuccacugugcgugugacagcggcuaa	agccacugacuaacgcacauugugcucucggcgacuccacugugcgugugacagcggcuaa	agccacugacuaacgcacauugugcucucggcgacuccacugugcgugugacagcggcuaa	cugugcgugugacagcggcu	cugugcgugugacagcggcu	cugugcgugugacagcggcu	cugugcgugugacagcggcu	cugugcgugugacagcggcu	cugugcgugugacagcggcuaa	cugugcgugugacagcggcuaa	cugugcgugugacagcggcuaa	cugugcgugugacagcggcuaa	1078	561	670	96	63	137	62	100	50	130.86	71.0399	67.9431	11.5637	7.53984	15.64	6.54613	11.1968	4.50545
158	cli-miR-210-5p	agccacugacuaacgcacauugugcucucggcgacuccacugugcgugugacagcggcu	agccacugacuaacgcacauugugcucucggcgacuccacugugcgugugacagcggcu	agccacugacuaacgcacauugugcucucggcgacuccacugugcgugugacagcggcu	agccacugacuaacgcacauugugcucucggcgacuccacugugcgugugacagcggcu	agccacugacuaacgcacauugugcucucggcgacuccacugugcgugugacagcggcu	agccacugacuaacgcacauugugcucucggcgacuccacugugcgugugacagcggcuaa	agccacugacuaacgcacauugugcucucggcgacuccacugugcgugugacagcggcuaa	agccacugacuaacgcacauugugcucucggcgacuccacugugcgugugacagcggcuaa	agccacugacuaacgcacauugugcucucggcgacuccacugugcgugugacagcggcuaa	agccacugacuaacgcacauug	agccacugacuaacgcacauug	agccacugacuaacgcacauug	agccacugacuaacgcacauug	agccacugacuaacgcacauug	agccacugacuaacgcacauug	agccacugacuaacgcacauug	agccacugacuaacgcacauug	agccacugacuaacgcacauug	657	329	515	96	260	182	155	242	187	79.7541	41.6616	52.2249	11.5637	31.1168	20.7772	16.3653	27.0962	16.8504
159	cli-miR-2131-3p	augcagaagugcacggaaacagcuauuugcuauugaaaaguuggcuguuacuguucuucugaugg	augcagaagugcacggaaacagcuauuugcuauugaaaaguuggcuguuacuguucuucugaugg	augcagaagugcacggaaacagcuauuugcuauugaaaaguuggcuguuacuguucuucugaugg	augcagaagugcacggaaacagcuauuugcuauugaaaaguuggcuguuacuguucuucugaugga	augcagaagugcacggaaacagcuauuugcuauugaaaaguuggcuguuacuguucuucugaugga	augcagaagugcacggaaacagcuauuugcuauugaaaaguuggcuguuacuguucuucugaugga	augcagaagugcacggaaacagcuauuugcuauugaaaaguuggcuguuacuguucuucugaugga	augcagaagugcacggaaacagcuauuugcuauugaaaaguuggcuguuacuguucuucugaugga	augcagaagugcacggaaacagcuauuugcuauugaaaaguuggcuguuacuguucuucugaugg	cuguuacuguucuucugaugg	cuguuacuguucuucugaugg	cuguuacuguucuucugaugg	cuguuacuguucuucugaugga	cuguuacuguucuucugaugga	cuguuacuguucuucugaugga	cuguuacuguucuucugaugga	cuguuacuguucuucugaugga	cuguuacuguucuucugaugg	109	67	71	10	74	28	20	19	16	13.2317	8.48427	7.19994	1.20455	8.85633	3.19649	2.11166	2.12739	1.44174
160	cli-miR-2131-5p	augcagaagugcacggaaacagcuauuugcuauugaaaaguuggcuguuacuguucuucugaugg	augcagaagugcacggaaacagcuauuugcuauugaaaaguuggcuguuacuguucuucugaugg	augcagaagugcacggaaacagcuauuugcuauugaaaaguuggcuguuacuguucuucugaugg	augcagaagugcacggaaacagcuauuugcuauugaaaaguuggcuguuacuguucuucugaugga	augcagaagugcacggaaacagcuauuugcuauugaaaaguuggcuguuacuguucuucugaugga	augcagaagugcacggaaacagcuauuugcuauugaaaaguuggcuguuacuguucuucugaugga	augcagaagugcacggaaacagcuauuugcuauugaaaaguuggcuguuacuguucuucugaugga	augcagaagugcacggaaacagcuauuugcuauugaaaaguuggcuguuacuguucuucugaugga	augcagaagugcacggaaacagcuauuugcuauugaaaaguuggcuguuacuguucuucugaugg	augcagaagugcacggaaacagcu	augcagaagugcacggaaacagcu	augcagaagugcacggaaacagcu	augcagaagugcacggaaacagcu	augcagaagugcacggaaacagcu	augcagaagugcacggaaacagcu	augcagaagugcacggaaacagcu	augcagaagugcacggaaacagcu	augcagaagugcacggaaacagcu	246	206	382	43	89	62	65	42	51	29.8623	26.086	38.7377	5.17958	10.6515	7.07795	6.86288	4.70265	4.59555
161	cli-miR-21-3p	uagcuuaucagacugauguugacuguuggaucucauggcaacaacagucgguaggcugucu	uagcuuaucagacugauguugacuguuggaucucauggcaacaacagucgguaggcugucu	uagcuuaucagacugauguugacuguuggaucucauggcaacaacagucgguaggcugucu	uagcuuaucagacugauguugacuguuggaucucauggcaacaacagucgguaggcugucu	uagcuuaucagacugauguugacuguuggaucucauggcaacaacagucgguaggcugucu	uagcuuaucagacugauguugacuguuggaucucauggcaacaacagucgguaggcugucu	uagcuuaucagacugauguugacuguuggaucucauggcaacaacagucgguaggcugucu	uagcuuaucagacugauguugacuguuggaucucauggcaacaacagucgguaggcugu	uagcuuaucagacugauguugacuguuggaucucauggcaacaacagucgguaggcugucu	caacaacagucgguaggcugucu	caacaacagucgguaggcugucu	caacaacagucgguaggcugucu	caacaacagucgguaggcugucu	caacaacagucgguaggcugucu	caacaacagucgguaggcugucu	caacaacagucgguaggcugucu	caacaacagucgguaggcugu	caacaacagucgguaggcugucu	830	555	750	399	420	268	158	159	104	100.755	70.2802	76.0557	48.0617	50.2656	30.595	16.6821	17.8029	9.37133
162	cli-miR-214-3p	ugccugucuacacuugcugugcagaacauccucucaccuguacagcaggcacagacaggcagu	ugccugucuacacuugcugugcagaacauccucucaccuguacagcaggcacagacaggcagu	ugccugucuacacuugcugugcagaacauccucucaccuguacagcaggcacagacaggcagu	ugccugucuacacuugcugugcagaacauccucucaccuguacagcaggcacagacaggcagu	ugccugucuacacuugcugugcagaacauccucucaccuguacagcaggcacagacaggcagu	ugccugucuacacuugcugugcagaacauccucucaccuguacagcaggcacagacaggcagu	ugccugucuacacuugcugugcagaacauccucucaccuguacagcaggcacagacaggcagu	ugccugucuacacuugcugugcagaacauccucucaccuguacagcaggcacagacaggcagu	ugccugucuacacuugcugugcagaacauccucucaccuguacagcaggcacagacaggcagu	acagcaggcacagacaggcagu	acagcaggcacagacaggcagu	acagcaggcacagacaggcagu	acagcaggcacagacaggcagu	acagcaggcacagacaggcagu	acagcaggcacagacaggcagu	acagcaggcacagacaggcagu	acagcaggcacagacaggcagu	acagcaggcacagacaggcagu	5260	3292	4136	669	1171	1495	378	420	380	638.518	416.869	419.422	80.5847	140.145	170.67	39.9103	47.0265	34.2414
163	cli-miR-214-5p	ugccugucuacacuugcugugcagaacauccucucaccuguacagcaggcacagacaggcagu	ugccugucuacacuugcugugcagaacauccucucaccuguacagcaggcacagacaggcagu	ugccugucuacacuugcugugcagaacauccucucaccuguacagcaggcacagacaggcagu	ugccugucuacacuugcugugcagaacauccucucaccuguacagcaggcacagacaggcagu	ugccugucuacacuugcugugcagaacauccucucaccuguacagcaggcacagacaggcagu	ugccugucuacacuugcugugcagaacauccucucaccuguacagcaggcacagacaggcagu	ugccugucuacacuugcugugcagaacauccucucaccuguacagcaggcacagacaggcagu	ugccugucuacacuugcugugcagaacauccucucaccuguacagcaggcacagacaggcagu	ugccugucuacacuugcugugcagaacauccucucaccuguacagcaggcacagacaggcagu	ugccugucuacacuugcugugc	ugccugucuacacuugcugugc	ugccugucuacacuugcugugc	ugccugucuacacuugcugugc	ugccugucuacacuugcugugc	ugccugucuacacuugcugugc	ugccugucuacacuugcugugc	ugccugucuacacuugcugugc	ugccugucuacacuugcugugc	1571	1004	1415	207	396	187	49	80	63	190.706	127.137	143.492	24.9343	47.3933	21.348	5.17356	8.95744	5.67686
164	cli-miR-215-5p	augaccuaugaauugacagacugcuuucuaaacuugccugucauuucuauaggccaaua	augaccuaugaauugacagacugcuuucuaaacuugccugucauuucuauaggccaaua	augaccuaugaauugacagacugcuuucuaaacuugccugucauuucuauaggccaaua	augaccuaugaauugacagacugcuuucuaaacuugccugucauuucuauaggccaaua	augaccuaugaauugacagacugcuuucuaaacuugccugucauuucuauaggccaaua	augaccuaugaauugacagacugcuuucuaaacuugccugucauuucuauaggccaaua	augaccuaugaauugacagacugcuuucuaaacuugccugucauuucuauaggccaaua	augaccuaugaauugacagacugcuuucuaaacuugccugucauuucuauaggccaaua	augaccuaugaauugacagacugcuuucuaaacuugccugucauuucuauaggccaaua	augaccuaugaauugacagacu	augaccuaugaauugacagacu	augaccuaugaauugacagac	augaccuaugaauugacagacu	augaccuaugaauugacagacu	augaccuaugaauugacagacu	augaccuaugaauugacagacu	augaccuaugaauugacagacu	augaccuaugaauugacagacu	180	387	917	42	166	188	43	174	65	21.8504	49.0062	92.9908	5.05913	19.8669	21.4622	4.54006	19.4824	5.85708
165	cli-miR-21-5p	uagcuuaucagacugauguugacuguuggaucucauggcaacaacagucgguaggcugucu	uagcuuaucagacugauguugacuguuggaucucauggcaacaacagucgguaggcugucu	uagcuuaucagacugauguugacuguuggaucucauggcaacaacagucgguaggcugucu	uagcuuaucagacugauguugacuguuggaucucauggcaacaacagucgguaggcugucu	uagcuuaucagacugauguugacuguuggaucucauggcaacaacagucgguaggcugucu	uagcuuaucagacugauguugacuguuggaucucauggcaacaacagucgguaggcugucu	uagcuuaucagacugauguugacuguuggaucucauggcaacaacagucgguaggcugucu	uagcuuaucagacugauguugacuguuggaucucauggcaacaacagucgguaggcugu	uagcuuaucagacugauguugacuguuggaucucauggcaacaacagucgguaggcugucu	uagcuuaucagacugauguugac	uagcuuaucagacugauguugac	uagcuuaucagacugauguugac	uagcuuaucagacugauguuga	uagcuuaucagacugauguuga	uagcuuaucagacugauguuga	uagcuuaucagacugauguugacu	uagcuuaucagacugauguugacu	uagcuuaucagacugauguugacu	59619	47998	59003	28993	38331	44161	15283	12772	11058	7237.23	6078.03	5983.35	3492.36	4587.46	5041.44	1613.62	1430.05	996.424
166	cli-miR-216a-3p	null	uaaucucagcuggcaacugugagccgcuaauaacucucucacagugguaucugggauuaug	cagaaacguagcugacaugaauccacuugcaggccugaccuggacggcugugaauuggcuuaaucucagcuggcaacugug	null	null	null	uaaucucagcuggcaacugugagccgcuaauaacucucucacagugguaucugggauuaug	null	null	null	cagugguaucugggauuaug	uaaucucagcuggcaacugug	null	null	null	acagugguaucugggauuaug	null	null	0	0	2	0	0	0	0	0	0	0	0	0.202815	0	0	0	0	0	0
167	cli-miR-216a-5p	null	uaaucucagcuggcaacugugagccgcuaauaacucucucacagugguaucugggauuaug	cagaaacguagcugacaugaauccacuugcaggccugaccuggacggcugugaauuggcuuaaucucagcuggcaacugug	null	null	null	uaaucucagcuggcaacugugagccgcuaauaacucucucacagugguaucugggauuaug	null	null	null	uaaucucagcuggcaacugug	cagaaacguagcugacaugaau	null	null	null	uaaucucagcuggcaacuguga	null	null	0	2	0	0	0	0	2	0	0	0	0.253262	0	0	0	0	0.211166	0	0
168	cli-miR-216b-3p	aaaucucugcaggcaaaugugaugucuuuauagcaaucucacaauuaccuguagagauucu	aaaucucugcaggcaaaugugaugucuuuauagcaaucucacaauuaccuguagagauucu	aaaucucugcaggcaaaugugaugucuuuauagcaaucucacaauuaccuguagagauucu	null	null	null	null	null	null	acaauuaccuguagagauucu	acaauuaccuguagagauucu	ucacaauuaccuguagagauucu	null	null	null	null	null	null	0	0	2	0	0	0	0	0	0	0	0	0.202815	0	0	0	0	0	0
169	cli-miR-216b-5p	aaaucucugcaggcaaaugugaugucuuuauagcaaucucacaauuaccuguagagauucu	aaaucucugcaggcaaaugugaugucuuuauagcaaucucacaauuaccuguagagauucu	aaaucucugcaggcaaaugugaugucuuuauagcaaucucacaauuaccuguagagauucu	null	null	null	null	null	null	aaaucucugcaggcaaauguga	aaaucucugcaggcaaauguga	aaaucucugcaggcaaauguga	null	null	null	null	null	null	7	9	6	0	0	0	0	0	0	0.849739	1.13968	0.608446	0	0	0	0	0	0
170	cli-miR-217-5p	auacugcaucaggaacugauuggauaauaaucagucaccaucaguuccuaaugcauugccu	uacugcaucaggaacugauuggauaauaaucagucaccaucaguuccuaaugcauugcc	auacugcaucaggaacugauuggauaauaaucagucaccaucaguuccuaaugcauugccu	null	null	null	null	null	null	auacugcaucaggaacugauug	uacugcaucaggaacugauugga	auacugcaucaggaacugauugga	null	null	null	null	null	null	9	11	5	0	0	0	0	0	0	1.09252	1.39294	0.507038	0	0	0	0	0	0
171	cli-miR-218-3p	uugugcuugaucuaaccaugugguagaacaauacaaauggaacaugguucugucaagcaccaugg	uugugcuugaucuaaccaugugguugugagguaugaguaaaacaugguucugucaagcaccaug	uugugcuugaucuaaccaugugguagaacaauacaaauggaacaugguucugucaagcaccau	uugugcuugaucuaaccaugugguugugagguaugaguaaaacaugguucugucaagcaccaug	uugugcuugaucuaaccaugugguugugagguaugaguaaaacaugguucugucaagcaccau	uugugcuugaucuaaccaugugguugugagguaugaguaaaacaugguucugucaagcaccau	uugugcuugaucuaaccaugugguugugagguaugaguaaaacaugguucugucaagcaccaug	uugugcuugaucuaaccaugugguugugagguaugaguaaaacaugguucugucaagcaccaug	uugugcuugaucuaaccaugugguagaacaauacaaauggaacaugguucugucaagcaccaug	caugguucugucaagcaccaugg	caugguucugucaagcaccaug	caugguucugucaagcaccau	augguucugucaagcaccaug	caugguucugucaagcaccau	caugguucugucaagcaccau	augguucugucaagcaccaug	augguucugucaagcaccaug	augguucugucaagcaccaug	3	2	1	0	2	1	0	0	0	0.364174	0.253262	0.101408	0	0.23936	0.114161	0	0	0
172	cli-miR-218-5p	uugugcuugaucuaaccaugugguagaacaauacaaauggaacaugguucugucaagcaccaugg	uugugcuugaucuaaccaugugguugugagguaugaguaaaacaugguucugucaagcaccaug	uugugcuugaucuaaccaugugguagaacaauacaaauggaacaugguucugucaagcaccau	uugugcuugaucuaaccaugugguugugagguaugaguaaaacaugguucugucaagcaccaug	uugugcuugaucuaaccaugugguugugagguaugaguaaaacaugguucugucaagcaccau	uugugcuugaucuaaccaugugguugugagguaugaguaaaacaugguucugucaagcaccau	uugugcuugaucuaaccaugugguugugagguaugaguaaaacaugguucugucaagcaccaug	uugugcuugaucuaaccaugugguugugagguaugaguaaaacaugguucugucaagcaccaug	uugugcuugaucuaaccaugugguagaacaauacaaauggaacaugguucugucaagcaccaug	uugugcuugaucuaaccaugu	uugugcuugaucuaaccaugu	uugugcuugaucuaaccaugu	uugugcuugaucuaaccaugu	uugugcuugaucuaaccaugu	uugugcuugaucuaaccaugu	uugugcuugaucuaaccaugu	uugugcuugaucuaaccaugu	uugugcuugaucuaaccaugu	879	590	604	119	302	145	85	76	62	106.703	74.7122	61.2502	14.3342	36.1434	16.5533	8.97454	8.50957	5.58675
173	cli-miR-2188-3p	aagguccaaccucacauguccuguauagaauaaagagggauauauguggucagaccuaucc	aagguccaaccucacauguccuguauagaauaaagagggauauauguggucagaccuaucc	aagguccaaccucacauguccuguauagaauaaagagggauauauguggucagaccuaucc	aagguccaaccucacauguccuguauagaauaaagagggauauauguggucagaccuaucc	aagguccaaccucacauguccuguauagaauaaagagggauauauguggucagaccuaucc	aagguccaaccucacauguccuguauagaauaaagagggauauauguggucagaccuaucc	aagguccaaccucacauguccuguauagaauaaagagggauauauguggucagaccuaucc	aagguccaaccucacauguccuguauagaauaaagagggauauauguggucagaccuaucc	aagguccaaccucacauguccuguauagaauaaagagggauauauguggucagaccuaucc	auauauguggucagaccuaucc	auauauguggucagaccuaucc	auauauguggucagaccuaucc	auauauguggucagaccuaucc	auauauguggucagaccuaucc	auauauguggucagaccuaucc	auauauguggucagaccuaucc	auauauguggucagaccuaucc	auauauguggucagaccuaucc	370	101	103	389	545	414	481	599	361	44.9148	12.7897	10.445	46.8572	65.2256	47.2624	50.7853	67.0688	32.5293
174	cli-miR-2188-5p	aagguccaaccucacauguccuguauagaauaaagagggauauauguggucagaccuaucc	aagguccaaccucacauguccuguauagaauaaagagggauauauguggucagaccuaucc	aagguccaaccucacauguccuguauagaauaaagagggauauauguggucagaccuaucc	aagguccaaccucacauguccuguauagaauaaagagggauauauguggucagaccuaucc	aagguccaaccucacauguccuguauagaauaaagagggauauauguggucagaccuaucc	aagguccaaccucacauguccuguauagaauaaagagggauauauguggucagaccuaucc	aagguccaaccucacauguccuguauagaauaaagagggauauauguggucagaccuaucc	aagguccaaccucacauguccuguauagaauaaagagggauauauguggucagaccuaucc	aagguccaaccucacauguccuguauagaauaaagagggauauauguggucagaccuaucc	aagguccaaccucacauguccu	aagguccaaccucacauguccu	aagguccaaccucacauguccu	aagguccaaccucacauguccu	aagguccaaccucacauguccu	aagguccaaccucacauguccu	aagguccaaccucacauguccu	aagguccaaccucacauguccu	aagguccaaccucacauguccu	2979	950	947	5365	5673	9875	5454	6162	4569	361.625	120.299	96.033	646.243	678.945	1127.33	575.849	689.947	411.708
175	cli-miR-221-3p	accuggcauacaauguagauuucuguguuuguuaagcaacagcuacauugucugcuggguuuc	accuggcauacaauguagauuucuguguuuguuaagcaacagcuacauugucugcuggguuuc	accuggcauacaauguagauuucuguguuuguuaagcaacagcuacauugucugcuggguuuc	accuggcauacaauguagauuucuguguuuguuaagcaacagcuacauugucugcuggguuu	accuggcauacaauguagauuucuguguuuguuaagcaacagcuacauugucugcuggguuucc	accuggcauacaauguagauuucuguguuuguuaagcaacagcuacauugucugcuggguuu	accuggcauacaauguagauuucuguguuuguuaagcaacagcuacauugucugcuggguuu	accuggcauacaauguagauuucuguguuuguuaagcaacagcuacauugucugcuggguuu	accuggcauacaauguagauuucuguguuuguuaagcaacagcuacauugucugcuggguuu	agcuacauugucugcuggguuuc	agcuacauugucugcuggguuuc	agcuacauugucugcuggguuuc	agcuacauugucugcuggguuu	agcuacauugucugcuggguuucc	agcuacauugucugcuggguuu	agcuacauugucugcuggguuu	agcuacauugucugcuggguuu	agcuacauugucugcuggguuu	6161	4054	6946	1586	1896	1763	1651	1069	922	747.892	513.362	704.377	191.042	226.913	201.265	174.317	119.694	83.0804
176	cli-miR-221-5p	accuggcauacaauguagauuucuguguuuguuaagcaacagcuacauugucugcuggguuuc	accuggcauacaauguagauuucuguguuuguuaagcaacagcuacauugucugcuggguuuc	accuggcauacaauguagauuucuguguuuguuaagcaacagcuacauugucugcuggguuuc	accuggcauacaauguagauuucuguguuuguuaagcaacagcuacauugucugcuggguuu	accuggcauacaauguagauuucuguguuuguuaagcaacagcuacauugucugcuggguuucc	accuggcauacaauguagauuucuguguuuguuaagcaacagcuacauugucugcuggguuu	accuggcauacaauguagauuucuguguuuguuaagcaacagcuacauugucugcuggguuu	accuggcauacaauguagauuucuguguuuguuaagcaacagcuacauugucugcuggguuu	accuggcauacaauguagauuucuguguuuguuaagcaacagcuacauugucugcuggguuu	accuggcauacaauguagauuucugu	accuggcauacaauguagauuucugu	accuggcauacaauguagauuucugu	accuggcauacaauguagauuuc	accuggcauacaauguagauuuc	accuggcauacaauguagauuuc	accuggcauacaauguagauuuc	accuggcauacaauguagauuuc	accuggcauacaauguagauuuc	480	299	578	65	100	112	44	32	40	58.2678	37.8626	58.6136	7.8296	11.968	12.786	4.64564	3.58297	3.60436
177	cli-miR-222a-3p	cgcucaguagucaguguagauccugucuuuacaaucagcagcuacaucuggcuacugggucuc	cgcucaguagucaguguagauccugucuuuacaaucagcagcuacaucuggcuacugggucuc	cgcucaguagucaguguagauccugucuuuacaaucagcagcuacaucuggcuacugggucuc	cgcucaguagucaguguagauccugucuuuacaaucagcagcuacaucuggcuacugggucuc	cgcucaguagucaguguagauccugucuuuacaaucagcagcuacaucuggcuacugggucuc	cgcucaguagucaguguagauccugucuuuacaaucagcagcuacaucuggcuacugggucuc	cgcucaguagucaguguagauccugucuuuacaaucagcagcuacaucuggcuacugggucuc	cgcucaguagucaguguagauccugucuuuacaaucagcagcuacaucuggcuacugggucuc	cgcucaguagucaguguagauccugucuuuacaaucagcagcuacaucuggcuacugggucuc	agcuacaucuggcuacugggucuc	agcuacaucuggcuacugggucuc	agcuacaucuggcuacugggucuc	agcuacaucuggcuacugggucuc	agcuacaucuggcuacugggucuc	agcuacaucuggcuacugggucuc	agcuacaucuggcuacugggucuc	agcuacaucuggcuacugggucuc	agcuacaucuggcuacugggucuc	10955	5910	12404	984	3278	1690	1617	1167	1066	1329.84	748.389	1257.86	118.528	392.311	192.931	170.727	130.667	96.0561
178	cli-miR-222a-5p	cgcucaguagucaguguagauccugucuuuacaaucagcagcuacaucuggcuacugggucuc	cgcucaguagucaguguagauccugucuuuacaaucagcagcuacaucuggcuacugggucuc	cgcucaguagucaguguagauccugucuuuacaaucagcagcuacaucuggcuacugggucuc	cgcucaguagucaguguagauccugucuuuacaaucagcagcuacaucuggcuacugggucuc	cgcucaguagucaguguagauccugucuuuacaaucagcagcuacaucuggcuacugggucuc	cgcucaguagucaguguagauccugucuuuacaaucagcagcuacaucuggcuacugggucuc	cgcucaguagucaguguagauccugucuuuacaaucagcagcuacaucuggcuacugggucuc	cgcucaguagucaguguagauccugucuuuacaaucagcagcuacaucuggcuacugggucuc	cgcucaguagucaguguagauccugucuuuacaaucagcagcuacaucuggcuacugggucuc	cgcucaguagucaguguagaucc	cgcucaguagucaguguagaucc	cgcucaguagucaguguagaucc	cgcucaguagucaguguagaucc	cgcucaguagucaguguagaucc	cgcucaguagucaguguagaucc	cgcucaguagucaguguagaucc	cgcucaguagucaguguagaucc	cgcucaguagucaguguagaucc	793	449	601	106	147	107	99	88	55	96.2633	56.8573	60.946	12.7683	17.593	12.2152	10.4527	9.85318	4.95599
179	cli-miR-22-3p	aguucuucaguggcaagcuuuauguccuucucuaguagcuaaagcugccaguugaagaacugu	aguucuucaguggcaagcuuuauguccuucucuaguagcuaaagcugccaguugaagaacugu	aguucuucaguggcaagcuuuauguccuucucuaguagcuaaagcugccaguugaagaacugu	aguucuucaguggcaagcuuuauguccuucucuaguagcuaaagcugccaguugaagaacugu	aguucuucaguggcaagcuuuauguccuucucuaguagcuaaagcugccaguugaagaacugu	aguucuucaguggcaagcuuuauguccuucucuaguagcuaaagcugccaguugaagaacugu	aguucuucaguggcaagcuuuauguccuucucuaguagcuaaagcugccaguugaagaacugu	aguucuucaguggcaagcuuuauguccuucucuaguagcuaaagcugccaguugaagaacugu	aguucuucaguggcaagcuuuauguccuucucuaguagcuaaagcugccaguugaagaacugu	aagcugccaguugaagaacugu	aagcugccaguugaagaacugu	aagcugccaguugaagaacugu	aagcugccaguugaagaacugu	aagcugccaguugaagaacugu	aagcugccaguugaagaacugu	aagcugccaguugaagaacugu	aagcugccaguugaagaacugu	aagcugccaguugaagaacugu	86211	57078	59947	251065	297021	358607	362989	287077	419788	10465.3	7227.84	6079.08	30242.1	35547.5	40938.8	38325.4	32143.4	37826.6
180	cli-miR-22-5p	aguucuucaguggcaagcuuuauguccuucucuaguagcuaaagcugccaguugaagaacugu	aguucuucaguggcaagcuuuauguccuucucuaguagcuaaagcugccaguugaagaacugu	aguucuucaguggcaagcuuuauguccuucucuaguagcuaaagcugccaguugaagaacugu	aguucuucaguggcaagcuuuauguccuucucuaguagcuaaagcugccaguugaagaacugu	aguucuucaguggcaagcuuuauguccuucucuaguagcuaaagcugccaguugaagaacugu	aguucuucaguggcaagcuuuauguccuucucuaguagcuaaagcugccaguugaagaacugu	aguucuucaguggcaagcuuuauguccuucucuaguagcuaaagcugccaguugaagaacugu	aguucuucaguggcaagcuuuauguccuucucuaguagcuaaagcugccaguugaagaacugu	aguucuucaguggcaagcuuuauguccuucucuaguagcuaaagcugccaguugaagaacugu	aguucuucaguggcaagcuuua	aguucuucaguggcaagcuuu	aguucuucaguggcaagcuuua	aguucuucaguggcaagcuuu	aguucuucaguggcaagcuuu	aguucuucaguggcaagcuuu	aguucuucaguggcaagcuuu	aguucuucaguggcaagcuuu	aguucuucaguggcaagcuuu	56	39	30	126	170	237	193	218	182	6.79791	4.93861	3.04223	15.1774	20.3456	27.056	20.3775	24.409	16.3998
181	cli-miR-23b-3p	gguuccuggcaugaugauuugugacuuaagauuaaaaucacauugccagggauuacca	uggguuccuggcaugaugauuugugacuuaagauuaaaaucacauugccagggauuacca	ggguuccuggcaugaugauuugugacuuaagauuaaaaucacauugccagggauuacca	ggguuccuggcaugaugauuugugacuuaagauuaaaaucacauugccagggauuacc	gguuccuggcaugaugauuugugacuuaagauuaaaaucacauugccagggauuacca	gguuccuggcaugaugauuugugacuuaagauuaaaaucacauugccagggauuacca	gguuccuggcaugaugauuugugacuuaagauuaaaaucacauugccagggauuacca	uggguuccuggcaugaugauuugugacuuaagauuaaaaucacauugccagggauuacca	uggguuccuggcaugaugauuugugacuuaagauuaaaaucacauugccagggauuacca	aucacauugccagggauuacca	aucacauugccagggauuacca	aucacauugccagggauuacca	aucacauugccagggauuacc	aucacauugccagggauuacca	aucacauugccagggauuacca	aucacauugccagggauuacca	aucacauugccagggauuacca	aucacauugccagggauuacca	5394	3788	4091	3468	5282	6099	4219	4015	3310	654.785	479.678	414.859	417.739	632.15	696.265	445.454	449.551	298.261
182	cli-miR-23b-5p	gguuccuggcaugaugauuugugacuuaagauuaaaaucacauugccagggauuacca	uggguuccuggcaugaugauuugugacuuaagauuaaaaucacauugccagggauuacca	ggguuccuggcaugaugauuugugacuuaagauuaaaaucacauugccagggauuacca	ggguuccuggcaugaugauuugugacuuaagauuaaaaucacauugccagggauuacc	gguuccuggcaugaugauuugugacuuaagauuaaaaucacauugccagggauuacca	gguuccuggcaugaugauuugugacuuaagauuaaaaucacauugccagggauuacca	gguuccuggcaugaugauuugugacuuaagauuaaaaucacauugccagggauuacca	uggguuccuggcaugaugauuugugacuuaagauuaaaaucacauugccagggauuacca	uggguuccuggcaugaugauuugugacuuaagauuaaaaucacauugccagggauuacca	gguuccuggcaugaugauuu	uggguuccuggcaugaugauuu	ggguuccuggcaugaugauuu	ggguuccuggcaugaugauuu	gguuccuggcaugaugauuu	gguuccuggcaugaugauuu	gguuccuggcaugaugauuu	uggguuccuggcaugaugauuu	uggguuccuggcaugaugauuu	0	2	1	1	0	0	0	2	2	0	0.253262	0.101408	0.120455	0	0	0	0.223936	0.180218
183	cli-miR-26-3p	uucaaguaauccaggauaggcugugaucugggcagucagccuguucuugguuacuuggcuc	uucaaguaauccaggauaggcugugaucugggcagucagccuguucuugguuacuuggcuc	uucaaguaauccaggauaggcugugaucugggcagucagccuguucuugguuacuuggcuc	uucaaguaauccaggauaggcugugaucugggcagucagccuguucuugguuacuuggcuc	uucaaguaauccaggauaggcugugaucugggcagucagccuguucuugguuacuuggcuc	uucaaguaauccaggauaggcugugaucugggcagucagccuguucuugguuacuuggcuc	uucaaguaauccaggauaggcuguauccauccgagcuggccuauucuugguuacuugcacu	uucaaguaauccaggauaggcuguauccauccgagcuggccuauucuugguuacuugcacu	uucaaguaauccaggauaggcuguauccauccgagcuggccuauucuugguuacuugcacu	ccuguucuugguuacuuggcuc	ccuguucuugguuacuuggcuc	ccuguucuugguuacuuggcuc	ccuguucuugguuacuuggcuc	ccuguucuugguuacuuggcuc	ccuguucuugguuacuuggcuc	ccuauucuugguuacuugcacu	ccuauucuugguuacuugcacu	ccuauucuugguuacuugcacu	831	492	539	64	266	109	14	9	19	100.876	62.3024	54.6587	7.70915	31.8349	12.4435	1.47816	1.00771	1.71207
184	cli-miR-26-5p	uucaaguaauccaggauaggcugugaucugggcagucagccuguucuugguuacuuggcuc	uucaaguaauccaggauaggcugugaucugggcagucagccuguucuugguuacuuggcuc	uucaaguaauccaggauaggcugugaucugggcagucagccuguucuugguuacuuggcuc	uucaaguaauccaggauaggcugugaucugggcagucagccuguucuugguuacuuggcuc	uucaaguaauccaggauaggcugugaucugggcagucagccuguucuugguuacuuggcuc	uucaaguaauccaggauaggcugugaucugggcagucagccuguucuugguuacuuggcuc	uucaaguaauccaggauaggcuguauccauccgagcuggccuauucuugguuacuugcacu	uucaaguaauccaggauaggcuguauccauccgagcuggccuauucuugguuacuugcacu	uucaaguaauccaggauaggcuguauccauccgagcuggccuauucuugguuacuugcacu	uucaaguaauccaggauaggcu	uucaaguaauccaggauaggcu	uucaaguaauccaggauaggcu	uucaaguaauccaggauaggcu	uucaaguaauccaggauaggcu	uucaaguaauccaggauaggcu	uucaaguaauccaggauaggcu	uucaaguaauccaggauaggcu	uucaaguaauccaggauaggcu	1098765	1409083	1818925	551709	757673	803854	895493	993168	1082042	133381	178433	184453	66456.3	90678.4	91768.4	94548.7	111203	97501.6
185	cli-miR-27b-3p	agagcuuagcugauuggugaacagugauuguuucccucuuuguucacaguggcuaaguucugc	agagcuuagcugauuggugaacagugauuguuucccucuuuguucacaguggcuaaguucugc	agagcuuagcugauuggugaacagugauuguuucccucuuuguucacaguggcuaaguucugc	agagcuuagcugauuggugaacagugauuguuucccucuuuguucacaguggcuaaguucugc	agagcuuagcugauuggugaacagugauuguuucccucuuuguucacaguggcuaaguucugc	agagcuuagcugauuggugaacagugauuguuucccucuuuguucacaguggcuaaguucugc	agagcuuagcugauuggugaacagugauuguuucccucuuuguucacaguggcuaaguucugc	agagcuuagcugauuggugaacagugauuguuucccucuuuguucacaguggcuaaguucugc	agagcuuagcugauuggugaacagugauuguuucccucuuuguucacaguggcuaaguucugc	uucacaguggcuaaguucugc	uucacaguggcuaaguucugc	uucacaguggcuaaguucugc	uucacaguggcuaaguucugc	uucacaguggcuaaguucugc	uucacaguggcuaaguucugc	uucacaguggcuaaguucugc	uucacaguggcuaaguucugc	uucacaguggcuaaguucugc	36917	28888	23961	21348	25097	24370	29346	28870	18976	4481.4	3658.11	2429.83	2571.48	3003.61	2782.09	3098.43	3232.52	1709.91
186	cli-miR-27b-5p	agagcuuagcugauuggugaacagugauuguuucccucuuuguucacaguggcuaaguucugc	agagcuuagcugauuggugaacagugauuguuucccucuuuguucacaguggcuaaguucugc	agagcuuagcugauuggugaacagugauuguuucccucuuuguucacaguggcuaaguucugc	agagcuuagcugauuggugaacagugauuguuucccucuuuguucacaguggcuaaguucugc	agagcuuagcugauuggugaacagugauuguuucccucuuuguucacaguggcuaaguucugc	agagcuuagcugauuggugaacagugauuguuucccucuuuguucacaguggcuaaguucugc	agagcuuagcugauuggugaacagugauuguuucccucuuuguucacaguggcuaaguucugc	agagcuuagcugauuggugaacagugauuguuucccucuuuguucacaguggcuaaguucugc	agagcuuagcugauuggugaacagugauuguuucccucuuuguucacaguggcuaaguucugc	agagcuuagcugauuggugaac	agagcuuagcugauuggugaac	agagcuuagcugauuggugaac	agagcuuagcugauuggugaac	agagcuuagcugauuggugaac	agagcuuagcugauuggugaac	agagcuuagcugauuggugaac	agagcuuagcugauuggugaac	agagcuuagcugauuggugaac	547	306	299	98	226	170	196	206	97	66.4011	38.7491	30.3209	11.8046	27.0477	19.4073	20.6942	23.0654	8.74056
187	cli-miR-2954-3p	ugcugagagggcuuggggagaggauuguaguggagcuccauccccauuccacuccuagcag	ugcugagagggcuuggggagaggauuguaguggagcuccauccccauuccacuccuagcag	ugcugagagggcuuggggagaggauuguaguggagcuccauccccauuccacuccuagcag	ugcugagagggcuuggggagaggauuguaguggagcuccauccccauuccacuccuagcagc	ugcugagagggcuuggggagaggauuguaguggagcuccauccccauuccacuccuagcag	ugcugagagggcuuggggagaggauuguaguggagcuccauccccauuccacuccuagca	ugcugagagggcuuggggagaggauuguaguggagcuccauccccauuccacuccuagcagc	ugcugagagggcuuggggagaggauuguaguggagcuccauccccauuccacuccuagcagc	ugcugagagggcuuggggagaggauuguaguggagcuccauccccauuccacuccuagcagc	cauccccauuccacuccuagcag	cauccccauuccacuccuagcag	cauccccauuccacuccuagcag	cauccccauuccacuccuagcagc	cauccccauuccacuccuagcag	cauccccauuccacuccuagca	cauccccauuccacuccuagcagc	cauccccauuccacuccuagcagc	cauccccauuccacuccuagcagc	18886	14362	17347	12777	14474	12353	8273	9379	7940	2292.6	1818.67	1759.12	1539.06	1732.25	1410.22	873.487	1050.15	715.465
188	cli-miR-2954-5p	ugcugagagggcuuggggagaggauuguaguggagcuccauccccauuccacuccuagcag	ugcugagagggcuuggggagaggauuguaguggagcuccauccccauuccacuccuagcag	ugcugagagggcuuggggagaggauuguaguggagcuccauccccauuccacuccuagcag	ugcugagagggcuuggggagaggauuguaguggagcuccauccccauuccacuccuagcagc	ugcugagagggcuuggggagaggauuguaguggagcuccauccccauuccacuccuagcag	ugcugagagggcuuggggagaggauuguaguggagcuccauccccauuccacuccuagca	ugcugagagggcuuggggagaggauuguaguggagcuccauccccauuccacuccuagcagc	ugcugagagggcuuggggagaggauuguaguggagcuccauccccauuccacuccuagcagc	ugcugagagggcuuggggagaggauuguaguggagcuccauccccauuccacuccuagcagc	ugcugagagggcuuggggagagga	ugcugagagggcuuggggagagga	ugcugagagggcuuggggagagga	ugcugagagggcuuggggagagga	ugcugagagggcuuggggagagga	ugcugagagggcuuggggagagga	ugcugagagggcuuggggagagga	ugcugagagggcuuggggagagga	ugcugagagggcuuggggagagga	410	178	247	47	153	99	89	61	95	49.7704	22.5403	25.0477	5.66141	18.3111	11.3019	9.39687	6.83005	8.56035
189	cli-miR-2970-3p	cugcccugccgguguguccccccccaggcagggguccaggacagcuccugcccugcggacagucagcaguuggucuggu	cugcccugccgguguguccccccccaggcagggguccaggacagcuccugcccugcggacagucagcaguuggucuggu	cugcccugccgguguguccccccccaggcagggguccaggacagcuccugcccugcggacagucagcaguuggucuggu	cugcccugccgguguguccccccccaggcagggguccaggacagcuccugcccugcggacagucagcaguuggucuggu	ccgguguguccccccccaggcagggguccaggacagcuccugcccugcggacagucagcaguuggucuggu	cugcccugccgguguguccccccccaggcagggguccaggacagcuccugcccugcggacagucagcaguuggucuggu	cugcccugccgguguguccccccccaggcagggguccaggacagcuccugcccugcggacagucagcaguuggucuggu	cugcccugccgguguguccccccccaggcagggguccaggacagcuccugcccugcggacagucagcaguuggucuggu	cugcccugccgguguguccccccccaggcagggguccaggacagcuccugcccugcggacagucagcaguuggucuggu	gacagucagcaguuggucuggu	gacagucagcaguuggucuggu	gacagucagcaguuggucuggu	gacagucagcaguuggucuggu	gacagucagcaguuggucuggu	gacagucagcaguuggucuggu	gacagucagcaguuggucuggu	gacagucagcaguuggucuggu	gacagucagcaguuggucuggu	18232	13413	16455	12675	16042	15712	3939	4598	4257	2213.21	1698.5	1668.66	1526.77	1919.91	1793.69	415.891	514.829	383.594
190	cli-miR-29a-3p	gaccgauuucucuugguguucagagucucaguuuuugucuagcaccauuugaaaucgguua	accgauuucucuugguguucagagucucaguuuuugucuagcaccauuugaaaucgguua	accgauuucucuugguguucagagucucaguuuuugucuagcaccauuugaaaucgguua	gaccgauuucucuugguguucagagucucaguuuuugucuagcaccauuugaaaucgguua	gaccgauuucucuugguguucagagucucaguuuuugucuagcaccauuugaaaucgguua	acugauuucuuuugguguucagagucaauaauauuuucuagcaccauuugaaaucgguu	ugaccgauuucucuugguguucagagucucaguuuuugucuagcaccauuugaaaucgguua	ugaccgauuucucuugguguucagagucucaguuuuugucuagcaccauuugaaaucgguua	accgauuucucuugguguucagagucucaguuuuugucuagcaccauuugaaaucgguua	uagcaccauuugaaaucgguua	uagcaccauuugaaaucgguua	uagcaccauuugaaaucgguua	uagcaccauuugaaaucgguua	uagcaccauuugaaaucgguua	uagcaccauuugaaaucgguu	uagcaccauuugaaaucgguua	uagcaccauuugaaaucgguua	uagcaccauuugaaaucgguua	313	287	322	890	905	2484	10050	7831	5298	37.9955	36.3431	32.6532	107.205	108.31	283.575	1061.11	876.821	477.397
191	cli-miR-29a-5p	gaccgauuucucuugguguucagagucucaguuuuugucuagcaccauuugaaaucgguua	accgauuucucuugguguucagagucucaguuuuugucuagcaccauuugaaaucgguua	accgauuucucuugguguucagagucucaguuuuugucuagcaccauuugaaaucgguua	gaccgauuucucuugguguucagagucucaguuuuugucuagcaccauuugaaaucgguua	gaccgauuucucuugguguucagagucucaguuuuugucuagcaccauuugaaaucgguua	acugauuucuuuugguguucagagucaauaauauuuucuagcaccauuugaaaucgguu	ugaccgauuucucuugguguucagagucucaguuuuugucuagcaccauuugaaaucgguua	ugaccgauuucucuugguguucagagucucaguuuuugucuagcaccauuugaaaucgguua	accgauuucucuugguguucagagucucaguuuuugucuagcaccauuugaaaucgguua	gaccgauuucucuugguguucag	accgauuucucuugguguucag	accgauuucucuugguguucaga	gaccgauuucucuugguguu	gaccgauuucucuugguguucagagucuc	acugauuucuuuugguguucaga	ugaccgauuucucuugguguucag	ugaccgauuucucuugguguuca	accgauuucucuugguguucaga	1	1	0	1	1	9	45	14	19	0.121391	0.126631	0	0.120455	0.11968	1.02744	4.75123	1.56755	1.71207
192	cli-miR-29b-3p	cugguuucauauggugguuuagauuuaacuauucauugucuagcaccauuugaaaucagug	cugguuucauauggugguuuagauuuaacuauucauugucuagcaccauuugaaaucaguguu	cugguuucacaugguggcuuagauuuucccacuuuguaucuagcaccauuugaaaucaguguu	cugguuucauauggugguuuagauuuaacuauucauugucuagcaccauuugaaaucaguguu	cugguuucacaugguggcuuagauuuucccacuuuguaucuagcaccauuugaaaucaguguu	cugguuucacaugguggcuuagauuuucccacuuuguaucuagcaccauuugaaaucaguguu	cugguuucacaugguggcuuagauuuucccacuuuguaucuagcaccauuugaaaucagug	cugguuucacaugguggcuuagauuuucccacuuuguaucuagcaccauuugaaaucagu	cugguuucacaugguggcuuagauuuucccacuuuguaucuagcaccauuugaaaucagug	cuagcaccauuugaaaucagug	uagcaccauuugaaaucaguguu	uagcaccauuugaaaucaguguu	uagcaccauuugaaaucaguguu	uagcaccauuugaaaucaguguu	uagcaccauuugaaaucaguguu	cuagcaccauuugaaaucagug	cuagcaccauuugaaaucagu	cuagcaccauuugaaaucagug	35	19	26	86	105	311	1231	991	756	4.2487	2.40599	2.6366	10.3592	12.5664	35.5039	129.972	110.96	68.1223
193	cli-miR-29b-5p	cugguuucauauggugguuuagauuuaacuauucauugucuagcaccauuugaaaucagug	cugguuucauauggugguuuagauuuaacuauucauugucuagcaccauuugaaaucaguguu	cugguuucacaugguggcuuagauuuucccacuuuguaucuagcaccauuugaaaucaguguu	cugguuucauauggugguuuagauuuaacuauucauugucuagcaccauuugaaaucaguguu	cugguuucacaugguggcuuagauuuucccacuuuguaucuagcaccauuugaaaucaguguu	cugguuucacaugguggcuuagauuuucccacuuuguaucuagcaccauuugaaaucaguguu	cugguuucacaugguggcuuagauuuucccacuuuguaucuagcaccauuugaaaucagug	cugguuucacaugguggcuuagauuuucccacuuuguaucuagcaccauuugaaaucagu	cugguuucacaugguggcuuagauuuucccacuuuguaucuagcaccauuugaaaucagug	cugguuucauauggugguuua	cugguuucauauggugguuuaga	cugguuucacaugguggcuuagau	cugguuucauauggugguuuaga	cugguuucacaugguggcuuag	cugguuucacaugguggcuuaga	cugguuucacaugguggcuuagau	cugguuucacaugguggcuuaga	cugguuucacaugguggcuuaga	3	1	1	1	1	6	35	23	18	0.364174	0.126631	0.101408	0.120455	0.11968	0.684963	3.6954	2.57526	1.62196
194	cli-miR-301a-3p	gcucugacuuuauugcacuacuguacuucccagcuagcagugcaauaguauugucaaagc	gcucugacuuuauugcacuacuguacuucccagcuagcagugcaauaguauugucaaagc	gcucugacuuuauugcacuacuguacuucccagcuagcagugcaauaguauugucaaagc	gcucugacuuuauugcacuacuguacuucccagcuagcagugcaauaguauugucaaagc	gcucugacuuuauugcacuacuguacuucccagcuagcagugcaauaguauugucaaagc	gcucugacuuuauugcacuacuguacuucccagcuagcagugcaauaguauugucaaagc	gcucugacuuuauugcacuacuguacuucccagcuagcagugcaauaguauugucaaagc	gcucugacuuuauugcacuacuguacuucccagcuagcagugcaauaguauugucaaagc	gcucugacuuuauugcacuacuguacuucccagcuagcagugcaauaguauugucaaagc	cagugcaauaguauugucaaagc	cagugcaauaguauugucaaagc	cagugcaauaguauugucaaagc	cagugcaauaguauugucaaagc	cagugcaauaguauugucaaagc	cagugcaauaguauugucaaagc	cagugcaauaguauugucaaagc	cagugcaauaguauugucaaagc	cagugcaauaguauugucaaagc	11147	7232	11703	3969	8414	4630	1882	1319	1491	1353.15	915.795	1186.77	478.088	1006.99	528.563	198.707	147.686	134.352
195	cli-miR-301a-5p	gcucugacuuuauugcacuacuguacuucccagcuagcagugcaauaguauugucaaagc	gcucugacuuuauugcacuacuguacuucccagcuagcagugcaauaguauugucaaagc	gcucugacuuuauugcacuacuguacuucccagcuagcagugcaauaguauugucaaagc	gcucugacuuuauugcacuacuguacuucccagcuagcagugcaauaguauugucaaagc	gcucugacuuuauugcacuacuguacuucccagcuagcagugcaauaguauugucaaagc	gcucugacuuuauugcacuacuguacuucccagcuagcagugcaauaguauugucaaagc	gcucugacuuuauugcacuacuguacuucccagcuagcagugcaauaguauugucaaagc	gcucugacuuuauugcacuacuguacuucccagcuagcagugcaauaguauugucaaagc	gcucugacuuuauugcacuacuguacuucccagcuagcagugcaauaguauugucaaagc	gcucugacuuuauugcacuacu	gcucugacuuuauugcacuacu	gcucugacuuuauugcacuacu	gcucugacuuuauugcacuacu	gcucugacuuuauugcacuacu	gcucugacuuuauugcacuacu	gcucugacuuuauugcacuacu	gcucugacuuuauugcacuacu	gcucugacuuuauugcacuacu	35	20	20	5	26	12	5	9	10	4.2487	2.53262	2.02815	0.602277	3.11168	1.36993	0.527914	1.00771	0.901089
196	cli-miR-301b-3p	ucugacaauguugcacuacugucugcacaaauaaagcagugcaauaauauugucaaagc	ucugacaauguugcacuacugucugcacaaauaaagcagugcaauaauauugucaaagc	ucugacaauguugcacuacugucugcacaaauaaagcagugcaauaauauugucaaagc	ucugacaauguugcacuacugucugcacaaauaaagcagugcaauaauauugucaaagc	ucugacaauguugcacuacugucugcacaaauaaagcagugcaauaauauugucaaagc	ucugacaauguugcacuacugucugcacaaauaaagcagugcaauaauauugucaaagc	ucugacaauguugcacuacugucugcacaaauaaagcagugcaauaauauugucaaagc	ucugacaauguugcacuacugucugcacaaauaaagcagugcaauaauauugucaaagc	ucugacaauguugcacuacugucugcacaaauaaagcagugcaauaauauugucaaagc	cagugcaauaauauugucaaagc	cagugcaauaauauugucaaagc	cagugcaauaauauugucaaagc	cagugcaauaauauugucaaagc	cagugcaauaauauugucaaagc	cagugcaauaauauugucaaagc	cagugcaauaauauugucaaagc	cagugcaauaauauugucaaagc	cagugcaauaauauugucaaagc	14629	9824	14935	711	1344	906	149	116	141	1775.83	1244.02	1514.52	85.6438	160.85	103.429	15.7318	12.9883	12.7054
197	cli-miR-301b-5p	ucugacaauguugcacuacugucugcacaaauaaagcagugcaauaauauugucaaagc	ucugacaauguugcacuacugucugcacaaauaaagcagugcaauaauauugucaaagc	ucugacaauguugcacuacugucugcacaaauaaagcagugcaauaauauugucaaagc	ucugacaauguugcacuacugucugcacaaauaaagcagugcaauaauauugucaaagc	ucugacaauguugcacuacugucugcacaaauaaagcagugcaauaauauugucaaagc	ucugacaauguugcacuacugucugcacaaauaaagcagugcaauaauauugucaaagc	ucugacaauguugcacuacugucugcacaaauaaagcagugcaauaauauugucaaagc	ucugacaauguugcacuacugucugcacaaauaaagcagugcaauaauauugucaaagc	ucugacaauguugcacuacugucugcacaaauaaagcagugcaauaauauugucaaagc	ucugacaauguugcacuacu	ucugacaauguugcacuacu	ucugacaauguugcacuacu	ucugacaauguugcacuacu	ucugacaauguugcacuacu	ucugacaauguugcacuacu	ucugacaauguugcacuacu	ucugacaauguugcacuacu	ucugacaauguugcacuacu	89	46	33	3	10	6	0	1	2	10.8038	5.82502	3.34645	0.361366	1.1968	0.684963	0	0.111968	0.180218
198	cli-miR-302a-3p	null	null	null	null	null	cuuaaauguggauguacuugcuuuguuccugaaaaguaagugcuuccauguuuuggug	null	null	null	null	null	null	null	null	uaagugcuuccauguuuuggug	null	null	null	0	0	0	0	0	4	0	0	0	0	0	0	0	0	0.456642	0	0	0
199	cli-miR-302b-3p	uuuaacauggaggugcuuucugugacuuaaaagaaguaagugcuuccauguuuuagu	null	null	null	null	null	null	null	null	uaagugcuuccauguuuuagu	null	null	null	null	null	null	null	null	2	0	0	0	0	0	0	0	0	0.242783	0	0	0	0	0	0	0	0
200	cli-miR-30a-3p	uguaaacauccucgacuggaagcugugaagcagcagauggggcuuucagucggauguuugcagc	uguaaacauccucgacuggaagcugugaagcagcagauggggcuuucagucggauguuugcagc	uguaaacauccucgacuggaagcugugaagcagcagauggggcuuucagucggauguuugcagc	uguaaacauccucgacuggaagcugugaagcagcagauggggcuuucagucggauguuugcagc	uguaaacauccucgacuggaagcugugaagcagcagauggggcuuucagucggauguuugcagc	uguaaacauccucgacuggaagcugugaagcagcagauggggcuuucagucggauguuugcagc	uguaaacauccucgacuggaagcugugaagcagcagauggggcuuucagucggauguuugcagc	uguaaacauccucgacuggaagcugugaagcagcagauggggcuuucagucggauguuugcagc	uguaaacauccucgacuggaagcugugaagcagcagauggggcuuucagucggauguuugcagc	cuuucagucggauguuugcagc	cuuucagucggauguuugcagc	cuuucagucggauguuugcagc	cuuucagucggauguuugcagc	cuuucagucggauguuugcagc	cuuucagucggauguuugcagc	cuuucagucggauguuugcagc	cuuucagucggauguuugcagc	cuuucagucggauguuugcagc	13286	7537	8130	10813	20040	11682	12567	12873	10261	1612.81	954.417	824.444	1302.48	2398.39	1333.62	1326.86	1441.36	924.608
201	cli-miR-30a-5p	uguaaacauccucgacuggaagcugugaagcagcagauggggcuuucagucggauguuugcagc	uguaaacauccucgacuggaagcugugaagcagcagauggggcuuucagucggauguuugcagc	uguaaacauccucgacuggaagcugugaagcagcagauggggcuuucagucggauguuugcagc	uguaaacauccucgacuggaagcugugaagcagcagauggggcuuucagucggauguuugcagc	uguaaacauccucgacuggaagcugugaagcagcagauggggcuuucagucggauguuugcagc	uguaaacauccucgacuggaagcugugaagcagcagauggggcuuucagucggauguuugcagc	uguaaacauccucgacuggaagcugugaagcagcagauggggcuuucagucggauguuugcagc	uguaaacauccucgacuggaagcugugaagcagcagauggggcuuucagucggauguuugcagc	uguaaacauccucgacuggaagcugugaagcagcagauggggcuuucagucggauguuugcagc	uguaaacauccucgacuggaagcu	uguaaacauccucgacuggaagcu	uguaaacauccucgacuggaagcu	uguaaacauccucgacuggaagcu	uguaaacauccucgacuggaagcu	uguaaacauccucgacuggaagcu	uguaaacauccucgacuggaagcu	uguaaacauccucgacuggaagcu	uguaaacauccucgacuggaagcu	349768	340795	358743	355018	357568	284074	709957	617167	881784	42458.8	43155.2	36379.3	42763.8	42793.8	32430	74959.3	69102.9	79456.6
202	cli-miR-30c-3p	uguaaacauccuacacucucagcuguggaaacuaagaaagcugggagaaggcuguuuacucu	uguaaacauccuacacucucagcuguggaaacuaagaaagcugggagaaggcuguuuacucu	uguaaacauccuacacucucagcuguggaaacuaagaaagcugggagaaggcuguuuacucu	uguaaacauccuacacucucagcuguggaaacuaagaaagcugggagaaggcuguuuacucu	uguaaacauccuacacucucagcuguggaaacuaagaaagcugggagaaggcuguuuacucu	uguaaacauccuacacucucagcuguggaaacuaagaaagcugggagaaggcuguuuacucu	uguaaacauccuacacucucagcuguggaaacuaagaaagcugggagaaggcuguuuacucu	uguaaacauccuacacucucagcuguggaaacuaagaaagcugggagaaggcuguuuacucu	uguaaacauccuacacucucagcuguggaaacuaagaaagcugggagaaggcuguuuacucu	cugggagaaggcuguuuacucu	cugggagaaggcuguuuacucu	cugggagaaggcuguuuacucu	cugggagaaggcuguuuacucu	cugggagaaggcuguuuacucu	cugggagaaggcuguuuacucu	cugggagaaggcuguuuacucu	cugggagaaggcuguuuacucu	cugggagaaggcuguuuacucu	1287	659	670	595	1036	520	895	755	861	156.231	83.4498	67.9431	71.671	123.989	59.3635	94.4966	84.5358	77.5838
203	cli-miR-30c-5p	uguaaacauccuacacucucagcuguggaaacuaagaaagcugggagaaggcuguuuacucu	uguaaacauccuacacucucagcuguggaaacuaagaaagcugggagaaggcuguuuacucu	uguaaacauccuacacucucagcuguggaaacuaagaaagcugggagaaggcuguuuacucu	uguaaacauccuacacucucagcuguggaaacuaagaaagcugggagaaggcuguuuacucu	uguaaacauccuacacucucagcuguggaaacuaagaaagcugggagaaggcuguuuacucu	uguaaacauccuacacucucagcuguggaaacuaagaaagcugggagaaggcuguuuacucu	uguaaacauccuacacucucagcuguggaaacuaagaaagcugggagaaggcuguuuacucu	uguaaacauccuacacucucagcuguggaaacuaagaaagcugggagaaggcuguuuacucu	uguaaacauccuacacucucagcuguggaaacuaagaaagcugggagaaggcuguuuacucu	uguaaacauccuacacucucagcu	uguaaacauccuacacucucagcu	uguaaacauccuacacucucagcu	uguaaacauccuacacucucagcu	uguaaacauccuacacucucagcu	uguaaacauccuacacucucagcu	uguaaacauccuacacucucagcu	uguaaacauccuacacucucagcu	uguaaacauccuacacucucagcu	41176	39927	43304	66674	135906	78752	107545	79677	140557	4998.41	5055.99	4391.36	8031.25	16265.2	8990.37	11354.9	8921.27	12665.4
204	cli-miR-30d-3p	uguaaacauccccgacuggaagcuguucccguccagcuuucagucagauguuugcugc	uguaaacauccccgacuggaagcuguucccguccagcuuucagucagauguuugcugc	uguaaacauccccgacuggaagcuguucccguccagcuuucagucagauguuugcugc	uguaaacauccccgacuggaagcuguucccguccagcuuucagucagauguuugcugc	uguaaacauccccgacuggaagcuguucccguccagcuuucagucagauguuugcugc	uguaaacauccccgacuggaagcuguucccguccagcuuucagucagauguuugcugc	uguaaacauccccgacuggaagcuguucccguccagcuuucagucagauguuugcugc	uguaaacauccccgacuggaagcuguucccguccagcuuucagucagauguuugcugc	uguaaacauccccgacuggaagcuguucccguccagcuuucagucagauguuugcugc	cuuucagucagauguuugcugc	cuuucagucagauguuugcugc	cuuucagucagauguuugcugc	cuuucagucagauguuugcugc	cuuucagucagauguuugcugc	cuuucagucagauguuugcugc	cuuucagucagauguuugcugc	cuuucagucagauguuugcugc	cuuucagucagauguuugcugc	4250	2507	3496	946	1506	930	884	945	735	515.913	317.464	354.521	113.951	180.238	106.169	93.3352	105.81	66.2301
205	cli-miR-30d-5p	uguaaacauccccgacuggaagcuguucccguccagcuuucagucagauguuugcugc	uguaaacauccccgacuggaagcuguucccguccagcuuucagucagauguuugcugc	uguaaacauccccgacuggaagcuguucccguccagcuuucagucagauguuugcugc	uguaaacauccccgacuggaagcuguucccguccagcuuucagucagauguuugcugc	uguaaacauccccgacuggaagcuguucccguccagcuuucagucagauguuugcugc	uguaaacauccccgacuggaagcuguucccguccagcuuucagucagauguuugcugc	uguaaacauccccgacuggaagcuguucccguccagcuuucagucagauguuugcugc	uguaaacauccccgacuggaagcuguucccguccagcuuucagucagauguuugcugc	uguaaacauccccgacuggaagcuguucccguccagcuuucagucagauguuugcugc	uguaaacauccccgacuggaagcu	uguaaacauccccgacuggaagcu	uguaaacauccccgacuggaagcu	uguaaacauccccgacuggaagcu	uguaaacauccccgacuggaagcu	uguaaacauccccgacuggaagcu	uguaaacauccccgacuggaagcu	uguaaacauccccgacuggaagcu	uguaaacauccccgacuggaagcu	261844	201042	320104	322190	426199	349581	414397	355681	517117	31785.6	25458.1	32461	38809.5	51007.5	39908.3	43753.2	39824.9	46596.9
206	cli-miR-30e-3p	uguaaacauccuugacuggaagcugugaggugcgagcaggagcuuucagucggauguuugcagc	uguaaacauccuugacuggaagcugugaggugcgagcaggagcuuucagucggauguuugcagc	uguaaacauccuugacuggaagcugugaggugcgagcaggagcuuucagucggauguuugcagc	uguaaacauccuugacuggaagcugugaggugcgagcaggagcuuucagucggauguuugcagc	uguaaacauccuugacuggaagcugugaggugcgagcaggagcuuucagucggauguuugcagc	uguaaacauccuugacuggaagcugugaggugcgagcaggagcuuucagucggauguuugcagc	uguaaacauccuugacuggaagcugugaggugcgagcaggagcuuucagucggauguuugcagc	uguaaacauccuugacuggaagcugugaggugcgagcaggagcuuucagucggauguuugcagc	uguaaacauccuugacuggaagcugugaggugcgagcaggagcuuucagucggauguuugcagc	cuuucagucggauguuugcagc	cuuucagucggauguuugcagc	cuuucagucggauguuugcagc	cuuucagucggauguuugcagc	cuuucagucggauguuugcagc	cuuucagucggauguuugcagc	cuuucagucggauguuugcagc	cuuucagucggauguuugcagc	cuuucagucggauguuugcagc	12989	7393	7918	10445	19516	11464	12146	12432	9947	1576.75	936.182	802.945	1258.16	2335.68	1308.74	1282.41	1391.99	896.313
207	cli-miR-30e-5p	uguaaacauccuugacuggaagcugugaggugcgagcaggagcuuucagucggauguuugcagc	uguaaacauccuugacuggaagcugugaggugcgagcaggagcuuucagucggauguuugcagc	uguaaacauccuugacuggaagcugugaggugcgagcaggagcuuucagucggauguuugcagc	uguaaacauccuugacuggaagcugugaggugcgagcaggagcuuucagucggauguuugcagc	uguaaacauccuugacuggaagcugugaggugcgagcaggagcuuucagucggauguuugcagc	uguaaacauccuugacuggaagcugugaggugcgagcaggagcuuucagucggauguuugcagc	uguaaacauccuugacuggaagcugugaggugcgagcaggagcuuucagucggauguuugcagc	uguaaacauccuugacuggaagcugugaggugcgagcaggagcuuucagucggauguuugcagc	uguaaacauccuugacuggaagcugugaggugcgagcaggagcuuucagucggauguuugcagc	uguaaacauccuugacuggaagcu	uguaaacauccuugacuggaagcu	uguaaacauccuugacuggaagcu	uguaaacauccuugacuggaagcu	uguaaacauccuugacuggaagcu	uguaaacauccuugacuggaagcu	uguaaacauccuugacuggaagcu	uguaaacauccuugacuggaagcu	uguaaacauccuugacuggaagcu	428970	415270	533543	811080	827258	648214	1063236	980397	1249789	52073.2	52586	54105.3	97699	99006.3	74000.4	112259	109773	112617
208	cli-miR-31-3p	aggcaagauguuggcauagcuguagaccuaaaaaccugcuaugccaacauauugucauc	aggcaagauguuggcauagcuguagaccuaaaaaccugcuaugccaacauauugucauc	aggcaagauguuggcauagcuguagaccuaaaaaccugcuaugccaacauauugucauc	null	null	null	null	null	null	gcuaugccaacauauugucauc	gcuaugccaacauauugucauc	ugcuaugccaacauauugucauc	null	null	null	null	null	null	1	0	2	0	0	0	0	0	0	0.121391	0	0.202815	0	0	0	0	0	0
209	cli-miR-31-5p	aggcaagauguuggcauagcuguagaccuaaaaaccugcuaugccaacauauugucauc	aggcaagauguuggcauagcuguagaccuaaaaaccugcuaugccaacauauugucauc	aggcaagauguuggcauagcuguagaccuaaaaaccugcuaugccaacauauugucauc	null	null	null	null	null	null	aggcaagauguuggcauagcug	aggcaagauguuggcauagcug	aggcaagauguuggcauagcug	null	null	null	null	null	null	105	36	139	0	0	0	0	0	0	12.7461	4.55871	14.0957	0	0	0	0	0	0
210	cli-miR-32-3p	uauugcacauuacuaaguugcauguugucacggccucagugcaauuuagugugugcgauacu	uauugcacauuacuaaguugcauguugucacggccucagugcaauuuagugugugcgauacu	uauugcacauuacuaaguugcauguugucacggccucagugcaauuuagugugugcgauacu	uauugcacauuacuaaguugcauguugucacggccucagugcaauuuagugugugcgauacu	uauugcacauuacuaaguugcauguugucacggccucagugcaauuuagugugugcgauacu	uauugcacauuacuaaguugcauguugucacggccucagugcaauuuagugugugcgauacu	uauugcacauuacuaaguugcauguugucacggccucagugcaauuuagugugugcgauacu	uauugcacauuacuaaguugcauguugucacggccucagugcaauuuagugugugcgauacu	uauugcacauuacuaaguugcauguugucacggccucagugcaauuuagugugugcgauacu	caauuuagugugugcgauacu	caauuuagugugugcgauacu	caauuuagugugugcgauacu	caauuuagugugugcgauacu	caauuuagugugugcgauacu	caauuuagugugugcgauacu	caauuuagugugugcgauacu	caauuuagugugugcgauacu	caauuuagugugugcgauacu	25	16	18	13	15	15	14	8	13	3.03478	2.02609	1.82534	1.56592	1.7952	1.71241	1.47816	0.895744	1.17142
211	cli-miR-32-5p	uauugcacauuacuaaguugcauguugucacggccucagugcaauuuagugugugcgauacu	uauugcacauuacuaaguugcauguugucacggccucagugcaauuuagugugugcgauacu	uauugcacauuacuaaguugcauguugucacggccucagugcaauuuagugugugcgauacu	uauugcacauuacuaaguugcauguugucacggccucagugcaauuuagugugugcgauacu	uauugcacauuacuaaguugcauguugucacggccucagugcaauuuagugugugcgauacu	uauugcacauuacuaaguugcauguugucacggccucagugcaauuuagugugugcgauacu	uauugcacauuacuaaguugcauguugucacggccucagugcaauuuagugugugcgauacu	uauugcacauuacuaaguugcauguugucacggccucagugcaauuuagugugugcgauacu	uauugcacauuacuaaguugcauguugucacggccucagugcaauuuagugugugcgauacu	uauugcacauuacuaaguugc	uauugcacauuacuaaguugc	uauugcacauuacuaaguugc	uauugcacauuacuaaguugc	uauugcacauuacuaaguug	uauugcacauuacuaaguug	uauugcacauuacuaaguug	uauugcacauuacuaaguug	uauugcacauuacuaaguug	51	38	47	102	78	143	75	84	54	6.19096	4.81197	4.76616	12.2865	9.33505	16.325	7.91871	9.40531	4.86588
212	cli-miR-33-3p	gugcauuguaguugcauugcaugugucagacugggagugcaaugccccugccaugcagcc	gugcauuguaguugcauugcaugugucagacugggagugcaaugccccugccaugcagcc	gugcauuguaguugcauugcaugugucagacugggagugcaaugccccugccaugcagcc	gugcauuguaguugcauugcauguuguggcaguaacugugcaauguuccugcagugcagu	gugcauuguaguugcauugcauguuguggcaguaacugugcaauguuccugcagugcagu	gugcauuguaguugcauugcauguuguggcaguaacugugcaauguuccugcagugcagu	gugcauuguaguugcauugcauguuguggcaguaacugugcaauguuccugcagugcaguac	gugcauuguaguugcauugcauguuguggcaguaacugugcaauguuccugcagugcagu	gugcauuguaguugcauugcauguuguggcaguaacugugcaauguuccugcagugcagu	caaugccccugccaugcagcc	caaugccccugccaugcagcc	caaugccccugccaugcagcc	ugcaauguuccugcagugcagu	ugcaauguuccugcagugcagu	ugcaauguuccugcagugcagu	caauguuccugcagugcaguac	ugcaauguuccugcagugcagu	ugcaauguuccugcagugcagu	65	38	41	20	37	14	12	9	15	7.89044	4.81197	4.15771	2.40911	4.42816	1.59825	1.26699	1.00771	1.35163
213	cli-miR-33-5p	gugcauuguaguugcauugcaugugucagacugggagugcaaugccccugccaugcagcc	gugcauuguaguugcauugcaugugucagacugggagugcaaugccccugccaugcagcc	gugcauuguaguugcauugcaugugucagacugggagugcaaugccccugccaugcagcc	gugcauuguaguugcauugcauguuguggcaguaacugugcaauguuccugcagugcagu	gugcauuguaguugcauugcauguuguggcaguaacugugcaauguuccugcagugcagu	gugcauuguaguugcauugcauguuguggcaguaacugugcaauguuccugcagugcagu	gugcauuguaguugcauugcauguuguggcaguaacugugcaauguuccugcagugcaguac	gugcauuguaguugcauugcauguuguggcaguaacugugcaauguuccugcagugcagu	gugcauuguaguugcauugcauguuguggcaguaacugugcaauguuccugcagugcagu	gugcauuguaguugcauugca	gugcauuguaguugcauugca	gugcauuguaguugcauugca	gugcauuguaguugcauugca	gugcauuguaguugcauugca	gugcauuguaguugcauugca	gugcauuguaguugcauugc	gugcauuguaguugcauugca	gugcauuguaguugcauugca	569	305	397	363	304	217	251	307	169	69.0717	38.6224	40.2588	43.7253	36.3827	24.7728	26.5013	34.3742	15.2284
214	cli-miR-338a-3p	aacacuauccugaugcugucagaguaagugguaaagcuccagcaucagugauuuuguug	aacacuauccugaugcugucagaguaagugguaaagcuccagcaucagugauuuuguug	aacacuauccugaugcugucagaguaagugguaaagcuccagcaucagugauuuuguug	aacacuauccugaugcugucagaguaagugguaaagcuccagcaucagugauuuuguug	aacacuauccugaugcugucagaguaagugguaaagcuccagcaucagugauuuuguug	aacacuauccugaugcugucagaguaagugguaaagcuccagcaucagugauuuuguug	aacacuauccugaugcugucagaguaagugguaaagcuccagcaucagugauuuuguug	aacacuauccugaugcugucagaguaagugguaaagcuccagcaucagugauuuuguu	aacacuauccugaugcugucagaguaagugguaaagcuccagcaucagugauuuuguu	uccagcaucagugauuuuguug	uccagcaucagugauuuuguug	uccagcaucagugauuuuguug	uccagcaucagugauuuuguug	uccagcaucagugauuuuguug	uccagcaucagugauuuuguug	uccagcaucagugauuuuguug	uccagcaucagugauuuuguu	uccagcaucagugauuuuguu	541	392	546	572	841	685	500	530	432	65.6727	49.6393	55.3686	68.9005	100.651	78.1999	52.7914	59.343	38.9271
215	cli-miR-338a-5p	aacacuauccugaugcugucagaguaagugguaaagcuccagcaucagugauuuuguug	aacacuauccugaugcugucagaguaagugguaaagcuccagcaucagugauuuuguug	aacacuauccugaugcugucagaguaagugguaaagcuccagcaucagugauuuuguug	aacacuauccugaugcugucagaguaagugguaaagcuccagcaucagugauuuuguug	aacacuauccugaugcugucagaguaagugguaaagcuccagcaucagugauuuuguug	aacacuauccugaugcugucagaguaagugguaaagcuccagcaucagugauuuuguug	aacacuauccugaugcugucagaguaagugguaaagcuccagcaucagugauuuuguug	aacacuauccugaugcugucagaguaagugguaaagcuccagcaucagugauuuuguu	aacacuauccugaugcugucagaguaagugguaaagcuccagcaucagugauuuuguu	aacacuauccugaugcugucaga	aacacuauccugaugcugucaga	aacacuauccugaugcugucagagu	aacacuauccugaugcuguca	aacacuauccugaugcugucaga	aacacuauccugaugcugucaga	aacacuauccugaugcugucaga	aacacuauccugaugcugucagag	aacacuauccugaugcugucaga	16	8	14	3	7	3	3	1	3	1.94226	1.01305	1.41971	0.361366	0.83776	0.342482	0.316748	0.111968	0.270327
216	cli-miR-338b-3p	aacaauauccuggugcugagugaguugcagacagagacuccagcaucagugauuuuguug	aacaauauccuggugcugagugaguugcagacagagacuccagcaucagugauuuuguug	aacaauauccuggugcugagugaguugcagacagagacuccagcaucagugauuuuguug	aacaauauccuggugcugagugaguugcagacagagacuccagcaucagugauuuuguug	aacaauauccuggugcugagugaguugcagacagagacuccagcaucagugauuuuguug	aacaauauccuggugcugagugaguugcagacagagacuccagcaucagugauuuuguug	aacaauauccuggugcugagugaguugcagacagagacuccagcaucagugauuuuguug	aacaauauccuggugcugagugaguugcagacagagacuccagcaucagugauuuuguu	aacaauauccuggugcugagugaguugcagacagagacuccagcaucagugauuuuguu	uccagcaucagugauuuuguug	uccagcaucagugauuuuguug	uccagcaucagugauuuuguug	uccagcaucagugauuuuguug	uccagcaucagugauuuuguug	uccagcaucagugauuuuguug	uccagcaucagugauuuuguug	uccagcaucagugauuuuguu	uccagcaucagugauuuuguu	587	457	623	597	889	720	513	532	429	71.2567	57.8703	63.1769	71.9119	106.396	82.1956	54.164	59.567	38.6567
217	cli-miR-338b-5p	aacaauauccuggugcugagugaguugcagacagagacuccagcaucagugauuuuguug	aacaauauccuggugcugagugaguugcagacagagacuccagcaucagugauuuuguug	aacaauauccuggugcugagugaguugcagacagagacuccagcaucagugauuuuguug	aacaauauccuggugcugagugaguugcagacagagacuccagcaucagugauuuuguug	aacaauauccuggugcugagugaguugcagacagagacuccagcaucagugauuuuguug	aacaauauccuggugcugagugaguugcagacagagacuccagcaucagugauuuuguug	aacaauauccuggugcugagugaguugcagacagagacuccagcaucagugauuuuguug	aacaauauccuggugcugagugaguugcagacagagacuccagcaucagugauuuuguu	aacaauauccuggugcugagugaguugcagacagagacuccagcaucagugauuuuguu	aacaauauccuggugcugagu	aacaauauccuggugcugagu	aacaauauccuggugcugagu	aacaauauccuggugcugagu	aacaauauccuggugcugagu	aacaauauccuggugcugagu	aacaauauccuggugcugagu	aacaauauccuggugcugagu	aacaauauccuggugcugagu	35	24	29	19	6	18	18	7	9	4.2487	3.03914	2.94082	2.28865	0.71808	2.05489	1.90049	0.783776	0.81098
218	cli-miR-34a-3p	uggcagugucuuagcugguuguugugagcaauagucaaggaagcaaucagcaaguauacugcccu	uggcagugucuuagcugguuguugugagcaauagucaaggaagcaaucagcaaguauacugcccua	uggcagugucuuagcugguuguugugagcaauagucaaggaagcaaucagcaaguauacugcccu	uggcagugucuuagcugguuguugugagcaauagucaaggaagcaaucagcaaguauacugcccu	uggcagugucuuagcugguuguugugagcaauagucaaggaagcaaucagcaaguauacugcccua	uggcagugucuuagcugguuguugugagcaauagucaaggaagcaaucagcaaguauacugcccua	uggcagugucuuagcugguuguugugagcaauagucaaggaagcaaucagcaaguauacugcccu	uggcagugucuuagcugguuguugugagcaauagucaaggaagcaaucagcaaguauacugcccu	uggcagugucuuagcugguuguugugagcaauagucaaggaagcaaucagcaaguauacugcccua	caaucagcaaguauacugcccu	caaucagcaaguauacugcccua	caaucagcaaguauacugcccu	caaucagcaaguauacugcccu	caaucagcaaguauacugcccua	aaucagcaaguauacugcccua	caaucagcaaguauacugcccu	caaucagcaaguauacugcccu	aaucagcaaguauacugcccua	5	0	6	6	2	11	1	4	1	0.606957	0	0.608446	0.722733	0.23936	1.25577	0.105583	0.447872	0.0901089
219	cli-miR-34a-5p	uggcagugucuuagcugguuguugugagcaauagucaaggaagcaaucagcaaguauacugcccu	uggcagugucuuagcugguuguugugagcaauagucaaggaagcaaucagcaaguauacugcccua	uggcagugucuuagcugguuguugugagcaauagucaaggaagcaaucagcaaguauacugcccu	uggcagugucuuagcugguuguugugagcaauagucaaggaagcaaucagcaaguauacugcccu	uggcagugucuuagcugguuguugugagcaauagucaaggaagcaaucagcaaguauacugcccua	uggcagugucuuagcugguuguugugagcaauagucaaggaagcaaucagcaaguauacugcccua	uggcagugucuuagcugguuguugugagcaauagucaaggaagcaaucagcaaguauacugcccu	uggcagugucuuagcugguuguugugagcaauagucaaggaagcaaucagcaaguauacugcccu	uggcagugucuuagcugguuguugugagcaauagucaaggaagcaaucagcaaguauacugcccua	uggcagugucuuagcugguugu	uggcagugucuuagcugguuguu	uggcagugucuuagcugguuguu	uggcagugucuuagcugguugu	uggcagugucuuagcugguugu	uggcagugucuuagcugguugu	uggcagugucuuagcugguuguu	uggcagugucuuagcugguugu	uggcagugucuuagcugguugu	22	20	38	75	34	133	31	24	24	2.67061	2.53262	3.85349	9.03416	4.06912	15.1833	3.27307	2.68723	2.16261
220	cli-miR-34b-5p	null	null	null	null	null	aggcaguguaguuagcugauuguaaccacugcuccgcaaucacuacacucacugccauc	null	null	null	null	null	null	null	null	aggcaguguaguuagcugauu	null	null	null	0	0	0	0	0	18	0	0	0	0	0	0	0	0	2.05489	0	0	0
221	cli-miR-34c-5p	aggcaguguaguuagcugauugccaaaaguaccaaucacuagccacacagccagg	aggcaguguaguuagcugauugccaaaaguaccaaucacuagccacacagccagg	aggcaguguaguuagcugauugccaaaaguaccaaucacuagccacacagccagg	null	aggcaguguaguuagcugauugccaaaaguaccaaucacuagccacacagccagg	aggcaguguaguuagcugauugccaaaaguaccaaucacuagccacacagccagg	aggcaguguaguuagcugauugccaaaaguaccaaucacuagccacacagccagg	aggcaguguaguuagcugauugccaaaaguaccaaucacuagccacacagccagg	aggcaguguaguuagcugauugccaaaaguaccaaucacuagccacacagccagg	aggcaguguaguuagcugauugc	aggcaguguaguuagcugauugc	aggcaguguaguuagcugauugc	null	aggcaguguaguuagcugauugc	aggcaguguaguuagcugauugc	aggcaguguaguuagcugauugc	aggcaguguaguuagcugauugc	aggcaguguaguuagcugauugc	16	4	10	0	14	139	8	4	5	1.94226	0.506524	1.01408	0	1.67552	15.8683	0.844662	0.447872	0.450545
222	cli-miR-3618-5p	cagugauucugaaagcugucuacauuaaugaaaagaacaauguagucagcuuaacugaaucaucaguguu	null	null	null	null	null	null	null	null	cagugauucugaaagcuguc	null	null	null	null	null	null	null	null	10	0	0	0	0	0	0	0	0	1.21391	0	0	0	0	0	0	0	0
223	cli-miR-363-3p	guggaucacgaugcaauuuugauuaguuuaguaggagaaaaauugcacgguauccaucugu	guggaucacgaugcaauuuugauuaguuuaguaggagaaaaauugcacgguauccaucugu	guggaucacgaugcaauuuugauuaguuuaguaggagaaaaauugcacgguauccaucugu	guggaucacgaugcaauuuugauuaguuuaguaggagaaaaauugcacgguauccaucugu	guggaucacgaugcaauuuugauuaguuuaguaggagaaaaauugcacgguauccaucugu	guggaucacgaugcaauuuugauuaguuuaguaggagaaaaauugcacgguauccaucugu	guggaucacgaugcaauuuugauuaguuuaguaggagaaaaauugcacgguauccaucugu	guggaucacgaugcaauuuugauuaguuuaguaggagaaaaauugcacgguauccaucugu	guggaucacgaugcaauuuugauuaguuuaguaggagaaaaauugcacgguauccaucugu	aauugcacgguauccaucugu	aauugcacgguauccaucugu	aauugcacgguauccaucugu	aauugcacgguauccaucugu	aauugcacgguauccaucugu	aauugcacgguauccaucugu	aauugcacgguauccaucugu	aauugcacgguauccaucugu	aauugcacgguauccaucugu	16663	13034	14818	3427	4330	3203	583	735	585	2022.74	1650.51	1502.66	412.801	518.215	365.656	61.5548	82.2965	52.7137
224	cli-miR-363-5p	guggaucacgaugcaauuuugauuaguuuaguaggagaaaaauugcacgguauccaucugu	guggaucacgaugcaauuuugauuaguuuaguaggagaaaaauugcacgguauccaucugu	guggaucacgaugcaauuuugauuaguuuaguaggagaaaaauugcacgguauccaucugu	guggaucacgaugcaauuuugauuaguuuaguaggagaaaaauugcacgguauccaucugu	guggaucacgaugcaauuuugauuaguuuaguaggagaaaaauugcacgguauccaucugu	guggaucacgaugcaauuuugauuaguuuaguaggagaaaaauugcacgguauccaucugu	guggaucacgaugcaauuuugauuaguuuaguaggagaaaaauugcacgguauccaucugu	guggaucacgaugcaauuuugauuaguuuaguaggagaaaaauugcacgguauccaucugu	guggaucacgaugcaauuuugauuaguuuaguaggagaaaaauugcacgguauccaucugu	guggaucacgaugcaauuuuga	guggaucacgaugcaauuuuga	guggaucacgaugcaauuuuga	guggaucacgaugcaauuuuga	guggaucacgaugcaauuuuga	guggaucacgaugcaauuuuga	guggaucacgaugcaauuuuga	guggaucacgaugcaauuuugau	guggaucacgaugcaauuuuga	177	187	230	27	87	35	3	1	2	21.4863	23.68	23.3237	3.2523	10.4122	3.99562	0.316748	0.111968	0.180218
225	cli-miR-365-3p	agggacuuucaggggcagcuguguuuugcuaacccagucauaaugccccuaaaaauccuuau	gagggacuuucaggggcagcuguguuuugcuaacccagucauaaugccccuaaaaauccuuau	agggacuuucaggggcagcuguguuuugcuaacccagucauaaugccccuaaaaauccuuau	agggacuuucaggggcagcuguguuuugcuaacccagucauaaugccccuaaaaauccuuau	gagggacuuucaggggcagcuguguuuugcuaacccagucauaaugccccuaaaaauccuuau	gagggacuuucaggggcagcuguguuuugcuaacccagucauaaugccccuaaaaauccuuau	agggacuuucaggggcagcuguguuuugcuaacccagucauaaugccccuaaaaauccuuau	gagggacuuucaggggcagcuguguuuugcuaacccagucauaaugccccuaaaaauccuuau	gagggacuuucaggggcagcuguguuuugcuaacccagucauaaugccccuaaaaauccuuau	uaaugccccuaaaaauccuuau	uaaugccccuaaaaauccuuau	uaaugccccuaaaaauccuuau	uaaugccccuaaaaauccuuau	uaaugccccuaaaaauccuuau	uaaugccccuaaaaauccuuau	uaaugccccuaaaaauccuuau	uaaugccccuaaaaauccuuau	uaaugccccuaaaaauccuuau	708	579	627	745	706	822	763	1036	795	85.9451	73.3193	63.5826	89.7393	84.4941	93.8399	80.5597	115.999	71.6366
226	cli-miR-365-5p	agggacuuucaggggcagcuguguuuugcuaacccagucauaaugccccuaaaaauccuuau	gagggacuuucaggggcagcuguguuuugcuaacccagucauaaugccccuaaaaauccuuau	agggacuuucaggggcagcuguguuuugcuaacccagucauaaugccccuaaaaauccuuau	agggacuuucaggggcagcuguguuuugcuaacccagucauaaugccccuaaaaauccuuau	gagggacuuucaggggcagcuguguuuugcuaacccagucauaaugccccuaaaaauccuuau	gagggacuuucaggggcagcuguguuuugcuaacccagucauaaugccccuaaaaauccuuau	agggacuuucaggggcagcuguguuuugcuaacccagucauaaugccccuaaaaauccuuau	gagggacuuucaggggcagcuguguuuugcuaacccagucauaaugccccuaaaaauccuuau	gagggacuuucaggggcagcuguguuuugcuaacccagucauaaugccccuaaaaauccuuau	agggacuuucaggggcagcugug	gagggacuuucaggggcagcugugu	agggacuuucaggggcagcugugu	agggacuuucaggggcagcugugu	gagggacuuucaggggcagcugug	gagggacuuucaggggcagcugug	agggacuuucaggggcagcugugu	gagggacuuucaggggcagcugu	gagggacuuucaggggcagcugug	15	4	9	10	15	14	16	21	17	1.82087	0.506524	0.912668	1.20455	1.7952	1.59825	1.68932	2.35133	1.53185
227	cli-miR-375-3p	gcgucgagccccacgugcaagaccugaccugaacguuuuguucguucggcucgcguu	gcgucgagccccacgugcaagaccugaccugaacguuuuguucguucggcucgcguu	cgucgagccccacgugcaagaccugaccugaacguuuuguucguucggcucgcguu	gcgucgagccccacgugcaagaccugaccugaacguuuuguucguucggcucgcguua	cgucgagccccacgugcaagaccugaccugaacguuuuguucguucggcucgcguu	cgucgagccccacgugcaagaccugaccugaacguuuuguucguucggcucgcguu	gcgucgagccccacgugcaagaccugaccugaacguuuuguucguucggcucgcguua	cgucgagccccacgugcaagaccugaccugaacguuuuguucguucggcucgcguu	gcgucgagccccacgugcaagaccugaccugaacguuuuguucguucggcucgcguua	uuuguucguucggcucgcguu	uuuguucguucggcucgcguu	uuuguucguucggcucgcguu	uuuguucguucggcucgcguua	uuuguucguucggcucgcguu	uuuguucguucggcucgcguu	uuuguucguucggcucgcguua	uuuguucguucggcucgcguu	uuuguucguucggcucgcguua	1500	830	337	44	217	366	144	297	399	182.087	105.104	34.1744	5.30004	25.9706	41.7827	15.2039	33.2545	35.9535
228	cli-miR-383-3p	cagaucagaaggugauuguggcuuugaauagcuauuaagcagccacagcacuaccuggucaga	cagaucagaaggugauuguggcuuugaauagcuauuaagcagccacagcacuaccuggucaga	cagaucagaaggugauuguggcuuugaauagcuauuaagcagccacagcacuaccuggucaga	cagaucagaaggugauuguggcuuugaauagcuauuaagcagccacagcacuaccuggucagaa	cagaucagaaggugauuguggcuuugaauagcuauuaagcagccacagcacuaccuggucagaa	cagaucagaaggugauuguggcuuugaauagcuauuaagcagccacagcacuaccuggucagaa	cagaucagaaggugauuguggcuuugaauagcuauuaagcagccacagcacuaccuggucagaa	cagaucagaaggugauuguggcuuugaauagcuauuaagcagccacagcacuaccuggucagaa	agaucagaaggugauuguggcuuugaauagcuauuaagcagccacagcacuaccuggucaga	ccacagcacuaccuggucaga	ccacagcacuaccuggucaga	ccacagcacuaccuggucaga	ccacagcacuaccuggucagaa	ccacagcacuaccuggucagaa	ccacagcacuaccuggucagaa	ccacagcacuaccuggucagaa	ccacagcacuaccuggucagaa	ccacagcacuaccuggucaga	3	3	4	0	1	0	0	0	0	0.364174	0.379893	0.40563	0	0.11968	0	0	0	0
229	cli-miR-383-5p	cagaucagaaggugauuguggcuuugaauagcuauuaagcagccacagcacuaccuggucaga	cagaucagaaggugauuguggcuuugaauagcuauuaagcagccacagcacuaccuggucaga	cagaucagaaggugauuguggcuuugaauagcuauuaagcagccacagcacuaccuggucaga	cagaucagaaggugauuguggcuuugaauagcuauuaagcagccacagcacuaccuggucagaa	cagaucagaaggugauuguggcuuugaauagcuauuaagcagccacagcacuaccuggucagaa	cagaucagaaggugauuguggcuuugaauagcuauuaagcagccacagcacuaccuggucagaa	cagaucagaaggugauuguggcuuugaauagcuauuaagcagccacagcacuaccuggucagaa	cagaucagaaggugauuguggcuuugaauagcuauuaagcagccacagcacuaccuggucagaa	agaucagaaggugauuguggcuuugaauagcuauuaagcagccacagcacuaccuggucaga	cagaucagaaggugauuguggcu	cagaucagaaggugauuguggcu	cagaucagaaggugauuguggcu	cagaucagaaggugauuguggcu	cagaucagaaggugauuguggcu	cagaucagaaggugauuguggcu	cagaucagaaggugauuguggcu	cagaucagaaggugauuguggcu	agaucagaaggugauuguggcu	525	479	648	11	22	11	5	4	3	63.7305	60.6562	65.7121	1.32501	2.63296	1.25577	0.527914	0.447872	0.270327
230	cli-miR-429-3p	ugucuuaccaggcaaaguuagaucuagcuauuuuugucuaauacugucugguaaugccgu	ugucuuaccaggcaaaguuagaucuagcuauuuuugucuaauacugucugguaaugccgu	ugucuuaccaggcaaaguuagaucuagcuauuuuugucuaauacugucugguaaugccgu	null	ugucuuaccaggcaaaguuagaucuagcuauuuuugucuaauacugucugguaaugccgu	ugucuuaccaggcaaaguuagaucuagcuauuuuugucuaauacugucugguaaugccgu	null	null	ugucuuaccaggcaaaguuagaucuagcuauuuuugucuaauacugucugguaaugccgu	uaauacugucugguaaugccgu	uaauacugucugguaaugccgu	uaauacugucugguaaugccgu	null	uaauacugucugguaaugccgu	uaauacugucugguaaugccgu	null	null	uaauacugucugguaaugccgu	11	4	99	0	3	14	0	0	4	1.3353	0.506524	10.0394	0	0.35904	1.59825	0	0	0.360436
231	cli-miR-449c-5p	uggcagugcauguuagcuggcuguugugucugaugugucaacagcugcuagcugugcuccaca	uggcagugcauguuagcuggcuguugugucugaugugucaacagcugcuagcugugcuccaca	uggcagugcauguuagcuggcuguugugucugaugugucaacagcugcuagcugugcuccaca	uggcagugcauguuagcuggcuguugugucugaugugucaacagcugcuagcugugcuccaca	null	null	null	null	null	uggcagugcauguuagcuggcuguu	uggcagugcauguuagcuggcuguu	uggcagugcauguuagcuggcuguu	uggcagugcauguuagcuggcuguu	null	null	null	null	null	6	2	3	2	0	0	0	0	0	0.728348	0.253262	0.304223	0.240911	0	0	0	0	0
232	cli-miR-449d-5p	aggcaguguauuguuaguuagcuguucuucauacaccagcaacugacuacacugccaca	aggcaguguauuguuaguuagcuguucuucauacaccagcaacugacuacacugccaca	aggcaguguauuguuaguuagcuguucuucauacaccagcaacugacuacacugccaca	null	null	null	null	null	null	aggcaguguauuguuaguuagcug	aggcaguguauuguuaguuagcug	aggcaguguauuguuaguuagcug	null	null	null	null	null	null	11	7	11	0	0	0	0	0	0	1.3353	0.886416	1.11548	0	0	0	0	0	0
233	cli-miR-454-3p	acccuaucaauauugccucugcuuuugugaucaggguaguagugcaauauugcuuauagggucu	acccuaucaauauugccucugcuuuugugaucaggguaguagugcaauauugcuuauagggucu	acccuaucaauauugccucugcuuuugugaucaggguaguagugcaauauugcuuauagggucu	acccuaucaauauugccucugcuuuugugaucaggguaguagugcaauauugcuuauagggucu	acccuaucaauauugccucugcuuuugugaucaggguaguagugcaauauugcuuauagggucu	acccuaucaauauugccucugcuuuugugaucaggguaguagugcaauauugcuuauagggucu	acccuaucaauauugccucugcuuuugugaucaggguaguagugcaauauugcuuauagggucu	acccuaucaauauugccucugcuuuugugaucaggguaguagugcaauauugcuuauagggucu	acccuaucaauauugccucugcuuuugugaucaggguaguagugcaauauugcuuauagggucu	uagugcaauauugcuuauagggucu	uagugcaauauugcuuauagggucu	uagugcaauauugcuuauagggucu	uagugcaauauugcuuauagggucu	uagugcaauauugcuuauagggucu	uagugcaauauugcuuauagggucu	uagugcaauauugcuuauagggucu	uagugcaauauugcuuauagggucu	uagugcaauauugcuuauagggucu	46612	23587	41503	1180	4707	2177	460	466	592	5658.29	2986.84	4208.72	142.137	563.334	248.527	48.5681	52.1771	53.3445
234	cli-miR-454-5p	acccuaucaauauugccucugcuuuugugaucaggguaguagugcaauauugcuuauagggucu	acccuaucaauauugccucugcuuuugugaucaggguaguagugcaauauugcuuauagggucu	acccuaucaauauugccucugcuuuugugaucaggguaguagugcaauauugcuuauagggucu	acccuaucaauauugccucugcuuuugugaucaggguaguagugcaauauugcuuauagggucu	acccuaucaauauugccucugcuuuugugaucaggguaguagugcaauauugcuuauagggucu	acccuaucaauauugccucugcuuuugugaucaggguaguagugcaauauugcuuauagggucu	acccuaucaauauugccucugcuuuugugaucaggguaguagugcaauauugcuuauagggucu	acccuaucaauauugccucugcuuuugugaucaggguaguagugcaauauugcuuauagggucu	acccuaucaauauugccucugcuuuugugaucaggguaguagugcaauauugcuuauagggucu	acccuaucaauauugccucugcu	acccuaucaauauugccucugcu	acccuaucaauauugccucugcu	acccuaucaauauugccucugcu	acccuaucaauauugccucugcu	acccuaucaauauugccucugcu	acccuaucaauauugccucugcu	acccuaucaauauugccucugcu	acccuaucaauauugccucugc	81	54	52	8	20	3	2	4	2	9.8327	6.83807	5.2732	0.963643	2.3936	0.342482	0.211166	0.447872	0.180218
235	cli-miR-455-3p	uaugugcccuuggacuacaucguggaagccagcaccaugcaguccaugggcauauacacu	uaugugcccuuggacuacaucguggaagccagcaccaugcaguccaugggcauauacacu	uaugugcccuuggacuacaucguggaagccagcaccaugcaguccaugggcauauacacu	uaugugcccuuggacuacaucguggaagccagcaccaugcaguccaugggcauauacacu	uaugugcccuuggacuacaucguggaagccagcaccaugcaguccaugggcauauacac	uaugugcccuuggacuacaucguggaagccagcaccaugcaguccaugggcauauacacu	uaugugcccuuggacuacaucguggaagccagcaccaugcaguccaugggcauauacacu	uaugugcccuuggacuacaucguggaagccagcaccaugcaguccaugggcauauacacu	uaugugcccuuggacuacaucguggaagccagcaccaugcaguccaugggcauauacacu	gcaguccaugggcauauacacu	gcaguccaugggcauauacacu	gcaguccaugggcauauacacu	gcaguccaugggcauauacacu	ugcaguccaugggcauauacac	gcaguccaugggcauauacacu	gcaguccaugggcauauacacu	gcaguccaugggcauauacacu	gcaguccaugggcauauacacu	607	673	671	37	39	89	13	10	15	73.6845	85.2226	68.0445	4.45685	4.66752	10.1603	1.37258	1.11968	1.35163
236	cli-miR-455-5p	uaugugcccuuggacuacaucguggaagccagcaccaugcaguccaugggcauauacacu	uaugugcccuuggacuacaucguggaagccagcaccaugcaguccaugggcauauacacu	uaugugcccuuggacuacaucguggaagccagcaccaugcaguccaugggcauauacacu	uaugugcccuuggacuacaucguggaagccagcaccaugcaguccaugggcauauacacu	uaugugcccuuggacuacaucguggaagccagcaccaugcaguccaugggcauauacac	uaugugcccuuggacuacaucguggaagccagcaccaugcaguccaugggcauauacacu	uaugugcccuuggacuacaucguggaagccagcaccaugcaguccaugggcauauacacu	uaugugcccuuggacuacaucguggaagccagcaccaugcaguccaugggcauauacacu	uaugugcccuuggacuacaucguggaagccagcaccaugcaguccaugggcauauacacu	uaugugcccuuggacuacaucg	uaugugcccuuggacuacaucg	uaugugcccuuggacuacaucg	uaugugcccuuggacuacaucg	uaugugcccuuggacuacaucg	uaugugcccuuggacuacaucg	uaugugcccuuggacuacaucg	uaugugcccuuggacuacaucg	uaugugcccuuggacuacaucg	4412	3520	3818	128	256	264	73	36	28	535.579	445.741	387.174	15.4183	30.6381	30.1384	7.70754	4.03085	2.52305
237	cli-miR-456-3p	caggcugguuagaugguugucaugcauucaucugauaucugcu	agcaggcaucuucucagccuacacguggauuccuaaaucugcaggcugguuagaugguuguca	agcaggcaucuucucagccuacacguggauuccuaaaucugcaggcugguuagaugguuguca	caggcugguuagaugguugucaugcauucaucugauaucugcu	agcaggcaucuucucagccuacacguggauuccuaaaucugcaggcugguuagaugguuguca	agcaggcaucuucucagccuacacguggauuccuaaaucugcaggcugguuagaugguuguca	agcaggcaucuucucagccuacacguggauuccuaaaucugcaggcugguuagaugguuguca	agcaggcaucuucucagccuacacguggauuccuaaaucugcaggcugguuagaugguuguca	caggcugguuagaugguugucaugcauucaucugauaucugcu	gcauucaucugauaucugcu	caggcugguuagaugguuguca	caggcugguuagaugguuguca	gcauucaucugauaucugcu	caggcugguuagaugguuguca	caggcugguuagaugguuguca	caggcugguuagaugguuguca	caggcugguuagaugguuguca	gcauucaucugauaucugcu	0	1250	1547	0	573	223	169	141	0	0	158.289	156.878	0	68.5767	25.4578	17.8435	15.7875	0
238	cli-miR-456-5p	caggcugguuagaugguugucaugcauucaucugauaucugcu	agcaggcaucuucucagccuacacguggauuccuaaaucugcaggcugguuagaugguuguca	agcaggcaucuucucagccuacacguggauuccuaaaucugcaggcugguuagaugguuguca	caggcugguuagaugguugucaugcauucaucugauaucugcu	agcaggcaucuucucagccuacacguggauuccuaaaucugcaggcugguuagaugguuguca	agcaggcaucuucucagccuacacguggauuccuaaaucugcaggcugguuagaugguuguca	agcaggcaucuucucagccuacacguggauuccuaaaucugcaggcugguuagaugguuguca	agcaggcaucuucucagccuacacguggauuccuaaaucugcaggcugguuagaugguuguca	caggcugguuagaugguugucaugcauucaucugauaucugcu	caggcugguuagaugguuguca	agcaggcaucuucucagccuacacgug	agcaggcaucuucucagccuacacgug	caggcugguuagaugguuguca	agcaggcaucuucucagccuacacgug	agcaggcaucuucucagccuacacgug	agcaggcaucuucucagccuacacgug	agcaggcaucuucucagccuacacgug	caggcugguuagaugguuguca	3130	0	0	165	0	0	0	0	152	379.955	0	0	19.8751	0	0	0	0	13.6966
239	cli-miR-458-3p	gcgccauuuccagagcuauaaacagucucauugucauagcucuuugaaugguacugc	agcgccauuuccagagcuauaaacagucucauugucauagcucuuugaaugguacugc	agcgccauuuccagagcuauaaacagucucauugucauagcucuuugaaugguacugc	agcgccauuuccagagcuauaaacagucucauugucauagcucuuugaaugguacugc	agcgccauuuccagagcuauaaacagucucauugucauagcucuuugaaugguacugc	agcgccauuuccagagcuauaaacagucucauugucauagcucuuugaaugguacugc	agcgccauuuccagagcuauaaacagucucauugucauagcucuuugaaugguacugc	agcgccauuuccagagcuauaaacagucucauugucauagcucuuugaaugguacugc	agcgccauuuccagagcuauaaacagucucauugucauagcucuuugaaugguacugc	auagcucuuugaaugguacugc	auagcucuuugaaugguacugc	auagcucuuugaaugguacugc	auagcucuuugaaugguacugc	auagcucuuugaaugguacugc	auagcucuuugaaugguacugc	auagcucuuugaaugguacugc	auagcucuuugaaugguacugc	auagcucuuugaaugguacugc	1370	768	742	388	1076	441	74	17	96	166.306	97.2525	75.2444	46.7367	128.776	50.3448	7.81313	1.90346	8.65046
240	cli-miR-460a-3p	ccugcauuguacacacuguguguauugacuggaaaugcacagcgcauacaauguggauu	ccugcauuguacacacuguguguauugacuggaaaugcacagcgcauacaauguggauu	ccugcauuguacacacuguguguauugacuggaaaugcacagcgcauacaauguggauu	ccugcauuguacacacuguguguauugacuggaaaugcacagcgcauacaauguggauu	ccugcauuguacacacuguguguauugacuggaaaugcacagcgcauacaauguggauu	ccugcauuguacacacuguguguauugacuggaaaugcacagcgcauacaauguggauu	ccugcauuguacacacuguguguauugacuggaaaugcacagcgcauacaauguggauu	ccugcauuguacacacuguguguauugacuggaaaugcacagcgcauacaauguggauu	ccugcauuguacacacuguguguauugacuggaaaugcacagcgcauacaauguggau	cacagcgcauacaauguggauu	cacagcgcauacaauguggauu	cacagcgcauacaauguggauu	cacagcgcauacaauguggauu	cacagcgcauacaauguggauu	cacagcgcauacaauguggauu	cacagcgcauacaauguggauu	cacagcgcauacaauguggauu	gcacagcgcauacaauguggau	146	85	99	19	18	16	9	2	4	17.7231	10.7636	10.0394	2.28865	2.15424	1.82657	0.950245	0.223936	0.360436
241	cli-miR-460a-5p	ccugcauuguacacacuguguguauugacuggaaaugcacagcgcauacaauguggauu	ccugcauuguacacacuguguguauugacuggaaaugcacagcgcauacaauguggauu	ccugcauuguacacacuguguguauugacuggaaaugcacagcgcauacaauguggauu	ccugcauuguacacacuguguguauugacuggaaaugcacagcgcauacaauguggauu	ccugcauuguacacacuguguguauugacuggaaaugcacagcgcauacaauguggauu	ccugcauuguacacacuguguguauugacuggaaaugcacagcgcauacaauguggauu	ccugcauuguacacacuguguguauugacuggaaaugcacagcgcauacaauguggauu	ccugcauuguacacacuguguguauugacuggaaaugcacagcgcauacaauguggauu	ccugcauuguacacacuguguguauugacuggaaaugcacagcgcauacaauguggau	ccugcauuguacacacugugugu	ccugcauuguacacacugugugu	ccugcauuguacacacugugugu	ccugcauuguacacacugugugu	ccugcauuguacacacugugugu	ccugcauuguacacacugugugu	ccugcauuguacacacugugugu	ccugcauuguacacacugugugu	ccugcauuguacacacugugugu	5602	3412	3382	306	935	504	142	221	90	680.034	432.065	342.961	36.8594	111.901	57.5369	14.9928	24.7449	8.1098
242	cli-miR-460b-3p	uccucauuguacaugcuguguguauuugucacguacacagcgcaugcaauguggaca	uccucauuguacaugcuguguguauuugucacguacacagcgcaugcaauguggaca	uccucauuguacaugcuguguguauuugucacguacacagcgcaugcaauguggaca	uccucauuguacaugcuguguguauuugucacguacacagcgcaugcaauguggac	uccucauuguacaugcuguguguauuugucacguacacagcgcaugcaauguggaca	uccucauuguacaugcuguguguauuugucacguacacagcgcaugcaauguggaca	uccucauuguacaugcuguguguauuugucacguacacagcgcaugcaauguggac	uccucauuguacaugcuguguguauuugucacguacacagcgcaugcaauguggaca	uccucauuguacaugcuguguguauuugucacguacacagcgcaugcaauguggaca	acagcgcaugcaauguggaca	acagcgcaugcaauguggaca	acagcgcaugcaauguggaca	cacagcgcaugcaauguggac	acagcgcaugcaauguggaca	acagcgcaugcaauguggaca	acagcgcaugcaauguggac	acagcgcaugcaauguggaca	acagcgcaugcaauguggaca	46	47	52	15	8	36	23	17	14	5.584	5.95165	5.2732	1.80683	0.957441	4.10978	2.4284	1.90346	1.26152
243	cli-miR-460b-5p	uccucauuguacaugcuguguguauuugucacguacacagcgcaugcaauguggaca	uccucauuguacaugcuguguguauuugucacguacacagcgcaugcaauguggaca	uccucauuguacaugcuguguguauuugucacguacacagcgcaugcaauguggaca	uccucauuguacaugcuguguguauuugucacguacacagcgcaugcaauguggac	uccucauuguacaugcuguguguauuugucacguacacagcgcaugcaauguggaca	uccucauuguacaugcuguguguauuugucacguacacagcgcaugcaauguggaca	uccucauuguacaugcuguguguauuugucacguacacagcgcaugcaauguggac	uccucauuguacaugcuguguguauuugucacguacacagcgcaugcaauguggaca	uccucauuguacaugcuguguguauuugucacguacacagcgcaugcaauguggaca	uccucauuguacaugcugugugu	uccucauuguacaugcugugugu	uccucauuguacaugcugugugu	uccucauuguacaugcugugugu	uccucauuguacaugcugugugu	uccucauuguacaugcugugugu	uccucauuguacaugcugugugu	uccucauuguacaugcugugugu	uccucauuguacaugcugugugu	266	193	229	53	114	145	172	81	116	32.2901	24.4398	23.2223	6.38414	13.6435	16.5533	18.1602	9.06941	10.4526
244	cli-miR-489-3p	uggucguauguaugacgucauuuacuuggacuuuuaggagugacaucauauguacggcugcu	uggucguauguaugacgucauuuacuuggacuuuuaggagugacaucauauguacggcugcu	uggucguauguaugacgucauuuacuuggacuuuuaggagugacaucauauguacggcugcu	uggucguauguaugacgucauuuacuuggacuuuuaggagugacaucauauguacggcugcu	uggucguauguaugacgucauuuacuuggacuuuuaggagugacaucauauguacggcugcu	uggucguauguaugacgucauuuacuuggacuuuuaggagugacaucauauguacggcugcu	uggucguauguaugacgucauuuacuuggacuuuuaggagugacaucauauguacggcugcu	uggucguauguaugacgucauuuacuuggacuuuuaggagugacaucauauguacggcugcu	uggucguauguaugacgucauuuacuuggacuuuuaggagugacaucauauguacggcugcu	ugacaucauauguacggcugcu	ugacaucauauguacggcugcu	ugacaucauauguacggcugcu	ugacaucauauguacggcugcu	ugacaucauauguacggcugcu	ugacaucauauguacggcugcu	ugacaucauauguacggcugcu	ugacaucauauguacggcugcu	ugacaucauauguacggcugcu	227	234	238	203	262	162	31	42	38	27.5558	29.6316	24.135	24.4525	31.3562	18.494	3.27307	4.70265	3.42414
245	cli-miR-489-5p	uggucguauguaugacgucauuuacuuggacuuuuaggagugacaucauauguacggcugcu	uggucguauguaugacgucauuuacuuggacuuuuaggagugacaucauauguacggcugcu	uggucguauguaugacgucauuuacuuggacuuuuaggagugacaucauauguacggcugcu	uggucguauguaugacgucauuuacuuggacuuuuaggagugacaucauauguacggcugcu	uggucguauguaugacgucauuuacuuggacuuuuaggagugacaucauauguacggcugcu	uggucguauguaugacgucauuuacuuggacuuuuaggagugacaucauauguacggcugcu	uggucguauguaugacgucauuuacuuggacuuuuaggagugacaucauauguacggcugcu	uggucguauguaugacgucauuuacuuggacuuuuaggagugacaucauauguacggcugcu	uggucguauguaugacgucauuuacuuggacuuuuaggagugacaucauauguacggcugcu	uggucguauguaugacgucauu	uggucguauguaugacgucauu	uggucguauguaugacgucauu	uggucguauguaugacgucauu	uggucguauguaugacgucauu	uggucguauguaugacgucauu	uggucguauguaugacgucauu	uggucguauguaugacgucauu	uggucguauguaugacgucauu	6	7	9	19	11	11	2	3	1	0.728348	0.886416	0.912668	2.28865	1.31648	1.25577	0.211166	0.335904	0.0901089
246	cli-miR-490-3p	ccauggaucuccaggugggucaagauuauagagauacaccaaccuggaggacuccaugcugu	ccauggaucuccaggugggucaagauuauagagauacaccaaccuggaggacuccaugcugu	ccauggaucuccaggugggucaagauuauagagauacaccaaccuggaggacuccaugcugu	accauggaucuccaggugggucaagauuauagagauacaccaaccuggaggacuccaugcugu	ccauggaucuccaggugggucaagauuauagagauacaccaaccuggaggacuccaugcug	accauggaucuccaggugggucaagauuauagagauacaccaaccuggaggacuccaugcugu	null	null	accauggaucuccaggugggucaagauuauagagauacaccaaccuggaggacuccaugcugu	caaccuggaggacuccaugcugu	caaccuggaggacuccaugcugu	caaccuggaggacuccaugcugu	caaccuggaggacuccaugcugu	caaccuggaggacuccaugcug	caaccuggaggacuccaugcugu	null	null	caaccuggaggacuccaugcugu	142	152	296	14	2	3	0	0	4	17.2376	19.2479	30.0167	1.68638	0.23936	0.342482	0	0	0.360436
247	cli-miR-490-5p	ccauggaucuccaggugggucaagauuauagagauacaccaaccuggaggacuccaugcugu	ccauggaucuccaggugggucaagauuauagagauacaccaaccuggaggacuccaugcugu	ccauggaucuccaggugggucaagauuauagagauacaccaaccuggaggacuccaugcugu	accauggaucuccaggugggucaagauuauagagauacaccaaccuggaggacuccaugcugu	ccauggaucuccaggugggucaagauuauagagauacaccaaccuggaggacuccaugcug	accauggaucuccaggugggucaagauuauagagauacaccaaccuggaggacuccaugcugu	null	null	accauggaucuccaggugggucaagauuauagagauacaccaaccuggaggacuccaugcugu	ccauggaucuccaggugggu	ccauggaucuccaggugggu	ccauggaucuccaggugggu	accauggaucuccaggugggu	ccauggaucuccaggugggu	accauggaucuccaggugggu	null	null	accauggaucuccaggugggu	18	12	25	0	1	0	0	0	0	2.18504	1.51957	2.53519	0	0.11968	0	0	0	0
248	cli-miR-499-3p	uuaagacuuguagugauguuuagauaauguauuacaugaacaucacuuuaagucugugcu	uuaagacuuguagugauguuuagauaauguauuacaugaacaucacuuuaagucugugcu	uuaagacuuguagugauguuuagauaauguauuacaugaacaucacuuuaagucugugcu	uuaagacuuguagugauguuuagauaauguauuacaugaacaucacuuuaagucugugcu	uuaagacuuguagugauguuuagauaauguauuacaugaacaucacuuuaagucugugcu	uuaagacuuguagugauguuuagauaauguauuacaugaacaucacuuuaagucugugc	uuaagacuuguagugauguuuagauaauguauuacaugaacaucacuuuaagucugugcu	uuaagacuuguagugauguuuagauaauguauuacaugaacaucacuuuaagucugugcu	uuaagacuuguagugauguuuagauaauguauuacaugaacaucacuuuaagucugugcu	aacaucacuuuaagucugugcu	aacaucacuuuaagucugugcu	aacaucacuuuaagucugugcu	aacaucacuuuaagucugugcu	aacaucacuuuaagucugugcu	aacaucacuuuaagucugugc	aacaucacuuuaagucugugcu	aacaucacuuuaagucugugcu	aacaucacuuuaagucugugcu	257	166	153	76	22	44	12	41	56	31.1976	21.0207	15.5154	9.15461	2.63296	5.02306	1.26699	4.59069	5.0461
249	cli-miR-499-5p	uuaagacuuguagugauguuuagauaauguauuacaugaacaucacuuuaagucugugcu	uuaagacuuguagugauguuuagauaauguauuacaugaacaucacuuuaagucugugcu	uuaagacuuguagugauguuuagauaauguauuacaugaacaucacuuuaagucugugcu	uuaagacuuguagugauguuuagauaauguauuacaugaacaucacuuuaagucugugcu	uuaagacuuguagugauguuuagauaauguauuacaugaacaucacuuuaagucugugcu	uuaagacuuguagugauguuuagauaauguauuacaugaacaucacuuuaagucugugc	uuaagacuuguagugauguuuagauaauguauuacaugaacaucacuuuaagucugugcu	uuaagacuuguagugauguuuagauaauguauuacaugaacaucacuuuaagucugugcu	uuaagacuuguagugauguuuagauaauguauuacaugaacaucacuuuaagucugugcu	uuaagacuuguagugauguuu	uuaagacuuguagugauguuu	uuaagacuuguagugauguuu	uuaagacuuguagugauguuu	uuaagacuuguagugauguuu	uuaagacuuguagugauguuu	uuaagacuuguagugauguuu	uuaagacuuguagugauguuu	uuaagacuuguagugauguuu	5251	4111	3106	733	390	525	191	603	592	637.426	520.58	314.972	88.2938	46.6752	59.9343	20.1663	67.5167	53.3445
250	cli-miR-551a-3p	gaaaucaaguguagguggagccuguggcagcgaucaaggcgacccacacuugguuuca	gaaaucaaguguagguggagccuguggcagcgaucaaggcgacccacacuugguuuca	gaaaucaaguguagguggagccuguggcagcgaucaaggcgacccacacuugguuucaa	gaaaucaaguguagguggagccuguggcagcgaucaaggcgacccacacuugguuuca	gaaaucaaguguagguggagccuguggcagcgaucaaggcgacccacacuugguuucaag	gaaaucaaguguagguggagccuguggcagcgaucaaggcgacccacacuugguuuca	gaaaucaaguguagguggagccuguggcagcgaucaaggcgacccacacuugguuuca	gaaaucaaguguagguggagccuguggcagcgaucaaggcgacccacacuugguuuca	gaaaucaaguguagguggagccuguggcagcgaucaaggcgacccacacuugguuuca	gcgacccacacuugguuuca	gcgacccacacuugguuuca	gcgacccacacuugguuucaa	gcgacccacacuugguuuca	gcgacccacacuugguuucaag	gcgacccacacuugguuuca	gcgacccacacuugguuuca	gcgacccacacuugguuuca	gcgacccacacuugguuuca	33	41	15	83	66	263	21	40	16	4.00591	5.19187	1.52111	9.9978	7.89888	30.0242	2.21724	4.47872	1.44174
251	cli-miR-551a-5p	gaaaucaaguguagguggagccuguggcagcgaucaaggcgacccacacuugguuuca	gaaaucaaguguagguggagccuguggcagcgaucaaggcgacccacacuugguuuca	gaaaucaaguguagguggagccuguggcagcgaucaaggcgacccacacuugguuucaa	gaaaucaaguguagguggagccuguggcagcgaucaaggcgacccacacuugguuuca	gaaaucaaguguagguggagccuguggcagcgaucaaggcgacccacacuugguuucaag	gaaaucaaguguagguggagccuguggcagcgaucaaggcgacccacacuugguuuca	gaaaucaaguguagguggagccuguggcagcgaucaaggcgacccacacuugguuuca	gaaaucaaguguagguggagccuguggcagcgaucaaggcgacccacacuugguuuca	gaaaucaaguguagguggagccuguggcagcgaucaaggcgacccacacuugguuuca	gaaaucaaguguagguggagcc	gaaaucaaguguagguggagcc	gaaaucaaguguagguggagcc	gaaaucaaguguagguggagccu	gaaaucaaguguagguggagccu	gaaaucaaguguagguggagccu	gaaaucaaguguagguggagcc	gaaaucaaguguagguggagc	gaaaucaaguguagguggagcc	4	7	3	15	21	35	3	3	2	0.485565	0.886416	0.304223	1.80683	2.51328	3.99562	0.316748	0.335904	0.180218
252	cli-miR-551b-3p	agaaaucaaggguggguaagaccucgucagcaaaguuuaaggcgacccauacuugguuucagg	agaaaucaaggguggguaagaccucgucagcaaaguuuaaggcgacccauacuugguuucagg	agaaaucaaggguggguaagaccucgucagcaaaguuuaaggcgacccauacuugguuucagg	agaaaucaaggguggguaagaccucgucagcaaaguuuaaggcgacccauacuugguuucagg	agaaaucaaggguggguaagaccucgucagcaaaguuuaaggcgacccauacuugguuucagg	agaaaucaaggguggguaagaccucgucagcaaaguuuaaggcgacccauacuugguuucagg	agaaaucaaggguggguaagaccucgucagcaaaguuuaaggcgacccauacuugguuucagg	agaaaucaaggguggguaagaccucgucagcaaaguuuaaggcgacccauacuugguuucagg	agaaaucaaggguggguaagaccucgucagcaaaguuuaaggcgacccauacuugguuucagg	gcgacccauacuugguuucagg	gcgacccauacuugguuucagg	gcgacccauacuugguuucagg	gcgacccauacuugguuucagg	gcgacccauacuugguuucagg	gcgacccauacuugguuucagg	gcgacccauacuugguuucagg	gcgacccauacuugguuucagg	gcgacccauacuugguuucagg	146	110	115	46	86	53	28	46	21	17.7231	13.9294	11.6619	5.54095	10.2925	6.05051	2.95632	5.15053	1.89229
253	cli-miR-551b-5p	agaaaucaaggguggguaagaccucgucagcaaaguuuaaggcgacccauacuugguuucagg	agaaaucaaggguggguaagaccucgucagcaaaguuuaaggcgacccauacuugguuucagg	agaaaucaaggguggguaagaccucgucagcaaaguuuaaggcgacccauacuugguuucagg	agaaaucaaggguggguaagaccucgucagcaaaguuuaaggcgacccauacuugguuucagg	agaaaucaaggguggguaagaccucgucagcaaaguuuaaggcgacccauacuugguuucagg	agaaaucaaggguggguaagaccucgucagcaaaguuuaaggcgacccauacuugguuucagg	agaaaucaaggguggguaagaccucgucagcaaaguuuaaggcgacccauacuugguuucagg	agaaaucaaggguggguaagaccucgucagcaaaguuuaaggcgacccauacuugguuucagg	agaaaucaaggguggguaagaccucgucagcaaaguuuaaggcgacccauacuugguuucagg	agaaaucaaggguggguaagacc	agaaaucaaggguggguaagacc	agaaaucaaggguggguaagaccu	agaaaucaaggguggguaagacc	agaaaucaaggguggguaagacc	agaaaucaaggguggguaagaccu	agaaaucaaggguggguaagacc	agaaaucaaggguggguaagacc	agaaaucaaggguggguaagaccu	22	15	11	1	15	3	2	3	1	2.67061	1.89946	1.11548	0.120455	1.7952	0.342482	0.211166	0.335904	0.0901089
254	cli-miR-599-3p	uuugauaagcugacaugggacaggauuucuuuucacuguugugucaguauaucaaacuca	uuugauaagcugacaugggacaggauuucuuuucacuguugugucaguauaucaaacuca	uguuugauaagcugacaugggacaggauuucuuuucacuguugugucaguauaucaaacuca	uguuugauaagcugacaugggacaggauuucuuuucacuguugugucaguauaucaaacuca	guuugauaagcugacaugggacaggauuucuuuucacuguugugucaguauaucaaacuca	guuugauaagcugacaugggacaggauuucuuuucacuguugugucaguauaucaaacuca	null	null	null	uugugucaguauaucaaacuca	guugugucaguauaucaaacuca	uugugucaguauaucaaacuca	uugugucaguauaucaaacuca	uugugucaguauaucaaacuca	uugugucaguauaucaaacuca	null	null	null	20	15	18	8	23	15	0	0	0	2.42783	1.89946	1.82534	0.963643	2.75264	1.71241	0	0	0
255	cli-miR-599-5p	uuugauaagcugacaugggacaggauuucuuuucacuguugugucaguauaucaaacuca	uuugauaagcugacaugggacaggauuucuuuucacuguugugucaguauaucaaacuca	uguuugauaagcugacaugggacaggauuucuuuucacuguugugucaguauaucaaacuca	uguuugauaagcugacaugggacaggauuucuuuucacuguugugucaguauaucaaacuca	guuugauaagcugacaugggacaggauuucuuuucacuguugugucaguauaucaaacuca	guuugauaagcugacaugggacaggauuucuuuucacuguugugucaguauaucaaacuca	null	null	null	uuugauaagcugacaugggac	uuugauaagcugacaugggacag	uguuugauaagcugacaugggac	uguuugauaagcugacaugggaca	guuugauaagcugacaugggacag	guuugauaagcugacaugggacagg	null	null	null	5	2	8	0	4	2	0	0	0	0.606957	0.253262	0.811261	0	0.47872	0.228321	0	0	0
256	cli-miR-7a-3p	uggaagacuagugauuuuguuguuuuuagauaacuaaauugacaacaaaucgcagucugccaua	uggaagacuagugauuuuguuguuuuuagauaacuaaauugacaacaaaucgcagucugccaua	uggaagacuagugauuuuguuguuuuuagauaacuaaauugacaacaaaucgcagucugccaua	uggaagacuagugauuuuguuguuuuuagauaacuaaauugacaacaaaucgcagucugccaua	gaagacuagugauuuuguuguuuuuagauaacuaaauugacaacaaaucgcagucugccaua	uggaagacuagugauuuuguuguuuuuagauaacuaaauugacaacaaaucgcagucugccaua	gaagacuagugauuuuguuguuuuuagauaacuaaauugacaacaaaucgcagucugccaua	gaagacuagugauuuuguuguuuuuagauaacuaaauugacaacaaaucgcagucugccaua	gaagacuagugauuuuguuguuuuuagauaacuaaauugacaacaaaucgcagucugccaua	caacaaaucgcagucugccaua	caacaaaucgcagucugccaua	caacaaaucgcagucugccaua	caacaaaucgcagucugccaua	caacaaaucgcagucugccaua	caacaaaucgcagucugccaua	caacaaaucgcagucugccaua	caacaaaucgcagucugccaua	caacaaaucgcagucugccaua	390	197	251	202	366	294	357	468	257	47.3426	24.9463	25.4533	24.332	43.8029	33.5632	37.6931	52.401	23.158
257	cli-miR-7a-5p	uggaagacuagugauuuuguuguuuuuagauaacuaaauugacaacaaaucgcagucugccaua	uggaagacuagugauuuuguuguuuuuagauaacuaaauugacaacaaaucgcagucugccaua	uggaagacuagugauuuuguuguuuuuagauaacuaaauugacaacaaaucgcagucugccaua	uggaagacuagugauuuuguuguuuuuagauaacuaaauugacaacaaaucgcagucugccaua	gaagacuagugauuuuguuguuuuuagauaacuaaauugacaacaaaucgcagucugccaua	uggaagacuagugauuuuguuguuuuuagauaacuaaauugacaacaaaucgcagucugccaua	gaagacuagugauuuuguuguuuuuagauaacuaaauugacaacaaaucgcagucugccaua	gaagacuagugauuuuguuguuuuuagauaacuaaauugacaacaaaucgcagucugccaua	gaagacuagugauuuuguuguuuuuagauaacuaaauugacaacaaaucgcagucugccaua	uggaagacuagugauuuuguuguu	uggaagacuagugauuuuguuguu	uggaagacuagugauuuuguuguu	uggaagacuagugauuuuguuguu	gaagacuagugauuuuguuguu	uggaagacuagugauuuuguuguu	gaagacuagugauuuuguuguu	gaagacuagugauuuuguuguu	gaagacuagugauuuuguuguu	26	27	32	5	14	21	11	8	9	3.15617	3.41903	3.24504	0.602277	1.67552	2.39737	1.16141	0.895744	0.81098
258	cli-miR-875-3p	aauaccucagucuuuucggauguucuauaaauucaccuggaaauacugagguugcgu	aauaccucagucuuuucggauguucuauaaauucaccuggaaauacugagguugcgu	aauaccucagucuuuucggauguucuauaaauucaccuggaaauacugagguugcgu	aauaccucagucuuuucggauguucuauaaauucaccuggaaauacugagguugcgu	aauaccucagucuuuucggauguucuauaaauucaccuggaaauacugagguugcgu	aauaccucagucuuuucggauguucuauaaauucaccuggaaauacugagguugcgu	aauaccucagucuuuucggauguucuauaaauucaccuggaaauacugagguugcgu	aauaccucagucuuuucggauguucuauaaauucaccuggaaauacugagguugcgu	aauaccucagucuuuucggauguucuauaaauucaccuggaaauacugagguugcgu	ccuggaaauacugagguugcgu	ccuggaaauacugagguugcgu	ccuggaaauacugagguugcgu	ccuggaaauacugagguugcgu	ccuggaaauacugagguugcgu	ccuggaaauacugagguugcgu	ccuggaaauacugagguugcgu	ccuggaaauacugagguugcgu	ccuggaaauacugagguugcgu	5	2	5	0	2	2	0	0	0	0.606957	0.253262	0.507038	0	0.23936	0.228321	0	0	0
259	cli-miR-875-5p	aauaccucagucuuuucggauguucuauaaauucaccuggaaauacugagguugcgu	aauaccucagucuuuucggauguucuauaaauucaccuggaaauacugagguugcgu	aauaccucagucuuuucggauguucuauaaauucaccuggaaauacugagguugcgu	aauaccucagucuuuucggauguucuauaaauucaccuggaaauacugagguugcgu	aauaccucagucuuuucggauguucuauaaauucaccuggaaauacugagguugcgu	aauaccucagucuuuucggauguucuauaaauucaccuggaaauacugagguugcgu	aauaccucagucuuuucggauguucuauaaauucaccuggaaauacugagguugcgu	aauaccucagucuuuucggauguucuauaaauucaccuggaaauacugagguugcgu	aauaccucagucuuuucggauguucuauaaauucaccuggaaauacugagguugcgu	aauaccucagucuuuucggaug	aauaccucagucuuuucggaug	aauaccucagucuuuucggaug	aauaccucagucuuuucggaug	aauaccucagucuuuucggaug	aauaccucagucuuuucggaug	aauaccucagucuuuucggaug	aauaccucagucuuuucggaug	aauaccucagucuuuucggaug	413	589	431	129	312	238	33	14	6	50.1346	74.5856	43.7067	15.5388	37.3402	27.1702	3.48423	1.56755	0.540653
260	cli-miR-92-3p	agguugggaucaguugcaaugcugugugugucucugguauugcacuugucccggccugu	agguugggaucaguugcaaugcugugugugucucugguauugcacuugucccggccugu	agguugggaucaguugcaaugcugugugugucucugguauugcacuugucccggccugu	cagguugggaucaguugcaaugcugugugugucucugguauugcacuugucccggccugu	agguugggaucaguugcaaugcugugugugucucugguauugcacuugucccggccugu	agguugggaucaguugcaaugcugugugugucucugguauugcacuugucccggccugu	agguugggaucaguugcaaugcugugugugucucugguauugcacuugucccggccugu	agguugggaucaguugcaaugcugugugugucucugguauugcacuugucccggccugu	agguugggaucaguugcaaugcugugugugucucugguauugcacuugucccggccugu	uauugcacuugucccggccugu	uauugcacuugucccggccugu	uauugcacuugucccggccugu	uauugcacuugucccggccugu	uauugcacuugucccggccugu	uauugcacuugucccggccugu	uauugcacuugucccggccugu	uauugcacuugucccggccugu	uauugcacuugucccggccugu	297364	227472	277271	71858	114367	123767	55623	45004	49160	36097.4	28805	28117.4	8655.69	13687.5	14129.3	5872.83	5039.01	4429.75
261	cli-miR-92-5p	agguugggaucaguugcaaugcugugugugucucugguauugcacuugucccggccugu	agguugggaucaguugcaaugcugugugugucucugguauugcacuugucccggccugu	agguugggaucaguugcaaugcugugugugucucugguauugcacuugucccggccugu	cagguugggaucaguugcaaugcugugugugucucugguauugcacuugucccggccugu	agguugggaucaguugcaaugcugugugugucucugguauugcacuugucccggccugu	agguugggaucaguugcaaugcugugugugucucugguauugcacuugucccggccugu	agguugggaucaguugcaaugcugugugugucucugguauugcacuugucccggccugu	agguugggaucaguugcaaugcugugugugucucugguauugcacuugucccggccugu	agguugggaucaguugcaaugcugugugugucucugguauugcacuugucccggccugu	agguugggaucaguugcaaugcu	agguugggaucaguugcaaugcu	agguugggaucaguugcaaugcu	cagguugggaucaguugcaaugc	agguugggaucaguugcaaugcu	agguugggaucaguugcaaugcu	agguugggaucaguugcaaugcu	agguugggaucaguugcaaugcu	agguugggaucaguugcaaugcu	338	118	201	2	49	13	14	9	20	41.0303	14.9424	20.3829	0.240911	5.86432	1.48409	1.47816	1.00771	1.80218
262	cli-miR-9-3p	ucuuugguuaucuagcuguaugaguguaugugauaucauaaagcuagagaaccgaauguaa	ucuuugguuaucuagcuguaugaguguaugugauaucauaaagcuagagaaccgaauguaa	ucuuugguuaucuagcuguaugaguguaugugauaucauaaagcuagagaaccgaauguaa	ucuuugguuaucuagcuguaugaguguaugugauaucauaaagcuagagaaccgaauguaa	ucuuugguuaucuagcuguaugaguguaugugauaucauaaagcuagagaaccgaauguaa	ucuuugguuaucuagcuguaugaguguaugugauaucauaaagcuagagaaccgaauguaa	ucuuugguuaucuagcuguaugaguguaugugauaucauaaagcuagagaaccgaauguaa	ucuuugguuaucuagcuguaugaguguaugugauaucauaaagcuagagaaccgaauguaa	ucuuugguuaucuagcuguaugaguguaugugauaucauaaagcuagagaaccgaauguaa	uaaagcuagagaaccgaauguaa	uaaagcuagagaaccgaauguaa	uaaagcuagagaaccgaauguaa	uaaagcuagagaaccgaauguaa	uaaagcuagagaaccgaauguaa	uaaagcuagagaaccgaauguaa	uaaagcuagagaaccgaauguaa	uaaagcuagagaaccgaauguaa	uaaagcuagagaaccgaauguaa	323	223	398	110	210	102	98	60	133	39.2094	28.2387	40.3602	13.2501	25.1328	11.6444	10.3471	6.71808	11.9845
263	cli-miR-9-5p	ucuuugguuaucuagcuguaugaguguaugugauaucauaaagcuagagaaccgaauguaa	ucuuugguuaucuagcuguaugaguguaugugauaucauaaagcuagagaaccgaauguaa	ucuuugguuaucuagcuguaugaguguaugugauaucauaaagcuagagaaccgaauguaa	ucuuugguuaucuagcuguaugaguguaugugauaucauaaagcuagagaaccgaauguaa	ucuuugguuaucuagcuguaugaguguaugugauaucauaaagcuagagaaccgaauguaa	ucuuugguuaucuagcuguaugaguguaugugauaucauaaagcuagagaaccgaauguaa	ucuuugguuaucuagcuguaugaguguaugugauaucauaaagcuagagaaccgaauguaa	ucuuugguuaucuagcuguaugaguguaugugauaucauaaagcuagagaaccgaauguaa	ucuuugguuaucuagcuguaugaguguaugugauaucauaaagcuagagaaccgaauguaa	ucuuugguuaucuagcuguauga	ucuuugguuaucuagcuguauga	ucuuugguuaucuagcuguauga	ucuuugguuaucuagcuguauga	ucuuugguuaucuagcuguauga	ucuuugguuaucuagcuguauga	ucuuugguuaucuagcuguauga	ucuuugguuaucuagcuguauga	ucuuugguuaucuagcuguauga	1555	939	1558	222	741	446	90	67	276	188.764	118.906	157.993	26.7411	88.6829	50.9156	9.50245	7.50185	24.8701
264	cli-miR-9615-3p	ucucccauggcuguauaacccuuucgauauccuuggauugcacagcuuugguaggaag	ucucccauggcuguauaacccuuucgauauccuuggauugcacagcuuugguaggaag	ucucccauggcuguauaacccuuucgauauccuuggauugcacagcuuugguaggaag	uuucucccauggcuguauaacccuuucgauauccuuggauugcacagcuuugguaggaagc	uuucucccauggcuguauaacccuuucgauauccuuggauugcacagcuuugguaggaag	uuucucccauggcuguauaacccuuucgauauccuuggauugcacagcuuugguaggaag	null	null	null	uugcacagcuuugguaggaag	uugcacagcuuugguaggaag	uugcacagcuuugguaggaag	uugcacagcuuugguaggaagc	uugcacagcuuugguaggaag	auugcacagcuuugguaggaag	null	null	null	44	26	19	1	13	5	0	0	0	5.34122	3.2924	1.92674	0.120455	1.55584	0.570803	0	0	0
265	cli-miR-9615-5p	ucucccauggcuguauaacccuuucgauauccuuggauugcacagcuuugguaggaag	ucucccauggcuguauaacccuuucgauauccuuggauugcacagcuuugguaggaag	ucucccauggcuguauaacccuuucgauauccuuggauugcacagcuuugguaggaag	uuucucccauggcuguauaacccuuucgauauccuuggauugcacagcuuugguaggaagc	uuucucccauggcuguauaacccuuucgauauccuuggauugcacagcuuugguaggaag	uuucucccauggcuguauaacccuuucgauauccuuggauugcacagcuuugguaggaag	null	null	null	ucucccauggcuguauaaccc	ucucccauggcuguauaaccc	ucucccauggcuguauaaccc	uuucucccauggcuguauaacc	uuucucccauggcuguauaaccc	uuucucccauggcuguauaaccc	null	null	null	173	97	85	6	18	7	0	0	0	21.0007	12.2832	8.61965	0.722733	2.15424	0.799124	0	0	0
266	cli-miR-9616-3p	ugcggccuggggcagcgcaaaccccacuuuaggguggaaaacacaagguugagcugauccaggccuggcc	cugcggccuggggcagcgcaaaccccacuuuaggguggaaaacacaagguugagcugauccaggccuggcc	ugcggccuggggcagcgcaaaccccacuuuaggguggaaaacacaagguugagcugauccaggccuggccu	ugcggccuggggcagcgcaaaccccacuuuaggguggaaaacacaagguugagcugauccaggccuggc	ugcggccuggggcagcgcaaaccccacuuuaggguggaaaacacaagguugagcugauccaggccuggc	gcugcggccuggggcagcgcaaaccccacuuuaggguggaaaacacaagguugagcugauccaggccuggccu	cugcggccuggggcagcgcaaaccccacuuuaggguggaaaacacaagguugagcugauccaggccuggc	ugcggccuggggcagcgcaaaccccacuuuaggguggaaaacacaagguugagcugauccaggccuggc	ugcggccuggggcagcgcaaaccccacuuuaggguggaaaacacaagguugagcugauccaggccuggc	uugagcugauccaggccuggcc	uugagcugauccaggccuggcc	uugagcugauccaggccuggccu	uugagcugauccaggccuggc	uugagcugauccaggccuggc	uugagcugauccaggccuggccu	uugagcugauccaggccuggc	uugagcugauccaggccuggc	uugagcugauccaggccuggc	28	24	20	4	10	6	2	7	5	3.39896	3.03914	2.02815	0.481822	1.1968	0.684963	0.211166	0.783776	0.450545
267	cli-miR-9616-5p	ugcggccuggggcagcgcaaaccccacuuuaggguggaaaacacaagguugagcugauccaggccuggcc	cugcggccuggggcagcgcaaaccccacuuuaggguggaaaacacaagguugagcugauccaggccuggcc	ugcggccuggggcagcgcaaaccccacuuuaggguggaaaacacaagguugagcugauccaggccuggccu	ugcggccuggggcagcgcaaaccccacuuuaggguggaaaacacaagguugagcugauccaggccuggc	ugcggccuggggcagcgcaaaccccacuuuaggguggaaaacacaagguugagcugauccaggccuggc	gcugcggccuggggcagcgcaaaccccacuuuaggguggaaaacacaagguugagcugauccaggccuggccu	cugcggccuggggcagcgcaaaccccacuuuaggguggaaaacacaagguugagcugauccaggccuggc	ugcggccuggggcagcgcaaaccccacuuuaggguggaaaacacaagguugagcugauccaggccuggc	ugcggccuggggcagcgcaaaccccacuuuaggguggaaaacacaagguugagcugauccaggccuggc	ugcggccuggggcagcgcaaacc	cugcggccuggggcagcgcaaacc	ugcggccuggggcagcgcaaacc	ugcggccuggggcagcgcaaacc	ugcggccuggggcagcgcaaacc	gcugcggccuggggcagcgcaaacc	cugcggccuggggcagcgcaaac	ugcggccuggggcagcgcaaacc	ugcggccuggggcagcgcaaacc	1	0	3	0	0	0	1	2	0	0.121391	0	0.304223	0	0	0	0.105583	0.223936	0
268	cli-miR-9617-3p	uuaugaucauaaggauaaaugagccccaucgaguaauuaauuuauccguaugaucauaagaca	uuaugaucauaaggauaaaugagccccaucgaguaauuaauuuauccguaugaucauaagaca	uaugaucauaaggauaaaugagccccaucgaguaauuaauuuauccguaugaucauaagaca	uuaugaucauaaggauaaaugagccccaucgaguaauuaauuuauccguaugaucauaagaca	uuaugaucauaaggauaaaugagccccaucgaguaauuaauuuauccguaugaucauaagaca	uuaugaucauaaggauaaaugagccccaucgaguaauuaauuuauccguaugaucauaagaca	uuaugaucauaaggauaaaugagccccaucgaguaauuaauuuauccguaugaucauaagaca	ugucuuaugaucauaaggauaaaugagccccaucgaguaauuaauuuauccguaugaucauaagaca	ugucuuaugaucauaaggauaaaugagccccaucgaguaauuaauuuauccguaugaucauaagaca	uuauccguaugaucauaagaca	uuauccguaugaucauaagaca	uuauccguaugaucauaagaca	uuauccguaugaucauaagaca	uuauccguaugaucauaagaca	uuauccguaugaucauaagaca	uuauccguaugaucauaagaca	uuauccguaugaucauaagaca	uuauccguaugaucauaagaca	22	62	67	146	117	101	145	177	155	2.67061	7.85112	6.79431	17.5865	14.0026	11.5302	15.3095	19.8183	13.9669
269	cli-miR-9617-5p	uuaugaucauaaggauaaaugagccccaucgaguaauuaauuuauccguaugaucauaagaca	uuaugaucauaaggauaaaugagccccaucgaguaauuaauuuauccguaugaucauaagaca	uaugaucauaaggauaaaugagccccaucgaguaauuaauuuauccguaugaucauaagaca	uuaugaucauaaggauaaaugagccccaucgaguaauuaauuuauccguaugaucauaagaca	uuaugaucauaaggauaaaugagccccaucgaguaauuaauuuauccguaugaucauaagaca	uuaugaucauaaggauaaaugagccccaucgaguaauuaauuuauccguaugaucauaagaca	uuaugaucauaaggauaaaugagccccaucgaguaauuaauuuauccguaugaucauaagaca	ugucuuaugaucauaaggauaaaugagccccaucgaguaauuaauuuauccguaugaucauaagaca	ugucuuaugaucauaaggauaaaugagccccaucgaguaauuaauuuauccguaugaucauaagaca	uuaugaucauaaggauaaauga	uuaugaucauaaggauaaaug	uaugaucauaaggauaaaugagc	uuaugaucauaaggauaaauga	uuaugaucauaaggauaaauga	uuaugaucauaaggauaaauga	uuaugaucauaaggauaaauga	ugucuuaugaucauaaggaua	ugucuuaugaucauaaggaua	3	5	1	9	5	5	6	8	2	0.364174	0.633155	0.101408	1.0841	0.5984	0.570803	0.633497	0.895744	0.180218
270	cli-miR-9618-3p	ccuggcagagggcccacucuuggccggggggacaaagccaucaaagauggacccucugcuggcac	cuggcagagggcccacucuuggccggggggacaaagccaucaaagauggacccucugcuggca	null	null	null	null	null	null	null	aagauggacccucugcuggcac	aaagauggacccucugcuggca	null	null	null	null	null	null	null	9	11	0	0	0	0	0	0	0	1.09252	1.39294	0	0	0	0	0	0	0
271	cli-miR-9619-3p	uauuccuuaaguaggcaaaguugauucuuucacaguuuugccugcucaagggguaga	uuuugccugcucaagggguagaggaauaggcucuaggccugugaaguguuuagugcuuugcugucauauaguucugagaagaggcaguuca	uuuugccugcucaagggguagaggaauaggcucuaggccugugaaguguuuagugcuuugcugucauauaguucugagaagaggcaguuca	auauuccuuaaguaggcaaaguugauucuuucacaguuuugccugcucaagggguaga	uuuugccugcucaagggguagaggaauaggcucuaggccugugaaguguuuagugcuuugcugucauauaguucugagaagaggcaguuca	auuccuuaaguaggcaaaguugauucuuucacaguuuugccugcucaagggguaga	uauuccuuaaguaggcaaaguugauucuuucacaguuuugccugcucaagggguaga	uauuccuuaaguaggcaaaguugauucuuucacaguuuugccugcucaagggguaga	uauuccuuaaguaggcaaaguugauucuuucacaguuuugccugcucaagggguaga	uuuugccugcucaagggguaga	uaguucugagaagaggcaguuca	uaguucugagaagaggcaguuca	uuuugccugcucaagggguaga	uaguucugagaagaggcaguuca	uuuugccugcucaagggguaga	uuuugccugcucaagggguaga	uuuugccugcucaagggguaga	uuuugccugcucaagggguaga	10	0	0	18	0	18	12	7	4	1.21391	0	0	2.1682	0	2.05489	1.26699	0.783776	0.360436
272	cli-miR-9619-5p	uauuccuuaaguaggcaaaguugauucuuucacaguuuugccugcucaagggguaga	uuuugccugcucaagggguagaggaauaggcucuaggccugugaaguguuuagugcuuugcugucauauaguucugagaagaggcaguuca	uuuugccugcucaagggguagaggaauaggcucuaggccugugaaguguuuagugcuuugcugucauauaguucugagaagaggcaguuca	auauuccuuaaguaggcaaaguugauucuuucacaguuuugccugcucaagggguaga	uuuugccugcucaagggguagaggaauaggcucuaggccugugaaguguuuagugcuuugcugucauauaguucugagaagaggcaguuca	auuccuuaaguaggcaaaguugauucuuucacaguuuugccugcucaagggguaga	uauuccuuaaguaggcaaaguugauucuuucacaguuuugccugcucaagggguaga	uauuccuuaaguaggcaaaguugauucuuucacaguuuugccugcucaagggguaga	uauuccuuaaguaggcaaaguugauucuuucacaguuuugccugcucaagggguaga	uauuccuuaaguaggcaaaguu	uuuugccugcucaagggguaga	uuuugccugcucaagggguaga	auauuccuuaaguaggcaaagu	uuuugccugcucaagggguaga	auuccuuaaguaggcaaaguug	uauuccuuaaguaggcaaaguu	uauuccuuaaguaggcaaaguu	uauuccuuaaguaggcaaaguu	0	13	6	1	14	1	0	0	0	0	1.6462	0.608446	0.120455	1.67552	0.114161	0	0	0
273	cli-miR-9620-3p	uuuaggagaaaaaucucaguuauugcacuuuguguaaauucaauaacuaagauauuucuccugaagg	null	null	null	null	null	uuuaggagaaaaaucucaguuauugcacuuuguguaaauucaauaacuaagauauuucuccugaagg	null	null	acuaagauauuucuccugaagg	null	null	null	null	null	acuaagauauuucuccugaagg	null	null	2	0	0	0	0	0	2	0	0	0.242783	0	0	0	0	0	0.211166	0	0
274	cli-miR-9620-5p	uuuaggagaaaaaucucaguuauugcacuuuguguaaauucaauaacuaagauauuucuccugaagg	null	null	null	null	null	uuuaggagaaaaaucucaguuauugcacuuuguguaaauucaauaacuaagauauuucuccugaagg	null	null	uuuaggagaaaaaucucaguu	null	null	null	null	null	uuuaggagaaaaaucucaguua	null	null	1	0	0	0	0	0	0	0	0	0.121391	0	0	0	0	0	0	0	0
275	cli-miR-9621-3p	ucccguugggaugcauucugucagaaugcaccucaucaggauacaucccaucgggaug	ucccguugggaugcauucugucagaaugcaccucaucaggauacaucccaucgggaug	ucccguugggaugcauucugucagaaugcaccucaucaggauacaucccaucgggaug	ucccguugggaugcauucugucagaaugcaccucaucaggauacaucccaucgggaug	ucccguugggaugcauucugucagaaugcaccucaucaggauacaucccaucgggaug	ucccguugggaugcauucugucagaaugcaccucaucaggauacaucccaucgggaug	null	null	null	caggauacaucccaucgggaug	caggauacaucccaucgggaug	caggauacaucccaucgggaug	caggauacaucccaucgggaug	aggauacaucccaucgggaug	aggauacaucccaucgggaug	null	null	null	5	4	2	2	0	0	0	0	0	0.606957	0.506524	0.202815	0.240911	0	0	0	0	0
276	cli-miR-9621-5p	ucccguugggaugcauucugucagaaugcaccucaucaggauacaucccaucgggaug	ucccguugggaugcauucugucagaaugcaccucaucaggauacaucccaucgggaug	ucccguugggaugcauucugucagaaugcaccucaucaggauacaucccaucgggaug	ucccguugggaugcauucugucagaaugcaccucaucaggauacaucccaucgggaug	ucccguugggaugcauucugucagaaugcaccucaucaggauacaucccaucgggaug	ucccguugggaugcauucugucagaaugcaccucaucaggauacaucccaucgggaug	null	null	null	ucccguugggaugcauucugu	ucccguugggaugcauucugu	ucccguugggaugcauucuguc	ucccguugggaugcauucuguc	ucccguugggaugcauucugu	ucccguugggaugcauucugu	null	null	null	49	31	32	2	6	5	0	0	0	5.94818	3.92556	3.24504	0.240911	0.71808	0.570803	0	0	0
277	cli-miR-9623-5p	uaccuuuaaauccuggucuggacaagguccuagaguugacaucucuagcugggucaaagagcug	null	auaccuuuaaauccuggucuggacaagguccuagaguugacaucucuagcugggucaaagagcugc	null	null	null	null	null	null	uaccuuuaaauccuggucugga	null	auaccuuuaaauccuggucugga	null	null	null	null	null	null	30	0	14	0	0	0	0	0	0	3.64174	0	1.41971	0	0	0	0	0	0
278	cli-miR-9625-3p	cugucggagccgauguucuagcuggaaugaaaaacggcugacgcuggcaccgagagccc	null	null	null	null	null	null	null	null	cugacgcuggcaccgagagccc	null	null	null	null	null	null	null	null	3	0	0	0	0	0	0	0	0	0.364174	0	0	0	0	0	0	0	0
279	cli-miR-9625-5p	cugucggagccgauguucuagcuggaaugaaaaacggcugacgcuggcaccgagagccc	null	null	null	null	null	null	null	null	cugucggagccgauguucuagc	null	null	null	null	null	null	null	null	1	0	0	0	0	0	0	0	0	0.121391	0	0	0	0	0	0	0	0
280	cli-miR-9626-5p	agggcuuggagaaauaacacgcuaaagaguuucagcugguguggucucucucugcccagu	cagggcuuggagaaauaacacgcuaaagaguuucagcugguguggucucucucugcccagu	null	null	null	null	null	null	null	agggcuuggagaaauaacacgcu	cagggcuuggagaaauaacacgcu	null	null	null	null	null	null	null	2	3	0	0	0	0	0	0	0	0.242783	0.379893	0	0	0	0	0	0	0
281	cli-miR-9627-3p	caggagcagugccaaggcugggcuggcucugcgccucagcgugggcacugcuccagac	null	caggagcagugccaaggcugggcuggcucugcgccucagcgugggcacugcuccagac	caggagcagugccaaggcugggcuggcucugcgccucagcgugggcacugcuccagac	caggagcagugccaaggcugggcuggcucugcgccucagcgugggcacugcuccagac	null	null	null	null	cagcgugggcacugcuccagac	null	cagcgugggcacugcuccagac	cagcgugggcacugcuccagac	cagcgugggcacugcuccagac	null	null	null	null	12	0	8	2	5	0	0	0	0	1.4567	0	0.811261	0.240911	0.5984	0	0	0	0
282	cli-miR-9627-5p	caggagcagugccaaggcugggcuggcucugcgccucagcgugggcacugcuccagac	null	caggagcagugccaaggcugggcuggcucugcgccucagcgugggcacugcuccagac	caggagcagugccaaggcugggcuggcucugcgccucagcgugggcacugcuccagac	caggagcagugccaaggcugggcuggcucugcgccucagcgugggcacugcuccagac	null	null	null	null	caggagcagugccaaggcugggc	null	caggagcagugccaaggcuggg	caggagcagugccaaggcuggg	caggagcagugccaaggcuggg	null	null	null	null	4	0	1	1	0	0	0	0	0	0.485565	0	0.101408	0.120455	0	0	0	0	0
283	cli-miR-9628-5p	null	null	cacagucuggcagggcuugcagaggccacagagaacuaccuggaggcuuugccagccuggg	null	cagucuggcagggcuugcagaggccacagagaacuaccuggaggcuuugccagccuggg	null	null	cacagucuggcagggcuugcagaggccacagagaacuaccuggaggcuuugccagccugggcc	null	null	null	cacagucuggcagggcuugcag	null	cagucuggcagggcuugcaga	null	null	cacagucuggcagggcuugcag	null	0	0	7	0	8	0	0	3	0	0	0	0.709853	0	0.957441	0	0	0.335904	0
284	cli-miR-9630-5p	null	null	null	null	null	null	ggcgacacucggggcucuuggcgugggccauucccgaccaucugauccccugcucccgccgu	null	null	null	null	null	null	null	null	ggcgacacucggggcucuuggc	null	null	0	0	0	0	0	0	3	0	0	0	0	0	0	0	0	0.316748	0	0
285	cli-miR-9631-3p	null	null	uagccaggugccucaucucaugccuguggaaaaaccugugugagaggagugucugacugu	null	null	null	uagccaggugccucaucucaugccuguggaaaaaccugugugagaggagugucugacuguu	null	null	null	null	gugagaggagugucugacugu	null	null	null	gugagaggagugucugacuguu	null	null	0	0	2	0	0	0	2	0	0	0	0	0.202815	0	0	0	0.211166	0	0
286	cli-miR-9631-5p	null	null	uagccaggugccucaucucaugccuguggaaaaaccugugugagaggagugucugacugu	null	null	null	uagccaggugccucaucucaugccuguggaaaaaccugugugagaggagugucugacuguu	null	null	null	null	uagccaggugccucaucucaugcc	null	null	null	uagccaggugccucaucucaugc	null	null	0	0	2	0	0	0	0	0	0	0	0	0.202815	0	0	0	0	0	0
287	cli-miR-9633-5p	null	null	null	null	null	agaggauggagcugaaugggauuuugcugccugaaauggucccauccagccccaguccugcugc	null	null	null	null	null	null	null	null	agaggauggagcugaauggg	null	null	null	0	0	0	0	0	3	0	0	0	0	0	0	0	0	0.342482	0	0	0
288	cli-miR-9636-3p	cgcaaaaccaguggguaccuuguagaagggacugguggagaguggacaaguacccgcugguuugcuug	null	cgcaaaaccaguggguaccuuguagaagggacugguggagaguggacaaguacccgcugguuugcuug	null	null	null	null	null	null	caaguacccgcugguuugcuug	null	caaguacccgcugguuugcuug	null	null	null	null	null	null	2	0	2	0	0	0	0	0	0	0.242783	0	0.202815	0	0	0	0	0	0
289	cli-miR-9636-5p	cgcaaaaccaguggguaccuuguagaagggacugguggagaguggacaaguacccgcugguuugcuug	null	cgcaaaaccaguggguaccuuguagaagggacugguggagaguggacaaguacccgcugguuugcuug	null	null	null	null	null	null	cgcaaaaccaguggguaccuugu	null	cgcaaaaccaguggguaccuugu	null	null	null	null	null	null	2	0	3	0	0	0	0	0	0	0.242783	0	0.304223	0	0	0	0	0	0
290	cli-miR-9637-3p	null	ccucaggaccaggugccuucuccuguucccugcugaagucuuccuuguccugacagg	cucaggaccaggugccuucuccuguucccugcugaagucuuccuuguccugac	null	ccucaggaccaggugccuucuccuguucccugcugaagucuuccuuguccugacag	null	null	ccucaggaccaggugccuucuccuguucccugcugaagucuuccuuguccugacagg	null	null	aagucuuccuuguccugacagg	ugaagucuuccuuguccugac	null	ugaagucuuccuuguccugacag	null	null	aagucuuccuuguccugacagg	null	0	0	1	0	2	0	0	0	0	0	0	0.101408	0	0.23936	0	0	0	0
291	cli-miR-9637-5p	null	ccucaggaccaggugccuucuccuguucccugcugaagucuuccuuguccugacagg	cucaggaccaggugccuucuccuguucccugcugaagucuuccuuguccugac	null	ccucaggaccaggugccuucuccuguucccugcugaagucuuccuuguccugacag	null	null	ccucaggaccaggugccuucuccuguucccugcugaagucuuccuuguccugacagg	null	null	ccucaggaccaggugccuucu	cucaggaccaggugccuucuc	null	ccucaggaccaggugccuucu	null	null	ccucaggaccaggugccuucu	null	0	7	4	0	5	0	0	5	0	0	0.886416	0.40563	0	0.5984	0	0	0.55984	0
292	cli-miR-9638-3p	null	null	null	agcaaggaccacuuaguccugcucuccucucucucacgccacaggucuaagugguccucgcugc	agcaaggaccacuuaguccugcucuccucucucucacgccacaggucuaagugguccucgcugc	agcaaggaccacuuaguccugcucuccucucucucacgccacaggucuaagugguccucgcugc	agcaaggaccacuuaguccugcucuccucucucucacgccacaggucuaagugguccucgcugc	agcaaggaccacuuaguccugcucuccucucucucacgccacaggucuaagugguccucgcugc	agcaaggaccacuuaguccugcucuccucucucucacgccacaggucuaagugguccucgcugc	null	null	null	aggucuaagugguccucgcugc	aggucuaagugguccucgcugc	aggucuaagugguccucgcugc	aggucuaagugguccucgcugc	aggucuaagugguccucgcugc	ggucuaagugguccucgcugc	0	0	0	4	9	4	4	3	7	0	0	0	0.481822	1.07712	0.456642	0.422331	0.335904	0.630762
293	cli-miR-9638-5p	null	null	null	agcaaggaccacuuaguccugcucuccucucucucacgccacaggucuaagugguccucgcugc	agcaaggaccacuuaguccugcucuccucucucucacgccacaggucuaagugguccucgcugc	agcaaggaccacuuaguccugcucuccucucucucacgccacaggucuaagugguccucgcugc	agcaaggaccacuuaguccugcucuccucucucucacgccacaggucuaagugguccucgcugc	agcaaggaccacuuaguccugcucuccucucucucacgccacaggucuaagugguccucgcugc	agcaaggaccacuuaguccugcucuccucucucucacgccacaggucuaagugguccucgcugc	null	null	null	agcaaggaccacuuaguccugc	agcaaggaccacuuaguccugc	agcaaggaccacuuaguccugc	agcaaggaccacuuaguccugc	agcaaggaccacuuaguccugc	agcaaggaccacuuaguccugc	0	0	0	2	0	0	2	1	1	0	0	0	0.240911	0	0	0.211166	0.111968	0.0901089
294	cli-miR-9639-5p	null	aaggagccgguagcugugcagcccgcuguccgacagcgcugcugagcucacggcaccgacc	null	null	null	null	null	null	null	null	aaggagccgguagcugugcag	null	null	null	null	null	null	null	0	4	0	0	0	0	0	0	0	0	0.506524	0	0	0	0	0	0	0
295	cli-miR-9640-3p	null	null	null	null	null	null	gagccucgcgcugacucugaagguucugguaacucgacuucagauggcagagcugaggcugc	gagccucgcgcugacucugaagguucugguaacucgacuucagauggcagagcugaggcugc	gagccucgcgcugacucugaagguucugguaacucgacuucagauggcagagcugaggcugc	null	null	null	null	null	null	ucagauggcagagcugaggcugc	ucagauggcagagcugaggcugc	ucagauggcagagcugaggcugc	0	0	0	0	0	0	6	3	1	0	0	0	0	0	0	0.633497	0.335904	0.0901089
296	cli-miR-9640-5p	null	null	null	null	null	null	gagccucgcgcugacucugaagguucugguaacucgacuucagauggcagagcugaggcugc	gagccucgcgcugacucugaagguucugguaacucgacuucagauggcagagcugaggcugc	gagccucgcgcugacucugaagguucugguaacucgacuucagauggcagagcugaggcugc	null	null	null	null	null	null	gagccucgcgcugacucugaag	gagccucgcgcugacucugaag	gagccucgcgcugacucugaag	0	0	0	0	0	0	4	3	3	0	0	0	0	0	0	0.422331	0.335904	0.270327
297	cli-miR-9641-3p	accgcuggcacguuggagcccucgccuuugugccucucggcgagcgugaugugccacggcuc	null	null	null	null	accgcuggcacguuggagcccucgccuuugugccucucggcgagcgugaugugccacggcuc	null	null	null	cgagcgugaugugccacggcuc	null	null	null	null	cgagcgugaugugccacggcuc	null	null	null	2	0	0	0	0	2	0	0	0	0.242783	0	0	0	0	0.228321	0	0	0
298	cli-miR-9641-5p	accgcuggcacguuggagcccucgccuuugugccucucggcgagcgugaugugccacggcuc	null	null	null	null	accgcuggcacguuggagcccucgccuuugugccucucggcgagcgugaugugccacggcuc	null	null	null	accgcuggcacguuggagcccucgcc	null	null	null	null	accgcuggcacguuggagcccucgcc	null	null	null	4	0	0	0	0	0	0	0	0	0.485565	0	0	0	0	0	0	0	0
299	cli-miR-9645-3p	uugccaccacagugggcugcugcaggacacauagccggagcacacgguggugguacc	uugccaccacagugggcugcugcaggacacauagccggagcacacgguggugguacc	null	null	null	null	null	null	null	cggagcacacgguggugguacc	cggagcacacgguggugguacc	null	null	null	null	null	null	null	3	2	0	0	0	0	0	0	0	0.364174	0.253262	0	0	0	0	0	0	0
300	cli-miR-9645-5p	uugccaccacagugggcugcugcaggacacauagccggagcacacgguggugguacc	uugccaccacagugggcugcugcaggacacauagccggagcacacgguggugguacc	null	null	null	null	null	null	null	uugccaccacagugggcugcug	uugccaccacagugggcugcug	null	null	null	null	null	null	null	6	3	0	0	0	0	0	0	0	0.728348	0.379893	0	0	0	0	0	0	0
301	cli-miR-9646-3p	null	null	null	null	cgauuguugguaguguucuuuauaaaaacgauaaagaacacuaccaacgaccggu	null	null	null	null	null	null	null	null	aagaacacuaccaacgaccggu	null	null	null	null	0	0	0	0	13	0	0	0	0	0	0	0	0	1.55584	0	0	0	0
302	cli-miR-96-5p	uuuggcacuagcacauuuuugcuuugauuuguagcuuuugagcaauuauguguagugccaauau	uuuggcacuagcacauuuuugcuuugauuuguagcuuuugagcaauuauguguagugccaauau	uuuggcacuagcacauuuuugcuuugauuuguagcuuuugagcaauuauguguagugccaauau	uuuggcacuagcacauuuuugcuuugauuuguagcuuuugagcaauuauguguagugccaauau	uuuggcacuagcacauuuuugcuuugauuuguagcuuuugagcaauuauguguagugccaauau	uuuggcacuagcacauuuuugcuuugauuuguagcuuuugagcaauuauguguagugccaauau	uuuggcacuagcacauuuuugcuuugauuuguagcuuuugagcaauuauguguagugccaauau	null	uuuggcacuagcacauuuuugcuuugauuuguagcuuuugagcaauuauguguagugccaauau	uuuggcacuagcacauuuuugcu	uuuggcacuagcacauuuuugcu	uuuggcacuagcacauuuuugcu	uuuggcacuagcacauuuuugcu	uuuggcacuagcacauuuuugcu	uuuggcacuagcacauuuuugcu	uuuggcacuagcacauuuuugcu	null	uuuggcacuagcacauuuuugcu	7	9	28	4	11	98	12	0	19	0.849739	1.13968	2.83941	0.481822	1.31648	11.1877	1.26699	0	1.71207
303	cli-miR-99-3p	aacccguagauccgaucuuguguugaaacgcacugcacaagcucgcuucuaugggucugu	aacccguagauccgaucuuguguugaaacgcacugcacaagcucgcuucuaugggucugu	aacccguagauccgaucuuguguugaaacgcacugcacaagcucgcuucuaugggucugu	aacccguagauccgaucuuguguugaaacgcacugcacaagcucgcuucuaugggucugu	aacccguagauccgaucuuguguugaaacgcacugcacaagcucgcuucuaugggucugu	aacccguagauccgaucuuguguugaaacgcacugcacaagcucgcuucuaugggucugu	aacccguagauccgaucuuguguugaaacgcacugcacaagcucgcuucuaugggucugu	aacccguagauccgaucuuguguugaaacgcacugcacaagcucgcuucuaugggucugu	aacccguagauccgaucuuguguugaaacgcacugcacaagcucgcuucuaugggucugu	caagcucgcuucuaugggucugu	caagcucgcuucuaugggucugu	caagcucgcuucuaugggucugu	caagcucgcuucuaugggucugu	caagcucgcuucuaugggucugu	caagcucgcuucuaugggucugu	caagcucgcuucuaugggucugu	caagcucgcuucuaugggucugu	caagcucgcuucuaugggucugu	735	579	691	725	931	900	889	772	557	89.2226	73.3193	70.0727	87.3302	111.422	102.744	93.8631	86.4393	50.1907
304	cli-miR-99-5p	aacccguagauccgaucuuguguugaaacgcacugcacaagcucgcuucuaugggucugu	aacccguagauccgaucuuguguugaaacgcacugcacaagcucgcuucuaugggucugu	aacccguagauccgaucuuguguugaaacgcacugcacaagcucgcuucuaugggucugu	aacccguagauccgaucuuguguugaaacgcacugcacaagcucgcuucuaugggucugu	aacccguagauccgaucuuguguugaaacgcacugcacaagcucgcuucuaugggucugu	aacccguagauccgaucuuguguugaaacgcacugcacaagcucgcuucuaugggucugu	aacccguagauccgaucuuguguugaaacgcacugcacaagcucgcuucuaugggucugu	aacccguagauccgaucuuguguugaaacgcacugcacaagcucgcuucuaugggucugu	aacccguagauccgaucuuguguugaaacgcacugcacaagcucgcuucuaugggucugu	aacccguagauccgaucuugug	aacccguagauccgaucuugug	aacccguagauccgaucuugug	aacccguagauccgaucuugug	aacccguagauccgaucuugug	aacccguagauccgaucuugug	aacccguagauccgaucuugug	aacccguagauccgaucuugug	aacccguagauccgaucuugug	5145	4744	4729	2787	3439	3148	2428	2761	2165	624.558	600.737	479.557	335.709	411.58	359.377	256.355	309.144	195.086
