# Supplementary material for: Identification and expression pattern analysis of miRNAs in pectoral muscle during pigeon (Columba livia) development
Source: PeerJ. 2021 Jun 23;9:e11438. doi: 10.7717/peerj.11438 (PMC8234919; doi:10.7717/peerj.11438)
Supplement: Supplemental Information 5 [file peerj-09-11438-s005.xlsx]

## Sheet: Sheet1
Table S4. Conserved miRNA group identified in this study.
ID	miR Name	Pre-miRNA sequence									Sequence of mature miRNAs									Expression of mature miRNAs (Read Counts)									Expression of mature miRNAs (RPM)
	miR Name	1d_1	1d_2	1d_3	28d_1	28d_2	28d_3	2yr_1	2yr_2	2yr_3	1d_1	1d_2	1d_3	28d_1	28d_2	28d_3	2yr_1	2yr_2	2yr_3	1d_1	1d_2	1d_3	28d_1	28d_2	28d_3	2yr_1	2yr_2	2yr_3	1d_1	1d_2	1d_3	28d_1	28d_2	28d_3	2yr_1	2yr_2	2yr_3
1	conserve-cli-miR-10172-3p	ccacugggccugggugaaggugcaugcugcccuacagcagggcagugcagcagcucuccugggccuggugccc	ccacugggccugggugaaggugcaugcugcccuacagcagggcagugcagcagcucuccugggccuggugccc	ccacugggccugggugaaggugcaugcugcccuacagcagggcagugcagcagcucuccugggccuggugccc	ccacugggccugggugaaggugcaugcugcccuacagcagggcagugcagcagcucuccugggccuggugccc	cccugugccuucagcccaaggggucugagggacagucugcu	uccugagagcugaugcccauagccugcuggcuggggcaugccuaggagg	ccacugggccugggugaaggugcaugcugcccuacagcagggcagugcagcagcucuccugggccuggugccc	ccacugggccugggugaaggugcaugcugcccuacagcagggcagugcagcagcucuccugggccuggugccc	ccacugggccugggugaaggugcaugcugcccuacagcagggcagugcagcagcucuccugggccuggugccc	cuccugggccuggugccc	cuccugggccuggugccc	cuccugggccuggugccc	cuccugggccuggugccc	ucugagggacagucugcu	ggcaugccuaggagg	cuccugggccuggugccc	cuccugggccuggugccc	cuccugggccuggugccc	0	0	0	0	2	0	0	0	0	0	0	0	0	0.23936	0	0	0	0
2	conserve-cli-miR-10172-5p	ccacugggccugggugaaggugcaugcugcccuacagcagggcagugcagcagcucuccugggccuggugccc	ccacugggccugggugaaggugcaugcugcccuacagcagggcagugcagcagcucuccugggccuggugccc	ccacugggccugggugaaggugcaugcugcccuacagcagggcagugcagcagcucuccugggccuggugccc	ccacugggccugggugaaggugcaugcugcccuacagcagggcagugcagcagcucuccugggccuggugccc	cccugugccuucagcccaaggggucugagggacagucugcu	uccugagagcugaugcccauagccugcuggcuggggcaugccuaggagg	ccacugggccugggugaaggugcaugcugcccuacagcagggcagugcagcagcucuccugggccuggugccc	ccacugggccugggugaaggugcaugcugcccuacagcagggcagugcagcagcucuccugggccuggugccc	ccacugggccugggugaaggugcaugcugcccuacagcagggcagugcagcagcucuccugggccuggugccc	ccacugggccugggugaa	ccacugggccugggugaa	ccacugggccugggugaa	ccacugggccugggugaa	cccugugccuucagccc	uccugagagcugaugccca	ccacugggccugggugaa	ccacugggccugggugaa	ccacugggccugggugaa	0	0	0	0	0	2	0	0	0	0	0	0	0	0	0.228321	0	0	0
3	conserve-cli-miR-10399-5p	caaaagguucauguuuuauacauuuuguguagauuacaguagaaucuugcu	caaaagguucauguuuuauacauuuuguguagauuacaguagaaucuugcu	aaaagacggacucaauuucagagauauagugauuucaaauugguuccauguuuuug	caaaagguucauguuuuauacauuuuguguagauuacaguagaaucuugcu	aaaagacggacucaauuucagagauauagugauuucaaauugguuccauguuuuug	caaaagguucauguuuuauacauuuuguguagauuacaguagaaucuugcu	caaaagguucauguuuuauacauuuuguguagauuacaguagaaucuugcu	caaaagguucauguuuuauacauuuuguguagauuacaguagaaucuugcu	caaaagguucauguuuuauacauuuuguguagauuacaguagaaucuugcu	caaaagguucauguuuua	caaaagguucauguuuua	aaaagacggacucaauuucaga	caaaagguucauguuuua	aaaagacggacucaauuucaga	caaaagguucauguuuua	caaaagguucauguuuua	caaaagguucauguuuua	caaaagguucauguuuua	0	0	4	0	13	0	0	0	0	0	0	0.40563	0	1.55584	0	0	0	0
4	conserve-cli-miR-1197-3p	aggacacucugaagcaaucuggugauaauauuccagguuucuuuaggugugucuugg	aaggacacucugaagcaaucuggugauaauauuccagguuucuuuaggugugucuuggc	aggacacucugaagcaaucuggugauaauauuccagguuucuuuaggugugucuugg	aaggacacucugaagcaaucuggugauaauauuccagguuucuuuaggugugucuuggc	aaggacacucugaagcaaucuggugauaauauuccagguuucuuuaggugugucuuggc	aaggacacucugaagcaaucuggugauaauauuccagguuucuuuaggugugucuuggc	aaggacacucugaagcaaucuggugauaauauuccagguuucuuuaggugugucuuggc	aaggacacucugaagcaaucuggugauaauauuccagguuucuuuaggugugucuuggcu	aaggacacucugaagcaaucuggugauaauauuccagguuucuuuaggugugucuuggc	agguuucuuuaggugugucuugg	guuucuuuaggugugucuuggc	agguuucuuuaggugugucuugg	gguuucuuuaggugugucuuggc	guuucuuuaggugugucuuggc	guuucuuuaggugugucuuggc	gguuucuuuaggugugucuuggc	gguuucuuuaggugugucuuggcu	agguuucuuuaggugugucuuggc	0	0	0	0	1	1	0	4	0	0	0	0	0	0.11968	0.114161	0	0.447872	0
5	conserve-cli-miR-1197-5p	aggacacucugaagcaaucuggugauaauauuccagguuucuuuaggugugucuugg	aaggacacucugaagcaaucuggugauaauauuccagguuucuuuaggugugucuuggc	aggacacucugaagcaaucuggugauaauauuccagguuucuuuaggugugucuugg	aaggacacucugaagcaaucuggugauaauauuccagguuucuuuaggugugucuuggc	aaggacacucugaagcaaucuggugauaauauuccagguuucuuuaggugugucuuggc	aaggacacucugaagcaaucuggugauaauauuccagguuucuuuaggugugucuuggc	aaggacacucugaagcaaucuggugauaauauuccagguuucuuuaggugugucuuggc	aaggacacucugaagcaaucuggugauaauauuccagguuucuuuaggugugucuuggcu	aaggacacucugaagcaaucuggugauaauauuccagguuucuuuaggugugucuuggc	aggacacucugaagcaaucugg	aaggacacucugaagcaaucu	aggacacucugaagcaaucugg	aaggacacucugaagcaaucug	aaggacacucugaagcaaucugg	aaggacacucugaagcaaucugg	aaggacacucugaagcaaucug	aaggacacucugaagcaaucugg	aaggacacucugaagcaaucugg	6	8	7	6	13	9	12	21	8	0.728348	1.01305	0.709853	0.722733	1.55584	1.02744	1.26699	2.35133	0.720871
6	conserve-cli-miR-12073-3p	ccucagcucugccaucugaagucgaguuaccagaaccuucagagucagcgcgaggcu	ccucagcucugccaucugaagucgaguuaccagaaccuucagagucagcgcgaggcu	ccucagcucugccaucugaagucgaguuaccagaaccuucagagucagcgcgaggcu	ccucagcucugccaucugaagucgaguuaccagaaccuucagagucagcgcgaggcu	ccucagcucugccaucugaagucgaguuaccagaaccuucagagucagcgcgaggcu	ccucagcucugccaucugaagucgaguuaccagaaccuucagagucagcgcgaggcu	ccucagcucugccaucugaagucgaguuaccagaaccuucagagucagcgcgaggcu	ccucagcucugccaucugaagucgaguuaccagaaccuucagagucagcgcgaggcu	ccucagcucugccaucugaagucgaguuaccagaaccuucagagucagcgcgaggcu	uucagagucagcgcgaggcu	uucagagucagcgcgaggcu	uucagagucagcgcgaggcu	uucagagucagcgcgaggcu	uucagagucagcgcgaggcu	uucagagucagcgcgaggcu	uucagagucagcgcgaggcu	uucagagucagcgcgaggcu	uucagagucagcgcgaggcu	0	0	0	0	0	0	0	0	3	0	0	0	0	0	0	0	0	0.270327
7	conserve-cli-miR-12083-3p	cagaaugaggccacagaaggagcguuugcuccuucuguggccucauucaccu	cagaaugaggccacagaaggagcguuugcuccuucuguggccucauucaccu	cagaaugaggccacagaaggagcguuugcuccuucuguggccucauucaccu	cagaaugaggccacagaaggagcguuugcuccuucuguggccucauucaccu	cagaaugaggccacagaaggagcguuugcuccuucuguggccucauucaccu	cagaaugaggccacagaaggagcguuugcuccuucuguggccucauucaccu	cagaaugaggccacagaaggagcguuugcuccuucuguggccucauucaccu	cagaaugaggccacagaaggagcguuugcuccuucuguggccucauucaccu	cagaaugaggccacagaaggagcguuugcuccuucuguggccucauucaccu	cuucuguggccucauucaccu	uucuguggccucauucaccu	cuucuguggccucauucaccu	cuucuguggccucauucaccu	cuucuguggccucauucaccu	cuucuguggccucauucaccu	cuucuguggccucauucaccu	cuucuguggccucauucaccu	cuucuguggccucauucaccu	10	9	16	0	0	0	0	0	0	1.21391	1.13968	1.62252	0	0	0	0	0	0
8	conserve-cli-miR-12094-5p	agacuguuuaauuaaaacugguuugaccaguuaaaugagcauuaacg	agacuguuuaauuaaaacugguuugaccaguuaaaugagcauuaacg	agacuguuuaauuaaaacugguuugaccaguuaaaugagcauuaacg	agacuguuuaauuaaaacugguuugaccaguuaaaugagcauuaacg	agacuguuuaauuaaaacugguuugaccaguuaaaugagcauuaacg	agacuguuuaauuaaaacugguuugaccaguuaaaugagcauuaacg	agacuguuuaauuaaaacugguuugaccaguuaaaugagcauuaacg	agacuguuuaauuaaaacugguuugaccaguuaaaugagcauuaacg	agacuguuuaauuaaaacugguuugaccaguuaaaugagcauuaacg	agacuguuuaauuaaaac	agacuguuuaauuaaaac	agacuguuuaauuaaaac	agacuguuuaauuaaaac	agacuguuuaauuaaaac	agacuguuuaauuaaaac	agacuguuuaauuaaaac	agacuguuuaauuaaaac	agacuguuuaauuaaaac	0	549	0	0	0	0	0	0	0	0	69.5204	0	0	0	0	0	0	0
9	conserve-cli-miR-12128-3p	augaguuucaccucucugcucccaaacaguguuggaucagggagggauccucgcac	augaguuucaccucucugcucccaaacaguguuggaucagggagggauccucgcac	ggaaggcaaaaggaccugcccagccuagcagguucucugcugcucc	augaguuucaccucucugcucccaaacaguguuggaucagggagggauccucgcac	augaguuucaccucucugcucccaaacaguguuggaucagggagggauccucgcac	augaguuucaccucucugcucccaaacaguguuggaucagggagggauccucgcac	augaguuucaccucucugcucccaaacaguguuggaucagggagggauccucgcac	augaguuucaccucucugcucccaaacaguguuggaucagggagggauccucgcac	augaguuucaccucucugcucccaaacaguguuggaucagggagggauccucgcac	aucagggagggauccucgcac	aucagggagggauccucgcac	cagguucucugcugcucc	aucagggagggauccucgcac	aucagggagggauccucgcac	aucagggagggauccucgcac	aucagggagggauccucgcac	aucagggagggauccucgcac	aucagggagggauccucgcac	6	0	0	0	0	0	0	0	0	0.728348	0	0	0	0	0	0	0	0
10	conserve-cli-miR-12180-3p	acaggugcucagagucgcgcgguagcuguauugacucucguggccuguacuccuguga	acaggugcucagagucgcgcgguagcuguauugacucucguggccuguacuccuguga	acagggcuggcugauccgugcccuuucacuuaaugauguugcacggauucuugaaccaguccugcu	accaggagucugugcuaccgugugagguuuucucaucauggagcugugacuccuggacu	accaggagucugugcuaccgugugagguuuucucaucauggagcugugacuccuggacu	accaggagucugugcuaccgugugagguuuucucaucauggagcugugacuccuggacu	accaggagucugugcuaccgugugagguuuucucaucauggagcugugacuccuggacu	accaggagucugugcuaccgugugagguuuucucaucauggagcugugacuccuggacu	accaggagucugugcuaccgugugagguuuucucaucauggagcugugacuccuggacu	ucguggccuguacuccuguga	ucguggccuguacuccuguga	cacggauucuugaaccaguccugcu	uggagcugugacuccuggacu	uggagcugugacuccuggacu	uggagcugugacuccuggacu	uggagcugugacuccuggacu	uggagcugugacuccuggacu	uggagcugugacuccuggacu	3	4	1	0	0	0	0	0	6	0.364174	0.506524	0.101408	0	0	0	0	0	0.540653
11	conserve-cli-miR-12180-5p	acaggugcucagagucgcgcgguagcuguauugacucucguggccuguacuccuguga	acaggugcucagagucgcgcgguagcuguauugacucucguggccuguacuccuguga	acagggcuggcugauccgugcccuuucacuuaaugauguugcacggauucuugaaccaguccugcu	accaggagucugugcuaccgugugagguuuucucaucauggagcugugacuccuggacu	accaggagucugugcuaccgugugagguuuucucaucauggagcugugacuccuggacu	accaggagucugugcuaccgugugagguuuucucaucauggagcugugacuccuggacu	accaggagucugugcuaccgugugagguuuucucaucauggagcugugacuccuggacu	accaggagucugugcuaccgugugagguuuucucaucauggagcugugacuccuggacu	accaggagucugugcuaccgugugagguuuucucaucauggagcugugacuccuggacu	acaggugcucagagucgcgcggu	acaggugcucagagucgcgcggu	acagggcuggcugauccgugcc	accaggagucugugcuaccgug	accaggagucugugcuaccgug	accaggagucugugcuaccgug	accaggagucugugcuaccgug	accaggagucugugcuaccgug	accaggagucugugcuaccgug	0	0	6	0	0	0	0	0	0	0	0	0.608446	0	0	0	0	0	0
12	conserve-cli-miR-12188-3p	gggacagcggcaggugggucccagggcuccgcuccgcguuccccuugcaaugggucauucugacccgccuccgcguccuca	gggacagcggcaggugggucccagggcuccgcuccgcguuccccuugcaaugggucauucugacccgccuccgcguccuca	gggacagcggcaggugggucccagggcuccgcuccgcguuccccuugcaaugggucauucugacccgccuccgcguccuca	gggacagcggcaggugggucccagggcuccgcuccgcguuccccuugcaaugggucauucugacccgccuccgcguccuca	gggacagcggcaggugggucccagggcuccgcuccgcguuccccuugcaaugggucauucugacccgccuccgcguccuca	gggacagcggcaggugggucccagggcuccgcuccgcguuccccuugcaaugggucauucugacccgccuccgcguccuca	gcagcgcagcuucggcgagaacuacgugaguggugccaccccggccccgcguccucc	gggacagcggcaggugggucccagggcuccgcuccgcguuccccuugcaaugggucauucugacccgccuccgcguccuca	gggacagcggcaggugggucccagggcuccgcuccgcguuccccuugcaaugggucauucugacccgccuccgcguccuca	gccuccgcguccuca	cgccuccgcguccuca	cgccuccgcguccuca	cgccuccgcguccuca	cgccuccgcguccuca	cgccuccgcguccuca	ccccggccccgcguccucc	cgccuccgcguccuca	cgccuccgcguccuca	0	0	0	0	0	0	18	0	0	0	0	0	0	0	0	1.90049	0	0
13	conserve-cli-miR-12188-5p	gggacagcggcaggugggucccagggcuccgcuccgcguuccccuugcaaugggucauucugacccgccuccgcguccuca	gggacagcggcaggugggucccagggcuccgcuccgcguuccccuugcaaugggucauucugacccgccuccgcguccuca	gggacagcggcaggugggucccagggcuccgcuccgcguuccccuugcaaugggucauucugacccgccuccgcguccuca	gggacagcggcaggugggucccagggcuccgcuccgcguuccccuugcaaugggucauucugacccgccuccgcguccuca	gggacagcggcaggugggucccagggcuccgcuccgcguuccccuugcaaugggucauucugacccgccuccgcguccuca	gggacagcggcaggugggucccagggcuccgcuccgcguuccccuugcaaugggucauucugacccgccuccgcguccuca	gcagcgcagcuucggcgagaacuacgugaguggugccaccccggccccgcguccucc	gggacagcggcaggugggucccagggcuccgcuccgcguuccccuugcaaugggucauucugacccgccuccgcguccuca	gggacagcggcaggugggucccagggcuccgcuccgcguuccccuugcaaugggucauucugacccgccuccgcguccuca	gggacagcggcaggugg	gggacagcggcagguggg	gggacagcggcagguggg	gggacagcggcagguggg	gggacagcggcagguggg	gggacagcggcagguggg	gcagcgcagcuucggcg	gggacagcggcagguggg	gggacagcggcagguggg	18	0	0	6	0	0	0	0	0	2.18504	0	0	0.722733	0	0	0	0	0
14	conserve-cli-miR-12209-3p	cuuggggugcaggagcacccuggggagcagccuagacaaggggagcacccaaggaagcgugaccacccugggca	cuuggggugcaggagcacccuggggagcagccuagacaaggggagcacccaaggaagcgugaccacccugggca	cuuggggugcaggagcacccuggggagcagccuagacaaggggagcacccaaggaagcgugaccacccugggca	cuuggggugcaggagcacccuggggagcagccuagacaaggggagcacccaaggaagcgugaccacccugggca	cuuggggugcaggagcacccuggggagcagccuagacaaggggagcacccaaggaagcgugaccacccugggca	cuuggggugcaggagcacccuggggagcagccuagacaaggggagcacccaaggaagcgugaccacccugggca	cuuggggugcaggagcacccuggggagcagccuagacaaggggagcacccaaggaagcgugaccacccugggca	cuuggggugcaggagcacccuggggagcagccuagacaaggggagcacccaaggaagcgugaccacccugggca	cuuggggugcaggagcacccuggggagcagccuagacaaggggagcacccaaggaagcgugaccacccugggca	gcgugaccacccugggca	gcgugaccacccugggca	gcgugaccacccugggca	gcgugaccacccugggca	gcgugaccacccugggca	gcgugaccacccugggca	gcgugaccacccugggca	gcgugaccacccugggca	gcgugaccacccugggca	0	0	0	0	0	0	0	2	0	0	0	0	0	0	0	0	0.223936	0
15	conserve-cli-miR-12215-3p	ugcccacacgugcugccgaggguguuggcgugugccacacgccugccccgcggcggugccggcggc	ugcccacacgugcugccgaggguguuggcgugugccacacgccugccccgcggcggugccggcggc	ugcccacacgugcugccgaggguguuggcgugugccacacgccugccccgcggcggugccggcggc	ugcccacacgugcugccgaggguguuggcgugugccacacgccugccccgcggcggugccggcggc	ugcccacacgugcugccgaggguguuggcgugugccacacgccugccccgcggcggugccggcggc	ugcccacacgugcugccgaggguguuggcgugugccacacgccugccccgcggcggugccggcggc	cccggggccccggcggcggcucaccucgccccuccgccccccgggc	ugcccacacgugcugccgaggguguuggcgugugccacacgccugccccgcggcggugccggcggc	ugcccacacgugcugccgaggguguuggcgugugccacacgccugccccgcggcggugccggcggc	cgcggcggugccggcggc	cgcggcggugccggcggc	cgcggcggugccggcggc	cgcggcggugccggcggc	cgcggcggugccggcggc	cgcggcggugccggcggc	gccccuccgccccccgggc	cgcggcggugccggcggc	cgcggcggugccggcggc	4	3	0	0	0	0	11	0	0	0.485565	0.379893	0	0	0	0	1.16141	0	0
16	conserve-cli-miR-12215-5p	ugcccacacgugcugccgaggguguuggcgugugccacacgccugccccgcggcggugccggcggc	ugcccacacgugcugccgaggguguuggcgugugccacacgccugccccgcggcggugccggcggc	ugcccacacgugcugccgaggguguuggcgugugccacacgccugccccgcggcggugccggcggc	ugcccacacgugcugccgaggguguuggcgugugccacacgccugccccgcggcggugccggcggc	ugcccacacgugcugccgaggguguuggcgugugccacacgccugccccgcggcggugccggcggc	ugcccacacgugcugccgaggguguuggcgugugccacacgccugccccgcggcggugccggcggc	cccggggccccggcggcggcucaccucgccccuccgccccccgggc	ugcccacacgugcugccgaggguguuggcgugugccacacgccugccccgcggcggugccggcggc	ugcccacacgugcugccgaggguguuggcgugugccacacgccugccccgcggcggugccggcggc	ugcccacacgugcugccgaggg	ugcccacacgugcugccgaggg	ugcccacacgugcugccgaggg	ugcccacacgugcugccgaggg	ugcccacacgugcugccgaggg	ugcccacacgugcugccgaggg	cccggggccccggcggc	ugcccacacgugcugccgaggg	ugcccacacgugcugccgaggg	0	0	0	0	0	0	1	0	0	0	0	0	0	0	0	0.105583	0	0
17	conserve-cli-miR-12218-2-3p	cacugcagugcuguccacgccgucacugcagugcuguccacgccgucacugcagugcuguccaugccgucacugcagugcu	ugggcacagccgagcuuggaggcaguggcaauuucuuuucgucuccauccucacugugcugugu	ugggcacagccgagcuuggaggcaguggcaauuucuuuucgucuccauccucacugugcugugu	ugggcacagccgagcuuggaggcaguggcaauuucuuuucgucuccauccucacugugcugugu	ugggcacagccgagcuuggaggcaguggcaauuucuuuucgucuccauccucacugugcugugu	ugggcacagccgagcuuggaggcaguggcaauuucuuuucgucuccauccucacugugcugugu	ugggcacagccgagcuuggaggcaguggcaauuucuuuucgucuccauccucacugugcugugu	ugggcacagccgagcuuggaggcaguggcaauuucuuuucgucuccauccucacugugcugugu	ugggcacagccgagcuuggaggcaguggcaauuucuuuucgucuccauccucacugugcugugu	uccaugccgucacugcagugcu	cuccauccucacugugcugugu	cuccauccucacugugcugugu	cuccauccucacugugcugugu	cuccauccucacugugcugugu	cuccauccucacugugcugugu	cuccauccucacugugcugugu	cuccauccucacugugcugugu	cuccauccucacugugcugugu	8	0	0	0	0	0	0	0	0	0.971131	0	0	0	0	0	0	0	0
18	conserve-cli-miR-12250-3p	cgugcucugaauauccguuccuccagaguuagacugccaaggaaaagguauucagagcaugcc	ggauacucacagcaucuggcucagugagauacuguaguucugacuuagaugcucugaauaucccu	ggauacucacagcaucuggcucagugagauacuguaguucugacuuagaugcucugaauaucccu	cgugcucugaauauccguuccuccagaguuagacugccaaggaaaagguauucagagcaugcc	aggauacucacagcaucuggcucagugagauacuguaguucugacuuagaugcucugaauaucccu	ugcucugaauauccguuccuccagaguuagacugccaaggaaaagguauucagagcaugcc	cgugcucugaauauccguuccuccagaguuagacugccaaggaaaagguauucagagcaugcc	cgugcucugaauauccguuccuccagaguuagacugccaaggaaaagguauucagagcaugcc	ugcucugaauauccguuccuccagaguuagacugccaaggaaaagguauucagagcaugccu	gaaaagguauucagagcaugcc	cuuagaugcucugaauaucccu	cuuagaugcucugaauaucccu	gaaaagguauucagagcaugcc	cuuagaugcucugaauaucccu	aaaagguauucagagcaugcc	gaaaagguauucagagcaugcc	gaaaagguauucagagcaugcc	aaaagguauucagagcaugccu	0	35	10	0	12	2	0	0	1	0	4.43208	1.01408	0	1.43616	0.228321	0	0	0.0901089
19	conserve-cli-miR-12250-5p	cgugcucugaauauccguuccuccagaguuagacugccaaggaaaagguauucagagcaugcc	ggauacucacagcaucuggcucagugagauacuguaguucugacuuagaugcucugaauaucccu	ggauacucacagcaucuggcucagugagauacuguaguucugacuuagaugcucugaauaucccu	cgugcucugaauauccguuccuccagaguuagacugccaaggaaaagguauucagagcaugcc	aggauacucacagcaucuggcucagugagauacuguaguucugacuuagaugcucugaauaucccu	ugcucugaauauccguuccuccagaguuagacugccaaggaaaagguauucagagcaugcc	cgugcucugaauauccguuccuccagaguuagacugccaaggaaaagguauucagagcaugcc	cgugcucugaauauccguuccuccagaguuagacugccaaggaaaagguauucagagcaugcc	ugcucugaauauccguuccuccagaguuagacugccaaggaaaagguauucagagcaugccu	cgugcucugaauauccguuccu	ggauacucacagcaucuggcuc	ggauacucacagcaucuggcuc	cgugcucugaauauccguuccu	aggauacucacagcaucuggcuca	ugcucugaauauccguuccucc	cgugcucugaauauccguuccu	cgugcucugaauauccguuccu	ugcucugaauauccguuccucc	3	0	0	0	1	1	0	0	4	0.364174	0	0	0	0.11968	0.114161	0	0	0.360436
20	conserve-cli-miR-12255-3p	ucggagguccaugcugucaacaugcagaccuacaagcuguggcaccuggaccccgaca	ucggagguccaugcugucaacaugcagaccuacaagcuguggcaccuggaccccgaca	ucggagguccaugcugucaacaugcagaccuacaagcuguggcaccuggaccccgaca	ucggagguccaugcugucaacaugcagaccuacaagcuguggcaccuggaccccgaca	ucggagguccaugcugucaacaugcagaccuacaagcuguggcaccuggaccccgaca	ucggagguccaugcugucaacaugcagaccuacaagcuguggcaccuggaccccgaca	ucggagguccaugcugucaacaugcagaccuacaagcuguggcaccuggaccccgaca	ucggagguccaugcugucaacaugcagaccuacaagcuguggcaccuggaccccgaca	ucggagguccaugcugucaacaugcagaccuacaagcuguggcaccuggaccccgaca	uguggcaccuggaccccgaca	uguggcaccuggaccccgaca	uguggcaccuggaccccgaca	uguggcaccuggaccccgaca	uguggcaccuggaccccgaca	uguggcaccuggaccccgaca	uguggcaccuggaccccgaca	uguggcaccuggaccccgaca	uguggcaccuggaccccgaca	86	66	34	13	12	0	6	0	0	10.4397	8.35764	3.44786	1.56592	1.43616	0	0.633497	0	0
21	conserve-cli-miR-12255-5p	ucggagguccaugcugucaacaugcagaccuacaagcuguggcaccuggaccccgaca	ucggagguccaugcugucaacaugcagaccuacaagcuguggcaccuggaccccgaca	ucggagguccaugcugucaacaugcagaccuacaagcuguggcaccuggaccccgaca	ucggagguccaugcugucaacaugcagaccuacaagcuguggcaccuggaccccgaca	ucggagguccaugcugucaacaugcagaccuacaagcuguggcaccuggaccccgaca	ucggagguccaugcugucaacaugcagaccuacaagcuguggcaccuggaccccgaca	ucggagguccaugcugucaacaugcagaccuacaagcuguggcaccuggaccccgaca	ucggagguccaugcugucaacaugcagaccuacaagcuguggcaccuggaccccgaca	ucggagguccaugcugucaacaugcagaccuacaagcuguggcaccuggaccccgaca	ucggagguccaugcugucaacaugc	ucggagguccaugcugucaacau	ucggagguccaugcugucaacaug	ucggagguccaugcugucaacau	ucggagguccaugcugucaacaug	ucggagguccaugcugucaacaugc	ucggagguccaugcugucaacau	ucggagguccaugcugucaacaugc	ucggagguccaugcugucaacaugc	3	4	3	2	2	0	1	0	0	0.364174	0.506524	0.304223	0.240911	0.23936	0	0.105583	0	0
22	conserve-cli-miR-1227-3p	uguggccguuggggccccauuggcuguggcuguugggcccugcuggcuguggcgguuggggccccauuggcuguggc	uguggccguuggggccccguuggcuguggcaguucaugccccguuggcuguggccauuggggccccauuggcuguggc	uguggccguuggggccccguuggcuguggcaguucaugccccguuggcuguggccauuggggccccauuggcuguggc	uguggccguuggggccccguuggcuguggcaguucaugccccguuggcuguggccauuggggccccauuggcuguggc	uguggccguuggggccccguuggcuguggcaguucaugccccguuggcuguggccauuggggccccauuggcuguggc	uguggccguuggggccccguuggcuguggcaguucaugccccguuggcuguggccauuggggccccauuggcuguggc	uguggccguuggggccccguuggcuguggcaguucaugccccguuggcuguggccauuggggccccauuggcuguggc	uguggccguuggggccccguuggcuguggcaguucaugccccguuggcuguggccauuggggccccauuggcuguggc	uguggccguuggggccccguuggcuguggcaguucaugccccguuggcuguggccauuggggccccauuggcuguggc	uuggggccccauuggcuguggc	uuggggccccauuggcuguggc	uuggggccccauuggcuguggc	uuggggccccauuggcuguggc	uuggggccccauuggcuguggc	uuggggccccauuggcuguggc	uuggggccccauuggcuguggc	uuggggccccauuggcuguggc	uuggggccccauuggcuguggc	3	0	0	0	0	0	0	0	0	0.364174	0	0	0	0	0	0	0	0
23	conserve-cli-miR-12283-3p	auaaguacucaaaggagaacacugauacuuaaaccaguucuucucugagauguacugucu	auaaguacucaaaggagaacacugauacuuaaaccaguucuucucugagauguacugucu	auaaguacucaaaggagaacacugauacuuaaaccaguucuucucugagauguacugucu	auaaguacucaaaggagaacacugauacuuaaaccaguucuucucugagauguacugucu	auaaguacucaaaggagaacacugauacuuaaaccaguucuucucugagauguacugucu	auaaguacucaaaggagaacacugauacuuaaaccaguucuucucugagauguacugucu	auaaguacucaaaggagaacacugauacuuaaaccaguucuucucugagauguacugucu	auaaguacucaaaggagaacacugauacuuaaaccaguucuucucugagauguacugucu	auaaguacucaaaggagaacacugauacuuaaaccaguucuucucugagauguacugucu	ucuucucugagauguacugucu	ucuucucugagauguacugucu	ucuucucugagauguacugucu	ucuucucugagauguacugucu	ucuucucugagauguacugucu	ucuucucugagauguacugucu	ucuucucugagauguacugucu	ucuucucugagauguacugucu	ucuucucugagauguacugucu	3	0	0	0	0	0	0	0	0	0.364174	0	0	0	0	0	0	0	0
24	conserve-cli-miR-12292-5p	guggggucucuggcagcugccaggagcugcucuccucacuggcagcaccacaggcucccug	guggggucucuggcagcugccaggagcugcucuccucacuggcagcaccacaggcucccug	guggggucucuggcagcugccaggagcugcucuccucacuggcagcaccacaggcucccug	guggggucucuggcagcugccaggagcugcucuccucacuggcagcaccacaggcucccug	guggggucucuggcagcugccaggagcugcucuccucacuggcagcaccacaggcucccug	guggggucucuggcagcugccaggagcugcucuccucacuggcagcaccacaggcucccug	guggggucucuggcagcugccaggagcugcucuccucacuggcagcaccacaggcucccug	guggggucucuggcagcugccaggagcugcucuccucacuggcagcaccacaggcucccug	guggggucucuggcagcugccaggagcugcucuccucacuggcagcaccacaggcucccug	guggggucucuggcagcugcca	guggggucucuggcagcugcca	guggggucucuggcagcugcca	guggggucucuggcagcugcca	guggggucucuggcagcugcca	guggggucucuggcagcugcca	guggggucucuggcagcugcca	guggggucucuggcagcugcca	guggggucucuggcagcugcca	3	5	0	0	0	0	0	3	0	0.364174	0.633155	0	0	0	0	0	0.335904	0
25	conserve-cli-miR-12293-2-3p	agccucuuuugacugcagacugagaaggagcucagggcaccaguuugcaguaaaaggggucac	agccucuuuugacugcagacugagaaggagcucagggcaccaguuugcaguaaaaggggucacu	agccucuuuugacugcagacugagaaggagcucagggcaccaguuugcaguaaaaggggucac	agccucuuuugacugcagacugagaaggagcucagggcaccaguuugcaguaaaaggggucac	agccucuuuugacugcagacugagaaggagcucagggcaccaguuugcaguaaaaggggucac	agccucuuuugacugcagacugagaaggagcucagggcaccaguuugcaguaaaaggggucac	agccucuuuugacugcagacugagaaggagcucagggcaccaguuugcaguaaaaggggucac	agccucuuuugacugcagacugagaaggagcucagggcaccaguuugcaguaaaaggggucac	agccucuuuugacugcagacugagaaggagcucagggcaccaguuugcaguaaaaggggucac	aguuugcaguaaaaggggucac	guuugcaguaaaaggggucacu	guuugcaguaaaaggggucac	uuugcaguaaaaggggucac	aguuugcaguaaaaggggucac	aguuugcaguaaaaggggucac	uuugcaguaaaaggggucac	uuugcaguaaaaggggucac	uuugcaguaaaaggggucac	2	1	1	0	0	1	0	0	0	0.242783	0.126631	0.101408	0	0	0.114161	0	0	0
26	conserve-cli-miR-12293-2-5p	agccucuuuugacugcagacugagaaggagcucagggcaccaguuugcaguaaaaggggucac	agccucuuuugacugcagacugagaaggagcucagggcaccaguuugcaguaaaaggggucacu	agccucuuuugacugcagacugagaaggagcucagggcaccaguuugcaguaaaaggggucac	agccucuuuugacugcagacugagaaggagcucagggcaccaguuugcaguaaaaggggucac	agccucuuuugacugcagacugagaaggagcucagggcaccaguuugcaguaaaaggggucac	agccucuuuugacugcagacugagaaggagcucagggcaccaguuugcaguaaaaggggucac	agccucuuuugacugcagacugagaaggagcucagggcaccaguuugcaguaaaaggggucac	agccucuuuugacugcagacugagaaggagcucagggcaccaguuugcaguaaaaggggucac	agccucuuuugacugcagacugagaaggagcucagggcaccaguuugcaguaaaaggggucac	agccucuuuugacugcagacu	agccucuuuugacugcagacu	agccucuuuugacugcagacuga	agccucuuuugacugcagacu	agccucuuuugacugcagacuga	agccucuuuugacugcagacu	agccucuuuugacugcagacu	agccucuuuugacugcagacu	agccucuuuugacugcagacu	61	263	236	731	162	866	1389	298	221	7.40487	33.3039	23.9322	88.0529	19.3882	98.863	146.655	33.3665	19.9141
27	conserve-cli-miR-12331-3p	uaagaggagcgggaggguggaggaaggugccucgugccccaccaucuuccuccucucuccagu	uaagaggagcgggaggguggaggaaggugccucgugccccaccaucuuccuccucucuccagu	uaagaggagcgggaggguggaggaaggugccucgugccccaccaucuuccuccucucuccagu	uaagaggagcgggaggguggaggaaggugccucgugccccaccaucuuccuccucucuccagu	ugcagagacagaggguguugcaauaaagcgauugcaucuccccaucgcucucugcagg	uaagaggagcgggaggguggaggaaggugccucgugccccaccaucuuccuccucucuccagu	uaagaggagcgggaggguggaggaaggugccucgugccccaccaucuuccuccucucuccagu	uaagaggagcgggaggguggaggaaggugccucgugccccaccaucuuccuccucucuccagu	uaagaggagcgggaggguggaggaaggugccucgugccccaccaucuuccuccucucuccagu	caucuuccuccucucuccagu	caucuuccuccucucuccagu	caucuuccuccucucuccagu	caucuuccuccucucuccagu	caucuccccaucgcucucugcagg	caucuuccuccucucuccagu	caucuuccuccucucuccagu	caucuuccuccucucuccagu	caucuuccuccucucuccagu	0	0	0	0	16	0	0	0	0	0	0	0	0	1.91488	0	0	0	0
28	conserve-cli-miR-12331-5p	uaagaggagcgggaggguggaggaaggugccucgugccccaccaucuuccuccucucuccagu	uaagaggagcgggaggguggaggaaggugccucgugccccaccaucuuccuccucucuccagu	uaagaggagcgggaggguggaggaaggugccucgugccccaccaucuuccuccucucuccagu	uaagaggagcgggaggguggaggaaggugccucgugccccaccaucuuccuccucucuccagu	ugcagagacagaggguguugcaauaaagcgauugcaucuccccaucgcucucugcagg	uaagaggagcgggaggguggaggaaggugccucgugccccaccaucuuccuccucucuccagu	uaagaggagcgggaggguggaggaaggugccucgugccccaccaucuuccuccucucuccagu	uaagaggagcgggaggguggaggaaggugccucgugccccaccaucuuccuccucucuccagu	uaagaggagcgggaggguggaggaaggugccucgugccccaccaucuuccuccucucuccagu	uaagaggagcgggagggugga	uaagaggagcgggagggugga	uaagaggagcgggagggugga	uaagaggagcgggagggugga	ugcagagacagaggguguugc	uaagaggagcgggagggugga	uaagaggagcgggagggugga	uaagaggagcgggagggugga	uaagaggagcgggagggugga	0	0	0	0	3	0	0	0	0	0	0	0	0	0.35904	0	0	0	0
29	conserve-cli-miR-12388-3p	ugaguuuugcugcuggggugaccuccugccuggucaucuggacagcaagccucagu	ugaguuuugcugcuggggugaccuccugccuggucaucuggacagcaagccucagu	ugaguuuugcugcuggggugaccuccugccuggucaucuggacagcaagccucagu	ugaguuuugcugcuggggugaccuccugccuggucaucuggacagcaagccucagu	ugaguuuugcugcuggggugaccuccugccuggucaucuggacagcaagccucagu	ugaguuuugcugcuggggugaccuccugccuggucaucuggacagcaagccucagu	ugaguuuugcugcuggggugaccuccugccuggucaucuggacagcaagccucagu	ugaguuuugcugcuggggugaccuccugccuggucaucuggacagcaagccucagu	ugaguuuugcugcuggggugaccuccugccuggucaucuggacagcaagccucagu	ucaucuggacagcaagccucagu	ucaucuggacagcaagccucagu	ucaucuggacagcaagccucagu	ucaucuggacagcaagccucagu	ucaucuggacagcaagccucagu	ucaucuggacagcaagccucagu	ucaucuggacagcaagccucagu	ucaucuggacagcaagccucagu	ucaucuggacagcaagccucagu	2	7	12	0	0	2	0	0	0	0.242783	0.886416	1.21689	0	0	0.228321	0	0	0
30	conserve-cli-miR-1253-3p	cugucagcauauuuucuaccaagcuccuguucucuuggguggaucggagaagaugcuggcaaga	cugucagcauauuuucuaccaagcuccuguucucuuggguggaucggagaagaugcuggcaaga	cugugcuugcgucuccagcacaaggagaagaugcugcaggauc	cugugcuugcgucuccagcacaaggagaagaugcugcaggauc	cugugcuugcgucuccagcacaaggagaagaugcugcaggauc	cugugcuugcgucuccagcacaaggagaagaugcugcaggauc	cugugcuugcgucuccagcacaaggagaagaugcugcaggauc	cugugcuugcgucuccagcacaaggagaagaugcugcaggauc	cugugcuugcgucuccagcacaaggagaagaugcugcaggauc	aucggagaagaugcuggcaaga	aucggagaagaugcuggcaaga	ggagaagaugcugcaggauc	ggagaagaugcugcaggauc	ggagaagaugcugcaggauc	ggagaagaugcugcaggauc	ggagaagaugcugcaggauc	ggagaagaugcugcaggauc	ggagaagaugcugcaggauc	3	2	0	0	0	0	0	0	0	0.364174	0.253262	0	0	0	0	0	0	0
31	conserve-cli-miR-125b-5p	acaagucaggaaaugcaaagucgagacugacacucccuucuuaacuuugcguuuccuggcuuuugu	acaagucaggaaaugcaaagucgagacugacacucccuucuuaacuuugcguuuccuggcuuuugu	acaagucaggaaaugcaaagucgagacugacacucccuucuuaacuuugcguuuccuggcuuuu	acaagucaggaaaugcaaagucgagacugacacucccuucuuaacuuugcguuuccuggcuuuu	acaagucaggaaaugcaaagucgagacugacacucccuucuuaacuuugcguuuccuggcuuuug	acaagucaggaaaugcaaagucgagacugacacucccuucuuaacuuugcguuuccuggcuuuu	acaagucaggaaaugcaaagucgagacugacacucccuucuuaacuuugcguuuccuggcuuuu	acaagucaggaaaugcaaagucgagacugacacucccuucuuaacuuugcguuuccuggcuuuu	acaagucaggaaaugcaaagucgagacugacacucccuucuuaacuuugcguuuccuggcuuuu	acaagucaggaaaugcaaaguc	acaagucaggaaaugcaaaguc	acaagucaggaaaugcaaaguc	acaagucaggaaaugcaaaguc	acaagucaggaaaugcaaaguc	acaagucaggaaaugcaaaguc	acaagucaggaaaugcaaaguc	acaagucaggaaaugcaaaguc	acaagucaggaaaugcaaaguc	16	6	0	0	11	0	0	0	0	1.94226	0.759785	0	0	1.31648	0	0	0	0
32	conserve-cli-miR-1284-3p	gcagcgugccgggcugggacaggugcucugauguuccucuccugccagugugcgcugcug	ucugcacagucgugcugcugcguuaggcuguaacguggcgcagaugugcagguacu	ucugcacagucgugcugcugcguuaggcuguaacguggcgcagaugugcagguacu	ucugcacagucgugcugcugcguuaggcuguaacguggcgcagaugugcagguacu	ucugcacagucgugcugcugcguuaggcuguaacguggcgcagaugugcagguacu	ucugcacagucgugcugcugcguuaggcuguaacguggcgcagaugugcagguacu	ucugcacagucgugcugcugcguuaggcuguaacguggcgcagaugugcagguacu	ucugcacagucgugcugcugcguuaggcuguaacguggcgcagaugugcagguacu	ucugcacagucgugcugcugcguuaggcuguaacguggcgcagaugugcagguacu	ucuccugccagugugcgcugcug	cguggcgcagaugugcagguacu	cguggcgcagaugugcagguacu	cguggcgcagaugugcagguacu	cguggcgcagaugugcagguacu	cguggcgcagaugugcagguacu	cguggcgcagaugugcagguacu	cguggcgcagaugugcagguacu	cguggcgcagaugugcagguacu	6	0	0	0	0	0	0	0	0	0.728348	0	0	0	0	0	0	0	0
33	conserve-cli-miR-1297-5p	uuucauguugaguugccauugugguuaugggagauguaaucuagcugggaaacucaaucaguguugga	uuucauguugaguugccauugugguuaugggagauguaaucuagcugggaaacucaaucaguguugga	uuucauguugaguugccauugugguuaugggagauguaaucuagcugggaaacucaaucaguguugga	uuucauguugaguugccauugugguuaugggagauguaaucuagcugggaaacucaaucaguguugga	uuucauguugaguugccauugugguuaugggagauguaaucuagcugggaaacucaaucaguguugga	uuucauguugaguugccauugugguuaugggagauguaaucuagcugggaaacucaaucaguguugga	uuucauguugaguugccauugugguuaugggagauguaaucuagcugggaaacucaaucaguguugga	uuucauguugaguugccauugugguuaugggagauguaaucuagcugggaaacucaaucaguguugga	uuucauguugaguugccauugugguuaugggagauguaaucuagcugggaaacucaaucaguguugga	uuucauguugaguugcca	uuucauguugaguugcca	uuucauguugaguugcca	uuucauguugaguugcca	uuucauguugaguugcca	uuucauguugaguugcca	uuucauguugaguugcca	uuucauguugaguugcca	uuucauguugaguugcca	0	0	6	0	0	0	0	0	0	0	0	0.608446	0	0	0	0	0	0
34	conserve-cli-miR-1344-1-3p	uggcugaguucuguagccccuuaugguaaucauuaagaugcugcauugaacucagccuuu	uggcugaguucuguagccccuuaugguaaucauuaagaugcugcauugaacucagccuuu	uggcugaguucuguagccccuuaugguaaucauuaagaugcugcauugaacucagccuuu	uggcugaguucuguagccccuuaugguaaucauuaagaugcugcauugaacucagccuuu	uggcugaguucuguagccccuuaugguaaucauuaagaugcugcauugaacucagccuuu	uggcugaguucuguagccccuuaugguaaucauuaagaugcugcauugaacucagccuuu	uggcugaguucuguagccccuuaugguaaucauuaagaugcugcauugaacucagccuuu	uggcugaguucuguagccccuuaugguaaucauuaagaugcugcauugaacucagccuuu	uggcugaguucuguagccccuuaugguaaucauuaagaugcugcauugaacucagccuuu	agaugcugcauugaacucagccuuu	agaugcugcauugaacucagccuuu	agaugcugcauugaacucagccuuu	agaugcugcauugaacucagccuuu	agaugcugcauugaacucagccuuu	agaugcugcauugaacucagccuuu	agaugcugcauugaacucagccuuu	gaugcugcauugaacucagccuuu	agaugcugcauugaacucagccuuu	2	0	0	0	16	4	19	22	0	0.242783	0	0	0	1.91488	0.456642	2.00607	2.4633	0
35	conserve-cli-miR-1379-5p	cacgggcuucaggaaguuccugguccacaacgucaaggagcuggaggugcucaugaugagcaacaggugaguccgcggggcucuggg	cacgggcuucaggaaguuccugguccacaacgucaaggagcuggaggugcucaugaugagcaacaggugaguccgcggggcucuggg	cacgggcuucaggaaguuccugguccacaacgucaaggagcuggaggugcucaugaugagcaacaggugaguccgcggggcucuggg	cacgggcuucaggaaguuccugguccacaacgucaaggagcuggaggugcucaugaugagcaacaggugaguccgcggggcucuggg	cacgggcuucaggaaguuccugguccacaacgucaaggagcuggaggugcucaugaugagcaacaggugaguccgcggggcucuggg	cacgggcuucaggaaguuccugguccacaacgucaaggagcuggaggugcucaugaugagcaacaggugaguccgcggggcucuggg	cacgggcuucaggaaguuccugguccacaacgucaaggagcuggaggugcucaugaugagcaacaggugaguccgcggggcucuggg	cacgggcuucaggaaguuccugguccacaacgucaaggagcuggaggugcucaugaugagcaacaggugaguccgcggggcucuggg	cacgggcuucaggaaguuccugguccacaacgucaaggagcuggaggugcucaugaugagcaacaggugaguccgcggggcucuggg	cacgggcuucaggaaguuccu	cacgggcuucaggaaguuccu	cacgggcuucaggaaguuccu	cacgggcuucaggaaguuccu	cacgggcuucaggaaguuccu	cacgggcuucaggaaguuccu	cacgggcuucaggaaguuccu	cacgggcuucaggaaguuccu	cacgggcuucaggaaguuccu	0	0	5	0	0	0	0	0	0	0	0	0.507038	0	0	0	0	0	0
36	conserve-cli-miR-1388b-5p	caugggcugacgaaccugagauugacccuuacauuucaccauucucagguuagacaguccucgag	caugggcugacgaaccugagauugacccuuacauuucaccauucucagguuagacaguccucgag	caugggcugacgaaccugagauugacccuuacauuucaccauucucagguuagacaguccucgag	caugggcugacgaaccugagauugacccuuacauuucaccauucucagguuagacaguccucgag	caugggcugacgaaccugagauugacccuuacauuucaccauucucagguuagacaguccucgag	caugggcugacgaaccugagauugacccuuacauuucaccauucucagguuagacaguccucgag	caugggcugacgaaccugagauugacccuuacauuucaccauucucagguuagacaguccucgag	caugggcugacgaaccugagauugacccuuacauuucaccauucucagguuagacaguccucgag	caugggcugacgaaccugagauugacccuuacauuucaccauucucagguuagacaguccucgag	caugggcugacgaaccugagauu	caugggcugacgaaccugagauu	caugggcugacgaaccugagauu	caugggcugacgaaccugaga	caugggcugacgaaccugagauu	caugggcugacgaaccugagauu	caugggcugacgaaccugagauu	caugggcugacgaaccugagauu	caugggcugacgaaccugagauu	0	0	0	2	0	0	0	0	0	0	0	0	0.240911	0	0	0	0	0
37	conserve-cli-miR-1390-3p	gguccugcaacuugcuguaggcaaugaccuccgcacuugcauacagauaguugcaggauuga	gguccugcaacuugcuguaggcaaugaccuccgcacuugcauacagauaguugcaggauuga	gguccugcaacuugcuguaggcaaugaccuccgcacuugcauacagauaguugcaggauuga	gguccugcaacuugcuguaggcaaugaccuccgcacuugcauacagauaguugcaggauuga	gguccugcaacuugcuguaggcaaugaccuccgcacuugcauacagauaguugcaggauuga	gguccugcaacuugcuguaggcaaugaccuccgcacuugcauacagauaguugcaggauuga	gguccugcaacuugcuguaggcaaugaccuccgcacuugcauacagauaguugcaggauuga	gguccugcaacuugcuguaggcaaugaccuccgcacuugcauacagauaguugcaggauuga	gguccugcaacuugcuguaggcaaugaccuccgcacuugcauacagauaguugcaggauuga	cauacagauaguugcaggauuga	cauacagauaguugcaggauuga	cauacagauaguugcaggauuga	cauacagauaguugcaggauuga	cauacagauaguugcaggauuga	cauacagauaguugcaggauuga	cauacagauaguugcaggauuga	cauacagauaguugcaggauuga	cauacagauaguugcaggauuga	0	0	0	0	0	0	0	0	4	0	0	0	0	0	0	0	0	0.360436
38	conserve-cli-miR-1420d-3p	ggaagaagccggagaaaugcaucugcuauccacagcugcaaauguccucucuggccccucuagccc	ggaagaagccggagaaaugcaucugcuauccacagcugcaaauguccucucuggccccucuagccc	ggaagaagccggagaaaugcaucugcuauccacagcugcaaauguccucucuggccccucuagccc	ggaagaagccggagaaaugcaucugcuauccacagcugcaaauguccucucuggccccucuagccc	cccugugccuucagcccaaggggucugagggacagucugcu	ggaagaagccggagaaaugcaucugcuauccacagcugcaaauguccucucuggccccucuagccc	ggaagaagccggagaaaugcaucugcuauccacagcugcaaauguccucucuggccccucuagccc	ggaagaagccggagaaaugcaucugcuauccacagcugcaaauguccucucuggccccucuagccc	ggaagaagccggagaaaugcaucugcuauccacagcugcaaauguccucucuggccccucuagccc	cucuggccccucuagccc	cucuggccccucuagccc	cucuggccccucuagccc	cucuggccccucuagccc	ucugagggacagucugcu	cucuggccccucuagccc	cucuggccccucuagccc	cucuggccccucuagccc	cucuggccccucuagccc	0	0	0	0	2	0	0	0	0	0	0	0	0	0.23936	0	0	0	0
39	conserve-cli-miR-143-3p	uuugccuugaacucucucuuucugaaaagagaugaaaaucuaaggucugagu	uuugccuugaacucucucuuucugaaaagagaugaaaaucuaaggucugagu	uuugccuugaacucucucuuucugaaaagagaugaaaaucuaaggucugagu	uuugccuugaacucucucuuucugaaaagagaugaaaaucuaaggucugagu	uuugccuugaacucucucuuucugaaaagagaugaaaaucuaaggucugagu	uuugccuugaacucucucuuucugaaaagagaugaaaaucuaaggucugagu	uuugccuugaacucucucuuucugaaaagagaugaaaaucuaaggucugagu	uuugccuugaacucucucuuucugaaaagagaugaaaaucuaaggucugagu	uuugccuugaacucucucuuucugaaaagagaugaaaaucuaaggucugagu	agagaugaaaaucuaaggucugagu	agagaugaaaaucuaaggucugagu	agagaugaaaaucuaaggucugagu	agagaugaaaaucuaaggucugagu	agagaugaaaaucuaaggucugagu	agagaugaaaaucuaaggucugagu	agagaugaaaaucuaaggucugagu	agagaugaaaaucuaaggucugagu	agagaugaaaaucuaaggucugagu	0	0	92	9	0	0	0	0	0	0	0	9.3295	1.0841	0	0	0	0	0
40	conserve-cli-miR-1453-3p	agggcagcgccgggcugcggccaagccggggacggcgcugaaccaucc	agggcagcgccgggcugcggccaagccggggacggcgcugaaccaucc	agcucuggcugagcaguccugaggaguuuacucugagcccaggcugcucagcuggggcugc	agggcagcgccgggcugcggccaagccggggacggcgcugaaccaucc	agggcagcgccgggcugcggccaagccggggacggcgcugaaccaucc	agggcagcgccgggcugcggccaagccggggacggcgcugaaccaucc	agggcagcgccgggcugcggccaagccggggacggcgcugaaccaucc	agggcagcgccgggcugcggccaagccggggacggcgcugaaccaucc	agggcagcgccgggcugcggccaagccggggacggcgcugaaccaucc	ggacggcgcugaaccaucc	ggacggcgcugaaccaucc	caggcugcucagcuggggcugc	ggacggcgcugaaccaucc	ggacggcgcugaaccaucc	ggacggcgcugaaccaucc	ggacggcgcugaaccaucc	ggacggcgcugaaccaucc	ggacggcgcugaaccaucc	0	0	4	0	0	0	0	0	0	0	0	0.40563	0	0	0	0	0	0
41	conserve-cli-miR-1453-5p	agggcagcgccgggcugcggccaagccggggacggcgcugaaccaucc	agggcagcgccgggcugcggccaagccggggacggcgcugaaccaucc	agcucuggcugagcaguccugaggaguuuacucugagcccaggcugcucagcuggggcugc	agggcagcgccgggcugcggccaagccggggacggcgcugaaccaucc	agggcagcgccgggcugcggccaagccggggacggcgcugaaccaucc	agggcagcgccgggcugcggccaagccggggacggcgcugaaccaucc	agggcagcgccgggcugcggccaagccggggacggcgcugaaccaucc	agggcagcgccgggcugcggccaagccggggacggcgcugaaccaucc	agggcagcgccgggcugcggccaagccggggacggcgcugaaccaucc	agggcagcgccgggcugc	agggcagcgccgggcugc	agcucuggcugagcaguccugagga	agggcagcgccgggcugc	agggcagcgccgggcugc	agggcagcgccgggcugc	agggcagcgccgggcugc	agggcagcgccgggcugc	agggcagcgccgggcugc	2	0	1	0	0	0	0	0	0	0.242783	0	0.101408	0	0	0	0	0	0
42	conserve-cli-miR-145-5p	uuuccugggguguuggcguugcucaugguucuuucagugaggccgacaucccagggaagg	uuuccugggguguuggcguugcucaugguucuuucagugaggccgacaucccagggaagg	uuuccugggguguuggcguugcucaugguucuuucagugaggccgacaucccagggaag	uuuccugggguguuggcguugcucaugguucuuucagugaggccgacaucccagggaagg	uuuccugggguguuggcguugcucaugguucuuucagugaggccgacaucccagggaagg	uuuccugggguguuggcguugcucaugguucuuucagugaggccgacaucccagggaagg	uuuccugggguguuggcguugcucaugguucuuucagugaggccgacaucccagggaagg	uuuccugggguguuggcguugcucaugguucuuucagugaggccgacaucccagggaagg	uuuccugggguguuggcguugcucaugguucuuucagugaggccgacaucccagggaagg	uuuccugggguguuggcguugcuca	uuuccugggguguuggcguugcuca	uuuccugggguguuggcguugc	uuuccugggguguuggcguugcuca	uuuccugggguguuggcguugcuca	uuuccugggguguuggcguugc	uuuccugggguguuggcguugcuca	uuuccugggguguuggcguugcuca	uuuccugggguguuggcguugcuca	0	0	4	0	0	3	0	0	0	0	0	0.40563	0	0	0.342482	0	0	0
43	conserve-cli-miR-1456-3p	acuggugaccagggucacuuguacgcaaugcagaagacaaaggacucuggcuaucgugc	acuggugaccagggucacuuguacgcaaugcagaagacaaaggacucuggcuaucgugc	acuggugaccagggucacuuguacgcaaugcagaagacaaaggacucuggcuaucgugc	acuggugaccagggucacuuguacgcaaugcagaagacaaaggacucuggcuaucgugc	acuggugaccagggucacuuguacgcaaugcagaagacaaaggacucuggcuaucgugc	acuggugaccagggucacuuguacgcaaugcagaagacaaaggacucuggcuaucgugc	acuggugaccagggucacuuguacgcaaugcagaagacaaaggacucuggcuaucgugc	acuggugaccagggucacuuguacgcaaugcagaagacaaaggacucuggcuaucgugc	acuggugaccagggucacuuguacgcaaugcagaagacaaaggacucuggcuaucgugc	caaaggacucuggcuaucgugc	caaaggacucuggcuaucgugc	caaaggacucuggcuaucgugc	caaaggacucuggcuaucgugc	caaaggacucuggcuaucgugc	caaaggacucuggcuaucgugc	caaaggacucuggcuaucgugc	caaaggacucuggcuaucgugc	caaaggacucuggcuaucgugc	6	0	0	0	0	0	0	0	0	0.728348	0	0	0	0	0	0	0	0
44	conserve-cli-miR-146a-5p	agagaacugaauaccauggacugaacacauggaacuggaaccaguccauggaauucaguucucaga	agagaacugaauaccauggacugaacacauggaacuggaaccaguccauggaauucaguucucaga	agagaacugaauaccauggacugaacacauggaacuggaaccaguccauggaauucaguucucaga	agagaacugaauaccauggacugaacacauggaacuggaaccaguccauggaauucaguucucaga	agagaacugaauaccauggacugaacacauggaacuggaaccaguccauggaauucaguucucaga	agagaacugaauaccauggacugaacacauggaacuggaaccaguccauggaauucaguucucaga	agagaacugaauaccauggacugaacacauggaacuggaaccaguccauggaauucaguucucaga	agagaacugaauaccauggacugaacacauggaacuggaaccaguccauggaauucaguucucaga	agagaacugaauaccauggacugaacacauggaacuggaaccaguccauggaauucaguucucaga	agagaacugaauaccauggacug	agagaacugaauaccauggacu	agagaacugaauaccauggacu	agagaacugaauaccauggacu	agagaacugaauaccauggacu	agagaacugaauaccauggacu	agagaacugaauaccauggacu	agagaacugaauaccauggacu	agagaacugaauaccauggacu	719	0	0	0	0	1503	0	0	0	87.2804	0	0	0	0	171.583	0	0	0
45	conserve-cli-miR-1470-3p	ccggggccccggcggcggcucaccucgccccuccgccccccgggcc	ccggggccccggcggcggcucaccucgccccuccgccccccgggcc	ccggggccccggcggcggcucaccucgccccuccgccccccgggcc	cccuccugccgcccggggaacgggcuucagcgcccggaaaguggcgagggag	ccggggccccggcggcggcucaccucgccccuccgccccccgggcc	ccggggccccggcggcggcucaccucgccccuccgccccccgggcc	ccggggccccggcggcggcucaccucgccccuccgccccccgggcc	ccccggggccccggcggcggcucaccucgccccuccgccccccgggcc	ccccggggccccggcggcggcucaccucgccccuccgccccccgggcc	ccccuccgccccccgggcc	ccccuccgccccccgggcc	ccccuccgccccccgggcc	cggaaaguggcgagggag	ccccuccgccccccgggcc	ccccuccgccccccgggcc	ccccuccgccccccgggcc	ccccuccgccccccgggcc	ccccuccgccccccgggcc	0	0	0	2	0	0	0	20	5	0	0	0	0.240911	0	0	0	2.23936	0.450545
46	conserve-cli-miR-148a-1-3p	aaaguucuguagugcacugacugcuaucguacccagagucggagugucacagaacuuugc	aaaguucuguagugcacugacugcuaucguacccagagucggagugucacagaacuuugc	aaaguucuguagugcacugacugcuaucguacccagagucggagugucacagaacuuugc	aaaguucuguagugcacugacugcuaucguacccagagucggagugucacagaacuuugc	aaaguucuguagugcacugacugcuaucguacccagagucggagugucacagaacuuugc	aaaguucuguagugcacugacugcuaucguacccagagucggagugucacagaacuuugc	aaaguucuguagugcacugacugcuaucguacccagagucggagugucacagaacuuugc	aaaguucuguagugcacugacugcuaucguacccagagucggagugucacagaacuuugc	aaaguucuguagugcacugacugcuaucguacccagagucggagugucacagaacuuugc	ucggagugucacagaacuuugc	ucggagugucacagaacuuugc	ucggagugucacagaacuuugc	ucggagugucacagaacuuugc	ucggagugucacagaacuuugc	ucggagugucacagaacuuugc	ucggagugucacagaacuuugc	ucggagugucacagaacuuugc	ucggagugucacagaacuuugc	240	139	167	64	102	0	40	65	48	29.1339	17.6017	16.9351	7.70915	12.2074	0	4.22331	7.27792	4.32523
47	conserve-cli-miR-148a-1-5p	aaaguucuguagugcacugacugcuaucguacccagagucggagugucacagaacuuugc	aaaguucuguagugcacugacugcuaucguacccagagucggagugucacagaacuuugc	aaaguucuguagugcacugacugcuaucguacccagagucggagugucacagaacuuugc	aaaguucuguagugcacugacugcuaucguacccagagucggagugucacagaacuuugc	aaaguucuguagugcacugacugcuaucguacccagagucggagugucacagaacuuugc	aaaguucuguagugcacugacugcuaucguacccagagucggagugucacagaacuuugc	aaaguucuguagugcacugacugcuaucguacccagagucggagugucacagaacuuugc	aaaguucuguagugcacugacugcuaucguacccagagucggagugucacagaacuuugc	aaaguucuguagugcacugacugcuaucguacccagagucggagugucacagaacuuugc	aaaguucuguagugcacugacu	aaaguucuguagugcacugacu	aaaguucuguagugcacugacu	aaaguucuguagugcacugacu	aaaguucuguagugcacugacu	aaaguucuguagugcacugacu	aaaguucuguagugcacugacu	aaaguucuguagugcacugacu	aaaguucuguagugcacugacu	408	260	269	120	192	0	43	61	56	49.5277	32.924	27.2786	14.4547	22.9786	0	4.54006	6.83005	5.0461
48	conserve-cli-miR-153-5p	gcauuuuuggguugggcuuugagcgaacuggagaaggggaaugauuucagaagucugguucgcaggugagacuauggaaaugcaauuu	gcauuuuuggguugggcuuugagcgaacuggagaaggggaaugauuucagaagucugguucgcaggugagacuauggaaaugcaauuu	gcauuuuuggguugggcuuugagcgaacuggagaaggggaaugauuucagaagucugguucgcaggugagacuauggaaaugcaauuu	gcauuuuuggguugggcuuugagcgaacuggagaaggggaaugauuucagaagucugguucgcaggugagacuauggaaaugcaauuu	gcauuuuuggguugggcuuugagcgaacuggagaaggggaaugauuucagaagucugguucgcaggugagacuauggaaaugcaauuu	gcauuuuuggguugggcuuugagcgaacuggagaaggggaaugauuucagaagucugguucgcaggugagacuauggaaaugcaauuu	gcauuuuuggguugggcuuugagcgaacuggagaaggggaaugauuucagaagucugguucgcaggugagacuauggaaaugcaauuu	gcauuuuuggguugggcuuugagcgaacuggagaaggggaaugauuucagaagucugguucgcaggugagacuauggaaaugcaauuu	gcauuuuuggguugggcuuugagcgaacuggagaaggggaaugauuucagaagucugguucgcaggugagacuauggaaaugcaauuu	gcauuuuuggguugggc	gcauuuuuggguugggc	gcauuuuuggguugggc	gcauuuuuggguugggc	gcauuuuuggguugggc	gcauuuuuggguugggc	gcauuuuuggguugggc	gcauuuuuggguugggc	gcauuuuuggguugggc	0	0	0	0	4	0	0	0	0	0	0	0	0	0.47872	0	0	0	0
49	conserve-cli-miR-1545e-3p	uguguccugaccccaaaauaaaaucauaugaaaaaaaagaugggaggcagagggagagggaacagaga	uguguccugaccccaaaauaaaaucauaugaaaaaaaagaugggaggcagagggagagggaacagaga	uguguccugaccccaaaauaaaaucauaugaaaaaaaagaugggaggcagagggagagggaacagaga	uguguccugaccccaaaauaaaaucauaugaaaaaaaagaugggaggcagagggagagggaacagaga	ucugaucccuugccuguucucugcauuguccccugcagcagggacagaaggagagcagagu	uguguccugaccccaaaauaaaaucauaugaaaaaaaagaugggaggcagagggagagggaacagaga	uguguccugaccccaaaauaaaaucauaugaaaaaaaagaugggaggcagagggagagggaacagaga	uguguccugaccccaaaauaaaaucauaugaaaaaaaagaugggaggcagagggagagggaacagaga	uguguccugaccccaaaauaaaaucauaugaaaaaaaagaugggaggcagagggagagggaacagaga	agggagagggaacagaga	agggagagggaacagaga	agggagagggaacagaga	agggagagggaacagaga	agggacagaaggagagcagagu	agggagagggaacagaga	agggagagggaacagaga	agggagagggaacagaga	agggagagggaacagaga	0	0	0	0	1	0	0	0	0	0	0	0	0	0.11968	0	0	0	0
50	conserve-cli-miR-1545e-5p	uguguccugaccccaaaauaaaaucauaugaaaaaaaagaugggaggcagagggagagggaacagaga	uguguccugaccccaaaauaaaaucauaugaaaaaaaagaugggaggcagagggagagggaacagaga	uguguccugaccccaaaauaaaaucauaugaaaaaaaagaugggaggcagagggagagggaacagaga	uguguccugaccccaaaauaaaaucauaugaaaaaaaagaugggaggcagagggagagggaacagaga	ucugaucccuugccuguucucugcauuguccccugcagcagggacagaaggagagcagagu	uguguccugaccccaaaauaaaaucauaugaaaaaaaagaugggaggcagagggagagggaacagaga	uguguccugaccccaaaauaaaaucauaugaaaaaaaagaugggaggcagagggagagggaacagaga	uguguccugaccccaaaauaaaaucauaugaaaaaaaagaugggaggcagagggagagggaacagaga	uguguccugaccccaaaauaaaaucauaugaaaaaaaagaugggaggcagagggagagggaacagaga	uguguccugaccccaaa	uguguccugaccccaaa	uguguccugaccccaaa	uguguccugaccccaaa	ucugaucccuugccuguucucugc	uguguccugaccccaaa	uguguccugaccccaaa	uguguccugaccccaaa	uguguccugaccccaaa	0	0	0	0	4	0	0	0	0	0	0	0	0	0.47872	0	0	0	0
51	conserve-cli-miR-1548-3p	caguaaccccuugggggacaucacuccugcggccggugggcucccaguugguuacugcu	caguaaccccuugggggacaucacuccugcggccggugggcucccaguugguuacugcu	caguaaccccuugggggacaucacuccugcggccggugggcucccaguugguuacugcu	caguaaccccuugggggacaucacuccugcggccggugggcucccaguugguuacugcu	caguaaccccuugggggacaucacuccugcggccggugggcucccaguugguuacugcu	caguaaccccuugggggacaucacuccugcggccggugggcucccaguugguuacugcu	caguaaccccuugggggacaucacuccugcggccggugggcucccaguugguuacugcu	guaaccccuugggggacaucacuccugcggccggugggcucccaguugguuacug	caguaaccccuugggggacaucacuccugcggccggugggcucccaguugguuacugcu	ugggcucccaguugguuacugcu	ugggcucccaguugguuacugcu	ugggcucccaguugguuacugcu	ugggcucccaguugguuacugcu	ugggcucccaguugguuacugcu	ugggcucccaguugguuacugcu	ugggcucccaguugguuacugcu	ugggcucccaguugguuacug	ugggcucccaguugguuacugcu	39	34	27	6	16	8	7	3	20	4.73426	4.30545	2.73801	0.722733	1.91488	0.913284	0.73908	0.335904	1.80218
52	conserve-cli-miR-1582-5p	aaaagagaguuucguccagacccacgaguacgugccgcuuaucucgcgguguaacuguuggguuuggaagggacugugugggca	aaaagagaguuucguccagacccacgaguacgugccgcuuaucucgcgguguaacuguuggguuuggaagggacugugugggca	aaaagagaguuucguccagacccacgaguacgugccgcuuaucucgcgguguaacuguuggguuuggaagggacugugugggca	aaaagagaguuucguccagacccacgaguacgugccgcuuaucucgcgguguaacuguuggguuuggaagggacugugugggca	aaaagagaguuucguccagacccacgaguacgugccgcuuaucucgcgguguaacuguuggguuuggaagggacugugugggca	aaaagagaguuucguccagacccacgaguacgugccgcuuaucucgcgguguaacuguuggguuuggaagggacugugugggca	aaaagagaguuucguccagacccacgaguacgugccgcuuaucucgcgguguaacuguuggguuuggaagggacugugugggca	aaaagagaguuucguccagacccacgaguacgugccgcuuaucucgcgguguaacuguuggguuuggaagggacugugugggca	aaaagagaguuucguccagacccacgaguacgugccgcuuaucucgcgguguaacuguuggguuuggaagggacugugugggca	aaaagagaguuucguccagacc	aaaagagaguuucguccagacc	aaaagagaguuucguccagacc	aaaagagaguuucguccagacc	aaaagagaguuucguccagacc	aaaagagaguuucguccagacc	aaaagagaguuucguccagacc	aaaagagaguuucguccagacc	aaaagagaguuucguccagacc	0	0	0	4	0	0	0	0	0	0	0	0	0.481822	0	0	0	0	0
53	conserve-cli-miR-1584-3p	gagacaggcagagaauauucucucuccucuggauuccu	gagacaggcagagaauauucucucuccucuggauuccu	gagacaggcagagaauauucucucuccucuggauuccu	gagacaggcagagaauauucucucuccucuggauuccu	gagacaggcagagaauauucucucuccucuggauuccu	agacaggcagagaauauucucucuccucuggauucc	gagacaggcagagaauauucucucuccucuggauuccu	gagacaggcagagaauauucucucuccucuggauuccu	gagacaggcagagaauauucucucuccucuggauuccu	cucucuccucuggauuccu	cucucuccucuggauuccu	cucucuccucuggauuccu	cucucuccucuggauuccu	cucucuccucuggauuccu	ucucuccucuggauucc	cucucuccucuggauuccu	cucucuccucuggauuccu	cucucuccucuggauuccu	0	0	0	19	8	20	0	0	0	0	0	0	2.28865	0.957441	2.28321	0	0	0
54	conserve-cli-miR-1609-5p	ggcaggauggccgagcgggguggccccguggccacugugccgc	uggcugagccaccgacccccuccggugcccagggguccccagccgggggggggaggggcccagcagg	uggcugagccaccgacccccuccggugcccagggguccccagccgggggggggaggggcccagcagg	uggcugagccaccgacccccuccggugcccagggguccccagccgggggggggaggggcccagcagg	uggcugagccaccgacccccuccggugcccagggguccccagccgggggggggaggggcccagcagg	uggcugagccaccgacccccuccggugcccagggguccccagccgggggggggaggggcccagcagg	uggcugagccaccgacccccuccggugcccagggguccccagccgggggggggaggggcccagcagg	uggcugagccaccgacccccuccggugcccagggguccccagccgggggggggaggggcccagcagg	uggcugagccaccgacccccuccggugcccagggguccccagccgggggggggaggggcccagcagg	ggcaggauggccgagcgg	uggcugagccaccgaccc	uggcugagccaccgaccc	uggcugagccaccgaccc	uggcugagccaccgaccc	uggcugagccaccgaccc	uggcugagccaccgaccc	uggcugagccaccgaccc	uggcugagccaccgaccc	15	0	0	0	0	0	0	0	0	1.82087	0	0	0	0	0	0	0	0
55	conserve-cli-miR-1614-3p	ggucuugacugucuugccuuguuuugacauccuaaaucaacagggagggaggucaagaccucu	ggucuugacugucuugccuuguuuugacauccuaaaucaacagggagggaggucaagaccucu	ggucuugacugucuugccuuguuuugacauccuaaaucaacagggagggaggucaagaccucu	ggucuugacugucuugccuuguuuugacauccuaaaucaacagggagggaggucaagaccucu	uggucuugacugucuugccuuguuuugacauccuaaaucaacagggagggaggucaagaccucu	ggucuugacugucuugccuuguuuugacauccuaaaucaacagggagggaggucaagaccucu	ggucuugacugucuugccuuguuuugacauccuaaaucaacagggagggaggucaagaccucu	ggucuugacugucuugccuuguuuugacauccuaaaucaacagggagggaggucaagaccucu	ggucuugacugucuugccuuguuuugacauccuaaaucaacagggagggaggucaagaccucu	cagggagggaggucaagaccucu	cagggagggaggucaagaccucu	cagggagggaggucaagaccucu	cagggagggaggucaagaccucu	cagggagggaggucaagaccucu	cagggagggaggucaagaccucu	cagggagggaggucaagaccucu	cagggagggaggucaagaccucu	cagggagggaggucaagaccucu	0	0	0	0	2	0	0	0	0	0	0	0	0	0.23936	0	0	0	0
56	conserve-cli-miR-1631-3p	cgugcaaaccaccaguucuccuuugacgucaauuggcaacuggcugguuugcaccau	cucgugcaaaccaccaguucuccuuugacgucaauuggcaacuggcugguuugcaccau	cgugcaaaccaccaguucuccuuugacgucaauuggcaacuggcugguuugcaccau	cucgugcaaaccaccaguucuccuuugacgucaauuggcaacuggcugguuugcaccau	cucgugcaaaccaccaguucuccuuugacgucaauuggcaacuggcugguuugcaccau	cucgugcaaaccaccaguucuccuuugacgucaauuggcaacuggcugguuugcaccau	cgugcaaaccaccaguucuccuuugacgucaauuggcaacuggcugguuugcaccau	cucgugcaaaccaccaguucuccuuugacgucaauuggcaacuggcugguuugcaccau	cucgugcaaaccaccaguucuccuuugacgucaauuggcaacuggcugguuugcaccau	caacuggcugguuugcaccau	caacuggcugguuugcaccau	caacuggcugguuugcaccau	caacuggcugguuugcaccau	caacuggcugguuugcaccau	caacuggcugguuugcaccau	caacuggcugguuugcaccau	caacuggcugguuugcaccau	caacuggcugguuugcaccau	4	0	3	0	0	0	3	0	0	0.485565	0	0.304223	0	0	0	0.316748	0	0
57	conserve-cli-miR-1649-3p	gggcucuggguccugcagcaucuggguccugcagcaucuggauccugc	gggcucuggguccugcagcaucuggguccugcagcaucuggauccugc	gggcucuggguccugcagcaucuggguccugcagcaucuggauccugc	gggcucuggguccugcagcaucuggguccugcagcaucuggauccugc	gggcucuggguccugcagcaucuggguccugcagcaucuggauccugc	gggcucuggguccugcagcaucuggguccugcagcaucuggauccugc	gggcagagcagcagagcuggcugugcgaguccugcucuguucgcucugguaccug	gggcagagcagcagagcuggcugugcgaguccugcucuguucgcucugguaccug	gggcucuggguccugcagcaucuggguccugcagcaucuggauccugc	uccugcagcaucuggauccugc	uccugcagcaucuggauccugc	uccugcagcaucuggauccugc	uccugcagcaucuggauccugc	uccugcagcaucuggauccugc	uccugcagcaucuggauccugc	ugcucuguucgcucugguaccug	ugcucuguucgcucugguaccug	uccugcagcaucuggauccugc	0	0	0	0	0	0	7	4	0	0	0	0	0	0	0	0.73908	0.447872	0
58	conserve-cli-miR-1671-3p	gugaggacagcguggggacagggacacaaccaggugccguccuuguccccacggcccucaaacc	gugaggacagcguggggacagggacacaaccaggugccguccuuguccccacggcccucaaacc	gugaggacagcguggggacagggacacaaccaggugccguccuuguccccacggcccucaaacc	gugaggacagcguggggacagggacacaaccaggugccguccuuguccccacggcccucaaac	gugaggacagcguggggacagggacacaaccaggugccguccuuguccccacggcccucaaa	gugaggacagcguggggacagggacacaaccaggugccguccuuguccccacggcccucaaacc	gugaggacagcguggggacagggacacaaccaggugccguccuuguccccacggcccucaaacc	gugaggacagcguggggacagggacacaaccaggugccguccuuguccccacggcccucaaacc	gugaggacagcguggggacagggacacaaccaggugccguccuuguccccacggcccucaaaccc	cuuguccccacggcccucaaacc	cuuguccccacggcccucaaacc	cuuguccccacggcccucaaacc	cuuguccccacggcccucaaac	cuuguccccacggcccucaaa	uuguccccacggcccucaaacc	uuguccccacggcccucaaacc	cuuguccccacggcccucaaacc	uuguccccacggcccucaaaccc	0	0	0	9	1	15	7	9	8	0	0	0	1.0841	0.11968	1.71241	0.73908	1.00771	0.720871
59	conserve-cli-miR-1671-5p	gugaggacagcguggggacagggacacaaccaggugccguccuuguccccacggcccucaaacc	gugaggacagcguggggacagggacacaaccaggugccguccuuguccccacggcccucaaacc	gugaggacagcguggggacagggacacaaccaggugccguccuuguccccacggcccucaaacc	gugaggacagcguggggacagggacacaaccaggugccguccuuguccccacggcccucaaac	gugaggacagcguggggacagggacacaaccaggugccguccuuguccccacggcccucaaa	gugaggacagcguggggacagggacacaaccaggugccguccuuguccccacggcccucaaacc	gugaggacagcguggggacagggacacaaccaggugccguccuuguccccacggcccucaaacc	gugaggacagcguggggacagggacacaaccaggugccguccuuguccccacggcccucaaacc	gugaggacagcguggggacagggacacaaccaggugccguccuuguccccacggcccucaaaccc	gugaggacagcguggggacaggga	gugaggacagcguggggacaggga	gugaggacagcguggggacaggga	gugaggacagcguggggacaggga	gugaggacagcguggggacaggga	gugaggacagcguggggacaggga	gugaggacagcguggggacaggga	gugaggacagcguggggacaggga	gugaggacagcguggggacaggga	0	0	0	3	7	22	16	13	23	0	0	0	0.361366	0.83776	2.51153	1.68932	1.45558	2.07251
60	conserve-cli-miR-1672-3p	ccugucugugccugcuguacaggugagaggauguucugcacagcaaguguagacaggca	ccugucugugccugcuguacaggugagaggauguucugcacagcaaguguagacaggca	ccugucugugccugcuguacaggugagaggauguucugcacagcaaguguagacaggca	ccuguguccccuggucacaguacauguucaggccuggggacacaugca	ccugucugugccugcuguacaggugagaggauguucugcacagcaaguguagacaggca	ccuguguccccuggucacaguacauguucaggccuggggacacaugca	ccugucugugccugcuguacaggugagaggauguucugcacagcaaguguagacaggca	ccuguguccccuggucacaguacauguucaggccuggggacacaugca	ccuguguccccuggucacaguacauguucaggccuggggacacaugca	cacagcaaguguagacaggca	cacagcaaguguagacaggca	cacagcaaguguagacaggca	uucaggccuggggacacaugca	cacagcaaguguagacaggca	uucaggccuggggacacaugca	cacagcaaguguagacaggca	uucaggccuggggacacaugca	uucaggccuggggacacaugca	50	23	26	0	34	0	77	0	0	6.06957	2.91251	2.6366	0	4.06912	0	8.12988	0	0
61	conserve-cli-miR-1672-5p	ccugucugugccugcuguacaggugagaggauguucugcacagcaaguguagacaggca	ccugucugugccugcuguacaggugagaggauguucugcacagcaaguguagacaggca	ccugucugugccugcuguacaggugagaggauguucugcacagcaaguguagacaggca	ccuguguccccuggucacaguacauguucaggccuggggacacaugca	ccugucugugccugcuguacaggugagaggauguucugcacagcaaguguagacaggca	ccuguguccccuggucacaguacauguucaggccuggggacacaugca	ccugucugugccugcuguacaggugagaggauguucugcacagcaaguguagacaggca	ccuguguccccuggucacaguacauguucaggccuggggacacaugca	ccuguguccccuggucacaguacauguucaggccuggggacacaugca	ccugucugugccugcuguaca	ccugucugugccugcuguaca	ccugucugugccugcuguaca	ccuguguccccuggucaca	ccugucugugccugcuguaca	ccuguguccccuggucaca	ccugucugugccugcuguaca	ccuguguccccuggucaca	ccuguguccccuggucaca	3	0	2	0	2	0	12	0	0	0.364174	0	0.202815	0	0.23936	0	1.26699	0	0
62	conserve-cli-miR-1685-3p	uuuugcuacagaguuagugauauguuggccguuaauuccucagcacuauguaaucaucaguaauucuguccagcaaagu	uuuugcuacagaguuagugauauguuggccguuaauuccucagcacuauguaaucaucaguaauucuguccagcaaagu	uuuugcuacagaguuagugauauguuggccguuaauuccucagcacuauguaaucaucaguaauucuguccagcaaagua	uuuugcuacagaguuagugauauguuggccguuaauuccucagcacuauguaaucaucaguaauucuguccagcaaagu	uuuugcuacagaguuagugauauguuggccguuaauuccucagcacuauguaaucaucaguaauucuguccagcaaagu	uuuugcuacagaguuagugauauguuggccguuaauuccucagcacuauguaaucaucaguaauucuguccagcaaagu	uuuugcuacagaguuagugauauguuggccguuaauuccucagcacuauguaaucaucaguaauucuguccagcaaagu	uuuugcuacagaguuagugauauguuggccguuaauuccucagcacuauguaaucaucaguaauucuguccagcaaagu	uuuugcuacagaguuagugauauguuggccguuaauuccucagcacuauguaaucaucaguaauucuguccagcaaagu	ucaguaauucuguccagcaaagu	ucaguaauucuguccagcaaagu	ucaguaauucuguccagcaaagua	ucaguaauucuguccagcaaagu	ucaguaauucuguccagcaaagu	ucaguaauucuguccagcaaagu	ucaguaauucuguccagcaaagu	ucaguaauucuguccagcaaagu	ucaguaauucuguccagcaaagu	0	1	2	0	0	0	0	0	0	0	0.126631	0.202815	0	0	0	0	0	0
63	conserve-cli-miR-1685-5p	uuuugcuacagaguuagugauauguuggccguuaauuccucagcacuauguaaucaucaguaauucuguccagcaaagu	uuuugcuacagaguuagugauauguuggccguuaauuccucagcacuauguaaucaucaguaauucuguccagcaaagu	uuuugcuacagaguuagugauauguuggccguuaauuccucagcacuauguaaucaucaguaauucuguccagcaaagua	uuuugcuacagaguuagugauauguuggccguuaauuccucagcacuauguaaucaucaguaauucuguccagcaaagu	uuuugcuacagaguuagugauauguuggccguuaauuccucagcacuauguaaucaucaguaauucuguccagcaaagu	uuuugcuacagaguuagugauauguuggccguuaauuccucagcacuauguaaucaucaguaauucuguccagcaaagu	uuuugcuacagaguuagugauauguuggccguuaauuccucagcacuauguaaucaucaguaauucuguccagcaaagu	uuuugcuacagaguuagugauauguuggccguuaauuccucagcacuauguaaucaucaguaauucuguccagcaaagu	uuuugcuacagaguuagugauauguuggccguuaauuccucagcacuauguaaucaucaguaauucuguccagcaaagu	uuuugcuacagaguuagugaua	uuuugcuacagaguuagugau	uuuugcuacagaguuagugaua	uuuugcuacagaguuagugaua	uuuugcuacagaguuagugaua	uuuugcuacagaguuagugaua	uuuugcuacagaguuagugaua	uuuugcuacagaguuagugaua	uuuugcuacagaguuagugaua	0	2	3	0	0	0	0	0	0	0	0.253262	0.304223	0	0	0	0	0	0
64	conserve-cli-miR-1695-3p	cagcacaggacaggacaggacagggauaacgggugcuaccaaaaccgauucaucccuccugcuuccaaaagcugca	cagcacaggacaggacaggacagggauaacgggugcuaccaaaaccgauucaucccuccugcuuccaaaagcugca	cagcacaggacaggacaggacagggauaacgggugcuaccaaaaccgauucaucccuccugcuuccaaaagcugca	cagcacaggacaggacaggacagggauaacgggugcuaccaaaaccgauucaucccuccugcuuccaaaagcugca	cagcacaggacaggacaggacagggauaacgggugcuaccaaaaccgauucaucccuccugcuuccaaaagcugca	cagcacaggacaggacaggacagggauaacgggugcuaccaaaaccgauucaucccuccugcuuccaaaagcugca	cagcacaggacaggacaggacagggauaacgggugcuaccaaaaccgauucaucccuccugcuuccaaaagcugca	cagcacaggacaggacaggacagggauaacgggugcuaccaaaaccgauucaucccuccugcuuccaaaagcugca	ccugucugugccugcuguacaggugagaggauguucugcacagcaaguguagacaggcag	gcuuccaaaagcugca	gcuuccaaaagcugca	gcuuccaaaagcugca	gcuuccaaaagcugca	gcuuccaaaagcugca	gcuuccaaaagcugca	gcuuccaaaagcugca	gcuuccaaaagcugca	cacagcaaguguagacaggcag	0	0	0	0	0	0	0	0	63	0	0	0	0	0	0	0	0	5.67686
65	conserve-cli-miR-1695-5p	cagcacaggacaggacaggacagggauaacgggugcuaccaaaaccgauucaucccuccugcuuccaaaagcugca	cagcacaggacaggacaggacagggauaacgggugcuaccaaaaccgauucaucccuccugcuuccaaaagcugca	cagcacaggacaggacaggacagggauaacgggugcuaccaaaaccgauucaucccuccugcuuccaaaagcugca	cagcacaggacaggacaggacagggauaacgggugcuaccaaaaccgauucaucccuccugcuuccaaaagcugca	cagcacaggacaggacaggacagggauaacgggugcuaccaaaaccgauucaucccuccugcuuccaaaagcugca	cagcacaggacaggacaggacagggauaacgggugcuaccaaaaccgauucaucccuccugcuuccaaaagcugca	cagcacaggacaggacaggacagggauaacgggugcuaccaaaaccgauucaucccuccugcuuccaaaagcugca	cagcacaggacaggacaggacagggauaacgggugcuaccaaaaccgauucaucccuccugcuuccaaaagcugca	ccugucugugccugcuguacaggugagaggauguucugcacagcaaguguagacaggcag	cagcacaggacaggacag	cagcacaggacaggacag	cagcacaggacaggacag	cagcacaggacaggacag	cagcacaggacaggacag	cagcacaggacaggacag	cagcacaggacaggacag	cagcacaggacaggacag	ccugucugugccugcuguacag	0	0	0	0	0	0	0	0	1	0	0	0	0	0	0	0	0	0.0901089
66	conserve-cli-miR-1744-3p	gggcagagcagcagagcuggcugugcgaguccugcucuguucgcucugguaccuga	agggcagagcagcagagcuggcugugcgaguccugcucuguucgcucugguaccuga	agggcagagcagcagagcuggcugugcgaguccugcucuguucgcucugguaccuga	ggcagagcagcagagcuggcugugcgaguccugcucuguucgcucugguaccu	ggcagagcagcagagcuggcugugcgaguccugcucuguucgcucugguaccuga	agggcagagcagcagagcuggcugugcgaguccugcucuguucgcucugguaccuga	ugugcugucccauggccucugugugccuuuagcugcccucccuguugcucuggcucugcacacagaggacaaggacagagcugg	uggccgcagcagcauggagcagguuaaauuguuccuguuccggucgcugugaccaga	uggccgcagcagcauggagcagguuaaauuguuccuguuccggucgcugugaccaga	ugcucuguucgcucugguaccuga	ugcucuguucgcucugguaccuga	ugcucuguucgcucugguaccuga	ugcucuguucgcucugguaccu	ugcucuguucgcucugguaccuga	ugcucuguucgcucugguaccuga	acagaggacaaggacagagcugg	uguuccggucgcugugaccaga	uguuccggucgcugugaccaga	17	8	15	0	14	8	9	88	13	2.06365	1.01305	1.52111	0	1.67552	0.913284	0.950245	9.85318	1.17142
67	conserve-cli-miR-1750-5p	agaggaccauucggccugucuuaggcacucaucuuaggaugggaugaaggguccucugg	agaggaccauucggccugucuuaggcacucaucuuaggaugggaugaaggguccucugg	agaggaccauucggccugucuuaggcacucaucuuaggaugggaugaaggguccucugg	agaggaccauucggccugucuuaggcacucaucuuaggaugggaugaaggguccucugg	agcgaggaccacuuagaccuguggcgugagagagaggagagcaggacuaagugguccuugcug	agaggaccauucggccugucuuaggcacucaucuuaggaugggaugaaggguccucugg	agaggaccauucggccugucuuaggcacucaucuuaggaugggaugaaggguccucugg	agaggaccauucggccugucuuaggcacucaucuuaggaugggaugaaggguccucugg	agaggaccauucggccugucuuaggcacucaucuuaggaugggaugaaggguccucugg	agaggaccauucggccugucu	agaggaccauucggccugucu	agaggaccauucggccugucu	agaggaccauucggccugucu	agcgaggaccacuuagaccugu	agaggaccauucggccugucu	agaggaccauucggccugucu	agaggaccauucggccugucu	agaggaccauucggccugucu	0	2	0	0	23	0	0	0	0	0	0.253262	0	0	2.75264	0	0	0	0
68	conserve-cli-miR-1766-3p	aaucaauucagauuucuguagugccguuuuuguauggcgugcagaugaugugaaagaauauuug	aaucaauucagauuucuguagugccguuuuuguauggcgugcagaugaugugaaagaauauuug	aaucaauucagauuucuguagugccguuuuuguauggcgugcagaugaugugaaagaauauuug	aaucaauucagauuucuguagugccguuuuuguauggcgugcagaugaugugaaagaauauuug	aaucaauucagauuucuguagugccguuuuuguauggcgugcagaugaugugaaagaauauuug	aaucaauucagauuucuguagugccguuuuuguauggcgugcagaugaugugaaagaauauuug	aaucaauucagauuucuguagugccguuuuuguauggcgugcagaugaugugaaagaauauuug	aaucaauucagauuucuguagugccguuuuuguauggcgugcagaugaugugaaagaauauuug	aaucaauucagauuucuguagugccguuuuuguauggcgugcagaugaugugaaagaauauuug	ugcagaugaugugaaagaauauuug	ugcagaugaugugaaagaauauuug	ugcagaugaugugaaagaauauuug	ugcagaugaugugaaagaauauuug	ugcagaugaugugaaagaauauuug	ugcagaugaugugaaagaauauuug	ugcagaugaugugaaagaauauuug	ugcagaugaugugaaagaauauuug	ugcagaugaugugaaagaauauuug	0	0	0	7	0	0	0	0	0	0	0	0	0.843188	0	0	0	0	0
69	conserve-cli-miR-1781-1-5p	uacagcugggauuucuggacaugcagaagucuggucaaagccacucugcauuucuccuccaagcugagcc	uacagcugggauuucuggacaugcagaagucuggucaaagccacucugcauuucuccuccaagcugagcc	uacagcugggauuucuggacaugcagaagucuggucaaagccacucugcauuucuccuccaagcugagcc	uacagcugggauuucuggacaugcagaagucuggucaaagccacucugcauuucuccuccaagcugagcc	uacagcugggauuucuggacaugcagaagucuggucaaagccacucugcauuucuccuccaagcugagcc	uacagcugggauuucuggacaugcagaagucuggucaaagccacucugcauuucuccuccaagcugagcc	uacagcugggauuucuggacaugcagaagucuggucaaagccacucugcauuucuccuccaagcugagcc	uacagcugggauuucuggacaugcagaagucuggucaaagccacucugcauuucuccuccaagcugagcc	uacagcugggauuucuggacaugcagaagucuggucaaagccacucugcauuucuccuccaagcugagcc	uacagcugggauuucuggacaug	uacagcugggauuucuggacaug	uacagcugggauuucuggacaug	uacagcugggauuucuggacaug	uacagcugggauuucuggacaug	uacagcugggauuucuggacaug	uacagcugggauuucuggacaug	uacagcugggauuucuggacaug	uacagcugggauuucuggacaug	0	0	3	0	0	0	0	0	0	0	0	0.304223	0	0	0	0	0	0
70	conserve-cli-miR-1807-3p	ccagaaugaaauuugcuguccugcuaaaugccugccaaggacagcaaauuucauccuggau	ccagaaugaaauuugcuguccugcuaaaugccugccaaggacagcaaauuucauccuggau	ccagaaugaaauuugcuguccugcuaaaugccugccaaggacagcaaauuucauccuggau	ccagaaugaaauuugcuguccugcuaaaugccugccaaggacagcaaauuucauccuggau	ccagaaugaaauuugcuguccugcuaaaugccugccaaggacagcaaauuucauccuggau	ccagaaugaaauuugcuguccugcuaaaugccugccaaggacagcaaauuucauccuggau	ccagaaugaaauuugcuguccugcuaaaugccugccaaggacagcaaauuucauccuggau	ccagaaugaaauuugcuguccugcuaaaugccugccaaggacagcaaauuucauccuggau	ccagaaugaaauuugcuguccugcuaaaugccugccaaggacagcaaauuucauccuggau	ggacagcaaauuucauccuggau	ggacagcaaauuucauccuggau	ggacagcaaauuucauccuggau	ggacagcaaauuucauccuggau	ggacagcaaauuucauccuggau	ggacagcaaauuucauccuggau	ggacagcaaauuucauccuggau	ggacagcaaauuucauccuggau	ggacagcaaauuucauccuggau	0	0	1	0	0	0	0	0	0	0	0	0.101408	0	0	0	0	0	0
71	conserve-cli-miR-1807-5p	ccagaaugaaauuugcuguccugcuaaaugccugccaaggacagcaaauuucauccuggau	ccagaaugaaauuugcuguccugcuaaaugccugccaaggacagcaaauuucauccuggau	ccagaaugaaauuugcuguccugcuaaaugccugccaaggacagcaaauuucauccuggau	ccagaaugaaauuugcuguccugcuaaaugccugccaaggacagcaaauuucauccuggau	ccagaaugaaauuugcuguccugcuaaaugccugccaaggacagcaaauuucauccuggau	ccagaaugaaauuugcuguccugcuaaaugccugccaaggacagcaaauuucauccuggau	ccagaaugaaauuugcuguccugcuaaaugccugccaaggacagcaaauuucauccuggau	ccagaaugaaauuugcuguccugcuaaaugccugccaaggacagcaaauuucauccuggau	ccagaaugaaauuugcuguccugcuaaaugccugccaaggacagcaaauuucauccuggau	ccagaaugaaauuugcuguccu	ccagaaugaaauuugcuguccu	ccagaaugaaauuugcuguccu	ccagaaugaaauuugcuguccu	ccagaaugaaauuugcuguccu	ccagaaugaaauuugcuguccu	ccagaaugaaauuugcuguccu	ccagaaugaaauuugcuguccu	ccagaaugaaauuugcuguccu	0	0	2	0	0	0	0	0	0	0	0	0.202815	0	0	0	0	0	0
72	conserve-cli-miR-1843-3p	guccacaaaggcuuccaggugucuggugucccugugacauggaggugccuuuguggacgu	uccacaaaggcuuccaggugucuggugucccugugacauggaggugccuuuguggacgu	guccacaaaggcuuccaggugucuggugucccugugacauggaggugccuuuguggacgu	guccacaaaggcuuccaggugucuggugucccugugacauggaggugccuuuguggacgu	guccacaaaggcuuccaggugucuggugucccugugacauggaggugccuuuguggacgu	guccacaaaggcuuccaggugucuggugucccugugacauggaggugccuuuguggacgu	guccacaaaggcuuccaggugucuggugucccugugacauggaggugccuuuguggacgu	guccacaaaggcuuccaggugucuggugucccugugacauggaggugccuuuguggacgu	guccacaaaggcuuccaggugucuggugucccugugacauggaggugccuuuguggacgu	cauggaggugccuuuguggacgu	cauggaggugccuuuguggacgu	cauggaggugccuuuguggacgu	cauggaggugccuuuguggacgu	cauggaggugccuuuguggacgu	cauggaggugccuuuguggacgu	cauggaggugccuuuguggacgu	cauggaggugccuuuguggacgu	cauggaggugccuuuguggacgu	6	7	11	0	0	4	0	0	0	0.728348	0.886416	1.11548	0	0	0.456642	0	0	0
73	conserve-cli-miR-1905b-3p	cugggugcugggcgcagguggccuguccuggugggugucaccagcccccggcacacaggg	cugggugcugggcgcagguggccuguccuggugggugucaccagcccccggcacacaggg	cugggugcugggcgcagguggccuguccuggugggugucaccagcccccggcacacaggg	cugggugcugggcgcagguggccuguccuggugggugucaccagcccccggcacacaggg	cugggugcugggcgcagguggccuguccuggugggugucaccagcccccggcacacaggg	cugggugcugggcgcagguggccuguccuggugggugucaccagcccccggcacacaggg	cugggugcugggcgcagguggccuguccuggugggugucaccagcccccggcacacaggg	cugggugcugggcgcagguggccuguccuggugggugucaccagcccccggcacacaggg	cugggugcugggcgcagguggccuguccuggugggugucaccagcccccggcacacaggg	caccagcccccggcacacaggg	caccagcccccggcacacaggg	caccagcccccggcacacaggg	caccagcccccggcacacaggg	caccagcccccggcacacaggg	caccagcccccggcacacaggg	caccagcccccggcacacaggg	caccagcccccggcacacaggg	caccagcccccggcacacaggg	0	0	3	0	0	0	0	0	0	0	0	0.304223	0	0	0	0	0	0
74	conserve-cli-miR-1951-5p	uuaguggaacugauccuuucagagcauuaguuuuauuucugcaagguucugcuucugcaaggu	uuaguggaacugauccuuucagagcauuaguuuuauuucugcaagguucugcuucugcaagg	uuaguggaacugauccuuucagagcauuaguuuuauuucugcaagguucugcuucugcaagg	uuaguggaacugauccuuucagagcauuaguuuuauuucugcaagguucugcuucugcaagg	uuaguggaacugauccuuucagagcauuaguuuuauuucugcaagguucugcuucugcaagg	uuaguggaacugauccuuucagagcauuaguuuuauuucugcaagguucugcuucugcaagg	uuaguggaacugauccuuucagagcauuaguuuuauuucugcaagguucugcuucugcaagg	uuaguggaacugauccuuucagagcauuaguuuuauuucugcaagguucugcuucugcaagg	uuaguggaacugauccuuucagagcauuaguuuuauuucugcaagguucugcuucugcaagg	uuaguggaacugauccuuuca	uuaguggaacugauccuuuca	uuaguggaacugauccuuuca	uuaguggaacugauccuuuca	uuaguggaacugauccuuuca	uuaguggaacugauccuuuca	uuaguggaacugauccuuuca	uuaguggaacugauccuuuca	uuaguggaacugauccuuuca	4	0	6	0	0	0	0	0	0	0.485565	0	0.608446	0	0	0	0	0	0
75	conserve-cli-miR-1976-1-3p	gcagcgugccgggcugggacaggugcucugauguuccucuccugccagugugcgcugcug	gcagcgugccgggcugggacaggugcucugauguuccucuccugccagugugcgcugcug	gcagcgugccgggcugggacaggugcucugauguuccucuccugccagugugcgcugcug	gcagcgugccgggcugggacaggugcucugauguuccucuccugccagugugcgcugcug	gcagcgugccgggcugggacaggugcucugauguuccucuccugccagugugcgcugcug	gcagcgugccgggcugggacaggugcucugauguuccucuccugccagugugcgcugcug	gcagcgugccgggcugggacaggugcucugauguuccucuccugccagugugcgcugcug	gcagcgugccgggcugggacaggugcucugauguuccucuccugccagugugcgcugcug	gcagcgugccgggcugggacaggugcucugauguuccucuccugccagugugcgcugcug	ucuccugccagugugcgcugcug	ucuccugccagugugcgcugcug	ucuccugccagugugcgcugcug	ucuccugccagugugcgcugcug	ucuccugccagugugcgcugcug	ucuccugccagugugcgcugcug	ucuccugccagugugcgcugcug	ucuccugccagugugcgcugcug	ucuccugccagugugcgcugcug	6	0	0	0	0	0	0	0	0	0.728348	0	0	0	0	0	0	0	0
76	conserve-cli-miR-200b-5p	uucuuacucagaggagguuucuguggacaucaguggaaacauugucugaguaggacaa	uucuuacucagaggagguuucuguggacaucaguggaaacauugucugaguaggacaa	uucuuacucagaggagguuucuguggacaucaguggaaacauugucugaguaggacaa	uucuuacucagaggagguuucuguggacaucaguggaaacauugucugaguaggacaa	uucuuacucagaggagguuucuguggacaucaguggaaacauugucugaguaggacaa	uucuuacucagaggagguuucuguggacaucaguggaaacauugucugaguaggacaa	uucuuacucagaggagguuucuguggacaucaguggaaacauugucugaguaggacaa	uucuuacucagaggagguuucuguggacaucaguggaaacauugucugaguaggacaa	uucuuacucagaggagguuucuguggacaucaguggaaacauugucugaguaggacaa	uucuuacucagaggagguuucug	uucuuacucagaggagguuucug	uucuuacucagaggagguuucug	uucuuacucagaggagguuucug	uucuuacucagaggagguuucug	uucuuacucagaggagguuucug	uucuuacucagaggagguuucug	uucuuacucagaggagguuucug	uucuuacucagaggagguuucug	3	0	0	0	0	0	0	0	0	0.364174	0	0	0	0	0	0	0	0
77	conserve-cli-miR-205a-3p	uccuucauccuaaaccuuugcccuuauucuuagcagggcaaaagugcaggaugaaggauu	ccuucauccugcacuuuugcccugcuaagaauaagggcaaagguuuaggaugaaggauu	uccuucauccuaaaccuuugcccuuauucuuagcagggcaaaagugcaggaugaaggauu	uccuucauccuaaaccuuugcccuuauucuuagcagggcaaaagugcaggaugaaggauu	uccuucauccuaaaccuuugcccuuauucuuagcagggcaaaagugcaggaugaaggauu	uccuucauccuaaaccuuugcccuuauucuuagcagggcaaaagugcaggaugaaggauu	uccuucauccuaaaccuuugcccuuauucuuagcagggcaaaagugcaggaugaaggauu	uccuucauccuaaaccuuugcccuuauucuuagcagggcaaaagugcaggaugaaggauu	uccuucauccuaaaccuuugcccuuauucuuagcagggcaaaagugcaggaugaaggauu	caaaagugcaggaugaaggauu	caaagguuuaggaugaaggauu	caaaagugcaggaugaaggauu	caaaagugcaggaugaaggauu	caaaagugcaggaugaaggauu	caaaagugcaggaugaaggauu	caaaagugcaggaugaaggauu	caaaagugcaggaugaaggauu	caaaagugcaggaugaaggauu	0	2	0	2	4	0	0	0	0	0	0.253262	0	0.240911	0.47872	0	0	0	0
78	conserve-cli-miR-205a-5p	uccuucauccuaaaccuuugcccuuauucuuagcagggcaaaagugcaggaugaaggauu	ccuucauccugcacuuuugcccugcuaagaauaagggcaaagguuuaggaugaaggauu	uccuucauccuaaaccuuugcccuuauucuuagcagggcaaaagugcaggaugaaggauu	uccuucauccuaaaccuuugcccuuauucuuagcagggcaaaagugcaggaugaaggauu	uccuucauccuaaaccuuugcccuuauucuuagcagggcaaaagugcaggaugaaggauu	uccuucauccuaaaccuuugcccuuauucuuagcagggcaaaagugcaggaugaaggauu	uccuucauccuaaaccuuugcccuuauucuuagcagggcaaaagugcaggaugaaggauu	uccuucauccuaaaccuuugcccuuauucuuagcagggcaaaagugcaggaugaaggauu	uccuucauccuaaaccuuugcccuuauucuuagcagggcaaaagugcaggaugaaggauu	uccuucauccuaaaccuuugcc	ccuucauccugcacuuuugccc	uccuucauccuaaaccuuugcc	uccuucauccuaaaccuuugcc	uccuucauccuaaaccuuugcc	uccuucauccuaaaccuuugcc	uccuucauccuaaaccuuugcc	uccuucauccuaaaccuuugcc	uccuucauccuaaaccuuugcc	0	1	0	0	1	0	0	0	0	0	0.126631	0	0	0.11968	0	0	0	0
79	conserve-cli-miR-214b-3p	ccugucugugccugcuguacaggugagaggauguucugcacagcaaguguagacaggca	ccugucugugccugcuguacaggugagaggauguucugcacagcaaguguagacaggca	ccugucugugccugcuguacaggugagaggauguucugcacagcaaguguagacaggca	ccugucugugccugcuguacaggugagaggauguucugcacagcaaguguagacaggca	ccugucugugccugcuguacaggugagaggauguucugcacagcaaguguagacaggca	ccugucugugccugcuguacaggugagaggauguucugcacagcaaguguagacaggca	ccugucugugccugcuguacaggugagaggauguucugcacagcaaguguagacaggca	ccugucugugccugcuguacaggugagaggauguucugcacagcaaguguagacaggca	ccugucugugccugcuguacaggugagaggauguucugcacagcaaguguagacaggca	cacagcaaguguagacaggca	cacagcaaguguagacaggca	cacagcaaguguagacaggca	cacagcaaguguagacaggca	cacagcaaguguagacaggca	cacagcaaguguagacaggca	cacagcaaguguagacaggca	cacagcaaguguagacaggca	cacagcaaguguagacaggca	0	0	0	22	0	18	0	52	0	0	0	0	2.65002	0	2.05489	0	5.82233	0
80	conserve-cli-miR-214b-5p	ccugucugugccugcuguacaggugagaggauguucugcacagcaaguguagacaggca	ccugucugugccugcuguacaggugagaggauguucugcacagcaaguguagacaggca	ccugucugugccugcuguacaggugagaggauguucugcacagcaaguguagacaggca	ccugucugugccugcuguacaggugagaggauguucugcacagcaaguguagacaggca	ccugucugugccugcuguacaggugagaggauguucugcacagcaaguguagacaggca	ccugucugugccugcuguacaggugagaggauguucugcacagcaaguguagacaggca	ccugucugugccugcuguacaggugagaggauguucugcacagcaaguguagacaggca	ccugucugugccugcuguacaggugagaggauguucugcacagcaaguguagacaggca	ccugucugugccugcuguacaggugagaggauguucugcacagcaaguguagacaggca	ccugucugugccugcuguacag	ccugucugugccugcuguacag	ccugucugugccugcuguacag	ccugucugugccugcuguacagg	ccugucugugccugcuguacag	ccugucugugccugcuguacag	ccugucugugccugcuguacag	ccugucugugccugcuguacagg	ccugucugugccugcuguacag	0	0	0	1	0	1	0	10	0	0	0	0	0.120455	0	0.114161	0	1.11968	0
81	conserve-cli-miR-2308-5p	gcagggcgcaggagccgggcuggcugccgugcccggggugccagcccagcccuggucccacac	agccagcacgcugcccagcauguacagcuugaccauuuuccuguugggcuucuggcugagcauuu	agccagcacgcugcccagcauguacagcuugaccauuuuccuguugggcuucuggcugagcauuu	agccagcacgcugcccagcauguacagcuugaccauuuuccuguugggcuucuggcugagcauuu	agccagcacgcugcccagcauguacagcuugaccauuuuccuguugggcuucuggcugagcauuu	agccagcacgcugcccagcauguacagcuugaccauuuuccuguugggcuucuggcugagcauuu	agccagcacgcugcccagcauguacagcuugaccauuuuccuguugggcuucuggcugagcauuu	agccagcacgcugcccagcauguacagcuugaccauuuuccuguugggcuucuggcugagcauuu	agccagcacgcugcccagcauguacagcuugaccauuuuccuguugggcuucuggcugagcauuu	gcagggcgcaggagccgggcuggc	agccagcacgcugcccagca	agccagcacgcugcccagca	agccagcacgcugcccagca	agccagcacgcugcccagca	agccagcacgcugcccagca	agccagcacgcugcccagca	agccagcacgcugcccagca	agccagcacgcugcccagca	12	0	0	0	0	0	0	0	0	1.4567	0	0	0	0	0	0	0	0
82	conserve-cli-miR-2322-5p	uagaaagcuggugugugggugaguguuggucuuuucccucacacaucagcucucgaaa	uagaaagcuggugugugggugaguguuggucuuuucccucacacaucagcucucgaaa	uagaaagcuggugugugggugaguguuggucuuuucccucacacaucagcucucgaaa	uagaaagcuggugugugggugaguguuggucuuuucccucacacaucagcucucgaaa	uagaaagcuggugugugggugaguguuggucuuuucccucacacaucagcucucgaaa	uagaaagcuggugugugggugaguguuggucuuuucccucacacaucagcucucgaaa	uagaaagcuggugugugggugaguguuggucuuuucccucacacaucagcucucgaaa	uagaaagcuggugugugggugaguguuggucuuuucccucacacaucagcucucgaaa	uagaaagcuggugugugggugaguguuggucuuuucccucacacaucagcucucgaaa	uagaaagcugguguguggguga	uagaaagcugguguguggguga	uagaaagcugguguguggguga	uagaaagcugguguguggguga	uagaaagcugguguguggguga	uagaaagcugguguguggguga	uagaaagcugguguguggguga	uagaaagcugguguguggguga	uagaaagcugguguguggguga	0	0	0	3	0	0	2	0	0	0	0	0	0.361366	0	0	0.211166	0	0
83	conserve-cli-miR-2399-5p	guuucuguuguugaggaagagaguugaauaauacauuauuauuuuuaccugaacacagggauaa	guuucuguuguugaggaagagaguugaauaauacauuauuauuuuuaccugaacacagggauaa	guuucuguuguugaggaagagaguugaauaauacauuauuauuuuuaccugaacacagggauaa	guuucuguuguugaggaagagaguugaauaauacauuauuauuuuuaccugaacacagggauaa	guuucuguuguugaggaagagaguugaauaauacauuauuauuuuuaccugaacacagggauaa	guuucuguuguugaggaagagaguugaauaauacauuauuauuuuuaccugaacacagggauaa	guuucuguuguugaggaagagaguugaauaauacauuauuauuuuuaccugaacacagggauaa	guuucuguuguugaggaagagaguugaauaauacauuauuauuuuuaccugaacacagggauaa	guuucuguuguugaggaagagaguugaauaauacauuauuauuuuuaccugaacacagggauaa	guuucuguuguugagga	guuucuguuguugagga	guuucuguuguugagga	guuucuguuguugagga	guuucuguuguugagga	guuucuguuguugagga	guuucuguuguugagga	guuucuguuguugagga	guuucuguuguugagga	74	49	29	0	0	0	0	0	0	8.98296	6.20491	2.94082	0	0	0	0	0	0
84	conserve-cli-miR-2404-2-5p	uugcacuguucguaaucuguuaacaguaccuuucugauaacagguuccauuccagugcuaca	uugcacuguucguaaucuguuaacaguaccuuucugauaacagguuccauuccagugcuaca	uugcacuguucguaaucuguuaacaguaccuuucugauaacagguuccauuccagugcuaca	uugcacuguucguaaccucuugacagcauauuucugugaauagguuccauuccagugcuaca	uugcacuguucguaaccucuugacagcauauuucugugaauagguuccauuccagugcuaca	uugcacuguucguaaccucuugacagcauauuucugugaauagguuccauuccagugcuaca	uugcacuguucguaaccucuugacagcauauuucugugaauagguuccauuccagugcuaca	uugcacuguucguaaucuguuaacaguaccuuucugauaacagguuccauuccagugcuaca	uugcacuguucguaaucuguuaacaguaccuuucugauaacagguuccauuccagugcuaca	uugcacuguucguaaucuguua	uugcacuguucguaaucuguua	uugcacuguucguaaucuguua	uugcacuguucguaaccucuugac	uugcacuguucguaaccucuugac	uugcacuguucguaaccucuugac	uugcacuguucguaaccucuugac	uugcacuguucguaaucuguua	uugcacuguucguaaucuguua	11	0	0	39	20	33	20	16	0	1.3353	0	0	4.69776	2.3936	3.7673	2.11166	1.79149	0
85	conserve-cli-miR-2404-3p	cugcacugcucagccuugcucugagccuggcacgugcuacaucuauagagcaucagggagagaggagcaggg	ugagugccagcugugccugacccuuugccccaagugagcuaggcaggaauggcacucaag	cugcacugcucagccuugcucugagccuggcacgugcuacaucuauagagcaucagggagagaggagcaggg	cugcacugcucagccuugcucugagccuggcacgugcuacaucuauagagcaucagggagagaggagcaggg	cugcacugcucagccuugcucugagccuggcacgugcuacaucuauagagcaucagggagagaggagcaggg	cugcacugcucagccuugcucugagccuggcacgugcuacaucuauagagcaucagggagagaggagcaggg	cugcacugcucagccuugcucugagccuggcacgugcuacaucuauagagcaucagggagagaggagcaggg	cugcacugcucagccuugcucugagccuggcacgugcuacaucuauagagcaucagggagagaggagcaggg	cugcacugcucagccuugcucugagccuggcacgugcuacaucuauagagcaucagggagagaggagcaggg	agagcaucagggagagaggagcaggg	uaggcaggaauggcacucaag	agagcaucagggagagaggagcaggg	agagcaucagggagagaggagcaggg	agagcaucagggagagaggagcaggg	agagcaucagggagagaggagcaggg	agagcaucagggagagaggagcaggg	agagcaucagggagagaggagcaggg	agagcaucagggagagaggagcaggg	0	5	0	0	0	0	0	0	0	0	0.633155	0	0	0	0	0	0	0
86	conserve-cli-miR-2453-3p	uccucaggcaauguaagucaguauuaauggaguaaaagccgacuuacaccagcugaggaug	uccucaggcaauguaagucaguauuaauggaguaaaagccgacuuacaccagcugaggaug	uccucaggcaauguaagucaguauuaauggaguaaaagccgacuuacaccagcugaggaug	uccucaggcaauguaagucaguauuaauggaguaaaagccgacuuacaccagcugaggaug	uccucaggcaauguaagucaguauuaauggaguaaaagccgacuuacaccagcugaggaug	uccucaggcaauguaagucaguauuaauggaguaaaagccgacuuacaccagcugaggaug	uccucagcugguguaagucggcuuuuacuccauuaauacugacuuacauugccugaggacc	uccucaggcaauguaagucaguauuaauggaguaaaagccgacuuacaccagcugaggaug	uccucagcugguguaagucggcuuuuacuccauuaauacugacuuacauugccugaggacc	cgacuuacaccagcugaggaug	cgacuuacaccagcugaggaug	cgacuuacaccagcugaggaug	cgacuuacaccagcugaggaug	cgacuuacaccagcugaggaug	cgacuuacaccagcugaggaug	ugacuuacauugccugaggacc	cgacuuacaccagcugaggaug	ugacuuacauugccugaggacc	0	0	0	0	0	0	59	0	95	0	0	0	0	0	0	6.22939	0	8.56035
87	conserve-cli-miR-2453-5p	uccucaggcaauguaagucaguauuaauggaguaaaagccgacuuacaccagcugaggaug	uccucaggcaauguaagucaguauuaauggaguaaaagccgacuuacaccagcugaggaug	uccucaggcaauguaagucaguauuaauggaguaaaagccgacuuacaccagcugaggaug	uccucaggcaauguaagucaguauuaauggaguaaaagccgacuuacaccagcugaggaug	uccucaggcaauguaagucaguauuaauggaguaaaagccgacuuacaccagcugaggaug	uccucaggcaauguaagucaguauuaauggaguaaaagccgacuuacaccagcugaggaug	uccucagcugguguaagucggcuuuuacuccauuaauacugacuuacauugccugaggacc	uccucaggcaauguaagucaguauuaauggaguaaaagccgacuuacaccagcugaggaug	uccucagcugguguaagucggcuuuuacuccauuaauacugacuuacauugccugaggacc	uccucaggcaauguaagucagu	uccucaggcaauguaagucagu	uccucaggcaauguaagucagu	uccucaggcaauguaagucagu	uccucaggcaauguaagucagu	uccucaggcaauguaagucagu	uccucagcugguguaagucggcu	uccucaggcaauguaagucagu	uccucagcugguguaagucggcu	0	0	0	0	0	0	10	0	14	0	0	0	0	0	0	1.05583	0	1.26152
88	conserve-cli-miR-26-3p	ugcaaguaaccaagaauaggccagcucggauggauacagccuauccuggauuacuugaacc	ugcaaguaaccaagaauaggccagcucggauggauacagccuauccuggauuacuugaacc	ugcaaguaaccaagaauaggccagcucggauggauacagccuauccuggauuacuugaacc	ugcaaguaaccaagaauaggccagcucggauggauacagccuauccuggauuacuugaacc	ugcaaguaaccaagaauaggccagcucggauggauacagccuauccuggauuacuugaacc	ugcaaguaaccaagaauaggccagcucggauggauacagccuauccuggauuacuugaacc	ugcaaguaaccaagaauaggccagcucggauggauacagccuauccuggauuacuugaacc	ugcaaguaaccaagaauaggccagcucggauggauacagccuauccuggauuacuugaacc	ugcaaguaaccaagaauaggccagcucggauggauacagccuauccuggauuacuugaacc	ccuauccuggauuacuugaacc	ccuauccuggauuacuugaacc	ccuauccuggauuacuugaacc	ccuauccuggauuacuugaacc	ccuauccuggauuacuugaacc	ccuauccuggauuacuugaacc	ccuauccuggauuacuugaacc	ccuauccuggauuacuugaacc	ccuauccuggauuacuugaacc	100	49	42	21	62	29	22	30	15	12.1391	6.20491	4.25912	2.52956	7.42016	3.31065	2.32282	3.35904	1.35163
89	conserve-cli-miR-3122-1-3p	auugggacacuguccugcucacuuuuucauacagaagaguggcaaguucaaugucucauugu	auugggacacuguccugcucacuuuuucauacagaagaguggcaaguucaaugucucauugu	auugggacacuguccugcucacuuuuucauacagaagaguggcaaguucaaugucucauugu	auugggacacuguccugcucacuuuuucauacagaagaguggcaaguucaaugucucauugu	auugggacacuguccugcucacuuuuucauacagaagaguggcaaguucaaugucucauugu	ugggacacuguccugcucacuuuuucauacagaagaguggcaaguucaaugucucauugu	ugggacacuguccugcucacuuuuucauacagaagaguggcaaguucaaugucucauu	auugggacacuguccugcucacuuuuucauacagaagaguggcaaguucaaugucucauugu	auugggacacuguccugcucacuuuuucauacagaagaguggcaaguucaaugucucauuguc	uggcaaguucaaugucucauugu	uggcaaguucaaugucucauugu	uggcaaguucaaugucucauugu	uggcaaguucaaugucucauugu	uggcaaguucaaugucucauugu	uggcaaguucaaugucucauugu	uggcaaguucaaugucucauu	uggcaaguucaaugucucauugu	uggcaaguucaaugucucauuguc	0	0	0	1	0	2	0	0	3	0	0	0	0.120455	0	0.228321	0	0	0.270327
90	conserve-cli-miR-3122-1-5p	auugggacacuguccugcucacuuuuucauacagaagaguggcaaguucaaugucucauugu	auugggacacuguccugcucacuuuuucauacagaagaguggcaaguucaaugucucauugu	auugggacacuguccugcucacuuuuucauacagaagaguggcaaguucaaugucucauugu	auugggacacuguccugcucacuuuuucauacagaagaguggcaaguucaaugucucauugu	auugggacacuguccugcucacuuuuucauacagaagaguggcaaguucaaugucucauugu	ugggacacuguccugcucacuuuuucauacagaagaguggcaaguucaaugucucauugu	ugggacacuguccugcucacuuuuucauacagaagaguggcaaguucaaugucucauu	auugggacacuguccugcucacuuuuucauacagaagaguggcaaguucaaugucucauugu	auugggacacuguccugcucacuuuuucauacagaagaguggcaaguucaaugucucauuguc	auugggacacuguccugcucacu	auugggacacuguccugcucacu	auugggacacuguccugcucacu	auugggacacuguccugcucacu	auugggacacuguccugcucacu	ugggacacuguccugcucacu	ugggacacuguccugcucacu	auugggacacuguccugcucacu	auugggacacuguccugcucacu	0	0	0	2	13	6	12	0	12	0	0	0	0.240911	1.55584	0.684963	1.26699	0	1.08131
91	conserve-cli-miR-3126-3p	cucuccccccuuucccucuguugggcugacagaucagaguuuccuccccagcagagggacugggaaugggcucgggc	cucuccccccuuucccucuguugggcugacagaucagaguuuccuccccagcagagggacugggaaugggcucgggc	cucuccccccuuucccucuguugggcugacagaucagaguuuccuccccagcagagggacugggaaugggcucgggc	cucuccccccuuucccucuguugggcugacagaucagaguuuccuccccagcagagggacugggaaugggcucgggc	cucuccccccuuucccucuguugggcugacagaucagaguuuccuccccagcagagggacugggaaugggcucgggc	cucuccccccuuucccucuguugggcugacagaucagaguuuccuccccagcagagggacugggaaugggcucgggc	cucuccccccuuucccucuguugggcugacagaucagaguuuccuccccagcagagggacugggaaugggcucgggc	cucuccccccuuucccucuguugggcugacagaucagaguuuccuccccagcagagggacugggaaugggcucgggc	cucuccccccuuucccucuguugggcugacagaucagaguuuccuccccagcagagggacugggaaugggcucgggc	agagggacugggaaugggcucgggc	agagggacugggaaugggcucgggc	agagggacugggaaugggcucgggc	agagggacugggaaugggcucgggc	agagggacugggaaugggcucgggc	agagggacugggaaugggcucgggc	agagggacugggaaugggcucgggc	agagggacugggaaugggcucgggc	agagggacugggaaugggcucgggc	0	0	0	0	0	0	3	0	0	0	0	0	0	0	0	0.316748	0	0
92	conserve-cli-miR-3151-5p	ucugaucccuugccuguucucugcauuguccccugcagcagggacagaaggagagcagagu	ucugaucccuugccuguucucugcauuguccccugcagcagggacagaaggagagcagagu	ucugaucccuugccuguucucugcauuguccccugcagcagggacagaaggagagcagagu	ucugaucccuugccuguucucugcauuguccccugcagcagggacagaaggagagcagagu	ucugaucccuugccuguucucugcauuguccccugcagcagggacagaaggagagcagagu	ucugaucccuugccuguucucugcauuguccccugcagcagggacagaaggagagcagagu	ucugaucccuugccuguucucugcauuguccccugcagcagggacagaaggagagcagagu	ucugaucccuugccuguucucugcauuguccccugcagcagggacagaaggagagcagagu	ucugaucccuugccuguucucugcauuguccccugcagcagggacagaaggagagcagagu	ucugaucccuugccuguucucugc	ucugaucccuugccuguucucugc	ucugaucccuugccuguucucugc	ucugaucccuugccuguucucugc	ucugaucccuugccuguucucugc	ucugaucccuugccuguucucugc	ucugaucccuugccuguucucugc	ucugaucccuugccuguucucugc	ucugaucccuugccuguucucugc	6	16	0	0	0	4	0	16	0	0.728348	2.02609	0	0	0	0.456642	0	1.79149	0
93	conserve-cli-miR-3156-5p	aucccacuucugccaccagugacacagcucuggcagccauguggguucu	aucccacuucugacaccaaauugucgugagggagaauga	aucccacuucugacaccaaauugucgugagggagaauga	aucccacuucugacaccaaauugucgugagggagaauga	aucccacuucugccaccagugacacagcucuggcagccauguggguucu	aucccacuucugccaccagugacacagcucuggcagccauguggguucu	aucccacuucugacaccaaauugucgugagggagaauga	aucccacuucugccaccagugacacagcucuggcagccauguggguucu	aucccacuucugacaccaaauugucgugagggagaauga	aucccacuucugccacca	aucccacuucugacacca	aucccacuucugacacca	aucccacuucugacacca	aucccacuucugccacca	aucccacuucugccacca	aucccacuucugacacca	aucccacuucugccacca	aucccacuucugacacca	0	6740	1813	637	0	0	337	0	194	0	853.492	183.852	76.7301	0	0	35.5814	0	17.4811
94	conserve-cli-miR-345-3p	ucccugaauuaugugauagccuuugguuuugguugggcuguaacaugauuugggaau	ucccugaauuaugugauagccuuugguuuugguugggcuguaacaugauuugggaau	ucccugaauuaugugauagccuuugguuuugguugggcuguaacaugauuugggaaug	ucccugaauuaugugauagccuuugguuuugguugggcuguaacaugauuugggaau	ucccugaauuaugugauagccuuugguuuugguugggcuguaacaugauuugggaau	ucccugaauuaugugauagccuuugguuuugguugggcuguaacaugauuugggaau	ucccugaauuaugugauagccuuugguuuugguugggcuguaacaugauuugggaau	ucccugaauuaugugauagccuuugguuuugguugggcuguaacaugauuugggaau	ucccugaauuaugugauagccuuugguuuugguugggcuguaacaugauuugggaau	gcuguaacaugauuugggaau	gcuguaacaugauuugggaau	gcuguaacaugauuugggaaug	gcuguaacaugauuugggaau	gcuguaacaugauuugggaau	gcuguaacaugauuugggaau	gcuguaacaugauuugggaau	gcuguaacaugauuugggaau	gcuguaacaugauuugggaau	0	0	1	0	0	0	0	0	0	0	0	0.101408	0	0	0	0	0	0
95	conserve-cli-miR-345-5p	ucccugaauuaugugauagccuuugguuuugguugggcuguaacaugauuugggaau	ucccugaauuaugugauagccuuugguuuugguugggcuguaacaugauuugggaau	ucccugaauuaugugauagccuuugguuuugguugggcuguaacaugauuugggaaug	ucccugaauuaugugauagccuuugguuuugguugggcuguaacaugauuugggaau	ucccugaauuaugugauagccuuugguuuugguugggcuguaacaugauuugggaau	ucccugaauuaugugauagccuuugguuuugguugggcuguaacaugauuugggaau	ucccugaauuaugugauagccuuugguuuugguugggcuguaacaugauuugggaau	ucccugaauuaugugauagccuuugguuuugguugggcuguaacaugauuugggaau	ucccugaauuaugugauagccuuugguuuugguugggcuguaacaugauuugggaau	ucccugaauuaugugauagccu	ucccugaauuaugugauagccu	ucccugaauuaugugauagccu	ucccugaauuaugugauagccu	ucccugaauuaugugauagccu	ucccugaauuaugugauagccu	ucccugaauuaugugauagccu	ucccugaauuaugugauagccu	ucccugaauuaugugauagccu	10	14	17	39	161	42	124	41	0	1.21391	1.77283	1.72393	4.69776	19.2685	4.79474	13.0923	4.59069	0
96	conserve-cli-miR-3529-3p	gggcagacugugacuuguuguggugggaugagccauacaacaacaaaaucacuagucuuccag	gggcagacugugacuuguuguggugggaugagccauacaacaacaaaaucacuagucuuccag	gggcagacugugacuuguuguggugggaugagccauacaacaacaaaaucacuagucuuccag	gggcagacugugacuuguuguggugggaugagccauacaacaacaaaaucacuagucuuccag	gggcagacugugacuuguuguggugggaugagccauacaacaacaaaaucacuagucuuccag	gggcagacugugacuuguuguggugggaugagccauacaacaacaaaaucacuagucuuccag	gggcagacugugacuuguuguggugggaugagccauacaacaacaaaaucacuagucuuccag	gggcagacugugacuuguuguggugggaugagccauacaacaacaaaaucacuagucuuccag	gggcagacugugacuuguuguggugggaugagccauacaacaacaaaaucacuagucuuccag	aacaaaaucacuagucuuccag	acaaaaucacuagucuuccag	aacaaaaucacuagucuuccag	aacaaaaucacuagucuuccag	aacaaaaucacuagucuuccag	aacaaaaucacuagucuuccag	acaaaaucacuagucuuccag	aacaaaaucacuagucuuccag	aacaaaaucacuagucuuccag	3	0	6	1	1	6	0	7	4	0.364174	0	0.608446	0.120455	0.11968	0.684963	0	0.783776	0.360436
97	conserve-cli-miR-3529-5p	gggcagacugugacuuguuguggugggaugagccauacaacaacaaaaucacuagucuuccag	gggcagacugugacuuguuguggugggaugagccauacaacaacaaaaucacuagucuuccag	gggcagacugugacuuguuguggugggaugagccauacaacaacaaaaucacuagucuuccag	gggcagacugugacuuguuguggugggaugagccauacaacaacaaaaucacuagucuuccag	gggcagacugugacuuguuguggugggaugagccauacaacaacaaaaucacuagucuuccag	gggcagacugugacuuguuguggugggaugagccauacaacaacaaaaucacuagucuuccag	gggcagacugugacuuguuguggugggaugagccauacaacaacaaaaucacuagucuuccag	gggcagacugugacuuguuguggugggaugagccauacaacaacaaaaucacuagucuuccag	gggcagacugugacuuguuguggugggaugagccauacaacaacaaaaucacuagucuuccag	gggcagacugugacuuguugu	gggcagacugugacuuguugu	gggcagacugugacuuguugu	gggcagacugugacuuguugu	gggcagacugugacuuguugu	gggcagacugugacuuguugu	gggcagacugugacuuguugu	gggcagacugugacuuguugu	gggcagacugugacuuguugu	2	0	5	3	4	4	0	14	6	0.242783	0	0.507038	0.361366	0.47872	0.456642	0	1.56755	0.540653
98	conserve-cli-miR-3675-3p	aucucuacagguaauugugagauugcuauaaagacaucacauuugccugcagagauuu	aaucucuacagguaauugugagauugcuauaaagacaucacauuugccugcagagauu	aaucucuacagguaauugugagauugcuauaaagacaucacauuugccugcagagauu	aaucucuacagguaauugugagauugcuauaaagacaucacauuugccugcagagauu	gaaucucuacagguaauugugagauugcuauaaagacaucacauuugccugcagagauuu	gaaucucuacagguaauugugagauugcuauaaagacaucacauuugccugcagagauu	aucucuacagguaauugugagauugcuauaaagacaucacauuugccugcagagauu	aaucucuacagguaauugugagauugcuauaaagacaucacauuugccugcagagauu	aaucucuacagguaauugugagauugcuauaaagacaucacauuugccugcagagauu	ucacauuugccugcagagauuu	cacauuugccugcagagauu	cacauuugccugcagagauu	cacauuugccugcagagauu	ucacauuugccugcagagauuu	ucacauuugccugcagagauu	cacauuugccugcagagauu	cacauuugccugcagagauu	cacauuugccugcagagauu	2	0	0	0	3	1	1	0	0	0.242783	0	0	0	0.35904	0.114161	0.105583	0	0
99	conserve-cli-miR-3675-5p	aucucuacagguaauugugagauugcuauaaagacaucacauuugccugcagagauuu	aaucucuacagguaauugugagauugcuauaaagacaucacauuugccugcagagauu	aaucucuacagguaauugugagauugcuauaaagacaucacauuugccugcagagauu	aaucucuacagguaauugugagauugcuauaaagacaucacauuugccugcagagauu	gaaucucuacagguaauugugagauugcuauaaagacaucacauuugccugcagagauuu	gaaucucuacagguaauugugagauugcuauaaagacaucacauuugccugcagagauu	aucucuacagguaauugugagauugcuauaaagacaucacauuugccugcagagauu	aaucucuacagguaauugugagauugcuauaaagacaucacauuugccugcagagauu	aaucucuacagguaauugugagauugcuauaaagacaucacauuugccugcagagauu	aucucuacagguaauugugaga	aaucucuacagguaauuguga	aaucucuacagguaauuguga	aaucucuacagguaauuguga	gaaucucuacagguaauuguga	gaaucucuacagguaauuguga	aucucuacagguaauugugaga	aaucucuacagguaauuguga	aaucucuacagguaauuguga	3	0	0	0	2	4	8	0	0	0.364174	0	0	0	0.23936	0.456642	0.844662	0	0
100	conserve-cli-miR-423-5p	cgcucggucccagucggggcgcuggcgcaagcggugccgugagggaugcgggaggg	cgcucggucccagucggggcgcuggcgcaagcggugccgugagggaugcgggaggg	cgcucggucccagucggggcgcuggcgcaagcggugccgugagggaugcgggaggg	cgcucggucccagucggggcgcuggcgcaagcggugccgugagggaugcgggaggg	cgcucggucccagucggggcgcuggcgcaagcggugccgugagggaugcgggaggg	cgcucggucccagucggggcgcuggcgcaagcggugccgugagggaugcgggaggg	cgcucggucccagucggggcgcuggcgcaagcggugccgugagggaugcgggaggg	cgcucggucccagucggggcgcuggcgcaagcggugccgugagggaugcgggaggg	cgcucggucccagucggggcgcuggcgcaagcggugccgugagggaugcgggaggg	cgcucggucccagucggg	cgcucggucccagucggg	cgcucggucccagucggg	cgcucggucccagucggg	cgcucggucccagucggg	cgcucggucccagucggg	cgcucggucccagucggg	cgcucggucccagucggg	cgcucggucccagucggg	0	0	2	0	0	0	0	0	0	0	0	0.202815	0	0	0	0	0	0
101	conserve-cli-miR-4289-3p	auuuuuugcuagcucgcaccgauccagauccaaaagcuccugcaaacaaagccuuuacuggguucauuguggaagcaaauacucc	auuuuuugcuagcucgcaccgauccagauccaaaagcuccugcaaacaaagccuuuacuggguucauuguggaagcaaauacucc	auuuuuugcuagcucgcaccgauccagauccaaaagcuccugcaaacaaagccuuuacuggguucauuguggaagcaaauacucc	auuuuuugcuagcucgcaccgauccagauccaaaagcuccugcaaacaaagccuuuacuggguucauuguggaagcaaauacucc	auuuuuugcuagcucgcaccgauccagauccaaaagcuccugcaaacaaagccuuuacuggguucauuguggaagcaaauacucc	auuuuuugcuagcucgcaccgauccagauccaaaagcuccugcaaacaaagccuuuacuggguucauuguggaagcaaauacucc	auuuuuugcuagcucgcaccgauccagauccaaaagcuccugcaaacaaagccuuuacuggguucauuguggaagcaaauacucc	auuuuuugcuagcucgcaccgauccagauccaaaagcuccugcaaacaaagccuuuacuggguucauuguggaagcaaauacucc	auuuuuugcuagcucgcaccgauccagauccaaaagcuccugcaaacaaagccuuuacuggguucauuguggaagcaaauacucc	ucauuguggaagcaaauacucc	ucauuguggaagcaaauacucc	ucauuguggaagcaaauacucc	ucauuguggaagcaaauacucc	ucauuguggaagcaaauacucc	ucauuguggaagcaaauacucc	ucauuguggaagcaaauacucc	ucauuguggaagcaaauacucc	ucauuguggaagcaaauacucc	4	0	0	0	0	0	0	0	0	0.485565	0	0	0	0	0	0	0	0
102	conserve-cli-miR-4442-1-5p	accggacagagcgcgccgcgccgccuuggaccuuacaaucugcugcaagccgggaaggcggcuucucuccgcnnn	accggacagagcgcgccgcgccgccuuggaccuuacaaucugcugcaagccgggaaggcggcuucucuccgcnnn	accggacagagcgcgccgcgccgccuuggaccuuacaaucugcugcaagccgggaaggcggcuucucuccgcnnn	accggacagagcgcgccgcgccgccuuggaccuuacaaucugcugcaagccgggaaggcggcuucucuccgcnnn	accggacagagcgcgccgcgccgccuuggaccuuacaaucugcugcaagccgggaaggcggcuucucuccgcnnn	accggacagagcgcgccgcgccgccuuggaccuuacaaucugcugcaagccgggaaggcggcuucucuccgcnnn	accggacagagcgcgccgcgccgccuuggaccuuacaaucugcugcaagccgggaaggcggcuucucuccgcnnn	accggacagagcgcgccgcgccgccuuggaccuuacaaucugcugcaagccgggaaggcggcuucucuccgcnnn	accggacagagcgcgccgcgccgccuuggaccuuacaaucugcugcaagccgggaaggcggcuucucuccgcnnn	accggacagagcgcgccgc	accggacagagcgcgccgc	accggacagagcgcgccgc	accggacagagcgcgccgc	accggacagagcgcgccgc	accggacagagcgcgccgc	accggacagagcgcgccgc	accggacagagcgcgccgc	accggacagagcgcgccgc	0	0	6	0	0	0	0	0	0	0	0	0.608446	0	0	0	0	0	0
103	conserve-cli-miR-4442-5p	accggacagagcgcgccgcgccgccuuggaccuuacaaucugcugcaagccgggaaggcggcuucucuccgcnnn	accggacagagcgcgccgcgccgccuuggaccuuacaaucugcugcaagccgggaaggcggcuucucuccgcnnn	accggacagagcgcgccgcgccgccuuggaccuuacaaucugcugcaagccgggaaggcggcuucucuccgcnnn	accggacagagcgcgccgcgccgccuuggaccuuacaaucugcugcaagccgggaaggcggcuucucuccgcnnn	accggacagagcgcgccgcgccgccuuggaccuuacaaucugcugcaagccgggaaggcggcuucucuccgcnnn	accggacagagcgcgccgcgccgccuuggaccuuacaaucugcugcaagccgggaaggcggcuucucuccgcnnn	accggacagagcgcgccgcgccgccuuggaccuuacaaucugcugcaagccgggaaggcggcuucucuccgcnnn	accggacagagcgcgccgcgccgccuuggaccuuacaaucugcugcaagccgggaaggcggcuucucuccgcnnn	accggacagagcgcgccgcgccgccuuggaccuuacaaucugcugcaagccgggaaggcggcuucucuccgcnnn	accggacagagcgcgccg	accggacagagcgcgccg	accggacagagcgcgccgc	accggacagagcgcgccg	accggacagagcgcgccg	accggacagagcgcgccg	accggacagagcgcgccg	accggacagagcgcgccg	accggacagagcgcgccg	0	0	6	0	0	0	0	0	0	0	0	0.608446	0	0	0	0	0	0
104	conserve-cli-miR-4489-5p	aggggcuacagggguggcaucugugagaagcugcuagaagcuuccccuguguccaacca	aggggcuacagggguggcaucugugagaagcugcuagaagcuuccccuguguccaacc	aggggcuacagggguggcaucugugagaagcugcuagaagcuuccccuguguccaacc	aggggcuacagggguggcaucugugagaagcugcuagaagcuuccccuguguccaacc	aggggcuacagggguggcaucugugagaagcugcuagaagcuuccccuguguccaacc	aggggcuacagggguggcaucugugagaagcugcuagaagcuuccccuguguccaacc	aggggcuacagggguggcaucugugagaagcugcuagaagcuuccccuguguccaacc	aggggcuacagggguggcaucugugagaagcugcuagaagcuuccccuguguccaacc	aggggcuacagggguggcaucugugagaagcugcuagaagcuuccccuguguccaacc	aggggcuacagggguggcaucu	aggggcuacagggguggcaucu	aggggcuacagggguggcaucu	aggggcuacagggguggcaucu	aggggcuacagggguggcaucu	aggggcuacagggguggcaucu	aggggcuacagggguggcaucu	aggggcuacagggguggcaucu	aggggcuacagggguggcaucu	4	3	2	0	0	0	2	0	0	0.485565	0.379893	0.202815	0	0	0	0.211166	0	0
105	conserve-cli-miR-449b-3p	gggaugagcacccauggcuggaaccccccauuuggagucuccagccacagacguucaucuccu	gggaugagcacccauggcuggaaccccccauuuggagucuccagccacagacguucaucuccu	gggaugagcacccauggcuggaaccccccauuuggagucuccagccacagacguucaucuccu	gggaugagcacccauggcuggaaccccccauuuggagucuccagccacagacguucaucuccu	gggaugagcacccauggcuggaaccccccauuuggagucuccagccacagacguucaucuccu	gggggaugagcacccauggcuggaaccccccauuuggagucuccagccacagacguucaucuccuag	gggaugagcacccauggcuggaaccccccauuuggagucuccagccacagacguucaucuccu	gggaugagcacccauggcuggaaccccccauuuggagucuccagccacagacguucaucuccu	gggaugagcacccauggcuggaaccccccauuuggagucuccagccacagacguucaucuccu	cagccacagacguucaucuccu	cagccacagacguucaucuccu	cagccacagacguucaucuccu	cagccacagacguucaucuccu	cagccacagacguucaucuccu	cagccacagacguucaucuccuag	cagccacagacguucaucuccu	cagccacagacguucaucuccu	cagccacagacguucaucuccu	20	0	11	5	21	6	0	0	0	2.42783	0	1.11548	0.602277	2.51328	0.684963	0	0	0
106	conserve-cli-miR-4522-3p	gcagcgugccgggcugggacaggugcucugauguuccucuccugccagugugcgcugcug	ugacucugccuguggcuugcagguguggaagaagaaguuaucugcagcgguggagacagg	ugacucugccuguggcuugcagguguggaagaagaaguuaucugcagcgguggagacagg	ugacucugccuguggcuugcagguguggaagaagaaguuaucugcagcgguggagacagg	ugacucugccuguggcuugcagguguggaagaagaaguuaucugcagcgguggagacagg	gcagcgccuuuguggggagagcgcagcggcggagcag	ugacucugccuguggcuugcagguguggaagaagaaguuaucugcagcgguggagacagg	ugacucugccuguggcuugcagguguggaagaagaaguuaucugcagcgguggagacagg	ugacucugccuguggcuugcagguguggaagaagaaguuaucugcagcgguggagacagg	ucuccugccagugugcgcugcug	gcagcgguggagacagg	gcagcgguggagacagg	gcagcgguggagacagg	gcagcgguggagacagg	agcgcagcggcggagcag	gcagcgguggagacagg	gcagcgguggagacagg	gcagcgguggagacagg	6	0	0	0	0	10	0	0	0	0.728348	0	0	0	0	1.14161	0	0	0
107	conserve-cli-miR-458a-3p	aguaccauucaaagagcuaugacaaugagacuguuuauagcucuggaaauggcgcugc	aguaccauucaaagagcuaugacaaugagacuguuuauagcucuggaaauggcgcugcc	aguaccauucaaagagcuaugacaaugagacuguuuauagcucuggaaauggcgcugcc	aguaccauucaaagagcuaugacaaugagacuguuuauagcucuggaaauggcgcugcc	aguaccauucaaagagcuaugacaaugagacuguuuauagcucuggaaauggcgcugc	aguaccauucaaagagcuaugacaaugagacuguuuauagcucuggaaauggcgcugc	aguaccauucaaagagcuaugacaaugagacuguuuauagcucuggaaauggcgcugcc	aguaccauucaaagagcuaugacaaugagacuguuuauagcucuggaaauggcgcugcc	aguaccauucaaagagcuaugacaaugagacuguuuauagcucuggaaauggcgcugcc	auagcucuggaaauggcgcugc	auagcucuggaaauggcgcugcc	auagcucuggaaauggcgcugcc	auagcucuggaaauggcgcugcc	auagcucuggaaauggcgcugc	auagcucuggaaauggcgcugc	auagcucuggaaauggcgcugcc	auagcucuggaaauggcgcugcc	auagcucuggaaauggcgcugcc	71	7	21	9	13	13	0	0	0	8.61879	0.886416	2.12956	1.0841	1.55584	1.48409	0	0	0
108	conserve-cli-miR-458a-5p	aguaccauucaaagagcuaugacaaugagacuguuuauagcucuggaaauggcgcugc	aguaccauucaaagagcuaugacaaugagacuguuuauagcucuggaaauggcgcugcc	aguaccauucaaagagcuaugacaaugagacuguuuauagcucuggaaauggcgcugcc	aguaccauucaaagagcuaugacaaugagacuguuuauagcucuggaaauggcgcugcc	aguaccauucaaagagcuaugacaaugagacuguuuauagcucuggaaauggcgcugc	aguaccauucaaagagcuaugacaaugagacuguuuauagcucuggaaauggcgcugc	aguaccauucaaagagcuaugacaaugagacuguuuauagcucuggaaauggcgcugcc	aguaccauucaaagagcuaugacaaugagacuguuuauagcucuggaaauggcgcugcc	aguaccauucaaagagcuaugacaaugagacuguuuauagcucuggaaauggcgcugcc	aguaccauucaaagagcuauga	aguaccauucaaagagcuauga	aguaccauucaaagagcuauga	aguaccauucaaagagcuauga	aguaccauucaaagagcuauga	aguaccauucaaagagcuauga	aguaccauucaaagagcuauga	aguaccauucaaagagcuauga	aguaccauucaaagagcuauga	28	4	2	4	5	4	0	0	0	3.39896	0.506524	0.202815	0.481822	0.5984	0.456642	0	0	0
109	conserve-cli-miR-460b-5p	uggcaagcuguguuacugacuccuuguaccuagccugggagcaguagcacagggugcugc	acacgcgccgcugcgcgcgcuagcaguggcucagaagcgcagcgcagcuacgcgggugcug	acacgcgccgcugcgcgcgcuagcaguggcucagaagcgcagcgcagcuacgcgggugcug	acacgcgccgcugcgcgcgcuagcaguggcucagaagcgcagcgcagcuacgcgggugcug	acacgcgccgcugcgcgcgcuagcaguggcucagaagcgcagcgcagcuacgcgggugcug	acacgcgccgcugcgcgcgcuagcaguggcucagaagcgcagcgcagcuacgcgggugcug	acacgcgccgcugcgcgcgcuagcaguggcucagaagcgcagcgcagcuacgcgggugcug	acacgcgccgcugcgcgcgcuagcaguggcucagaagcgcagcgcagcuacgcgggugcug	acacgcgccgcugcgcgcgcuagcaguggcucagaagcgcagcgcagcuacgcgggugcug	uggcaagcuguguuacugacuccu	acacgcgccgcugcgcgcgc	acacgcgccgcugcgcgcgc	acacgcgccgcugcgcgcgc	acacgcgccgcugcgcgcgc	acacgcgccgcugcgcgcgc	acacgcgccgcugcgcgcgc	acacgcgccgcugcgcgcgc	acacgcgccgcugcgcgcgc	40	0	0	0	0	0	0	0	0	4.85565	0	0	0	0	0	0	0	0
110	conserve-cli-miR-4638-3p	ggcggggcagcugggacagccugcaggaccccaacgacaggcuggacagcaucuccgucgg	ggcggggcagcugggacagccugcaggaccccaacgacaggcuggacagcaucuccgucgg	ggcggggcagcugggacagccugcaggaccccaacgacaggcuggacagcaucuccgucgg	ggcggggcagcugggacagccugcaggaccccaacgacaggcuggacagcaucuccgucgg	ggcggggcagcugggacagccugcaggaccccaacgacaggcuggacagcaucuccgucgg	ggcggggcagcugggacagccugcaggaccccaacgacaggcuggacagcaucuccgucgg	ggcggggcagcugggacagccugcaggaccccaacgacaggcuggacagcaucuccgucgg	ggcggggcagcugggacagccugcaggaccccaacgacaggcuggacagcaucuccgucgg	ggcggggcagcugggacagccugcaggaccccaacgacaggcuggacagcaucuccgucgg	gcuggacagcaucuccgucgg	gcuggacagcaucuccgucgg	gcuggacagcaucuccgucgg	gcuggacagcaucuccgucgg	gcuggacagcaucuccgucgg	gcuggacagcaucuccgucgg	gcuggacagcaucuccgucgg	gcuggacagcaucuccgucgg	gcuggacagcaucuccgucgg	3	0	0	0	0	6	0	0	0	0.364174	0	0	0	0	0.684963	0	0	0
111	conserve-cli-miR-4677-3p	aguuuuuuugggaguacguugguauccucaaagcguacgauguucuuccaaaugagcucu	aguuuuuuugggaguacguugguauccucaaagcguacgauguucuuccaaaugagcucu	aguuuuuuugggaguacguugguauccucaaagcguacgauguucuuccaaaugagcucu	aguuuuuuugggaguacguugguauccucaaagcguacgauguucuuccaaaugagcucu	aguuuuuuugggaguacguugguauccucaaagcguacgauguucuuccaaaugagcucu	aguuuuuuugggaguacguugguauccucaaagcguacgauguucuuccaaaugagcucu	aguuuuuuugggaguacguugguauccucaaagcguacgauguucuuccaaaugagcucu	aguuuuuuugggaguacguugguauccucaaagcguacgauguucuuccaaaugagcucu	aguuuuuuugggaguacguugguauccucaaagcguacgauguucuuccaaaugagcucu	auguucuuccaaaugagcucu	gauguucuuccaaaugagcucu	auguucuuccaaaugagcucu	auguucuuccaaaugagcucu	auguucuuccaaaugagcucu	auguucuuccaaaugagcucu	auguucuuccaaaugagcucu	auguucuuccaaaugagcucu	auguucuuccaaaugagcucu	6	4	3	0	0	2	0	0	0	0.728348	0.506524	0.304223	0	0	0.228321	0	0	0
112	conserve-cli-miR-4691-5p	uuccuccaucugucaugcucaguguauuacaugacuggucacugacagauaagagagcc	uuccuccaucugucaugcucaguguauuacaugacuggucacugacagauaagagagcc	uuccuccaucugucaugcucaguguauuacaugacuggucacugacagauaagagagcc	uuccuccaucugucaugcucaguguauuacaugacuggucacugacagauaagagagc	uuccuccaucugucaugcucaguguauuacaugacuggucacugacagauaagagagcc	uuccuccaucugucaugcucaguguauuacaugacuggucacugacagauaagagagcc	uuccuccaucugucaugcucaguguauuacaugacuggucacugacagauaagagagcc	uuccuccaucugucaugcucaguguauuacaugacuggucacugacagauaagagagcc	uuccuccaucugucaugcucaguguauuacaugacuggucacugacagauaagagagcc	uuccuccaucugucaugcucagu	uuccuccaucugucaugcucagu	uuccuccaucugucaugcucagu	uuccuccaucugucaugcucag	uuccuccaucugucaugcucagu	uuccuccaucugucaugcucagu	uuccuccaucugucaugcucagu	uuccuccaucugucaugcucagu	uuccuccaucugucaugcucag	0	5	0	4	7	0	0	0	3	0	0.633155	0	0.481822	0.83776	0	0	0	0.270327
113	conserve-cli-miR-4707-3p	cccccggccccgcguccgcgaucuccagccgcagggcguugcggguggcggugacc	cccccggccccgcguccgcgaucuccagccgcagggcguugcggguggcggugacc	cccccggccccgcguccgcgaucuccagccgcagggcguugcggguggcggugacc	cccccggccccgcguccgcgaucuccagccgcagggcguugcggguggcggugacc	cccccggccccgcguccgcgaucuccagccgcagggcguugcggguggcggugacc	ggcagcgcagcuucggcgagaacuacgugaguggugccaccccggccccgcguccuccg	cccccggccccgcguccgcgaucuccagccgcagggcguugcggguggcggugacc	cccccggccccgcguccgcgaucuccagccgcagggcguugcggguggcggugacc	cccccggccccgcguccgcgaucuccagccgcagggcguugcggguggcggugacc	gggcguugcggguggcggugacc	gggcguugcggguggcggugacc	gggcguugcggguggcggugacc	gggcguugcggguggcggugacc	gggcguugcggguggcggugacc	ccccggccccgcguccuccg	ggcguugcggguggcggugacc	gggcguugcggguggcggugacc	gggcguugcggguggcggugacc	0	0	0	0	0	47	0	0	0	0	0	0	0	0	5.36554	0	0	0
114	conserve-cli-miR-4707-5p	cccccggccccgcguccgcgaucuccagccgcagggcguugcggguggcggugacc	cccccggccccgcguccgcgaucuccagccgcagggcguugcggguggcggugacc	cccccggccccgcguccgcgaucuccagccgcagggcguugcggguggcggugacc	cccccggccccgcguccgcgaucuccagccgcagggcguugcggguggcggugacc	cccccggccccgcguccgcgaucuccagccgcagggcguugcggguggcggugacc	ggcagcgcagcuucggcgagaacuacgugaguggugccaccccggccccgcguccuccg	cccccggccccgcguccgcgaucuccagccgcagggcguugcggguggcggugacc	cccccggccccgcguccgcgaucuccagccgcagggcguugcggguggcggugacc	cccccggccccgcguccgcgaucuccagccgcagggcguugcggguggcggugacc	cccccggccccgcguccgc	cccccggccccgcguccgc	cccccggccccgcguccgc	cccccggccccgcguccgc	cccccggccccgcguccgc	ggcagcgcagcuucggcg	cccccggccccgcguccg	cccccggccccgcguccgc	cccccggccccgcguccgc	0	0	0	0	0	0	9	0	0	0	0	0	0	0	0	0.950245	0	0
115	conserve-cli-miR-4727-5p	uuagugggaguucaaguagacaaaaugcuaagcugagggucccuugagc	uuagugggaguucaaguagacaaaaugcuaagcugagggucccuugagc	uuagugggaguucaaguagacaaaaugcuaagcugagggucccuugagc	uuagugggaguucaaguagacaaaaugcuaagcugagggucccuugagc	uuagugggaguucaaguagacaaaaugcuaagcugagggucccuugagc	uuagugggaguucaaguagacaaaaugcuaagcugagggucccuugagc	uuagugggaguucaaguagacaaaaugcuaagcugagggucccuugagc	uuagugggaguucaaguagacaaaaugcuaagcugagggucccuugagc	uuagugggaguucaaguagacaaaaugcuaagcugagggucccuugagc	uuagugggaguucaaguaga	uuagugggaguucaaguaga	uuagugggaguucaaguaga	uuagugggaguucaaguaga	uuagugggaguucaaguaga	uuagugggaguucaaguaga	uuagugggaguucaaguaga	uuagugggaguucaaguaga	uuagugggaguucaaguaga	0	0	0	0	0	0	3	0	0	0	0	0	0	0	0	0.316748	0	0
116	conserve-cli-miR-4760-5p	auuagauugcaauuaggcaugucuaaaucuaugaaugacaugccuaauugcaaucuaauuu	auuagauugcaauuaggcaugucuaaaucuaugaaugacaugccuaauugcaaucuaauuu	auuagauugcaauuaggcaugucuaaaucuaugaaugacaugccuaauugcaaucuaauuu	auuagauugcaauuaggcaugucuaaaucuaugaaugacaugccuaauugcaaucuaauuu	auuagauugcaauuaggcaugucuaaaucuaugaaugacaugccuaauugcaaucuaauuu	auuagauugcaauuaggcaugucuaaaucuaugaaugacaugccuaauugcaaucuaauuu	auuagauugcaauuaggcaugucuaaaucuaugaaugacaugccuaauugcaaucuaauuu	auuagauugcaauuaggcaugucuaaaucuaugaaugacaugccuaauugcaaucuaauuu	auuagauugcaauuaggcaugucuaaaucuaugaaugacaugccuaauugcaaucuaauuu	auuagauugcaauuaggcauguc	auuagauugcaauuaggcauguc	auuagauugcaauuaggcauguc	auuagauugcaauuaggcauguc	auuagauugcaauuaggcauguc	auuagauugcaauuaggcauguc	auuagauugcaauuaggcauguc	auuagauugcaauuaggcauguc	auuagauugcaauuaggcauguc	0	0	0	0	0	0	0	2	0	0	0	0	0	0	0	0	0.223936	0
117	conserve-cli-miR-4776-3p	ugcagauuaucugggcaaaaaaggauggauuuaauucauuuuggaccagauaaucugcguu	ugcagauuaucugggcaaaaaaggauggauuuaauucauuuuggaccagauaaucugcguu	ugcagauuaucugggcaaaaaaggauggauuuaauucauuuuggaccagauaaucugcguu	ugcagauuaucugggcaaaaaaggauggauuuaauucauuuuggaccagauaaucugcguu	ugcagauuaucugggcaaaaaaggauggauuuaauucauuuuggaccagauaaucugcguu	ugcagauuaucugggcaaaaaaggauggauuuaauucauuuuggaccagauaaucugcguu	ugcagauuaucugggcaaaaaaggauggauuuaauucauuuuggaccagauaaucugcguu	ugcagauuaucugggcaaaaaaggauggauuuaauucauuuuggaccagauaaucugcguu	ugcagauuaucugggcaaaaaaggauggauuuaauucauuuuggaccagauaaucugcguu	uuggaccagauaaucugcguu	uuggaccagauaaucugcguu	uuggaccagauaaucugcguu	uuggaccagauaaucugcguu	uuggaccagauaaucugcguu	uuggaccagauaaucugcguu	uuggaccagauaaucugcguu	uuggaccagauaaucugcguu	uuggaccagauaaucugcguu	0	0	4	0	0	0	0	0	0	0	0	0.40563	0	0	0	0	0	0
118	conserve-cli-miR-4786-3p	gagaggguuggccaagcugucucuuccuaccauaguguggucuggaaguggcagaagccaauuguggaac	gagaggguuggccaagcugucucuuccuaccauaguguggucuggaaguggcagaagccaauuguggaac	ucucuggcgguccugugucugccaggugaccucccuggaacagggacuggccagagcug	gagaggguuggccaagcugucucuuccuaccauaguguggucuggaaguggcagaagccaauuguggaac	gagaggguuggccaagcugucucuuccuaccauaguguggucuggaaguggcagaagccaauuguggaac	gagaggguuggccaagcugucucuuccuaccauaguguggucuggaaguggcagaagccaauuguggaac	gagaggguuggccaagcugucucuuccuaccauaguguggucuggaaguggcagaagccaauuguggaac	gagaggguuggccaagcugucucuuccuaccauaguguggucuggaaguggcagaagccaauuguggaac	gagaggguuggccaagcugucucuuccuaccauaguguggucuggaaguggcagaagccaauuguggaac	agaagccaauuguggaac	agaagccaauuguggaac	gaacagggacuggccagagcug	agaagccaauuguggaac	agaagccaauuguggaac	agaagccaauuguggaac	agaagccaauuguggaac	agaagccaauuguggaac	agaagccaauuguggaac	0	0	2	0	0	0	0	0	0	0	0	0.202815	0	0	0	0	0	0
119	conserve-cli-miR-4999-3p	ugcuguauaaugaugcugagcagugcuguaugaugaugcugagcacugcuguacgaugcuauauggugcu	ugcuguauaaugaugcugagcagugcuguaugaugaugcugagcacugcuguacgaugcuauauggugcu	cuguacgaugaugcugcgccaugcuaugugauugauuacacgguguagugcuguauaaugaugcugagca	ugcuguauaaugaugcugagcagugcuguaugaugaugcugagcacugcuguacgaugcuauauggugcu	ugcuguauaaugaugcugagcagugcuguaugaugaugcugagcacugcuguacgaugcuauauggugcu	ugcuguauaaugaugcugagcagugcuguaugaugaugcugagcacugcuguacgaugcuauauggugcu	ugcuguauaaugaugcugagcagugcuguaugaugaugcugagcacugcuguacgaugcuauauggugcu	ugcuguauaaugaugcugagcagugcuguaugaugaugcugagcacugcuguacgaugcuauauggugcu	ugcuguauaaugaugcugagcagugcuguaugaugaugcugagcacugcuguacgaugcuauauggugcu	cuguacgaugcuauauggugcu	cuguacgaugcuauauggugcu	ugcuguauaaugaugcugagca	cuguacgaugcuauauggugcu	cuguacgaugcuauauggugcu	cuguacgaugcuauauggugcu	cuguacgaugcuauauggugcu	cuguacgaugcuauauggugcu	cuguacgaugcuauauggugcu	0	0	7	0	0	0	0	0	0	0	0	0.709853	0	0	0	0	0	0
120	conserve-cli-miR-502b-3p	aucucagccucuaaugggaagaucugcaagauuucuuccaccucaagcugagaucu	aucucagccucuaaugggaagaucugcaagauuucuuccaccucaagcugagaucu	aucucagccucuaaugggaagaucugcaagauuucuuccaccucaagcugagaucu	aucucagccucuaaugggaagaucugcaagauuucuuccaccucaagcugagaucu	aucucagccucuaaugggaagaucugcaagauuucuuccaccucaagcugagaucu	aucucagccucuaaugggaagaucugcaagauuucuuccaccucaagcugagaucu	aucucagccucuaaugggaagaucugcaagauuucuuccaccucaagcugagaucu	aucucagccucuaaugggaagaucugcaagauuucuuccaccucaagcugagaucu	aucucagccucuaaugggaagaucugcaagauuucuuccaccucaagcugagaucu	uuccaccucaagcugagaucu	uuccaccucaagcugagaucu	uuccaccucaagcugagaucu	uuccaccucaagcugagaucu	uuccaccucaagcugagaucu	uuccaccucaagcugagaucu	uuccaccucaagcugagaucu	uuccaccucaagcugagaucu	uuccaccucaagcugagaucu	26	0	5	0	0	7	0	0	0	3.15617	0	0.507038	0	0	0.799124	0	0	0
121	conserve-cli-miR-502b-5p	aucucagccucuaaugggaagaucugcaagauuucuuccaccucaagcugagaucu	aucucagccucuaaugggaagaucugcaagauuucuuccaccucaagcugagaucu	aucucagccucuaaugggaagaucugcaagauuucuuccaccucaagcugagaucu	aucucagccucuaaugggaagaucugcaagauuucuuccaccucaagcugagaucu	aucucagccucuaaugggaagaucugcaagauuucuuccaccucaagcugagaucu	aucucagccucuaaugggaagaucugcaagauuucuuccaccucaagcugagaucu	aucucagccucuaaugggaagaucugcaagauuucuuccaccucaagcugagaucu	aucucagccucuaaugggaagaucugcaagauuucuuccaccucaagcugagaucu	aucucagccucuaaugggaagaucugcaagauuucuuccaccucaagcugagaucu	aucucagccucuaaugggaaga	aucucagccucuaaugggaaga	aucucagccucuaaugggaaga	aucucagccucuaaugggaaga	aucucagccucuaaugggaaga	aucucagccucuaaugggaaga	aucucagccucuaaugggaaga	aucucagccucuaaugggaaga	aucucagccucuaaugggaaga	6	0	2	0	0	1	0	0	0	0.728348	0	0.202815	0	0	0.114161	0	0	0
122	conserve-cli-miR-507-1-3p	ccggugucaucaggugucuaggcacugagacugguccugugcuuugcacuuggaaacacgggc	ccggugucaucaggugucuaggcacugagacugguccugugcuuugcacuuggaaacacgggc	ccggugucaucaggugucuaggcacugagacugguccugugcuuugcacuuggaaacacgggc	ccggugucaucaggugucuaggcacugagacugguccugugcuuugcacuuggaaacacgggc	ccggugucaucaggugucuaggcacugagacugguccugugcuuugcacuuggaaacacgggc	ccggugucaucaggugucuaggcacugagacugguccugugcuuugcacuuggaaacacgggc	ccggugucaucaggugucuaggcacugagacugguccugugcuuugcacuuggaaacacgggc	ccggugucaucaggugucuaggcacugagacugguccugugcuuugcacuuggaaacacgggc	ccggugucaucaggugucuaggcacugagacugguccugugcuuugcacuuggaaacacgggc	cuuugcacuuggaaacacgggc	cuuugcacuuggaaacacgggc	cuuugcacuuggaaacacgggc	cuuugcacuuggaaacacgggc	cuuugcacuuggaaacacgggc	cuuugcacuuggaaacacgggc	cuuugcacuuggaaacacgggc	cuuugcacuuggaaacacgggc	cuuugcacuuggaaacacgggc	0	0	4	0	0	0	0	0	0	0	0	0.40563	0	0	0	0	0	0
123	conserve-cli-miR-507a-5p	uaugauuggccugggcugugagugaacacugcuggcucauguccagcuuuucauaca	uaugauuggccugggcugugagugaacacugcuggcucauguccagcuuuucauaca	ugcugagaaacauggaaugugucuaaauuaagaauaaaaacaucccaugcuuuucaguaca	uaugauuggccugggcugugagugaacacugcuggcucauguccagcuuuucauaca	uaugauuggccugggcugugagugaacacugcuggcucauguccagcuuuucauaca	uaugauuggccugggcugugagugaacacugcuggcucauguccagcuuuucauaca	uaugauuggccugggcugugagugaacacugcuggcucauguccagcuuuucauaca	uaugauuggccugggcugugagugaacacugcuggcucauguccagcuuuucauaca	uaugauuggccugggcugugagugaacacugcuggcucauguccagcuuuucauaca	uaugauuggccugggcugugagu	uaugauuggccugggcugugagu	ugcugagaaacauggaaugugu	uaugauuggccugggcugugagu	uaugauuggccugggcugugagu	uaugauuggccugggcugugagu	uaugauuggccugggcugugagu	uaugauuggccugggcugugagu	uaugauuggccugggcugugagu	0	0	5	0	0	0	0	0	0	0	0	0.507038	0	0	0	0	0	0
124	conserve-cli-miR-5114-3p	cuuuugcccugccuaaauuuuaucccugguggauauaucuggagagugguaucuggcu	cuuuugcccugccuaaauuuuaucccugguggauauaucuggagagugguaucuggcu	gcuuuugcccugccuaaauuuuaucccugguggauauaucuggagagugguaucuggcug	cuuuugcccugccuaaauuuuaucccugguggauauaucuggagagugguaucuggcu	cuuuugcccugccuaaauuuuaucccugguggauauaucuggagagugguaucuggcu	cuuuugcccugccuaaauuuuaucccugguggauauaucuggagagugguaucuggcu	cuuuugcccugccuaaauuuuaucccugguggauauaucuggagagugguaucuggcu	cuuuugcccugccuaaauuuuaucccugguggauauaucuggagagugguaucuggcu	cuuuugcccugccuaaauuuuaucccugguggauauaucuggagagugguaucuggcu	ucuggagagugguaucuggcu	ucuggagagugguaucuggcu	ucuggagagugguaucuggcug	ucuggagagugguaucuggcu	ucuggagagugguaucuggcu	ucuggagagugguaucuggcu	ucuggagagugguaucuggcu	ucuggagagugguaucuggcu	ucuggagagugguaucuggcu	0	0	5	0	0	0	0	0	0	0	0	0.507038	0	0	0	0	0	0
125	conserve-cli-miR-516a-3p	gaugagaggugugggagggcagggauaagaaaucuccccugcuuccuguuacaccucucuguc	gaugagaggugugggagggcagggauaagaaaucuccccugcuuccuguuacaccucucuguc	ugagaggugugggagggcagggauaagaaaucuccccugcuuccuguuacaccucucuguc	gaugagaggugugggagggcagggauaagaaaucuccccugcuuccuguuacaccucucuguc	gaugagaggugugggagggcagggauaagaaaucuccccugcuuccuguuacaccucucuguc	gaugagaggugugggagggcagggauaagaaaucuccccugcuuccuguuacaccucucuguc	gaugagaggugugggagggcagggauaagaaaucuccccugcuuccuguuacaccucucuguc	gaugagaggugugggagggcagggauaagaaaucuccccugcuuccuguuacaccucucuguc	gaugagaggugugggagggcagggauaagaaaucuccccugcuuccuguuacaccucucuguc	ugcuuccuguuacaccucucuguc	ugcuuccuguuacaccucucuguc	ugcuuccuguuacaccucucuguc	ugcuuccuguuacaccucucuguc	ugcuuccuguuacaccucucuguc	ugcuuccuguuacaccucucuguc	ugcuuccuguuacaccucucuguc	ugcuuccuguuacaccucucuguc	ugcuuccuguuacaccucucuguc	0	0	2	0	0	0	0	0	0	0	0	0.202815	0	0	0	0	0	0
126	conserve-cli-miR-548b-1-3p	cagaacaagaaccggcucuguucuggugcgggacugggcugccagaacaagaaccggcucuguucuggu	cagaacaagaaccggcucuguucuggugcgggacugggcugccagaacaagaaccggcucuguucuggu	cagaacaagaaccggcucuguucuggugcgggacugggcugccagaacaagaaccggcucuguucuggu	cagaacaagaaccggcucuguucuggugcgggacugggcugccagaacaagaaccggcucuguucuggu	cagaacaagaaccggcucuguucuggugcgggacugggcugccagaacaagaaccggcucuguucuggu	cagaacaagaaccggcucuguucuggugcgggacugggcugccagaacaagaaccggcucuguucuggu	cagaacaagaaccggcucuguucuggugcgggacugggcugccagaacaagaaccggcucuguucuggu	cagaacaagaaccggcucuguucuggugcgggacugggcugccagaacaagaaccggcucuguucuggu	cagaacaagaaccggcucuguucuggugcgggacugggcugccagaacaagaaccggcucuguucuggu	caagaaccggcucuguucuggu	caagaaccggcucuguucuggu	caagaaccggcucuguucuggu	caagaaccggcucuguucuggu	caagaaccggcucuguucuggu	caagaaccggcucuguucuggu	caagaaccggcucuguucuggu	caagaaccggcucuguucuggu	caagaaccggcucuguucuggu	0	0	39	0	0	31	0	0	40	0	0	3.9549	0	0	3.53898	0	0	3.60436
127	conserve-cli-miR-5589-3p	ugcacaugauuuugguaacugagguaauuaaguuacacaauucagcugcaca	ugcacaugauuuugguaacugagguaauuaaguuacacaauucagcugcaca	uaccaaaauugugugcagauuuacaguguuucugcacaugauuuugguaacug	ugcacaugauuuugguaacugagguaauuaaguuacacaauucagcugcaca	ugcacaugauuuugguaacugagguaauuaaguuacacaauucagcugcaca	ugcacaugauuuugguaacugagguaauuaaguuacacaauucagcugcaca	ugcacaugauuuugguaacugagguaauuaaguuacacaauucagcugcaca	ugcacaugauuuugguaacugagguaauuaaguuacacaauucagcugcaca	ugcacaugauuuugguaacugagguaauuaaguuacacaauucagcugcaca	guuacacaauucagcugcaca	guuacacaauucagcugcaca	ugcacaugauuuugguaacug	guuacacaauucagcugcaca	guuacacaauucagcugcaca	guuacacaauucagcugcaca	guuacacaauucagcugcaca	guuacacaauucagcugcaca	guuacacaauucagcugcaca	0	0	98	0	0	0	0	0	0	0	0	9.93795	0	0	0	0	0	0
128	conserve-cli-miR-5589-5p	ugcacaugauuuugguaacugagguaauuaaguuacacaauucagcugcaca	ugcacaugauuuugguaacugagguaauuaaguuacacaauucagcugcaca	uaccaaaauugugugcagauuuacaguguuucugcacaugauuuugguaacug	ugcacaugauuuugguaacugagguaauuaaguuacacaauucagcugcaca	ugcacaugauuuugguaacugagguaauuaaguuacacaauucagcugcaca	ugcacaugauuuugguaacugagguaauuaaguuacacaauucagcugcaca	ugcacaugauuuugguaacugagguaauuaaguuacacaauucagcugcaca	ugcacaugauuuugguaacugagguaauuaaguuacacaauucagcugcaca	ugcacaugauuuugguaacugagguaauuaaguuacacaauucagcugcaca	ugcacaugauuuugguaacug	ugcacaugauuuugguaacug	uaccaaaauugugugcagauuu	ugcacaugauuuugguaacug	ugcacaugauuuugguaacug	ugcacaugauuuugguaacug	ugcacaugauuuugguaacug	ugcacaugauuuugguaacug	ugcacaugauuuugguaacug	161	145	1	104	108	84	264	121	132	19.544	18.3615	0.101408	12.5274	12.9254	9.58948	27.8739	13.5481	11.8944
129	conserve-cli-miR-5705-3p	uuccggaaauugccgaagcgagucgaacgggauuccauuccuguuucggcuuuuuccggcgacu	auuccggaaauugccgaagcgagucgaacgggauuccauuccuguuucggcuuuuuccggcgac	auuccggaaauugccgaagcgagucgaacgggauuccauuccuguuucggcuuuuuccggcgacu	uuccggaaauugccgaagcgagucgaacgggauuccauuccuguuucggcuuuuuccggcgac	cgcugcggcucuuucuccggaaauugccgaauagguuuugaacgccagucuuuucugccucggcaaauuccggaaauugccgaagcgag	uuccggaaauugccgaagcgagucgaacgggauuccauuccuguuucggcuuuuuccggcgacu	cgcugcggcucuuucuccggaaauugccgaauagguuuugaacgccagucuuuucugccucggcaaauuccggaaauugccgaagcgag	uuccggaaauugccgaagcgagucgaacgggauuccauuccuguuucggcuuuuuccggcgacu	uuccggaaauugccgaagcgagucgaacgggauuccauuccuguuucggcuuuuuccggcgacu	uguuucggcuuuuuccggcgacu	uguuucggcuuuuuccggcgac	uguuucggcuuuuuccggcgacu	uguuucggcuuuuuccggcgac	auuccggaaauugccgaagcgag	uguuucggcuuuuuccggcgacu	uuccggaaauugccgaagcgag	uguuucggcuuuuuccggcgacu	uguuucggcuuuuuccggcgacu	29	24	15	19	25	15	13	0	10	3.52035	3.03914	1.52111	2.28865	2.992	1.71241	1.37258	0	0.901089
130	conserve-cli-miR-5705-5p	uuccggaaauugccgaagcgagucgaacgggauuccauuccuguuucggcuuuuuccggcgacu	auuccggaaauugccgaagcgagucgaacgggauuccauuccuguuucggcuuuuuccggcgac	auuccggaaauugccgaagcgagucgaacgggauuccauuccuguuucggcuuuuuccggcgacu	uuccggaaauugccgaagcgagucgaacgggauuccauuccuguuucggcuuuuuccggcgac	cgcugcggcucuuucuccggaaauugccgaauagguuuugaacgccagucuuuucugccucggcaaauuccggaaauugccgaagcgag	uuccggaaauugccgaagcgagucgaacgggauuccauuccuguuucggcuuuuuccggcgacu	cgcugcggcucuuucuccggaaauugccgaauagguuuugaacgccagucuuuucugccucggcaaauuccggaaauugccgaagcgag	uuccggaaauugccgaagcgagucgaacgggauuccauuccuguuucggcuuuuuccggcgacu	uuccggaaauugccgaagcgagucgaacgggauuccauuccuguuucggcuuuuuccggcgacu	uuccggaaauugccgaagcgagu	auuccggaaauugccgaagcgag	auuccggaaauugccgaagcgag	uuccggaaauugccgaagcgagu	cgcugcggcucuuucuccggaaauu	uuccggaaauugccgaagcgagu	cgcugcggcucuuucuccggaaau	uuccggaaauugccgaagcgagu	uuccggaaauugccgaagcgagu	22	11	9	12	0	17	0	0	13	2.67061	1.39294	0.912668	1.44547	0	1.94073	0	0	1.17142
131	conserve-cli-miR-576-3p	agcucugaguugacauuagacagacugcacugaacuuucuaaugaucucagagugau	agcucugaguugacauuagacagacugcacugaacuuucuaaugaucucagagugau	agcucugaguugacauuagacagacugcacugaacuuucuaaugaucucagagugau	agcucugaguugacauuagacagacugcacugaacuuucuaaugaucucagagugau	agcucugaguugacauuagacagacugcacugaacuuucuaaugaucucagagugau	agcucugaguugacauuagacagacugcacugaacuuucuaaugaucucagagugau	agcucugaguugacauuagacagacugcacugaacuuucuaaugaucucagagugau	agcucugaguugacauuagacagacugcacugaacuuucuaaugaucucagagugau	agcucugaguugacauuagacagacugcacugaacuuucuaaugaucucagagugau	uuucuaaugaucucagagugau	uuucuaaugaucucagagugau	uuucuaaugaucucagagugau	uuucuaaugaucucagagugau	uuucuaaugaucucagagugau	uuucuaaugaucucagagugau	uuucuaaugaucucagagugau	uuucuaaugaucucagagugau	uuucuaaugaucucagagugau	0	0	0	0	3	0	0	0	0	0	0	0	0	0.35904	0	0	0	0
132	conserve-cli-miR-589-1-3p	uguuaaauucuuugggacucaguguaacuguguuaaauugagaaccgaagacuuuaacaug	uguuaaauucuuugggacucaguguaacuguguuaaauugagaaccgaagacuuuaacaug	uguuaaauucuuugggacucaguguaacuguguuaaauugagaaccgaagacuuuaacaug	uguuaaauucuuugggacucaguguaacuguguuaaauugagaaccgaagacuuuaacaug	uguuaaauucuuugggacucaguguaacuguguuaaauugagaaccgaagacuuuaacaug	uguuaaauucuuugggacucaguguaacuguguuaaauugagaaccgaagacuuuaacaug	uguuaaauucuuugggacucaguguaacuguguuaaauugagaaccgaagacuuuaacaug	uguuaaauucuuugggacucaguguaacuguguuaaauugagaaccgaagacuuuaacaug	uguuaaauucuuugggacucaguguaacuguguuaaauugagaaccgaagacuuuaacaug	ugagaaccgaagacuuuaacaug	ugagaaccgaagacuuuaacaug	ugagaaccgaagacuuuaacaug	ugagaaccgaagacuuuaacaug	ugagaaccgaagacuuuaacaug	ugagaaccgaagacuuuaacaug	ugagaaccgaagacuuuaacaug	ugagaaccgaagacuuuaacaug	ugagaaccgaagacuuuaacaug	0	0	0	6	0	0	0	0	0	0	0	0	0.722733	0	0	0	0	0
133	conserve-cli-miR-605-3p	augaguuucaccucucugcucccaaacaguguuggaucagggagggauccucgcac	ggaaggcaaaaggaccugcccagccuagcagguucucugcugcucc	ggaaggcaaaaggaccugcccagccuagcagguucucugcugcucc	ggaaggcaaaaggaccugcccagccuagcagguucucugcugcucc	ggaaggcaaaaggaccugcccagccuagcagguucucugcugcucc	ggaaggcaaaaggaccugcccagccuagcagguucucugcugcucc	ggaaggcaaaaggaccugcccagccuagcagguucucugcugcucc	ggaaggcaaaaggaccugcccagccuagcagguucucugcugcucc	ggaaggcaaaaggaccugcccagccuagcagguucucugcugcucc	aucagggagggauccucgcac	cagguucucugcugcucc	cagguucucugcugcucc	cagguucucugcugcucc	cagguucucugcugcucc	cagguucucugcugcucc	cagguucucugcugcucc	cagguucucugcugcucc	cagguucucugcugcucc	6	0	0	0	0	0	0	0	0	0.728348	0	0	0	0	0	0	0	0
134	conserve-cli-miR-6077-5p	guggaagagcauuugacugagccaguucuuuugccuccucau	guggaagagcauuugacugagccaguucuuuugccuccucau	uggaagagcauuugacugagccaguucuuuugccuccuca	uggaagagcauuugacugagccaguucuuuugccuccuca	uggaagagcauuugacugagccaguucuuuugccuccuca	uggaagagcauuugacugagccaguucuuuugccuccuca	uggaagagcauuugacugagccaguucuuuugccuccuca	uggaagagcauuugacugagccaguucuuuugccuccuca	uggaagagcauuugacugagccaguucuuuugccuccuca	guggaagagcauuugacu	guggaagagcauuugacu	uggaagagcauuugacu	uggaagagcauuugacu	uggaagagcauuugacu	uggaagagcauuugacu	uggaagagcauuugacu	uggaagagcauuugacu	uggaagagcauuugacu	122	67	0	0	0	0	0	0	0	14.8097	8.48427	0	0	0	0	0	0	0
135	conserve-cli-miR-632-5p	cugucugcacacagccugggcuggcaauccgagagcucagguuuugguuaaacacau	cugucugcacacagccugggcuggcaauccgagagcucagguuuugguuaaacacau	cugucugcacacagccugggcuggcaauccgagagcucagguuuugguuaaacacau	cugucugcacacagccugggcuggcaauccgagagcucagguuuugguuaaacacau	cugucugcacacagccugggcuggcaauccgagagcucagguuuugguuaaacacau	cugucugcacacagccugggcuggcaauccgagagcucagguuuugguuaaacacau	cugucugcacacagccugggcuggcaauccgagagcucagguuuugguuaaacacau	cugucugcacacagccugggcuggcaauccgagagcucagguuuugguuaaacacau	cugucugcacacagccugggcuggcaauccgagagcucagguuuugguuaaacacau	cugucugcacacagccugggcu	cugucugcacacagccugggcu	cugucugcacacagccugggcu	cugucugcacacagccugggcu	cugucugcacacagccugggcu	cugucugcacacagccugggcu	cugucugcacacagccugggcu	cugucugcacacagccugggcu	cugucugcacacagccugggcu	4	0	0	0	0	0	0	0	0	0.485565	0	0	0	0	0	0	0	0
136	conserve-cli-miR-6356-5p	uccccagaccucgcagugcuggcaggagcauuggaccagaacugcaauccacugcuucaucugaggugcaggcugggnnnn	uccccagaccucgcagugcuggcaggagcauuggaccagaacugcaauccacugcuucaucugaggugcaggcugggnnnn	uccccagaccucgcagugcuggcaggagcauuggaccagaacugcaauccacugcuucaucugaggugcaggcugggnnnn	uccccagaccucgcagugcuggcaggagcauuggaccagaacugcaauccacugcuucaucugaggugcaggcugggnnnn	uccccagaccucgcagugcuggcaggagcauuggaccagaacugcaauccacugcuucaucugaggugcaggcugggnnnn	uccccagaccucgcagugcuggcaggagcauuggaccagaacugcaauccacugcuucaucugaggugcaggcugggnnnn	uccccagaccucgcagugcuggcaggagcauuggaccagaacugcaauccacugcuucaucugaggugcaggcugggnnnn	uccccagaccucgcagugcuggcaggagcauuggaccagaacugcaauccacugcuucaucugaggugcaggcugggnnnn	uccccagaccucgcagugcuggcaggagcauuggaccagaacugcaauccacugcuucaucugaggugcaggcugggnnnn	uccccagaccucgcagugcugg	uccccagaccucgcagugcug	uccccagaccucgcagugcugg	uccccagaccucgcagugcug	uccccagaccucgcagugcug	uccccagaccucgcagugcugg	uccccagaccucgcagugcug	uccccagaccucgcagugcug	uccccagaccucgcagugcug	77	139	16	0	0	9	0	0	0	9.34713	17.6017	1.62252	0	0	1.02744	0	0	0
137	conserve-cli-miR-639-3p	gcagcgccuuuguggggagagcgcagcggcggagcag	gcagcgccuuuguggggagagcgcagcggcggagcag	gcagcgccuuuguggggagagcgcagcggcggagcag	gcagcgccuuuguggggagagcgcagcggcggagcag	gcagcgccuuuguggggagagcgcagcggcggagcag	gcagcgccuuuguggggagagcgcagcggcggagcag	gcagcgccuuuguggggagagcgcagcggcggagcag	gcagcgccuuuguggggagagcgcagcggcggagcag	gcagcgccuuuguggggagagcgcagcggcggagcag	agcgcagcggcggagcag	agcgcagcggcggagcag	agcgcagcggcggagcag	agcgcagcggcggagcag	agcgcagcggcggagcag	agcgcagcggcggagcag	agcgcagcggcggagcag	agcgcagcggcggagcag	agcgcagcggcggagcag	0	0	0	0	0	10	0	0	0	0	0	0	0	0	1.14161	0	0	0
138	conserve-cli-miR-6408-1-3p	cucucuggcgguccugugucugccaggugaccucccuggaacagggacuggccagagcugg	aacaugggacuggcgcagcuggaagcggggcagcugcugcccucccaguugcuuuuagcacucagccagucagggauggcau	aacaugggacuggcgcagcuggaagcggggcagcugcugcccucccaguugcuuuuagcacucagccagucagggauggcau	aacaugggacuggcgcagcuggaagcggggcagcugcugcccucccaguugcuuuuagcacucagccagucagggauggcau	aacaugggacuggcgcagcuggaagcggggcagcugcugcccucccaguugcuuuuagcacucagccagucagggauggcau	aacaugggacuggcgcagcuggaagcggggcagcugcugcccucccaguugcuuuuagcacucagccagucagggauggcau	aacaugggacuggcgcagcuggaagcggggcagcugcugcccucccaguugcuuuuagcacucagccagucagggauggcau	aacaugggacuggcgcagcuggaagcggggcagcugcugcccucccaguugcuuuuagcacucagccagucagggauggcau	aacaugggacuggcgcagcuggaagcggggcagcugcugcccucccaguugcuuuuagcacucagccagucagggauggcau	gaacagggacuggccagagcugg	uagcacucagccagucagggauggcau	uagcacucagccagucagggauggcau	uagcacucagccagucagggauggcau	uagcacucagccagucagggauggcau	uagcacucagccagucagggauggcau	uagcacucagccagucagggauggcau	uagcacucagccagucagggauggcau	uagcacucagccagucagggauggcau	6	0	0	0	0	0	0	0	0	0.728348	0	0	0	0	0	0	0	0
139	conserve-cli-miR-642-5p	aucccucuuugcggaacugcuuucgagaggcuggagagcggcucugugcagagggaucug	aucccucuuugcggaacugcuuucgagaggcuggagagcggcucugugcagagggaucug	aucccucuuugcggaacugcuuucgagaggcuggagagcggcucugugcagagggaucug	aucccucuuugcggaacugcuuucgagaggcuggagagcggcucugugcagagggaucug	aucccucuuugcggaacugcuuucgagaggcuggagagcggcucugugcagagggaucug	aucccucuuugcggaacugcuuucgagaggcuggagagcggcucugugcagagggaucu	aucccucuuugcggaacugcuuucgagaggcuggagagcggcucugugcagagggaucug	aucccucuuugcggaacugcuuucgagaggcuggagagcggcucugugcagagggaucu	aucccucuuugcggaacugcuuucgagaggcuggagagcggcucugugcagagggaucug	aucccucuuugcggaacugcuu	aucccucuuugcggaacugcuu	aucccucuuugcggaacugcuu	aucccucuuugcggaacugcuu	aucccucuuugcggaacugcuu	aucccucuuugcggaacugcu	aucccucuuugcggaacugcuu	aucccucuuugcggaacugcu	aucccucuuugcggaacugcuu	0	0	0	0	0	2	0	2	0	0	0	0	0	0	0.228321	0	0.223936	0
140	conserve-cli-miR-647-1-3p	agcgugagcgcagcaggaccccaagacugguugggcacugguggcugcagccucaugcucc	agcgugagcgcagcaggaccccaagacugguugggcacugguggcugcagccucaugcucc	agcgugagcgcagcaggaccccaagacugguugggcacugguggcugcagccucaugcucc	agcgugagcgcagcaggaccccaagacugguugggcacugguggcugcagccucaugcucc	agcgugagcgcagcaggaccccaagacugguugggcacugguggcugcagccucaugcucc	agcgugagcgcagcaggaccccaagacugguugggcacugguggcugcagccucaugcucc	agcgugagcgcagcaggaccccaagacugguugggcacugguggcugcagccucaugcucc	agcgugagcgcagcaggaccccaagacugguugggcacugguggcugcagccucaugcucc	agcgugagcgcagcaggaccccaagacugguugggcacugguggcugcagccucaugcucc	guggcugcagccucaugcucc	guggcugcagccucaugcucc	guggcugcagccucaugcucc	guggcugcagccucaugcucc	guggcugcagccucaugcucc	guggcugcagccucaugcucc	guggcugcagccucaugcucc	guggcugcagccucaugcucc	guggcugcagccucaugcucc	0	3	8	0	6	0	0	0	0	0	0.379893	0.811261	0	0.71808	0	0	0	0
141	conserve-cli-miR-652b-3p	gcguuaagcaccugucuggcucagcaacagcaacuggaaugacaggaacuugaugccc	gcguuaagcaccugucuggcucagcaacagcaacuggaaugacaggaacuugaugccc	gcguuaagcaccugucuggcucagcaacagcaacuggaaugacaggaacuugaugccc	gcguuaagcaccugucuggcucagcaacagcaacuggaaugacaggaacuugaugccc	gcguuaagcaccugucuggcucagcaacagcaacuggaaugacaggaacuugaugccc	gcguuaagcaccugucuggcucagcaacagcaacuggaaugacaggaacuugaugccc	gcguuaagcaccugucuggcucagcaacagcaacuggaaugacaggaacuugaugccc	agcguuaagcaccugucuggcucagcaacagcaacuggaaugacaggaacuugaugccca	aagcguuaagcaccugucuggcucagcaacagcaacuggaaugacaggaacuugaugccc	aaugacaggaacuugaugccc	aaugacaggaacuugaugccc	aaugacaggaacuugaugccc	aaugacaggaacuugaugccc	aaugacaggaacuugaugccc	aaugacaggaacuugaugccc	aaugacaggaacuugaugccc	aaugacaggaacuugaugccca	aaugacaggaacuugaugccc	0	0	0	0	0	3	0	6	6	0	0	0	0	0	0.342482	0	0.671808	0.540653
142	conserve-cli-miR-6542-3p	ugucugccagcaucagccccaaugccgucacaagugccaacgggacagugcugaagacuac	ugucugccagcaucagccccaaugccgucacaagugccaacgggacagugcugaagacuac	ugucugccagcaucagccccaaugccgucacaagugccaacgggacagugcugaagacuac	ugucugccagcaucagccccaaugccgucacaagugccaacgggacagugcugaagacuac	gucugccagcaucagccccaaugccgucacaagugccaacgggacagugcugaagacua	ugucugccagcaucagccccaaugccgucacaagugccaacgggacagugcugaagacuac	ugucugccagcaucagccccaaugccgucacaagugccaacgggacagugcugaagacuac	ugucugccagcaucagccccaaugccgucacaagugccaacgggacagugcugaagacuac	ugucugccagcaucagccccaaugccgucacaagugccaacgggacagugcugaagacuac	acgggacagugcugaagacuac	acgggacagugcugaagacuac	acgggacagugcugaagacuac	acgggacagugcugaagacuac	acgggacagugcugaagacua	acgggacagugcugaagacuac	acgggacagugcugaagacuac	acgggacagugcugaagacuac	acgggacagugcugaagacuac	128	72	0	0	9	0	0	0	0	15.5381	9.11743	0	0	1.07712	0	0	0	0
143	conserve-cli-miR-6563-5p	ucugggcaaggugcagcaggagcugauggcugccaauuccugagguaccuugcccauacc	ucugggcaaggugcagcaggagcugauggcugccaauuccugagguaccuugcccauacc	ucugggcaaggugcagcaggagcugauggcugccaauuccugagguaccuugcccauacc	ucugggcaaggugcagcaggagcugauggcugccaauuccugagguaccuugcccauacc	ucugggcaaggugcagcaggagcugauggcugccaauuccugagguaccuugcccauacc	ucugggcaaggugcagcaggagcugauggcugccaauuccugagguaccuugcccauacc	ucugggcaaggugcagcaggagcugauggcugccaauuccugagguaccuugcccauacc	ucugggcaaggugcagcaggagcugauggcugccaauuccugagguaccuugcccauacc	ucugggcaaggugcagcaggagcugauggcugccaauuccugagguaccuugcccauacc	ucugggcaaggugcagcaggagc	ucugggcaaggugcagcaggagc	ucugggcaaggugcagcaggagc	ucugggcaaggugcagcaggagc	ucugggcaaggugcagcaggagc	ucugggcaaggugcagcaggagc	ucugggcaaggugcagcaggagc	ucugggcaaggugcagcaggagc	ucugggcaaggugcagcaggagc	0	0	0	0	0	0	0	0	2	0	0	0	0	0	0	0	0	0.180218
144	conserve-cli-miR-6615-3p	aggcacuguggaaauagagcugugguggugguacacauccuucuugggcuuugugacaccccgcaaucugugccaguguggug	gcucagcgacugccccuaauuuacuggcugggaacccgcugcagggaccggcaauaaucggugcaguguggagcug	aggcacuguggaaauagagcugugguggugguacacauccuucuugggcuuugugacaccccgcaaucugugccaguguggug	aggcacuguggaaauagagcugugguggugguacacauccuucuugggcuuugugacaccccgcaaucugugccaguguggug	aggcacuguggaaauagagcugugguggugguacacauccuucuugggcuuugugacaccccgcaaucugugccaguguggug	aggcacuguggaaauagagcugugguggugguacacauccuucuugggcuuugugacaccccgcaaucugugccaguguggug	aggcacuguggaaauagagcugugguggugguacacauccuucuugggcuuugugacaccccgcaaucugugccaguguggug	aggcacuguggaaauagagcugugguggugguacacauccuucuugggcuuugugacaccccgcaaucugugccaguguggug	aggcacuguggaaauagagcugugguggugguacacauccuucuugggcuuugugacaccccgcaaucugugccaguguggug	cugugccaguguggug	cggugcaguguggagcug	cugugccaguguggug	cugugccaguguggug	cugugccaguguggug	cugugccaguguggug	cugugccaguguggug	cugugccaguguggug	cugugccaguguggug	0	2	0	0	0	0	0	0	0	0	0.253262	0	0	0	0	0	0	0
145	conserve-cli-miR-6669-5p	guggggagguaggagucuggggagaaccucgcagugaugcuuuccugagacuguguuacccugcug	gcuggggauggaggagcuggagccgcacgagugggaugcagccaucuguccccaaagc	gcuggggauggaggagcuggagccgcacgagugggaugcagccaucuguccccaaagc	gcuggggauggaggagcuggagccgcacgagugggaugcagccaucuguccccaaagc	cuggaggaagcugaggccgggggccggcgagcgagagcugcucuuggu	cuggaggaagcugaggccgggggccggcgagcgagagcugcucuuggu	cuggaggaagcugaggccgggggccggcgagcgagagcugcucuuggu	gcuggggauggaggagcuggagccgcacgagugggaugcagccaucuguccccaaagc	gcuggggauggaggagcuggagccgcacgagugggaugcagccaucuguccccaaagc	guggggagguaggagucuggggagaa	gcuggggauggaggagcuggagcc	gcuggggauggaggagcuggagcc	gcuggggauggaggagcuggagcc	cuggaggaagcugaggcc	cuggaggaagcugaggcc	cuggaggaagcugaggcc	gcuggggauggaggagcuggagcc	gcuggggauggaggagcuggagcc	0	0	0	0	4	4	3	0	0	0	0	0	0	0.47872	0.456642	0.316748	0	0
146	conserve-cli-miR-6675-3p	cggccgggacacaccagagcgauucugcucuggagaacacggcacca	cggccgggacacaccagagcgauucugcucuggagaacacggcacca	cggccgggacacaccagagcgauucugcucuggagaacacggcacca	cggccgggacacaccagagcgauucugcucuggagaacacggcacca	cggccgggacacaccagagcgauucugcucuggagaacacggcacca	cggccgggacacaccagagcgauucugcucuggagaacacggcacca	cggccgggacacaccagagcgauucugcucuggagaacacggcacca	cggccgggacacaccagagcgauucugcucuggagaacacggcacca	cggccgggacacaccagagcgauucugcucuggagaacacggcacca	gcucuggagaacacggcacca	gcucuggagaacacggcacca	gcucuggagaacacggcacca	gcucuggagaacacggcacca	gcucuggagaacacggcacca	gcucuggagaacacggcacca	gcucuggagaacacggcacca	gcucuggagaacacggcacca	gcucuggagaacacggcacca	0	0	0	0	4	0	0	0	0	0	0	0	0	0.47872	0	0	0	0
147	conserve-cli-miR-6690-3p	ucagaaggagauccuuaguguguguaagcgacacagaugcacacugauuccccuucuggcu	ucagaaggagauccuuaguguguguaagcgacacagaugcacacugauuccccuucuggcu	ucagaaggagauccuuaguguguguaagcgacacagaugcacacugauuccccuucuggcu	ucagaaggagauccuuaguguguguaagcgacacagaugcacacugauuccccuucuggcu	ucagaaggagauccuuaguguguguaagcgacacagaugcacacugauuccccuucuggcu	ucagaaggagauccuuaguguguguaagcgacacagaugcacacugauuccccuucuggcu	ucagaaggagauccuuaguguguguaagcgacacagaugcacacugauuccccuucuggcu	ucagaaggagauccuuaguguguguaagcgacacagaugcacacugauuccccuucuggcu	ucagaaggagauccuuaguguguguaagcgacacagaugcacacugauuccccuucuggcu	cacacugauuccccuucuggcu	cacacugauuccccuucuggcu	cacacugauuccccuucuggcu	cacacugauuccccuucuggcu	cacacugauuccccuucuggcu	cacacugauuccccuucuggcu	cacacugauuccccuucuggcu	acacugauuccccuucuggcu	cacacugauuccccuucuggcu	40	20	21	4	10	11	1	2	2	4.85565	2.53262	2.12956	0.481822	1.1968	1.25577	0.105583	0.223936	0.180218
148	conserve-cli-miR-6690-5p	ucagaaggagauccuuaguguguguaagcgacacagaugcacacugauuccccuucuggcu	ucagaaggagauccuuaguguguguaagcgacacagaugcacacugauuccccuucuggcu	ucagaaggagauccuuaguguguguaagcgacacagaugcacacugauuccccuucuggcu	ucagaaggagauccuuaguguguguaagcgacacagaugcacacugauuccccuucuggcu	ucagaaggagauccuuaguguguguaagcgacacagaugcacacugauuccccuucuggcu	ucagaaggagauccuuaguguguguaagcgacacagaugcacacugauuccccuucuggcu	ucagaaggagauccuuaguguguguaagcgacacagaugcacacugauuccccuucuggcu	ucagaaggagauccuuaguguguguaagcgacacagaugcacacugauuccccuucuggcu	ucagaaggagauccuuaguguguguaagcgacacagaugcacacugauuccccuucuggcu	ucagaaggagauccuuagugugu	ucagaaggagauccuuagugugu	ucagaaggagauccuuagugugu	ucagaaggagauccuuagugugu	ucagaaggagauccuuagugugu	ucagaaggagauccuuagugugu	ucagaaggagauccuuagugugu	ucagaaggagauccuuagugugu	ucagaaggagauccuuagugugu	88	113	117	10	39	61	14	18	23	10.6824	14.3093	11.8647	1.20455	4.66752	6.96379	1.47816	2.01542	2.07251
149	conserve-cli-miR-6748-3p	cugguugaucaggggcuuggaccagaugaucuccaaagguccugucccaccucaaccacucg	cugguugaucaggggcuuggaccagaugaucuccaaagguccugucccaccucaaccacucgc	cugguugaucaggggcuuggaccagaugaucuccaaagguccugucccaccucaaccacucg	cugguugaucaggggcuuggaccagaugaucuccaaagguccugucccaccucaaccacucg	cugguugaucaggggcuuggaccagaugaucuccaaagguccugucccaccucaaccacucg	cugguugaucaggggcuuggaccagaugaucuccaaagguccugucccaccucaaccacucg	cugguugaucaggggcuuggaccagaugaucuccaaagguccugucccaccucaaccacucg	cugguugaucaggggcuuggaccagaugaucuccaaagguccugucccaccucaaccacucg	cugguugaucaggggcuuggaccagaugaucuccaaagguccugucccaccucaaccacucg	uccugucccaccucaaccacucg	uccugucccaccucaaccacucgc	uccugucccaccucaaccacucg	uccugucccaccucaaccacucg	uccugucccaccucaaccacucg	uccugucccaccucaaccacucg	uccugucccaccucaaccacucg	uccugucccaccucaaccacucg	uccugucccaccucaaccacucg	0	5	0	0	0	0	0	0	0	0	0.633155	0	0	0	0	0	0	0
150	conserve-cli-miR-6748-5p	cugguugaucaggggcuuggaccagaugaucuccaaagguccugucccaccucaaccacucg	cugguugaucaggggcuuggaccagaugaucuccaaagguccugucccaccucaaccacucgc	cugguugaucaggggcuuggaccagaugaucuccaaagguccugucccaccucaaccacucg	cugguugaucaggggcuuggaccagaugaucuccaaagguccugucccaccucaaccacucg	cugguugaucaggggcuuggaccagaugaucuccaaagguccugucccaccucaaccacucg	cugguugaucaggggcuuggaccagaugaucuccaaagguccugucccaccucaaccacucg	cugguugaucaggggcuuggaccagaugaucuccaaagguccugucccaccucaaccacucg	cugguugaucaggggcuuggaccagaugaucuccaaagguccugucccaccucaaccacucg	cugguugaucaggggcuuggaccagaugaucuccaaagguccugucccaccucaaccacucg	cugguugaucaggggcuuggac	cugguugaucaggggcuuggacc	cugguugaucaggggcuuggac	cugguugaucaggggcuuggac	cugguugaucaggggcuuggac	cugguugaucaggggcuuggac	cugguugaucaggggcuuggac	cugguugaucaggggcuuggac	cugguugaucaggggcuuggac	0	1	0	0	0	0	0	0	0	0	0.126631	0	0	0	0	0	0	0
151	conserve-cli-miR-6753-5p	ggaggagcggccauaugaccacacagcagaccuguggucugugggcugcauccuguac	ggaggagcggccauaugaccacacagcagaccuguggucugugggcugcauccuguac	ggaggagcggccauaugaccacacagcagaccuguggucugugggcugcauccuguac	ggaggagcggccauaugaccacacagcagaccuguggucugugggcugcauccuguac	ggaggagcggccauaugaccacacagcagaccuguggucugugggcugcauccuguac	ggaggagcggccauaugaccacacagcagaccuguggucugugggcugcauccuguac	ggaggagcggccauaugaccacacagcagaccuguggucugugggcugcauccuguac	ggaggagcggccauaugaccacacagcagaccuguggucugugggcugcauccuguac	ugugcagcuggcucaucucuguccuggcugcugccaaaguaccagaagaugaggcuucuuggcuguuggg	ggaggagcggccauaugaccaca	ggaggagcggccauaugaccaca	ggaggagcggccauaugaccaca	ggaggagcggccauaugaccaca	ggaggagcggccauaugaccaca	ggaggagcggccauaugaccaca	ggaggagcggccauaugaccaca	ggaggagcggccauaugaccaca	ugugcagcuggcucaucucuguc	0	0	0	0	0	0	0	0	8	0	0	0	0	0	0	0	0	0.720871
152	conserve-cli-miR-6809-5p	uuucucuuaugcaauugguuugaauuaaaauuaaaaccaauugcauaagagaaaac	uuucucuuaugcaauugguuugaauuaaaauuaaaaccaauugcauaagagaaaac	uuucucuuaugcaauugguuugaauuaaaauuaaaaccaauugcauaagagaaaac	uuucucuuaugcaauugguuugaauuaaaauuaaaaccaauugcauaagagaaaac	uuucucuuaugcaauugguuugaauuaaaauuaaaaccaauugcauaagagaaaac	uuucucuuaugcaauugguuugaauuaaaauuaaaaccaauugcauaagagaaaac	uuucucuuaugcaauugguuugaauuaaaauuaaaaccaauugcauaagagaaaac	uuucucuuaugcaauugguuugaauuaaaauuaaaaccaauugcauaagagaaaac	uuucucuuaugcaauugguuugaauuaaaauuaaaaccaauugcauaagagaaaac	uuucucuuaugcaauugguuug	uuucucuuaugcaauugguuug	uuucucuuaugcaauugguuug	uuucucuuaugcaauugguuug	uuucucuuaugcaauugguuug	uuucucuuaugcaauugguuug	uuucucuuaugcaauugguuug	uuucucuuaugcaauugguuug	uuucucuuaugcaauugguuug	0	0	0	0	0	2	4	0	0	0	0	0	0	0	0.228321	0.422331	0	0
153	conserve-cli-miR-6815-5p	cagguggccgcgcugacagcuggucacaugauggcugucagcgcuggcgcuucacccgcu	cagguggccgcgcugacagcuggucacaugauggcugucagcgcuggcgcuucacccg	cagguggccgcgcugacagcuggucacaugauggcugucagcgcuggcgcuucacccgcu	cagguggccgcgcugacagcuggucacaugauggcugucagcgcuggcgcuucacccgcu	cagguggccgcgcugacagcuggucacaugauggcugucagcgcuggcgcuucacccgcu	cagguggccgcgcugacagcuggucacaugauggcugucagcgcuggcgcuucacccgcu	cagguggccgcgcugacagcuggucacaugauggcugucagcgcuggcgcuucacccgcu	cagguggccgcgcugacagcuggucacaugauggcugucagcgcuggcgcuucacccgcu	cagguggccgcgcugacagcuggucacaugauggcugucagcgcuggcgcuucacccgcu	cagguggccgcgcugacagcu	cagguggccgcgcugacagcu	cagguggccgcgcugacagcu	cagguggccgcgcugacagcu	cagguggccgcgcugacagcu	cagguggccgcgcugacagcu	cagguggccgcgcugacagcu	cagguggccgcgcugacagcu	cagguggccgcgcugacagcu	7	7	8	0	5	0	2	0	0	0.849739	0.886416	0.811261	0	0.5984	0	0.211166	0	0
154	conserve-cli-miR-684-3p	ugggggauccuccaucagauaaaaccuuuaaaucaagguguuuuccugaaggaugcccuaga	ugggggauccuccaucagauaaaaccuuuaaaucaagguguuuuccugaaggaugcccuaga	ugggggauccuccaucagauaaaaccuuuaaaucaagguguuuuccugaaggaugcccuaga	ugggggauccuccaucagauaaaaccuuuaaaucaagguguuuuccugaaggaugcccuaga	ugggggauccuccaucagauaaaaccuuuaaaucaagguguuuuccugaaggaugcccuaga	ugggggauccuccaucagauaaaaccuuuaaaucaagguguuuuccugaaggaugcccuaga	ugggggauccuccaucagauaaaaccuuuaaaucaagguguuuuccugaaggaugcccuaga	ugggggauccuccaucagauaaaaccuuuaaaucaagguguuuuccugaaggaugcccuaga	ugggggauccuccaucagauaaaaccuuuaaaucaagguguuuuccugaaggaugcccuaga	uguuuuccugaaggaugcccuaga	uuuuccugaaggaugcccuaga	uguuuuccugaaggaugcccuaga	uguuuuccugaaggaugcccuaga	uguuuuccugaaggaugcccuaga	uguuuuccugaaggaugcccuaga	uguuuuccugaaggaugcccuaga	uguuuuccugaaggaugcccuaga	uguuuuccugaaggaugcccuaga	0	3	6	0	0	0	0	0	0	0	0.379893	0.608446	0	0	0	0	0	0
155	conserve-cli-miR-6951-1-3p	cgcgguugccuucagagggccgauuauuuauacaguucuaacauuacauuuggccuucugaaggcaaccgugaga	cuuuuuucucauguccugcagguuuuguaguuagguguaguuuuuuucacuagcagaaauccuugaagauacaugaga	cuuuuuucucauguccugcagguuuuguaguuagguguaguuuuuuucacuagcagaaauccuugaagauacaugaga	cuuuuuucucauguccugcagguuuuguaguuagguguaguuuuuuucacuagcagaaauccuugaagauacaugaga	cuuuuuucucauguccugcagguuuuguaguuagguguaguuuuuuucacuagcagaaauccuugaagauacaugaga	cuuuuuucucauguccugcagguuuuguaguuagguguaguuuuuuucacuagcagaaauccuugaagauacaugaga	ucgcgguugccuucagagggccgauuauuuauacaguucuaacauuacauuuggccuucugaaggcaaccgugaga	cuuuuuucucauguccugcagguuuuguaguuagguguaguuuuuuucacuagcagaaauccuugaagauacaugaga	ucgcgguugccuucagagggccgauuauuuauacaguucuaacauuacauuuggccuucugaaggcaaccgugaga	ccuucugaaggcaaccgugaga	ccuugaagauacaugaga	ccuugaagauacaugaga	ccuugaagauacaugaga	ccuugaagauacaugaga	ccuugaagauacaugaga	ccuucugaaggcaaccgugaga	ccuugaagauacaugaga	ccuucugaaggcaaccgugaga	3	0	0	0	0	0	9	0	8	0.364174	0	0	0	0	0	0.950245	0	0.720871
156	conserve-cli-miR-6951-1-5p	cgcgguugccuucagagggccgauuauuuauacaguucuaacauuacauuuggccuucugaaggcaaccgugaga	cuuuuuucucauguccugcagguuuuguaguuagguguaguuuuuuucacuagcagaaauccuugaagauacaugaga	cuuuuuucucauguccugcagguuuuguaguuagguguaguuuuuuucacuagcagaaauccuugaagauacaugaga	cuuuuuucucauguccugcagguuuuguaguuagguguaguuuuuuucacuagcagaaauccuugaagauacaugaga	cuuuuuucucauguccugcagguuuuguaguuagguguaguuuuuuucacuagcagaaauccuugaagauacaugaga	cuuuuuucucauguccugcagguuuuguaguuagguguaguuuuuuucacuagcagaaauccuugaagauacaugaga	ucgcgguugccuucagagggccgauuauuuauacaguucuaacauuacauuuggccuucugaaggcaaccgugaga	cuuuuuucucauguccugcagguuuuguaguuagguguaguuuuuuucacuagcagaaauccuugaagauacaugaga	ucgcgguugccuucagagggccgauuauuuauacaguucuaacauuacauuuggccuucugaaggcaaccgugaga	cgcgguugccuucagagggcc	cuuuuuucucauguccugcagguu	cuuuuuucucauguccugcagguu	cuuuuuucucauguccugcagguu	cuuuuuucucauguccugcagguu	cuuuuuucucauguccugcagguu	ucgcgguugccuucagagggcc	cuuuuuucucauguccugcagguu	ucgcgguugccuucagagggcc	1	0	0	0	0	0	0	0	0	0.121391	0	0	0	0	0	0	0	0
157	conserve-cli-miR-6958-3p	gcagcugcagaaccuggucaagcgggaccccgccuccuacaccgaggagguacgaaccggggcgggcgccgggggcggcggcgggg	gcagcugcagaaccuggucaagcgggaccccgccuccuacaccgaggagguacgaaccggggcgggcgccgggggcggcggcgggg	gcagcugcagaaccuggucaagcgggaccccgccuccuacaccgaggagguacgaaccggggcgggcgccgggggcggcggcgggg	gcagcugcagaaccuggucaagcgggaccccgccuccuacaccgaggagguacgaaccggggcgggcgccgggggcggcggcgggg	gcagcugcagaaccuggucaagcgggaccccgccuccuacaccgaggagguacgaaccggggcgggcgccgggggcggcggcgggg	cgggcggcggggcggggccgcgccguggaagaggcggggccagggcgcuggcgcucggcg	aggugaggcgggggggcgaggggaggggggcggccccccccuccaaaccccgcccccccccccccccccccgcccccgcccc	gcaugcccuggggggcgggagcggccucugcgcgugcgcgcauguggcgggggggggggggcgggcgcccgcgggggcggggggg	gcagcugcagaaccuggucaagcgggaccccgccuccuacaccgaggagguacgaaccggggcgggcgccgggggcggcggcgggg	cgggggcggcggcgggg	cgggggcggcggcgggg	cgggggcggcggcgggg	cgggggcggcggcgggg	cgggggcggcggcgggg	cagggcgcuggcgcucggcg	ccccccgcccccgcccc	cccgcgggggcggggggg	cgggggcggcggcgggg	0	0	0	0	0	0	1	8	0	0	0	0	0	0	0	0.105583	0.895744	0
158	conserve-cli-miR-6958-5p	gcagcugcagaaccuggucaagcgggaccccgccuccuacaccgaggagguacgaaccggggcgggcgccgggggcggcggcgggg	gcagcugcagaaccuggucaagcgggaccccgccuccuacaccgaggagguacgaaccggggcgggcgccgggggcggcggcgggg	gcagcugcagaaccuggucaagcgggaccccgccuccuacaccgaggagguacgaaccggggcgggcgccgggggcggcggcgggg	gcagcugcagaaccuggucaagcgggaccccgccuccuacaccgaggagguacgaaccggggcgggcgccgggggcggcggcgggg	gcagcugcagaaccuggucaagcgggaccccgccuccuacaccgaggagguacgaaccggggcgggcgccgggggcggcggcgggg	cgggcggcggggcggggccgcgccguggaagaggcggggccagggcgcuggcgcucggcg	aggugaggcgggggggcgaggggaggggggcggccccccccuccaaaccccgcccccccccccccccccccgcccccgcccc	gcaugcccuggggggcgggagcggccucugcgcgugcgcgcauguggcgggggggggggggcgggcgcccgcgggggcggggggg	gcagcugcagaaccuggucaagcgggaccccgccuccuacaccgaggagguacgaaccggggcgggcgccgggggcggcggcgggg	gcagcugcagaaccuggucaag	gcagcugcagaaccuggucaag	gcagcugcagaaccuggucaag	gcagcugcagaaccuggucaag	gcagcugcagaaccuggucaag	cgggcggcggggcggggc	aggugaggcgggggggcg	gcaugcccuggggggcg	gcagcugcagaaccuggucaag	0	0	0	0	0	2	8	0	0	0	0	0	0	0	0.228321	0.844662	0	0
159	conserve-cli-miR-6962-5p	caggaccuagugaaacccugagaguacaaaaaguauuugcauugacucucuuucacuaggucuccuaaccugca	caggaccuagugaaacccugagaguacaaaaaguauuugcauugacucucuuucacuaggucuccuaaccugca	caggaccuagugaaacccugagaguacaaaaaguauuugcauugacucucuuucacuaggucuccuaaccugca	caggaccuagugaaacccugagaguacaaaaaguauuugcauugacucucuuucacuaggucuccuaaccugca	caggaccuagugaaacccugagaguacaaaaaguauuugcauugacucucuuucacuaggucuccuaaccugca	caggaccuagugaaacccugagaguacaaaaaguauuugcauugacucucuuucacuaggucuccuaaccugca	caggaccuagugaaacccugagaguacaaaaaguauuugcauugacucucuuucacuaggucuccuaaccugca	caggaccuagugaaacccugagaguacaaaaaguauuugcauugacucucuuucacuaggucuccuaaccugca	caggaccuagugaaacccugagaguacaaaaaguauuugcauugacucucuuucacuaggucuccuaaccugca	caggaccuagugaaacccugagagu	caggaccuagugaaacccugagagu	caggaccuagugaaacccugagagu	caggaccuagugaaacccugagagu	caggaccuagugaaacccugagagu	caggaccuagugaaacccugagagu	caggaccuagugaaacccugagagu	caggaccuagugaaacccugagagu	caggaccuagugaaacccugagagu	0	0	0	3	0	0	0	0	0	0	0	0	0.361366	0	0	0	0	0
160	conserve-cli-miR-7085-5p	ggaaguccugccgcuaacguggcuguuaaagucuuuaaaaaggcugcagauggaagcuggcaggacuuugcu	ggaaguccugccgcuaacguggcuguuaaagucuuuaaaaaggcugcagauggaagcuggcaggacuuugcu	ggaaguccugccgcuaacguggcuguuaaagucuuuaaaaaggcugcagauggaagcuggcaggacuuugcu	ggaaguccugccgcuaacguggcuguuaaagucuuuaaaaaggcugcagauggaagcuggcaggacuuugcu	ggaaguccugccgcuaacguggcuguuaaagucuuuaaaaaggcugcagauggaagcuggcaggacuuugcu	ggaaguccugccgcuaacguggcuguuaaagucuuuaaaaaggcugcagauggaagcuggcaggacuuugcu	ugaagcuggagagacucuggaccuggaugcaugguccagagcaucugcaaauaug	ggaaguccugccgcuaacguggcuguuaaagucuuuaaaaaggcugcagauggaagcuggcaggacuuugcu	ggaaguccugccgcuaacguggcuguuaaagucuuuaaaaaggcugcagauggaagcuggcaggacuuugcu	ggaaguccugccgcuaac	ggaaguccugccgcuaac	ggaaguccugccgcuaac	ggaaguccugccgcuaac	ggaaguccugccgcuaac	ggaaguccugccgcuaac	ugaagcuggagagacucu	ggaaguccugccgcuaac	ggaaguccugccgcuaac	0	0	0	0	0	0	5	0	0	0	0	0	0	0	0	0.527914	0	0
161	conserve-cli-miR-7094-1-3p	augcagaucuuucuuggugcaaggggcugaccagccuucucugucugaagagagcugcaucc	gaugcagaucuuucuuggugcaaggggcugaccagccuucucugucugaagagagcugcaucca	gaugcagaucuuucuuggugcaaggggcugaccagccuucucugucugaagagagcugcaucca	gaugcagaucuuucuuggugcaaggggcugaccagccuucucugucugaagagagcugcaucca	gaugcagaucuuucuuggugcaaggggcugaccagccuucucugucugaagagagcugcaucca	gaugcagaucuuucuuggugcaaggggcugaccagccuucucugucugaagagagcugcaucca	gaugcagaucuuucuuggugcaaggggcugaccagccuucucugucugaagagagcugcaucca	gaugcagaucuuucuuggugcaaggggcugaccagccuucucugucugaagagagcugcaucca	gaugcagaucuuucuuggugcaaggggcugaccagccuucucugucugaagagagcugcaucca	ucugaagagagcugcaucc	ucugaagagagcugcaucca	ucugaagagagcugcaucca	ucugaagagagcugcaucca	ucugaagagagcugcaucca	ucugaagagagcugcaucca	ucugaagagagcugcaucca	ucugaagagagcugcaucca	ucugaagagagcugcaucca	4	3	0	0	0	0	0	0	0	0.485565	0.379893	0	0	0	0	0	0	0
162	conserve-cli-miR-7115-3p	gagggugcucuuggcaccuagagcauucauauuccugcucuugguccacagcaccucuuc	gagggugcucuuggcaccuagagcauucauauuccugcucuugguccacagcaccucuuc	agggugcucuuggcaccuagagcauucauauuccugcucuugguccacagcaccucuuca	agggugcucuuggcaccuagagcauucauauuccugcucuugguccacagcaccucuuca	agggugcucuuggcaccuagagcauucauauuccugcucuugguccacagcaccucuuca	agggugcucuuggcaccuagagcauucauauuccugcucuugguccacagcaccucuuca	agggugcucuuggcaccuagagcauucauauuccugcucuugguccacagcaccucuuca	agggugcucuuggcaccuagagcauucauauuccugcucuugguccacagcaccucuuca	agggugcucuuggcaccuagagcauucauauuccugcucuugguccacagcaccucuuca	ucuugguccacagcaccucuuc	ucuugguccacagcaccucuuc	ucuugguccacagcaccucuuca	ucuugguccacagcaccucuuca	ucuugguccacagcaccucuuca	ucuugguccacagcaccucuuca	ucuugguccacagcaccucuuca	ucuugguccacagcaccucuuca	ucuugguccacagcaccucuuca	229	107	139	0	18	0	0	0	0	27.7986	13.5495	14.0957	0	2.15424	0	0	0	0
163	conserve-cli-miR-7116-3p	gguuuagugaggucuucagauugacuccgguggguuggccuuggcccugcuggagugucaagaagacagucgaacuugacu	aaaaucagucgucaucuugcugcaucuguauucacacaggugaugggcugguuuuca	gguuuagugaggucuucagauugacuccgguggguuggccuuggcccugcuggagugucaagaagacagucgaacuugacu	gguuuagugaggucuucagauugacuccgguggguuggccuuggcccugcuggagugucaagaagacagucgaacuugacu	gguuuagugaggucuucagauugacuccgguggguuggccuuggcccugcuggagugucaagaagacagucgaacuugacu	gguuuagugaggucuucagauugacuccgguggguuggccuuggcccugcuggagugucaagaagacagucgaacuugacu	gguuuagugaggucuucagauugacuccgguggguuggccuuggcccugcuggagugucaagaagacagucgaacuugacu	gguuuagugaggucuucagauugacuccgguggguuggccuuggcccugcuggagugucaagaagacagucgaacuugacu	gguuuagugaggucuucagauugacuccgguggguuggccuuggcccugcuggagugucaagaagacagucgaacuugacu	agaagacagucgaacuugacu	acaggugaugggcugguuuuca	agaagacagucgaacuugacu	agaagacagucgaacuugacu	agaagacagucgaacuugacu	agaagacagucgaacuugacu	agaagacagucgaacuugacu	agaagacagucgaacuugacu	agaagacagucgaacuugacu	0	1	0	0	0	0	0	0	0	0	0.126631	0	0	0	0	0	0	0
164	conserve-cli-miR-7116-5p	gguuuagugaggucuucagauugacuccgguggguuggccuuggcccugcuggagugucaagaagacagucgaacuugacu	aaaaucagucgucaucuugcugcaucuguauucacacaggugaugggcugguuuuca	gguuuagugaggucuucagauugacuccgguggguuggccuuggcccugcuggagugucaagaagacagucgaacuugacu	gguuuagugaggucuucagauugacuccgguggguuggccuuggcccugcuggagugucaagaagacagucgaacuugacu	gguuuagugaggucuucagauugacuccgguggguuggccuuggcccugcuggagugucaagaagacagucgaacuugacu	gguuuagugaggucuucagauugacuccgguggguuggccuuggcccugcuggagugucaagaagacagucgaacuugacu	gguuuagugaggucuucagauugacuccgguggguuggccuuggcccugcuggagugucaagaagacagucgaacuugacu	gguuuagugaggucuucagauugacuccgguggguuggccuuggcccugcuggagugucaagaagacagucgaacuugacu	gguuuagugaggucuucagauugacuccgguggguuggccuuggcccugcuggagugucaagaagacagucgaacuugacu	gguuuagugaggucuuc	aaaaucagucgucaucuugcu	gguuuagugaggucuuc	gguuuagugaggucuuc	gguuuagugaggucuuc	gguuuagugaggucuuc	gguuuagugaggucuuc	gguuuagugaggucuuc	gguuuagugaggucuuc	0	5	0	0	0	0	0	0	0	0	0.633155	0	0	0	0	0	0	0
165	conserve-cli-miR-7186-3p	caaggaugggggggcccuuccggaugcaugagcguggcuguugcauuugucugugguuuguccgucgggg	caaggaugggggggcccuuccggaugcaugagcguggcuguugcauuugucugugguuuguccgucgggg	caaggaugggggggcccuuccggaugcaugagcguggcuguugcauuugucugugguuuguccgucgggg	caaggaugggggggcccuuccggaugcaugagcguggcuguugcauuugucugugguuuguccgucgggg	uucuguggaguuuucggggguucaccugcuaaggugcuuuguagcccauguuaccggaaaccugccuacu	caaggaugggggggcccuuccggaugcaugagcguggcuguugcauuugucugugguuuguccgucgggg	caaggaugggggggcccuuccggaugcaugagcguggcuguugcauuugucugugguuuguccgucgggg	caaggaugggggggcccuuccggaugcaugagcguggcuguugcauuugucugugguuuguccgucgggg	caaggaugggggggcccuuccggaugcaugagcguggcuguugcauuugucugugguuuguccgucgggg	cugugguuuguccgucgggg	cugugguuuguccgucgggg	cugugguuuguccgucgggg	cugugguuuguccgucgggg	cauguuaccggaaaccugccuacu	cugugguuuguccgucgggg	cugugguuuguccgucgggg	cugugguuuguccgucgggg	cugugguuuguccgucgggg	0	0	0	0	2	0	0	0	0	0	0	0	0	0.23936	0	0	0	0
166	conserve-cli-miR-7195-3p	gcugucagaacaggggaaggaacauggugcugccauccauccuccauucugacagcug	gcugucagaacaggggaaggaacauggugcugccauccauccuccauucugacagcug	ggcugucagaacaggggaaggaacauggugcugccauccauccuccauucugacagcugc	ggcugucagaacaggggaaggaacauggugcugccauccauccuccauucugacagcugc	ggcugucagaacaggggaaggaacauggugcugccauccauccuccauucugacagcugc	gcugucagaacaggggaaggaacauggugcugccauccauccuccauucugacagcug	gcugucagaacaggggaaggaacauggugcugccauccauccuccauucugacagcug	ggcugucagaacaggggaaggaacauggugcugccauccauccuccauucugacagcugc	ggcugucagaacaggggaaggaacauggugcugccauccauccuccauucugacagcugc	cauccuccauucugacagcug	cauccuccauucugacagcug	cauccuccauucugacagcugc	cauccuccauucugacagcugc	cauccuccauucugacagcugc	cauccuccauucugacagcug	cauccuccauucugacagcug	cauccuccauucugacagcugc	cauccuccauucugacagcugc	0	0	2	9	42	0	0	29	16	0	0	0.202815	1.0841	5.02656	0	0	3.24707	1.44174
167	conserve-cli-miR-7244-3p	agccugacugucuucuccacagucucuucuguaaugggaagcuguaguuaggucucc	agccugacugucuucuccacagucucuucuguaaugggaagcuguaguuaggucucc	agccugacugucuucuccacagucucuucuguaaugggaagcuguaguuaggucucc	agccugacugucuucuccacagucucuucuguaaugggaagcuguaguuaggucucc	agccugacugucuucuccacagucucuucuguaaugggaagcuguaguuaggucucc	agccugacugucuucuccacagucucuucuguaaugggaagcuguaguuaggucucc	agccugacugucuucuccacagucucuucuguaaugggaagcuguaguuaggucucc	agccugacugucuucuccacagucucuucuguaaugggaagcuguaguuaggucucc	agccugacugucuucuccacagucucuucuguaaugggaagcuguaguuaggucucc	aaugggaagcuguaguuaggucucc	aaugggaagcuguaguuaggucucc	aaugggaagcuguaguuaggucucc	aaugggaagcuguaguuaggucucc	aaugggaagcuguaguuaggucucc	aaugggaagcuguaguuaggucucc	aaugggaagcuguaguuaggucucc	aaugggaagcuguaguuaggucucc	aaugggaagcuguaguuaggucucc	0	0	0	4	0	0	0	0	0	0	0	0	0.481822	0	0	0	0	0
168	conserve-cli-miR-7276-3p	cucccagagccccugcagagcaggucuaaccccagggggcugagggggac	cucccagagccccugcagagcaggucuaaccccagggggcugagggggac	cucccagagccccugcagagcaggucuaaccccagggggcugagggggac	cucccagagccccugcagagcaggucuaaccccagggggcugagggggac	cucccagagccccugcagagcaggucuaaccccagggggcugagggggac	cucccagagccccugcagagcaggucuaaccccagggggcugagggggac	cucccagagccccugcagagcaggucuaaccccagggggcugagggggac	gcaugcccuggggggcgggagcggccucugcgcgugcgcgcauguggcgggggggggggggcgggcgcccgcgggggcggggggg	cucccagagccccugcagagcaggucuaaccccagggggcugagggggac	ccccagggggcugagggggac	ccccagggggcugagggggac	ccccagggggcugagggggac	ccccagggggcugagggggac	ccccagggggcugagggggac	ccccagggggcugagggggac	ccccagggggcugagggggac	cccgcgggggcggggggg	ccccagggggcugagggggac	0	0	0	0	0	0	0	8	0	0	0	0	0	0	0	0	0.895744	0
169	conserve-cli-miR-7278-3p	aggaggcugaauuaugguuacgugccuuucauauguggaaaauggcaccuuucuucagccuucccu	aggaggcugaauuaugguuacgugccuuucauauguggaaaauggcaccuuucuucagccuucccu	aggaggcugaauuaugguuacgugccuuucauauguggaaaauggcaccuuucuucagccuucccu	aggaggcugaauuaugguuacgugccuuucauauguggaaaauggcaccuuucuucagccuucccu	aggaggcugaauuaugguuacgugccuuucauauguggaaaauggcaccuuucuucagccuucccu	aggaggcugaauuaugguuacgugccuuucauauguggaaaauggcaccuuucuucagccuucccu	aggaggcugaauuaugguuacgugccuuucauauguggaaaauggcaccuuucuucagccuucccu	aggaggcugaauuaugguuacgugccuuucauauguggaaaauggcaccuuucuucagccuucccu	aggaggcugaauuaugguuacgugccuuucauauguggaaaauggcaccuuucuucagccuucccu	caccuuucuucagccuucccu	caccuuucuucagccuucccu	caccuuucuucagccuucccu	caccuuucuucagccuucccu	caccuuucuucagccuucccu	caccuuucuucagccuucccu	caccuuucuucagccuucccu	caccuuucuucagccuucccu	caccuuucuucagccuucccu	2	3	3	0	3	0	0	0	0	0.242783	0.379893	0.304223	0	0.35904	0	0	0	0
170	conserve-cli-miR-7293-5p	ugccagggauggaggauguacagugaauaccacuccuguccucuccaucccugucccc	uuauccuacuccaucccaucccaccagccccacgggaccacacgcugggcaagggaggaugcug	uuauccuacuccaucccaucccaccagccccacgggaccacacgcugggcaagggaggaugcug	uuauccuacuccaucccaucccaccagccccacgggaccacacgcugggcaagggaggaugcug	uuauccuacuccaucccaucccaccagccccacgggaccacacgcugggcaagggaggaugcug	uuauccuacuccaucccaucccaccagccccacgggaccacacgcugggcaagggaggaugcug	uuauccuacuccaucccaucccaccagccccacgggaccacacgcugggcaagggaggaugcug	ugccagggauggaggauguacagugaauaccacuccuguccucuccaucccuguccccu	uuauccuacuccaucccaucccaccagccccacgggaccacacgcugggcaagggaggaugcug	ugccagggauggaggauguacagu	uuauccuacuccaucccaucccac	uuauccuacuccaucccaucccac	uuauccuacuccaucccaucccac	uuauccuacuccaucccaucccac	uuauccuacuccaucccaucccac	uuauccuacuccaucccaucccac	ugccagggauggaggauguacagu	uuauccuacuccaucccaucccac	10	0	0	0	0	0	0	4	0	1.21391	0	0	0	0	0	0	0.447872	0
171	conserve-cli-miR-7345b-3p	agggcugggcugugcugcagucacuuauugcaucgcuuggcuuugauccuugg	cagguaccagggcugggcugugcugcagucacuuauugcaucgcuuggcuuugauccuugg	cagguaccagggcugggcugugcugcagucacuuauugcaucgcuuggcuuugauccuugg	cagguaccagggcugggcugugcugcagucacuuauugcaucgcuuggcuuugauccuugg	cagguaccagggcugggcugugcugcagucacuuauugcaucgcuuggcuuugauccuugg	cagguaccagggcugggcugugcugcagucacuuauugcaucgcuuggcuuugauccuugg	cagguaccagggcugggcugugcugcagucacuuauugcaucgcuuggcuuugauccuugg	cagguaccagggcugggcugugcugcagucacuuauugcaucgcuuggcuuugauccuugg	cagguaccagggcugggcugugcugcagucacuuauugcaucgcuuggcuuugauccuugg	aucgcuuggcuuugauccuugg	aucgcuuggcuuugauccuugg	aucgcuuggcuuugauccuugg	aucgcuuggcuuugauccuugg	aucgcuuggcuuugauccuugg	aucgcuuggcuuugauccuugg	aucgcuuggcuuugauccuugg	aucgcuuggcuuugauccuugg	aucgcuuggcuuugauccuugg	13	9	7	0	0	0	0	0	0	1.57809	1.13968	0.709853	0	0	0	0	0	0
172	conserve-cli-miR-7353-1-3p	gcagcgugccgggcugggacaggugcucugauguuccucuccugccagugugcgcugcug	ugcuccugccugucugaugugcagagucacagcccaucaggcuggcagcagcagu	aagcagccgagauggggagcagcgccccagcauugcugcugccugucugggcugugacu	ugcuccugccugucugaugugcagagucacagcccaucaggcuggcagcagcagu	gcuccugccugucugaugugcagagucacagcccaucaggcuggcagcagcagu	ugcuccugccugucugaugugcagagucacagcccaucaggcuggcagcagcagu	ugcuccugccugucugaugugcagagucacagcccaucaggcuggcagcagcagu	ugcuccugccugucugaugugcagagucacagcccaucaggcuggcagcagcagu	ugcuccugccugucugaugugcagagucacagcccaucaggcuggcagcagcagu	ucuccugccagugugcgcugcug	ccaucaggcuggcagcagcagu	ugcugccugucugggcugugacu	ccaucaggcuggcagcagcagu	ccaucaggcuggcagcagcagu	ccaucaggcuggcagcagcagu	ccaucaggcuggcagcagcagu	ccaucaggcuggcagcagcagu	ccaucaggcuggcagcagcagu	6	0	3	0	1	0	0	0	0	0.728348	0	0.304223	0	0.11968	0	0	0	0
173	conserve-cli-miR-7353-1-5p	gcagcgugccgggcugggacaggugcucugauguuccucuccugccagugugcgcugcug	ugcuccugccugucugaugugcagagucacagcccaucaggcuggcagcagcagu	aagcagccgagauggggagcagcgccccagcauugcugcugccugucugggcugugacu	ugcuccugccugucugaugugcagagucacagcccaucaggcuggcagcagcagu	gcuccugccugucugaugugcagagucacagcccaucaggcuggcagcagcagu	ugcuccugccugucugaugugcagagucacagcccaucaggcuggcagcagcagu	ugcuccugccugucugaugugcagagucacagcccaucaggcuggcagcagcagu	ugcuccugccugucugaugugcagagucacagcccaucaggcuggcagcagcagu	ugcuccugccugucugaugugcagagucacagcccaucaggcuggcagcagcagu	gcagcgugccgggcugggacagg	ugcuccugccugucugaugugc	aagcagccgagauggggagcagc	ugcuccugccugucugaugugc	gcuccugccugucugaugugc	ugcuccugccugucugaugugc	ugcuccugccugucugaugugc	ugcuccugccugucugaugugc	ugcuccugccugucugaugugc	0	0	0	0	2	0	0	0	0	0	0	0	0	0.23936	0	0	0	0
174	conserve-cli-miR-7356-3p	cucccugcggaucagcacagcgcaccggggagaucuggggaggagga	cucccugcggaucagcacagcgcaccggggagaucuggggaggagga	cucccugcggaucagcacagcgcaccggggagaucuggggaggagga	cucccugcggaucagcacagcgcaccggggagaucuggggaggagga	gggcugagucucgaggaggauugcuguccucaaagaggcaugguauucccu	cucccugcggaucagcacagcgcaccggggagaucuggggaggagga	cucccugcggaucagcacagcgcaccggggagaucuggggaggagga	cucccugcggaucagcacagcgcaccggggagaucuggggaggagga	cucccugcggaucagcacagcgcaccggggagaucuggggaggagga	ggggagaucuggggaggagga	ggggagaucuggggaggagga	ggggagaucuggggaggagga	ggggagaucuggggaggagga	cucaaagaggcaugguauucccu	ggggagaucuggggaggagga	ggggagaucuggggaggagga	ggggagaucuggggaggagga	ggggagaucuggggaggagga	0	0	0	0	3	0	0	0	0	0	0	0	0	0.35904	0	0	0	0
175	conserve-cli-miR-7398g-3p	uaaccuuccaaguugugacauuuugaaauucuaugcugucauacucuggggaggugagc	uaaccuuccaaguugugacauuuugaaauucuaugcugucauacucuggggaggugagcc	uaaccuuccaaguugugacauuuugaaauucuaugcugucauacucuggggaggugagcc	guaauccaaagugugagacauuaaauguuucuugauuaugggggaaaggggagaagacaguucaucucacacuuggcuuuacug	guaauccaaagugugagacauuaaauguuucuugauuaugggggaaaggggagaagacaguucaucucacacuuggcuuuacug	uaaccuuccaaguugugacauuuugaaauucuaugcugucauacucuggggaggugagcc	guaauccaaagugugagacauuaaauguuucuugauuaugggggaaaggggagaagacaguucaucucacacuuggcuuuacug	guaauccaaagugugagacauuaaauguuucuugauuaugggggaaaggggagaagacaguucaucucacacuuggcuuuacug	guaauccaaagugugagacauuaaauguuucuugauuaugggggaaaggggagaagacaguucaucucacacuuggcuuuacug	ugucauacucuggggaggugagc	ugucauacucuggggaggugagcc	ucauacucuggggaggugagcc	caucucacacuuggcuuuacug	caucucacacuuggcuuuacug	ugucauacucuggggaggugagcc	caucucacacuuggcuuuacug	caucucacacuuggcuuuacug	caucucacacuuggcuuuacug	1	0	1	0	0	0	0	0	0	0.121391	0	0.101408	0	0	0	0	0	0
176	conserve-cli-miR-7398g-5p	uaaccuuccaaguugugacauuuugaaauucuaugcugucauacucuggggaggugagc	uaaccuuccaaguugugacauuuugaaauucuaugcugucauacucuggggaggugagcc	uaaccuuccaaguugugacauuuugaaauucuaugcugucauacucuggggaggugagcc	guaauccaaagugugagacauuaaauguuucuugauuaugggggaaaggggagaagacaguucaucucacacuuggcuuuacug	guaauccaaagugugagacauuaaauguuucuugauuaugggggaaaggggagaagacaguucaucucacacuuggcuuuacug	uaaccuuccaaguugugacauuuugaaauucuaugcugucauacucuggggaggugagcc	guaauccaaagugugagacauuaaauguuucuugauuaugggggaaaggggagaagacaguucaucucacacuuggcuuuacug	guaauccaaagugugagacauuaaauguuucuugauuaugggggaaaggggagaagacaguucaucucacacuuggcuuuacug	guaauccaaagugugagacauuaaauguuucuugauuaugggggaaaggggagaagacaguucaucucacacuuggcuuuacug	uaaccuuccaaguugugacauu	uaaccuuccaaguugugacauu	uaaccuuccaaguugugacauu	guaauccaaagugugagacauu	guaauccaaagugugagacauu	uaaccuuccaaguugugacauu	guaauccaaagugugagacauu	guaauccaaagugugagacauu	guaauccaaagugugagacauu	20	24	22	0	0	2	0	0	0	2.42783	3.03914	2.23097	0	0	0.228321	0	0	0
177	conserve-cli-miR-742-5p	gaaagccaagaagccggcagcaacggcggccaagaaagcggcuaagagccccaagaaagcagcuaaggcuucuaagucua	gaaagccaagaagccggcagcaacggcggccaagaaagcggcuaagagccccaagaaagcagcuaaggcuucuaagucua	gaaagccaagaagccggcagcaacggcggccaagaaagcggcuaagagccccaagaaagcagcuaaggcuucuaagucua	gaaagccaagaagccggcagcaacggcggccaagaaagcggcuaagagccccaagaaagcagcuaaggcuucuaagucua	gaaagccaagaagccggcagcaacggcggccaagaaagcggcuaagagccccaagaaagcagcuaaggcuucuaagucua	gaaagccaagaagccggcagcaacggcggccaagaaagcggcuaagagccccaagaaagcagcuaaggcuucuaagucua	gaaagccaagaagccggcagcaacggcggccaagaaagcggcuaagagccccaagaaagcagcuaaggcuucuaagucua	gaaagccaagaagccggcagcaacggcggccaagaaagcggcuaagagccccaagaaagcagcuaaggcuucuaagucua	gaaagccaagaagccggcagcaacggcggccaagaaagcggcuaagagccccaagaaagcagcuaaggcuucuaagucua	gaaagccaagaagccggc	gaaagccaagaagccggc	gaaagccaagaagccggc	gaaagccaagaagccggc	gaaagccaagaagccggc	gaaagccaagaagccggc	gaaagccaagaagccggc	gaaagccaagaagccggc	gaaagccaagaagccggc	3	0	0	0	0	0	0	0	0	0.364174	0	0	0	0	0	0	0	0
178	conserve-cli-miR-7428-3p	aaaaucagucgucaucuugcugcaucuguauucacacaggugaugggcugguuuuca	aaaaucagucgucaucuugcugcaucuguauucacacaggugaugggcugguuuuca	aaaaucagucgucaucuugcugcaucuguauucacacaggugaugggcugguuuuca	aaaaucagucgucaucuugcugcaucuguauucacacaggugaugggcugguuuuca	aaaaucagucgucaucuugcugcaucuguauucacacaggugaugggcugguuuuca	aaaaucagucgucaucuugcugcaucuguauucacacaggugaugggcugguuuuca	aaaaucagucgucaucuugcugcaucuguauucacacaggugaugggcugguuuuca	aaaaucagucgucaucuugcugcaucuguauucacacaggugaugggcugguuuuca	aaaaucagucgucaucuugcugcaucuguauucacacaggugaugggcugguuuuca	cacaggugaugggcugguuuuca	acaggugaugggcugguuuuca	acaggugaugggcugguuuuca	acaggugaugggcugguuuuca	cacacaggugaugggcugguuuuca	acaggugaugggcugguuuuca	acaggugaugggcugguuuuca	acaggugaugggcugguuuuca	acaggugaugggcugguuuuca	1	1	0	0	0	0	0	0	0	0.121391	0.126631	0	0	0	0	0	0	0
179	conserve-cli-miR-7428-5p	aaaaucagucgucaucuugcugcaucuguauucacacaggugaugggcugguuuuca	aaaaucagucgucaucuugcugcaucuguauucacacaggugaugggcugguuuuca	aaaaucagucgucaucuugcugcaucuguauucacacaggugaugggcugguuuuca	aaaaucagucgucaucuugcugcaucuguauucacacaggugaugggcugguuuuca	aaaaucagucgucaucuugcugcaucuguauucacacaggugaugggcugguuuuca	aaaaucagucgucaucuugcugcaucuguauucacacaggugaugggcugguuuuca	aaaaucagucgucaucuugcugcaucuguauucacacaggugaugggcugguuuuca	aaaaucagucgucaucuugcugcaucuguauucacacaggugaugggcugguuuuca	aaaaucagucgucaucuugcugcaucuguauucacacaggugaugggcugguuuuca	aaaaucagucgucaucuugcu	aaaaucagucgucaucuugcu	aaaaucagucgucaucuugcu	aaaaucagucgucaucuugcu	aaaaucagucgucaucuugcu	aaaaucagucgucaucuugcu	aaaaucagucgucaucuugcu	aaaaucagucgucaucuugcu	aaaaucagucgucaucuugcu	3	5	0	0	3	0	0	0	0	0.364174	0.633155	0	0	0.35904	0	0	0	0
180	conserve-cli-miR-7474-3p	cucuccugucaaagugacaaagcacaagaccuugauuggguuguuaggaaaagucauuugugguaguggggga	cucuccugucaaagugacaaagcacaagaccuugauuggguuguuaggaaaagucauuugugguaguggggga	cucuccugucaaagugacaaagcacaagaccuugauuggguuguuaggaaaagucauuugugguaguggggga	cucuccugucaaagugacaaagcacaagaccuugauuggguuguuaggaaaagucauuugugguaguggggga	cucuccugucaaagugacaaagcacaagaccuugauuggguuguuaggaaaagucauuugugguaguggggga	cucuccugucaaagugacaaagcacaagaccuugauuggguuguuaggaaaagucauuugugguaguggggga	cucuccugucaaagugacaaagcacaagaccuugauuggguuguuaggaaaagucauuugugguaguggggga	cucuccugucaaagugacaaagcacaagaccuugauuggguuguuaggaaaagucauuugugguaguggggga	cucuccugucaaagugacaaagcacaagaccuugauuggguuguuaggaaaagucauuugugguaguggggga	auuugugguaguggggga	auuugugguaguggggga	auuugugguaguggggga	auuugugguaguggggga	auuugugguaguggggga	auuugugguaguggggga	auuugugguaguggggga	auuugugguaguggggga	auuugugguaguggggga	6	6	0	0	0	0	0	0	0	0.728348	0.759785	0	0	0	0	0	0	0
181	conserve-cli-miR-757-3p	acagagcucugcaggauccccagaugagggguauggaguugguggcuccauguccagcauggcucugaggguuucucagaggugagcuc	acagagcucugcaggauccccagaugagggguauggaguugguggcuccauguccagcauggcucugaggguuucucagaggugagcuc	gggguuugucgggcucuuuguugcacagguauugaaagagcccuauagagaccaacagagccugacaaacccaac	acagagcucugcaggauccccagaugagggguauggaguugguggcuccauguccagcauggcucugaggguuucucagaggugagcuc	acagagcucugcaggauccccagaugagggguauggaguugguggcuccauguccagcauggcucugaggguuucucagaggugagcuc	acagagcucugcaggauccccagaugagggguauggaguugguggcuccauguccagcauggcucugaggguuucucagaggugagcuc	acagagcucugcaggauccccagaugagggguauggaguugguggcuccauguccagcauggcucugaggguuucucagaggugagcuc	acagagcucugcaggauccccagaugagggguauggaguugguggcuccauguccagcauggcucugaggguuucucagaggugagcuc	acagagcucugcaggauccccagaugagggguauggaguugguggcuccauguccagcauggcucugaggguuucucagaggugagcuc	gguuucucagaggugagcuc	gguuucucagaggugagcuc	acagagccugacaaacccaac	gguuucucagaggugagcuc	gguuucucagaggugagcuc	gguuucucagaggugagcuc	gguuucucagaggugagcuc	gguuucucagaggugagcuc	gguuucucagaggugagcuc	0	0	8	0	0	0	0	0	0	0	0	0.811261	0	0	0	0	0	0
182	conserve-cli-miR-7666-3p	aagcugcugcaguggugccaauggcucagagaaugugcaugcagcacugagcagcuacu	aagcugcugcaguggugccaauggcucagagaaugugcaugcagcacugagcagcuacu	aagcugcugcaguggugccaauggcucagagaaugugcaugcagcacugagcagcuacu	aagcugcugcaguggugccaauggcucagagaaugugcaugcagcacugagcagcuacu	aagcugcugcaguggugccaauggcucagagaaugugcaugcagcacugagcagcuacu	aagcugcugcaguggugccaauggcucagagaaugugcaugcagcacugagcagcuacu	aagcugcugcaguggugccaauggcucagagaaugugcaugcagcacugagcagcuacu	aagcugcugcaguggugccaauggcucagagaaugugcaugcagcacugagcagcuacu	aagcugcugcaguggugccaauggcucagagaaugugcaugcagcacugagcagcuacu	caugcagcacugagcagcuacu	caugcagcacugagcagcuacu	caugcagcacugagcagcuacu	caugcagcacugagcagcuacu	caugcagcacugagcagcuacu	caugcagcacugagcagcuacu	caugcagcacugagcagcuacu	caugcagcacugagcagcuacu	caugcagcacugagcagcuacu	0	0	0	0	0	0	0	0	2	0	0	0	0	0	0	0	0	0.180218
183	conserve-cli-miR-7861-1-5p	ugcuaccuggacugauaaccccagagccuaggucaggguuauuggcucaggcagagca	ugcuaccuggacugauaaccccagagccuaggucaggguuauuggcucaggcagagca	ugcuaccuggacugauaaccccagagccuaggucaggguuauuggcucaggcagagca	ugcuaccuggacugauaaccccagagccuaggucaggguuauuggcucaggcagagca	ugcuaccuggacugauaaccccagagccuaggucaggguuauuggcucaggcagagca	ugcuaccuggacugauaaccccagagccuaggucaggguuauuggcucaggcagagca	ugcuaccuggacugauaaccccagagccuaggucaggguuauuggcucaggcagagca	ugcuaccuggacugauaaccccagagccuaggucaggguuauuggcucaggcagagca	ugcuaccuggacugauaaccccagagccuaggucaggguuauuggcucaggcagagca	ugcuaccuggacugauaaccc	ugcuaccuggacugauaaccc	ugcuaccuggacugauaaccc	ugcuaccuggacugauaaccc	ugcuaccuggacugauaaccc	ugcuaccuggacugauaaccc	ugcuaccuggacugauaacc	ugcuaccuggacugauaaccc	ugcuaccuggacugauaaccc	0	0	0	0	0	0	6	0	0	0	0	0	0	0	0	0.633497	0	0
184	conserve-cli-miR-7861-5p	ugcuaccuggacugauaaccccagagccuaggucaggguuauuggcucaggcagagca	ugcuaccuggacugauaaccccagagccuaggucaggguuauuggcucaggcagagca	ugcuaccuggacugauaaccccagagccuaggucaggguuauuggcucaggcagagca	ugcuaccuggacugauaaccccagagccuaggucaggguuauuggcucaggcagagca	ugcuaccuggacugauaaccccagagccuaggucaggguuauuggcucaggcagagca	ugcuaccuggacugauaaccccagagccuaggucaggguuauuggcucaggcagagca	ugcuaccuggacugauaaccccagagccuaggucaggguuauuggcucaggcagagca	ugcuaccuggacugauaaccccagagccuaggucaggguuauuggcucaggcagagca	ugcuaccuggacugauaaccccagagccuaggucaggguuauuggcucaggcagagca	ugcuaccuggacugauaaccc	ugcuaccuggacugauaaccc	ugcuaccuggacugauaacccc	ugcuaccuggacugauaaccc	ugcuaccuggacugauaaccc	ugcuaccuggacugauaaccc	ugcuaccuggacugauaacc	ugcuaccuggacugauaacc	ugcuaccuggacugauaaccc	19	4	5	25	13	48	6	0	49	2.30644	0.506524	0.507038	3.01139	1.55584	5.4797	0.633497	0	4.41534
185	conserve-cli-miR-7976-1-5p	agcccugaagcugugccacuguucuggggcugcagaugugacagugccacugccacaggggacc	agcccugaagcugugccacuguucuggggcugcagaugugacagugccacugccacaggggacc	agcccugaagcugugccacuguucuggggcugcagaugugacagugccacugccacaggggacc	agcccugaagcugugccacuguucuggggcugcagaugugacagugccacugccacaggggacc	agcccugaagcugugccacuguucuggggcugcagaugugacagugccacugccacaggggacc	agcccugaagcugugccacuguucuggggcugcagaugugacagugccacugccacaggggacc	agcccugaagcugugccacuguucuggggcugcagaugugacagugccacugccacaggggacc	agcccugaagcugugccacuguucuggggcugcagaugugacagugccacugccacaggggacc	agcccugaagcugugccacuguucuggggcugcagaugugacagugccacugccacaggggacc	agcccugaagcugugccacugu	agcccugaagcugugccacugu	agcccugaagcugugccacugu	agcccugaagcugugccacugu	agcccugaagcugugccacugu	agcccugaagcugugccacugu	agcccugaagcugugccacuguu	agcccugaagcugugccacugu	agcccugaagcugugccacugu	0	0	0	0	0	0	4	0	3	0	0	0	0	0	0	0.422331	0	0.270327
186	conserve-cli-miR-7976-5p	agcccugaagcugugccacuguucuggggcugcagaugugacagugccacugccacaggggacc	agcccugaagcugugccacuguucuggggcugcagaugugacagugccacugccacaggggacc	agcccugaagcugugccacuguucuggggcugcagaugugacagugccacugccacaggggacc	agcccugaagcugugccacuguucuggggcugcagaugugacagugccacugccacaggggacc	agcccugaagcugugccacuguucuggggcugcagaugugacagugccacugccacaggggacc	agcccugaagcugugccacuguucuggggcugcagaugugacagugccacugccacaggggacc	agcccugaagcugugccacuguucuggggcugcagaugugacagugccacugccacaggggacc	agcccugaagcugugccacuguucuggggcugcagaugugacagugccacugccacaggggacc	agcccugaagcugugccacuguucuggggcugcagaugugacagugccacugccacaggggacc	agcccugaagcugugccacuguu	agcccugaagcugugccacugu	agcccugaagcugugccacugu	agcccugaagcugugccacuguu	agcccugaagcugugccacugu	agcccugaagcugugccacugu	agcccugaagcugugccacuguu	agcccugaagcugugccacuguu	agcccugaagcugugccacugu	0	2	6	0	12	3	4	0	3	0	0.253262	0.608446	0	1.43616	0.342482	0.422331	0	0.270327
187	conserve-cli-miR-8062-3p	gacucugaaagggauggauucgacagguggcaacagaccaagauugcugguuugucuaacgccuaagagugauugcugcugaguguccc	gacucugaaagggauggauucgacagguggcaacagaccaagauugcugguuugucuaacgccuaagagugauugcugcugaguguccc	gacucugaaagggauggauucgacagguggcaacagaccaagauugcugguuugucuaacgccuaagagugauugcugcugaguguccc	gacucugaaagggauggauucgacagguggcaacagaccaagauugcugguuugucuaacgccuaagagugauugcugcugaguguccc	accuccuuucagaaaguuguagacguuauugcucucuacgacuagcugaaaggagguugu	gacucugaaagggauggauucgacagguggcaacagaccaagauugcugguuugucuaacgccuaagagugauugcugcugaguguccc	gacucugaaagggauggauucgacagguggcaacagaccaagauugcugguuugucuaacgccuaagagugauugcugcugaguguccc	agagugagucuguguggagugugcacagagcaaauccacguggacucacucugc	gacucugaaagggauggauucgacagguggcaacagaccaagauugcugguuugucuaacgccuaagagugauugcugcugaguguccc	gagugauugcugcugaguguccc	gagugauugcugcugaguguccc	gagugauugcugcugaguguccc	gagugauugcugcugaguguccc	cgacuagcugaaaggagguugu	gagugauugcugcugaguguccc	gagugauugcugcugaguguccc	aaauccacguggacucacucugc	gagugauugcugcugaguguccc	0	0	0	0	4	0	0	2	0	0	0	0	0	0.47872	0	0	0.223936	0
188	conserve-cli-miR-8821-3p	ugguaagcucaggcccagcacugcauggaacuggcugcacugugucugagcucagccgu	ugguaagcucaggcccagcacugcauggaacuggcugcacugugucugagcucagccgu	gguaagcucaggcccagcacugcauggaacuggcugcacugugucugagcucagccgu	ugguaagcucaggcccagcacugcauggaacuggcugcacugugucugagcucagccgu	ugguaagcucaggcccagcacugcauggaacuggcugcacugugucugagcucagccgu	ugguaagcucaggcccagcacugcauggaacuggcugcacugugucugagcucagccgu	ugguaagcucaggcccagcacugcauggaacuggcugcacugugucugagcucagccgu	ugguaagcucaggcccagcacugcauggaacuggcugcacugugucugagcucagccgu	ugguaagcucaggcccagcacugcauggaacuggcugcacugugucugagcucagccgu	cacugugucugagcucagccgu	cacugugucugagcucagccgu	cacugugucugagcucagccgu	cacugugucugagcucagccgu	cacugugucugagcucagccgu	cacugugucugagcucagccgu	cacugugucugagcucagccgu	cacugugucugagcucagccgu	cacugugucugagcucagccgu	0	4	5	0	0	0	0	0	0	0	0.506524	0.507038	0	0	0	0	0	0
189	conserve-cli-miR-885-5p	cggcagcagggugagcugcggcagcagacgccugaggugccgcc	ucuggcacagcucagccgcgcaccugagcuaacacgggcggcugagccgcugccagcgc	cggcagcagggugagcugcggcagcagacgccugaggugccgcc	cggcagcagggugagcugcggcagcagacgccugaggugccgcc	cggcagcagggugagcugcggcagcagacgccugaggugccgcc	cggcagcagggugagcugcggcagcagacgccugaggugccgcc	cggcagcagggugagcugcggcagcagacgccugaggugccgcc	cggcagcagggugagcugcggcagcagacgccugaggugccgcc	cggcagcagggugagcugcggcagcagacgccugaggugccgcc	cggcagcagggugagcug	ucuggcacagcucagccgcgc	cggcagcagggugagcug	cggcagcagggugagcug	cggcagcagggugagcug	cggcagcagggugagcug	cggcagcagggugagcug	cggcagcagggugagcug	cggcagcagggugagcug	0	2	0	0	0	0	0	0	0	0	0.253262	0	0	0	0	0	0	0
190	conserve-cli-miR-8866-3p	gucugggcuuuuguaggugcuaaaaccgagcccagcugugagcucacaccu	gucugggcuuuuguaggugcuaaaaccgagcccagcugugagcucacaccu	gggggcuugugcuuaucugcagugccuaugguccaccagcugagcugcaagcacccau	gucugggcuuuuguaggugcuaaaaccgagcccagcugugagcucacaccu	gucugggcuuuuguaggugcuaaaaccgagcccagcugugagcucacaccu	gucugggcuuuuguaggugcuaaaaccgagcccagcugugagcucacaccu	gucugggcuuuuguaggugcuaaaaccgagcccagcugugagcucacaccu	gucugggcuuuuguaggugcuaaaaccgagcccagcugugagcucacaccu	gucugggcuuuuguaggugcuaaaaccgagcccagcugugagcucacaccu	cccagcugugagcucacaccu	cccagcugugagcucacaccu	ccagcugagcugcaagcacccau	cccagcugugagcucacaccu	cccagcugugagcucacaccu	cccagcugugagcucacaccu	cccagcugugagcucacaccu	cccagcugugagcucacaccu	cccagcugugagcucacaccu	0	0	2	0	0	0	0	0	0	0	0	0.202815	0	0	0	0	0	0
191	conserve-cli-miR-8873a-1-3p	gaauaaagaggcuucagucuugcuuuguuugugcauuccugaagugucuguuccc	gaauaaagaggcuucagucuugcuuuguuugugcauuccugaagugucuguuccc	gaauaaagaggcuucagucuugcuuuguuugugcauuccugaagugucuguuccc	gaauaaagaggcuucagucuugcuuuguuugugcauuccugaagugucuguuccc	gaauaaagaggcuucagucuugcuuuguuugugcauuccugaagugucuguuccc	gaauaaagaggcuucagucuugcuuuguuugugcauuccugaagugucuguuccc	gaauaaagaggcuucagucuugcuuuguuugugcauuccugaagugucuguuccc	gaauaaagaggcuucagucuugcuuuguuugugcauuccugaagugucuguuccc	gaauaaagaggcuucagucuugcuuuguuugugcauuccugaagugucuguuccc	uccugaagugucuguuccc	uccugaagugucuguuccc	uccugaagugucuguuccc	uccugaagugucuguuccc	uccugaagugucuguuccc	uccugaagugucuguuccc	uccugaagugucuguuccc	uccugaagugucuguuccc	uccugaagugucuguuccc	0	0	0	0	0	0	3	0	0	0	0	0	0	0	0	0.316748	0	0
192	conserve-cli-miR-9030-3p	cucucuggcgguccugugucugccaggugaccucccuggaacagggacuggccagagcugg	ugugcugucccauggccucugugugccuuuagcugcccucccuguugcucuggcucugcacacagaggacaaggacagagcugg	ugugcugucccauggccucugugugccuuuagcugcccucccuguugcucuggcucugcacacagaggacaaggacagagcugg	cucucuggcgguccugugucugccaggugaccucccuggaacagggacuggccagagcugg	cucucuggcgguccugugucugccaggugaccucccuggaacagggacuggccagagcugg	cucucuggcgguccugugucugccaggugaccucccuggaacagggacuggccagagcugg	cucucuggcgguccugugucugccaggugaccucccuggaacagggacuggccagagcugg	ugugcugucccauggccucugugugccuuuagcugcccucccuguugcucuggcucugcacacagaggacaaggacagagcugg	cucucuggcgguccugugucugccaggugaccucccuggaacagggacuggccagagcugg	gaacagggacuggccagagcugg	cacagaggacaaggacagagcugg	cacagaggacaaggacagagcugg	gaacagggacuggccagagcugg	gaacagggacuggccagagcugg	gaacagggacuggccagagcugg	gaacagggacuggccagagcugg	cacagaggacaaggacagagcugg	gaacagggacuggccagagcugg	6	15	9	0	0	0	0	9	0	0.728348	1.89946	0.912668	0	0	0	0	1.00771	0
193	conserve-cli-miR-9073-5p	ugagugaagugcuugucaagucuuucaugcugguuggccuugaggguauuuucacuccuc	ugagugaagugcuugucaagucuuucaugcugguuggccuugaggguauuuucacuccuc	ugagugaagugcuugucaagucuuucaugcugguuggccuugaggguauuuucacuccuc	ugagugaagugcuugucaagucuuucaugcugguuggccuugaggguauuuucacuccuc	ugagugaagugcuugucaagucuuucaugcugguuggccuugaggguauuuucacuccuc	ugagugaagugcuugucaagucuuucaugcugguuggccuugaggguauuuucacuccuc	ugagugaagugcuugucaagucuuucaugcugguuggccuugaggguauuuucacuccuc	ugagugaagugcuugucaagucuuucaugcugguuggccuugaggguauuuucacuccuc	ugagugaagugcuugucaagucuuucaugcugguuggccuugaggguauuuucacuccuc	ugagugaagugcuugucaaguc	ugagugaagugcuugucaaguc	ugagugaagugcuugucaaguc	ugagugaagugcuugucaaguc	ugagugaagugcuugucaaguc	ugagugaagugcuugucaaguc	ugagugaagugcuugucaaguc	ugagugaagugcuugucaaguc	ugagugaagugcuugucaaguc	49	0	42	0	5	6	6	5	6	5.94818	0	4.25912	0	0.5984	0.684963	0.633497	0.55984	0.540653
194	conserve-cli-miR-9077-3p	gcccugugccuucagcccaaggggucugagggacagucugcuc	cccugugccuucagcccaaggggucugagggacagucugcu	cccugugccuucagcccaaggggucugagggacagucugcu	ucugagggacagucugcuccugggcuggagguguacuucuuucuguuugccaccccaauccaagcaaccuucccuagucc	cccugugccuucagcccaaggggucugagggacagucugcu	cccugugccuucagcccaaggggucugagggacagucugcu	cccugugccuucagcccaaggggucugagggacagucugcu	cccugugccuucagcccaaggggucugagggacagucugcu	cccugugccuucagcccaaggggucugagggacagucugcu	ucugagggacagucugcuc	ucugagggacagucugcu	ucugagggacagucugcu	caaccuucccuagucc	ucugagggacagucugcu	ucugagggacagucugcu	ucugagggacagucugcu	ucugagggacagucugcu	ucugagggacagucugcu	2	0	0	0	2	0	0	0	0	0.242783	0	0	0	0.23936	0	0	0	0
195	conserve-cli-miR-9077-5p	gcccugugccuucagcccaaggggucugagggacagucugcuc	cccugugccuucagcccaaggggucugagggacagucugcu	cccugugccuucagcccaaggggucugagggacagucugcu	ucugagggacagucugcuccugggcuggagguguacuucuuucuguuugccaccccaauccaagcaaccuucccuagucc	cccugugccuucagcccaaggggucugagggacagucugcu	cccugugccuucagcccaaggggucugagggacagucugcu	cccugugccuucagcccaaggggucugagggacagucugcu	cccugugccuucagcccaaggggucugagggacagucugcu	cccugugccuucagcccaaggggucugagggacagucugcu	gcccugugccuucagccc	cccugugccuucagccc	cccugugccuucagccc	ucugagggacagucugcu	cccugugccuucagccc	cccugugccuucagccc	cccugugccuucagccc	cccugugccuucagccc	cccugugccuucagccc	0	0	0	3	0	0	0	0	0	0	0	0	0.361366	0	0	0	0	0
196	conserve-cli-miR-9085-3p	aaauaauugguuuauuaaagcuguaugugcaagagccuuuaaugauccaauuguuucu	aaauaauugguuuauuaaagcuguaugugcaagagccuuuaaugauccaauuguuucu	aaauaauugguuuauuaaagcuguaugugcaagagccuuuaaugauccaauuguuucu	aaauaauugguuuauuaaagcuguaugugcaagagccuuuaaugauccaauuguuucu	aaauaauugguuuauuaaagcuguaugugcaagagccuuuaaugauccaauuguuucu	aaauaauugguuuauuaaagcuguaugugcaagagccuuuaaugauccaauuguuucu	aaauaauugguuuauuaaagcuguaugugcaagagccuuuaaugauccaauuguuucu	aaauaauugguuuauuaaagcuguaugugcaagagccuuuaaugauccaauuguuucu	aaauaauugguuuauuaaagcuguaugugcaagagccuuuaaugauccaauuguuucu	uuuaaugauccaauuguuucu	uuuaaugauccaauuguuucu	uuuaaugauccaauuguuucu	uuuaaugauccaauuguuucu	ccuuuaaugauccaauuguuucu	uuuaaugauccaauuguuucu	uuuaaugauccaauuguuucu	uuuaaugauccaauuguuucu	uuuaaugauccaauuguuucu	0	0	0	0	5	0	0	0	0	0	0	0	0	0.5984	0	0	0	0
197	conserve-cli-miR-9245-3p	uugcugcugcagaauccagcccguuccgcagugcugagccccgcggcaggguccaggcugaggcugcaaug	uugcugcugcagaauccagcccguuccgcagugcugagccccgcggcaggguccaggcugaggcugcaaug	uugcugcugcagaauccagcccguuccgcagugcugagccccgcggcaggguccaggcugaggcugcaaug	uugcugcugccagucaauaaaaggaauuggacugaagugcaacu	uugcugcugcagaauccagcccguuccgcagugcugagccccgcggcaggguccaggcugaggcugcaaug	uugcugcugcagaauccagcccguuccgcagugcugagccccgcggcaggguccaggcugaggcugcaaug	uugcugcugcagaauccagcccguuccgcagugcugagccccgcggcaggguccaggcugaggcugcaaug	uugcugcugcagaauccagcccguuccgcagugcugagccccgcggcaggguccaggcugaggcugcaaug	uugcugcugcagaauccagcccguuccgcagugcugagccccgcggcaggguccaggcugaggcugcaaug	uccaggcugaggcugcaaug	uccaggcugaggcugcaaug	uccaggcugaggcugcaaug	uuggacugaagugcaacu	uccaggcugaggcugcaaug	uccaggcugaggcugcaaug	uccaggcugaggcugcaaug	uccaggcugaggcugcaaug	uccaggcugaggcugcaaug	0	0	0	4	0	0	0	0	0	0	0	0	0.481822	0	0	0	0	0
198	conserve-cli-miR-9307-5p	gucugcaggauccugaacccaggugugcccgaguuggggucaugaaccugcgggaag	gucugcaggauccugaacccaggugugcccgaguuggggucaugaaccugcgggaag	gucugcaggauccugaacccaggugugcccgaguuggggucaugaaccugcgggaag	gucugcaggauccugaacccaggugugcccgaguuggggucaugaaccugcgggaag	gucugcaggauccugaacccaggugugcccgaguuggggucaugaaccugcgggaag	gucugcaggauccugaacccaggugugcccgaguuggggucaugaaccugcgggaag	gucugcaggauccugaacccaggugugcccgaguuggggucaugaaccugcgggaag	gucugcaggauccugaacccaggugugcccgaguuggggucaugaaccugcgggaag	gucugcaggauccugaacccaggugugcccgaguuggggucaugaaccugcgggaag	gucugcaggauccugaaccca	gucugcaggauccugaaccca	gucugcaggauccugaaccca	gucugcaggauccugaaccca	gucugcaggauccugaaccca	gucugcaggauccugaaccca	gucugcaggauccugaaccca	gucugcaggauccugaaccca	gucugcaggauccugaaccca	6	8	6	0	0	0	0	0	0	0.728348	1.01305	0.608446	0	0	0	0	0	0
199	conserve-cli-miR-940-1-3p	gugagugccagcugugccugacccuuugccccaagugagcuaggcaggaauggcacucaagg	ugagugccagcugugccugacccuuugccccaagugagcuaggcaggaauggcacucaag	gugagugccagcugugccugacccuuugccccaagugagcuaggcaggaauggcacucaagg	gugagugccagcugugccugacccuuugccccaagugagcuaggcaggaauggcacucaagg	gugagugccagcugugccugacccuuugccccaagugagcuaggcaggaauggcacucaagg	gugagugccagcugugccugacccuuugccccaagugagcuaggcaggaauggcacucaagg	gugucagugacugucuugacuaaaacacagaucucugggacug	gugagugccagcugugccugacccuuugccccaagugagcuaggcaggaauggcacucaagg	gugagugccagcugugccugacccuuugccccaagugagcuaggcaggaauggcacucaagg	uaggcaggaauggcacucaagg	uaggcaggaauggcacucaag	uaggcaggaauggcacucaagg	uaggcaggaauggcacucaagg	uaggcaggaauggcacucaagg	uaggcaggaauggcacucaagg	aaacacagaucucugggacug	uaggcaggaauggcacucaagg	uaggcaggaauggcacucaagg	6	5	0	0	0	0	3	0	0	0.728348	0.633155	0	0	0	0	0.316748	0	0
200	conserve-cli-miR-940-3p	gugagugccagcugugccugacccuuugccccaagugagcuaggcaggaauggcacucaagg	ugagugccagcugugccugacccuuugccccaagugagcuaggcaggaauggcacucaag	ugagugccagcugugccugacccuuugccccaagugagcuaggcaggaauggcacucaag	ugagugccagcugugccugacccuuugccccaagugagcuaggcaggaauggcacucaag	ugagugccagcugugccugacccuuugccccaagugagcuaggcaggaauggcacucaag	ugagugccagcugugccugacccuuugccccaagugagcuaggcaggaauggcacucaag	ugagugccagcugugccugacccuuugccccaagugagcuaggcaggaauggcacucaag	ugagugccagcugugccugacccuuugccccaagugagcuaggcaggaauggcacucaag	ugagugccagcugugccugacccuuugccccaagugagcuaggcaggaauggcacucaag	uaggcaggaauggcacucaagg	uaggcaggaauggcacucaag	uaggcaggaauggcacucaag	uaggcaggaauggcacucaag	uaggcaggaauggcacucaag	uaggcaggaauggcacucaag	uaggcaggaauggcacucaag	uaggcaggaauggcacucaag	uaggcaggaauggcacucaag	6	5	0	0	0	0	0	0	0	0.728348	0.633155	0	0	0	0	0	0	0
201	conserve-cli-miR-9899-5p	ugggcgccagggcucugcggguccaacacgcuggcgaacacccgaaagcccauggaguccaag	ugggcgccagggcucugcggguccaacacgcuggcgaacacccgaaagcccauggaguccaag	ugggcgccagggcucugcggguccaacacgcuggcgaacacccgaaagcccauggaguccaag	ugggcgccagggcucugcggguccaacacgcuggcgaacacccgaaagcccauggaguccaag	uggcccagggcaucgggccaaacucuucucugcugagcagaggaggaggguggagggcugggguuaggggaga	ugggcgccagggcucugcggguccaacacgcuggcgaacacccgaaagcccauggaguccaag	ugggcgccagggcucugcggguccaacacgcuggcgaacacccgaaagcccauggaguccaag	ugggcgccagggcucugcggguccaacacgcuggcgaacacccgaaagcccauggaguccaag	ugggcgccagggcucugcggguccaacacgcuggcgaacacccgaaagcccauggaguccaag	ugggcgccagggcucugcgggu	ugggcgccagggcucugcgggu	ugggcgccagggcucugcgggu	ugggcgccagggcucugcgggu	uggcccagggcaucgggc	ugggcgccagggcucugcgggu	ugggcgccagggcucugcgggu	ugggcgccagggcucugcgggu	ugggcgccagggcucugcgggu	0	0	0	0	2	0	0	0	0	0	0	0	0	0.23936	0	0	0	0
