# Supplementary material for: Identification and expression pattern analysis of miRNAs in pectoral muscle during pigeon (Columba livia) development
Source: PeerJ. 2021 Jun 23;9:e11438. doi: 10.7717/peerj.11438 (PMC8234919; doi:10.7717/peerj.11438)
Supplement: Supplemental Information 6 [file peerj-09-11438-s006.xlsx]

## Sheet: Sheet1
Table S5. Novel miRNA group identified in this study.
ID	miR Name	Pre-miRNA sequence									Sequence of mature miRNAs									Expression of mature miRNAs (Read Counts)									Expression of mature miRNAs (RPM)
	miR Name	1d_1	1d_2	1d_3	28d_1	28d_2	28d_3	2yr_1	2yr_2	2yr_3	1d_1	1d_2	1d_3	28d_1	28d_2	28d_3	2yr_1	2yr_2	2yr_3	1d_1	1d_2	1d_3	28d_1	28d_2	28d_3	2yr_1	2yr_2	2yr_3	1d_1	1d_2	1d_3	28d_1	28d_2	28d_3	2yr_1	2yr_2	2yr_3
1	novel-cli-miR-103-3p	cuaagcacauggauggagguuuguaggcaguuugaaagaguaagagugcuuacaucucccucgugcuuugca	cuaagcacauggauggagguuuguaggcaguuugaaagaguaagagugcuuacaucucccucgugcuuugca	cuaagcacauggauggagguuuguaggcaguuugaaagaguaagagugcuuacaucucccucgugcuuugca	cuaagcacauggauggagguuuguaggcaguuugaaagaguaagagugcuuacaucucccucgugcuuugca	cuaagcacauggauggagguuuguaggcaguuugaaagaguaagagugcuuacaucucccucgugcuuugca	cuaagcacauggauggagguuuguaggcaguuugaaagaguaagagugcuuacaucucccucgugcuuugca	aagcagaauggaugggguuuguggcaggaaggaucagcagcccaguucguuccgcucc	cuaagcacauggauggagguuuguaggcaguuugaaagaguaagagugcuuacaucucccucgugcuuugca	cuaagcacauggauggagguuuguaggcaguuugaaagaguaagagugcuuacaucucccucgugcuuugca	uuacaucucccucgugcuuugca	uuacaucucccucgugcuuugca	uuacaucucccucgugcuuugca	uuacaucucccucgugcuuugca	uuacaucucccucgugcuuugca	uuacaucucccucgugcuuugca	cagcccaguucguuccgcucc	uuacaucucccucgugcuuugca	uuacaucucccucgugcuuugca	0	0	0	0	0	0	3	0	0	0	0	0	0	0	0	0.316748	0	0
2	novel-cli-miR-104-3p	uuucaaaaagguggaccuaauuucugcgaaaacuugaguucaaauuagguccgucuuuuugaaac	uuucaaaaagguggaccuaauuugaaauuugacauaauuugaaauuggauccauccuuuugaaac	uuucaaaaagguggaccuaauuucugcgaaaacuugaguucaaauuagguccgucuuuuugaaac	uuucaaaaagguggaccuaauuucugcgaaaacuugaguucaaauuagguccgucuuuuugaaac	uuucaaaaagguggaccuaauuucugcgaaaacuugaguucaaauuagguccgucuuuuugaaac	uuucaaaaagguggaccuaauuucugcgaaaacuugaguucaaauuagguccgucuuuuugaaaca	uucaaaaagauagacccaguuucaaagcaguaugaguucaaauuuugguccaucuuuuugaaau	uuucaaaaagguggaccuaauuucugcgaaaacuugaguucaaauuagguccgucuuuuugaaac	uuucaaaaagguggaccuaauuucugcgaaaacuugaguucaaauuagguccgucuuuuugaaac	uuagguccgucuuuuugaaac	uuggauccauccuuuugaaac	uuagguccgucuuuuugaaac	uuagguccgucuuuuugaaac	uuagguccgucuuuuugaaac	uuagguccgucuuuuugaaaca	uuugguccaucuuuuugaaau	uuagguccgucuuuuugaaac	uuagguccgucuuuuugaaac	0	1	0	0	1	2	4	0	0	0	0.126631	0	0	0.11968	0.228321	0.422331	0	0
3	novel-cli-miR-104-5p	uuucaaaaagguggaccuaauuucugcgaaaacuugaguucaaauuagguccgucuuuuugaaac	uuucaaaaagguggaccuaauuugaaauuugacauaauuugaaauuggauccauccuuuugaaac	uuucaaaaagguggaccuaauuucugcgaaaacuugaguucaaauuagguccgucuuuuugaaac	uuucaaaaagguggaccuaauuucugcgaaaacuugaguucaaauuagguccgucuuuuugaaac	uuucaaaaagguggaccuaauuucugcgaaaacuugaguucaaauuagguccgucuuuuugaaac	uuucaaaaagguggaccuaauuucugcgaaaacuugaguucaaauuagguccgucuuuuugaaaca	uucaaaaagauagacccaguuucaaagcaguaugaguucaaauuuugguccaucuuuuugaaau	uuucaaaaagguggaccuaauuucugcgaaaacuugaguucaaauuagguccgucuuuuugaaac	uuucaaaaagguggaccuaauuucugcgaaaacuugaguucaaauuagguccgucuuuuugaaac	uuucaaaaagguggaccuaauu	uuucaaaaagguggaccuaauu	uuucaaaaagguggaccuaauu	uuucaaaaagguggaccuaauu	uuucaaaaagguggaccuaauu	uuucaaaaagguggaccuaauu	uucaaaaagauagacccagu	uuucaaaaagguggaccuaauu	uuucaaaaagguggaccuaauu	0	5	0	0	3	2	0	0	0	0	0.633155	0	0	0.35904	0.228321	0	0	0
4	novel-cli-miR-105-3p	gcugggaugcaguggaucuguggggcacccuggaacaggacccccagccccacagcagcccugggaggcug	gcugggaugcaguggaucuguggggcacccuggaacaggacccccagccccacagcagcccugggaggcug	gcugggaugcaguggaucuguggggcacccuggaacaggacccccagccccacagcagcccugggaggcug	gcugggaugcaguggaucuguggggcacccuggaacaggacccccagccccacagcagcccugggaggcug	gcugggaugcaguggaucuguggggcacccuggaacaggacccccagccccacagcagcccugggaggcug	aaacaggcgccuggaggcugcgggugagggcggcgcugaggcaccggcgugucuccaugggcagguggga	gcugggaugcaguggaucuguggggcacccuggaacaggacccccagccccacagcagcccugggaggcug	gcaugcccuggggggcgggagcggccucugcgcgugcgcgcauguggcgggggggggggggcgggcgcccgcgggggcggggggg	gcugggaugcaguggaucuguggggcacccuggaacaggacccccagccccacagcagcccugggaggcug	acagcagcccugggaggcug	acagcagcccugggaggcug	acagcagcccugggaggcug	acagcagcccugggaggcug	acagcagcccugggaggcug	gucuccaugggcagguggga	acagcagcccugggaggcug	cccgcgggggcggggggg	acagcagcccugggaggcug	0	0	0	0	0	0	0	8	0	0	0	0	0	0	0	0	0.895744	0
5	novel-cli-miR-107-5p	gccuggugggcuuacuuuuuuucuuugcaauauucagguuucauuccuuauauauugucucacuaguaagcgugccucug	gccuggugggcuuacuuuuuuucuuugcaauauucagguuucauuccuuauauauugucucacuaguaagcgugccucug	gccuggugggcuuacuuuuuuucuuugcaauauucagguuucauuccuuauauauugucucacuaguaagcgugccucug	gccuggugggcuuacuuuuuuucuuugcaauauucagguuucauuccuuauauauugucucacuaguaagcgugccucug	gccuggugggcuuacuuuuuuucuuugcaauauucagguuucauuccuuauauauugucucacuaguaagcgugccucug	gccuggugggcuuacuuuuuuucuuugcaauauucagguuucauuccuuauauauugucucacuaguaagcgugccucug	gccuggugggcuuacuuuuuuucuuugcaauauucagguuucauuccuuauauauugucucacuaguaagcgugccucug	gccuggugggcuuacuuuuuuucuuugcaauauucagguuucauuccuuauauauugucucacuaguaagcgugccucug	gccuggugggcuuacuuuuuuucuuugcaauauucagguuucauuccuuauauauugucucacuaguaagcgugccucug	gccuggugggcuuacuuuu	gccuggugggcuuacuuuu	gccuggugggcuuacuuuu	gccuggugggcuuacuuuu	gccuggugggcuuacuuuu	gccuggugggcuuacuuuu	gccuggugggcuuacuuuu	gccuggugggcuuacuuuu	gccuggugggcuuacuuuu	2365	0	0	103	43	104	52	89	25	287.091	0	0	12.4069	5.14624	11.8727	5.49031	9.96515	2.25272
6	novel-cli-miR-110-3p	ggauacucacagcaucuggcucagugagauacuguaguucugacuuagaugcucugaauaucccu	aggauacucacagcaucuggcucagugagauacuguaguucugacuuagaugcucugaauaucccu	aggauacucacagcaucuggcucagugagauacuguaguucugacuuagaugcucugaauaucccu	aggauacucacagcaucuggcucagugagauacuguaguucugacuuagaugcucugaauaucccu	aggauacucacagcaucuggcucagugagauacuguaguucugacuuagaugcucugaauaucccu	aggauacucacagcaucuggcucagugagauacuguaguucugacuuagaugcucugaauaucccu	aggauacucacagcaucuggcucagugagauacuguaguucugacuuagaugcucugaauaucccu	aggauacucacagcaucuggcucagugagauacuguaguucugacuuagaugcucugaauaucccu	aggauacucacagcaucuggcucagugagauacuguaguucugacuuagaugcucugaauaucccu	cuuagaugcucugaauaucccu	cuuagaugcucugaauaucccu	cuuagaugcucugaauaucccu	cuuagaugcucugaauaucccu	cuuagaugcucugaauaucccu	cuuagaugcucugaauaucccu	cuuagaugcucugaauaucccu	cuuagaugcucugaauaucccu	cuuagaugcucugaauaucccu	13	0	0	0	12	0	0	0	0	1.57809	0	0	0	1.43616	0	0	0	0
7	novel-cli-miR-111-3p	ggugggcagagggugucaggcaggcuccccccgcccagucccugccugacacacucucuguacccc	ggugggcagagggugucaggcaggcuccccccgcccagucccugccugacacacucucuguacccc	ggugggcagagggugucaggcaggcuccccccgcccagucccugccugacacacucucuguacccc	ggugggcagagggugucaggcaggcuccccccgcccagucccugccugacacacucucuguacccc	ggugggcagagggugucaggcaggcuccccccgcccagucccugccugacacacucucuguacccc	ggugggcagagggugucaggcaggcuccccccgcccagucccugccugacacacucucuguacccc	ggugggcagagggugucaggcaggcuccccccgcccagucccugccugacacacucucuguacccc	agggcggcuaugaggggaggaggcugcuguuccuccccccuucucccccacagacgcucacu	agggcggcuaugaggggaggaggcugcuguuccuccccccuucucccccacagacgcucacu	ugccugacacacucucuguacccc	ugccugacacacucucuguacccc	ugccugacacacucucuguacccc	ugccugacacacucucuguacccc	ugccugacacacucucuguacccc	ugccugacacacucucuguacccc	ugccugacacacucucuguacccc	uucucccccacagacgcucacu	uucucccccacagacgcucacu	0	0	0	0	0	0	0	3	2	0	0	0	0	0	0	0	0.335904	0.180218
8	novel-cli-miR-112-3p	agcccagcuccagcacugcuaccagcagcggcugcu	agcccagcuccagcacugcuaccagcagcggcugcu	agccccagcugagcagccugggcucagaguaaacuccucaggacugcucagccagagcugc	agcccagcuccagcacugcuaccagcagcggcugcu	agcccagcuccagcacugcuaccagcagcggcugcu	agcccagcuccagcacugcuaccagcagcggcugcu	agcccagcuccagcacugcuaccagcagcggcugcu	agcccagcuccagcacugcuaccagcagcggcugcu	agcccagcuccagcacugcuaccagcagcggcugcu	cuaccagcagcggcugcu	cuaccagcagcggcugcu	caggacugcucagccagagcugc	cuaccagcagcggcugcu	cuaccagcagcggcugcu	cuaccagcagcggcugcu	cuaccagcagcggcugcu	cuaccagcagcggcugcu	cuaccagcagcggcugcu	0	0	5	0	0	0	0	0	0	0	0	0.507038	0	0	0	0	0	0
9	novel-cli-miR-113-3p	accuccuuucagaaaguuguagacguuauugcucucuacgacuagcugaaaggagguugu	accuccuuucagaaaguuguagacguuauugcucucuacgacuagcugaaaggagguugu	accuccuuucagaaaguuguagacguuauugcucucuacgacuagcugaaaggagguugu	accuccuuucagaaaguuguagacguuauugcucucuacgacuagcugaaaggagguugu	accuccuuucagaaaguuguagacguuauugcucucuacgacuagcugaaaggagguugu	accuccuuucagaaaguuguagacguuauugcucucuacgacuagcugaaaggagguugu	accuccuuucagaaaguuguagacguuauugcucucuacgacuagcugaaaggagguugu	accuccuuucagaaaguuguagacguuauugcucucuacgacuagcugaaaggagguugu	accuccuuucagaaaguuguagacguuauugcucucuacgacuagcugaaaggagguugu	cgacuagcugaaaggagguugu	cgacuagcugaaaggagguugu	cgacuagcugaaaggagguugu	cgacuagcugaaaggagguugu	cgacuagcugaaaggagguugu	cgacuagcugaaaggagguugu	cgacuagcugaaaggagguugu	cgacuagcugaaaggagguugu	cgacuagcugaaaggagguugu	0	0	0	0	4	0	0	0	0	0	0	0	0	0.47872	0	0	0	0
10	novel-cli-miR-114-3p	ugcugcaaaagcaauugcugcaaugaagaccuucuguugcagcaauugcuuuugcagcagu	ugcugcaaaagcaauugcugcaaugaagaccuucuguugcagcaauugcuuuugcagcagu	cugcugcaaaagcaauugcugcaaugaagaccuucuguugcagcaauugcuuuugcagcagu	ugcugcaaaagcaauugcugcaaugaagaccuucuguugcagcaauugcuuuugcagcagu	acugcugcaaaagcaauugcugcaaugaagaccuucuguugcagcaauugcuuuugcagcagu	ugcugcaaaagcaauugcugcaaugaagaccuucuguugcagcaauugcuuuugcagcagu	cugcaaaagcaauugcugcaaugaagaccuucuguugcagcaauugcuuuugcagcagu	ugcugcaaaagcaauugcugcaaugaagaccuucuguugcagcaauugcuuuugcagcagu	ugcugcaaaagcaauugcugcaaugaagaccuucuguugcagcaauugcuuuugcagcagu	cagcaauugcuuuugcagcagu	cagcaauugcuuuugcagcagu	cagcaauugcuuuugcagcagu	cagcaauugcuuuugcagcagu	cagcaauugcuuuugcagcagu	cagcaauugcuuuugcagcagu	cagcaauugcuuuugcagcagu	cagcaauugcuuuugcagcagu	cagcaauugcuuuugcagcagu	0	0	17	12	9	12	10	15	19	0	0	1.72393	1.44547	1.07712	1.36993	1.05583	1.67952	1.71207
11	novel-cli-miR-114-5p	ugcugcaaaagcaauugcugcaaugaagaccuucuguugcagcaauugcuuuugcagcagu	ugcugcaaaagcaauugcugcaaugaagaccuucuguugcagcaauugcuuuugcagcagu	cugcugcaaaagcaauugcugcaaugaagaccuucuguugcagcaauugcuuuugcagcagu	ugcugcaaaagcaauugcugcaaugaagaccuucuguugcagcaauugcuuuugcagcagu	acugcugcaaaagcaauugcugcaaugaagaccuucuguugcagcaauugcuuuugcagcagu	ugcugcaaaagcaauugcugcaaugaagaccuucuguugcagcaauugcuuuugcagcagu	cugcaaaagcaauugcugcaaugaagaccuucuguugcagcaauugcuuuugcagcagu	ugcugcaaaagcaauugcugcaaugaagaccuucuguugcagcaauugcuuuugcagcagu	ugcugcaaaagcaauugcugcaaugaagaccuucuguugcagcaauugcuuuugcagcagu	ugcugcaaaagcaauugcugc	ugcugcaaaagcaauugcugc	cugcugcaaaagcaauugcug	ugcugcaaaagcaauugcugc	acugcugcaaaagcaauugcug	ugcugcaaaagcaauugcugc	cugcaaaagcaauugcugcaau	ugcugcaaaagcaauugcugc	ugcugcaaaagcaauugcug	0	0	2	1	4	1	1	7	2	0	0	0.202815	0.120455	0.47872	0.114161	0.105583	0.783776	0.180218
12	novel-cli-miR-115-5p	cagccggcucaggugcaucugcgcacucaguguacagagaccaucugggaaaguguuggu	agauccgccuggggcggccuggaaaugcuggugguaccagccggcucaggugcaucugc	agauccgccuggggcggccuggaaaugcuggugguaccagccggcucaggugcaucugc	agauccgccuggggcggccuggaaaugcuggugguaccagccggcucaggugcaucugc	agauccgccuggggcggccuggaaaugcuggugguaccagccggcucaggugcaucugc	agauccgccuggggcggccuggaaaugcuggugguaccagccggcucaggugcaucugc	cagccggcucaggugcaucugcgcacucaguguacagagaccaucugggaaaguguuggu	agauccgccuggggcggccuggaaaugcuggugguaccagccggcucaggugcaucugc	agauccgccuggggcggccuggaaaugcuggugguaccagccggcucaggugcaucugc	cagccggcucaggugcaucugc	agauccgccuggggcggccugga	agauccgccuggggcggccugga	agauccgccuggggcggccugga	agauccgccuggggcggccugga	agauccgccuggggcggccugga	cagccggcucaggugcaucugc	agauccgccuggggcggccugga	agauccgccuggggcggccugga	21	0	0	0	0	0	9	0	0	2.54922	0	0	0	0	0	0.950245	0	0
13	novel-cli-miR-119-5p	aaaagagaaaaggaggcugugggugguaccugcaccacggccaccucuucuucgucuu	aaaagagaaaaggaggcugugggugguaccugcaccacggccaccucuucuucgucuu	aaaagagaaaaggaggcugugggugguaccugcaccacggccaccucuucuucgucuu	aaaagagaaaaggaggcugugggugguaccugcaccacggccaccucuucuucgucuu	aaaagagaaaaggaggcugugggugguaccugcaccacggccaccucuucuucgucuu	aaaagagaaaaggaggcugugggugguaccugcaccacggccaccucuucuucgucuu	aaaagagaaaaggaggcugugggugguaccugcaccacggccaccucuucuucgucuu	aaaagagaaaaggaggcugugggugguaccugcaccacggccaccucuucuucgucuu	aaaagagaaaaggaggcugugggugguaccugcaccacggccaccucuucuucgucuu	aaaagagaaaaggaggcugugg	aaaagagaaaaggaggcugugg	aaaagagaaaaggaggcugugg	aaaagagaaaaggaggcugugg	aaaagagaaaaggaggcugugg	aaaagagaaaaggaggcugugg	aaaagagaaaaggaggcugugg	aaaagagaaaaggaggcugugg	aaaagagaaaaggaggcugugg	0	14	8	0	11	8	0	0	0	0	1.77283	0.811261	0	1.31648	0.913284	0	0	0
14	novel-cli-miR-121-3p	ugggguuugucgggcucuuuguugcacagguauugaaagagcccuauagagaccaacagagccugacaaacccaaca	ugggguuugucgggcucuuuguugcacagguauugaaagagcccuauagagaccaacagagccugacaaacccaaca	ugggguuugucgggcucuuuguugcacagguauugaaagagcccuauagagaccaacagagccugacaaacccaaca	ugggguuugucgggcucuuuguugcacagguauugaaagagcccuauagagaccaacagagccugacaaacccaaca	ugggguuugucgggcucuuuguugcacagguauugaaagagcccuauagagaccaacagagccugacaaacccaaca	ugggguuugucgggcucuuuguugcacagguauugaaagagcccuauagagaccaacagagccugacaaacccaaca	ugggguuugucgggcucuuuguugcacagguauugaaagagcccuauagagaccaacagagccugacaaacccaaca	ugggguuugucgggcucuuuguugcacagguauugaaagagcccuauagagaccaacagagccugacaaacccaaca	ugggguuugucgggcucuuuguugcacagguauugaaagagcccuauagagaccaacagagccugacaaacccaaca	acagagccugacaaacccaaca	acagagccugacaaacccaaca	acagagccugacaaacccaaca	acagagccugacaaacccaaca	acagagccugacaaacccaaca	acagagccugacaaacccaaca	acagagccugacaaacccaaca	acagagccugacaaacccaaca	acagagccugacaaacccaaca	21	10	0	9	21	20	0	0	0	2.54922	1.26631	0	1.0841	2.51328	2.28321	0	0	0
15	novel-cli-miR-122-3p	ccacucccggcugggucagugagcuggaccaacaaggcucuuaucagcgucccaucuggggugcca	ccacucccggcugggucagugagcuggaccaacaaggcucuuaucagcgucccaucuggggugcca	ccacucccggcugggucagugagcuggaccaacaaggcucuuaucagcgucccaucuggggugcca	ccacucccggcugggucagugagcuggaccaacaaggcucuuaucagcgucccaucuggggugcca	ccacucccggcugggucagugagcuggaccaacaaggcucuuaucagcgucccaucuggggugcca	ccacucccggcugggucagugagcuggaccaacaaggcucuuaucagcgucccaucuggggugcca	ccacucccggcugggucagugagcuggaccaacaaggcucuuaucagcgucccaucuggggugcca	ccacucccggcugggucagugagcuggaccaacaaggcucuuaucagcgucccaucuggggugcca	ccacucccggcugggucagugagcuggaccaacaaggcucuuaucagcgucccaucuggggugcca	ucccaucuggggugcca	ucccaucuggggugcca	gucccaucuggggugcca	ucccaucuggggugcca	ucccaucuggggugcca	ucccaucuggggugcca	ucccaucuggggugcca	ucccaucuggggugcca	ucccaucuggggugcca	0	27	13	0	0	0	0	0	0	0	3.41903	1.3183	0	0	0	0	0	0
16	novel-cli-miR-12-3p	caaggagauggaccuacuucgaaauaacuguaucuuugaaaugggauccaucucuuugaaa	uuucaaaaagguggaccuaauuuaaaaucacuauaucuuugaaacuggauccaucuuuuugaaac	caaaauauggaccuaauuuagcaguauagugaccucaaauuggguccaucuuuuug	caaggagauggaccuacuucgaaauaacuguaucuuugaaaugggauccaucucuuugaaa	caaaaagauggacccaguuucgaagcaguauacauuucagauuggguccaucuuuuug	caaggagauggaccuacuucgaaauaacuguaucuuugaaaugggauccaucucuuugaaa	caaggagauggaccuacuucgaaauaacuguaucuuugaaaugggauccaucucuuugaaa	caaggagauggaccuacuucgaaauaacuguaucuuugaaaugggauccaucucuuugaaa	caaggagauggaccuacuucgaaauaacuguaucuuugaaaugggauccaucucuuugaaa	aaaugggauccaucucuuugaaa	cuggauccaucuuuuugaaac	ucaaauuggguccaucuuuuug	aaaugggauccaucucuuugaaa	ucagauuggguccaucuuuuug	aaaugggauccaucucuuugaaa	aaaugggauccaucucuuugaaa	aaaugggauccaucucuuugaaa	aaaugggauccaucucuuugaaa	0	1	47	0	14	0	0	0	0	0	0.126631	4.76616	0	1.67552	0	0	0	0
17	novel-cli-miR-125-3p	caaaggauggacugaauuucaaagugguuucaauuugaaaucagguccaucuuuuug	aaaagacggacucaauuucagauugcaaugacuuugaaaugggguucaucuuuuug	caaaaagauggacccaguuucgaagcaguauacauuucagauuggguccaucuuuuug	caaaaagauggacccaguuucgaagcaguauacauuucagauuggguccaucuuuuug	caaaaagauggacccaguuucgaagcaguauacauuucagauuggguccaucuuuuug	caaaggauggacugaauuucaaagugguuucaauuugaaaucagguccaucuuuuug	caaaaagauggacccaguuucgaagcaguauacauuucagauuggguccaucuuuuug	caaaaagauggacccaguuucgaagcaguauacauuucagauuggguccaucuuuuug	caaaaagauggacccaguuucgaagcaguauacauuucagauuggguccaucuuuuug	ugaaaucagguccaucuuuuug	ugaaaugggguucaucuuuuug	ucagauuggguccaucuuuuug	ucagauuggguccaucuuuuug	ucagauuggguccaucuuuuug	ugaaaucagguccaucuuuuug	ucagauuggguccaucuuuuug	ucagauuggguccaucuuuuug	ucagauuggguccaucuuuuug	8	0	0	0	14	17	0	0	0	0.971131	0	0	0	1.67552	1.94073	0	0	0
18	novel-cli-miR-125-5p	caaaggauggacugaauuucaaagugguuucaauuugaaaucagguccaucuuuuug	aaaagacggacucaauuucagauugcaaugacuuugaaaugggguucaucuuuuug	caaaaagauggacccaguuucgaagcaguauacauuucagauuggguccaucuuuuug	caaaaagauggacccaguuucgaagcaguauacauuucagauuggguccaucuuuuug	caaaaagauggacccaguuucgaagcaguauacauuucagauuggguccaucuuuuug	caaaggauggacugaauuucaaagugguuucaauuugaaaucagguccaucuuuuug	caaaaagauggacccaguuucgaagcaguauacauuucagauuggguccaucuuuuug	caaaaagauggacccaguuucgaagcaguauacauuucagauuggguccaucuuuuug	caaaaagauggacccaguuucgaagcaguauacauuucagauuggguccaucuuuuug	caaaggauggacugaauuuca	aaaagacggacucaauuucaga	caaaaagauggacccaguuucga	caaaaagauggacccaguuucga	caaaaagauggacccaguuucga	caaaggauggacugaauuuca	caaaaagauggacccaguuucga	caaaaagauggacccaguuucga	caaaaagauggacccaguuucga	8	3	0	0	5	5	0	0	0	0.971131	0.379893	0	0	0.5984	0.570803	0	0	0
19	novel-cli-miR-12-5p	caaggagauggaccuacuucgaaauaacuguaucuuugaaaugggauccaucucuuugaaa	uuucaaaaagguggaccuaauuuaaaaucacuauaucuuugaaacuggauccaucuuuuugaaac	caaaauauggaccuaauuuagcaguauagugaccucaaauuggguccaucuuuuug	caaggagauggaccuacuucgaaauaacuguaucuuugaaaugggauccaucucuuugaaa	caaaaagauggacccaguuucgaagcaguauacauuucagauuggguccaucuuuuug	caaggagauggaccuacuucgaaauaacuguaucuuugaaaugggauccaucucuuugaaa	caaggagauggaccuacuucgaaauaacuguaucuuugaaaugggauccaucucuuugaaa	caaggagauggaccuacuucgaaauaacuguaucuuugaaaugggauccaucucuuugaaa	caaggagauggaccuacuucgaaauaacuguaucuuugaaaugggauccaucucuuugaaa	caaggagauggaccuacuucga	uuucaaaaagguggaccuaauu	caaaauauggaccuaauuuag	caaggagauggaccuacuucga	caaaaagauggacccaguuucga	caaggagauggaccuacuucga	caaggagauggaccuacuucga	caaggagauggaccuacuucga	caaggagauggaccuacuucga	0	5	2	0	5	0	0	0	0	0	0.633155	0.202815	0	0.5984	0	0	0	0
20	novel-cli-miR-130-5p	uacggaauaugcucggcugcagucuguguuguauucugugcugcagcccguucuguuccguuuu	uacggaauaugcucggcugcagucuguguuguauucugugcugcagcccguucuguuccguuuu	uacggaauaugcucggcugcagucuguguuguauucugugcugcagcccguucuguuccguuuu	uacggaauaugcucggcugcagucuguguuguauucugugcugcagcccguucuguuccguuuu	uacggaauaugcucggcugcagucuguguuguauucugugcugcagcccguucuguuccguuuu	uacggaauaugcucggcugcagucuguguuguauucugugcugcagcccguucuguuccguuuu	uacggaauaugcucggcugcagucuguguuguauucugugcugcagcccguucuguuccguuuu	uacggaauaugcucggcugcagucuguguuguauucugugcugcagcccguucuguuccguuuu	uacggaauaugcucggcugcagucuguguuguauucugugcugcagcccguucuguuccguuuu	uacggaauaugcucggcugcagu	uacggaauaugcucggcugcagu	uacggaauaugcucggcugcagu	uacggaauaugcucggcugcag	uacggaauaugcucggcugcagu	uacggaauaugcucggcugcagu	uacggaauaugcucggcugcagu	uacggaauaugcucggcugcagu	uacggaauaugcucggcugcagu	9	0	11	17	0	0	0	0	0	1.09252	0	1.11548	2.04774	0	0	0	0	0
21	novel-cli-miR-132-3p	ucucauggaaauuaguucuuaagauaacauucauugcuuuaaggacuaucuccguggguaau	ucucauggaaauuaguucuuaagauaacauucauugcuuuaaggacuaucuccguggguaau	ucucauggaaauuaguucuuaagauaacauucauugcuuuaaggacuaucuccguggguaau	ucucauggaaauuaguucuuaagauaacauucauugcuuuaaggacuaucuccguggguaau	ucucauggaaauuaguucuuaagauaacauucauugcuuuaaggacuaucuccguggguaau	agagaacugaauaccauggacugaacacauggaacuggaaccaguccauggaauucaguucucaga	ucucauggaaauuaguucuuaagauaacauucauugcuuuaaggacuaucuccguggguaau	ucucauggaaauuaguucuuaagauaacauucauugcuuuaaggacuaucuccguggguaau	ucucauggaaauuaguucuuaagauaacauucauugcuuuaaggacuaucuccguggguaau	uaaggacuaucuccguggguaau	uaaggacuaucuccguggguaau	uaaggacuaucuccguggguaau	uaaggacuaucuccguggguaau	uaaggacuaucuccguggguaau	uccauggaauucaguucucaga	uaaggacuaucuccguggguaau	uaaggacuaucuccguggguaau	uaaggacuaucuccguggguaau	3	0	0	0	0	0	0	0	0	0.364174	0	0	0	0	0	0	0	0
22	novel-cli-miR-132-5p	ucucauggaaauuaguucuuaagauaacauucauugcuuuaaggacuaucuccguggguaau	ucucauggaaauuaguucuuaagauaacauucauugcuuuaaggacuaucuccguggguaau	ucucauggaaauuaguucuuaagauaacauucauugcuuuaaggacuaucuccguggguaau	ucucauggaaauuaguucuuaagauaacauucauugcuuuaaggacuaucuccguggguaau	ucucauggaaauuaguucuuaagauaacauucauugcuuuaaggacuaucuccguggguaau	agagaacugaauaccauggacugaacacauggaacuggaaccaguccauggaauucaguucucaga	ucucauggaaauuaguucuuaagauaacauucauugcuuuaaggacuaucuccguggguaau	ucucauggaaauuaguucuuaagauaacauucauugcuuuaaggacuaucuccguggguaau	ucucauggaaauuaguucuuaagauaacauucauugcuuuaaggacuaucuccguggguaau	ucucauggaaauuaguucuu	ucucauggaaauuaguucuu	ucucauggaaauuaguucuu	ucucauggaaauuaguucuu	ucucauggaaauuaguucuu	agagaacugaauaccauggacu	ucucauggaaauuaguucuu	ucucauggaaauuaguucuu	ucucauggaaauuaguucuu	1	0	0	0	0	1503	0	0	0	0.121391	0	0	0	0	171.583	0	0	0
23	novel-cli-miR-137-3p	uccucagcugguguaagucggcuuuuacuccauuaauacugacuuacauugccugaggacc	uccucagcugguguaagucggcuuuuacuccauuaauacugacuuacauugccugaggacc	auccucagcugguguaagucggcuuuuacuccauuaauacugacuuacauugccugaggacc	auccucagcugguguaagucggcuuuuacuccauuaauacugacuuacauugccugaggacc	uccucagcugguguaagucggcuuuuacuccauuaauacugacuuacauugccugaggacc	uccucagcugguguaagucggcuuuuacuccauuaauacugacuuacauugccugaggacc	uccucagcugguguaagucggcuuuuacuccauuaauacugacuuacauugccugaggacc	uccucagcugguguaagucggcuuuuacuccauuaauacugacuuacauugccugaggacc	uccucagcugguguaagucggcuuuuacuccauuaauacugacuuacauugccugaggacc	ugacuuacauugccugaggacc	ugacuuacauugccugaggacc	ugacuuacauugccugaggacc	ugacuuacauugccugaggacc	ugacuuacauugccugaggacc	ugacuuacauugccugaggacc	ugacuuacauugccugaggacc	ugacuuacauugccugaggacc	ugacuuacauugccugaggacc	0	6	10	24	43	42	0	183	0	0	0.759785	1.01408	2.89093	5.14624	4.79474	0	20.4901	0
24	novel-cli-miR-137-5p	uccucagcugguguaagucggcuuuuacuccauuaauacugacuuacauugccugaggacc	uccucagcugguguaagucggcuuuuacuccauuaauacugacuuacauugccugaggacc	auccucagcugguguaagucggcuuuuacuccauuaauacugacuuacauugccugaggacc	auccucagcugguguaagucggcuuuuacuccauuaauacugacuuacauugccugaggacc	uccucagcugguguaagucggcuuuuacuccauuaauacugacuuacauugccugaggacc	uccucagcugguguaagucggcuuuuacuccauuaauacugacuuacauugccugaggacc	uccucagcugguguaagucggcuuuuacuccauuaauacugacuuacauugccugaggacc	uccucagcugguguaagucggcuuuuacuccauuaauacugacuuacauugccugaggacc	uccucagcugguguaagucggcuuuuacuccauuaauacugacuuacauugccugaggacc	uccucagcugguguaagucggc	uccucagcugguguaagucggc	auccucagcugguguaagucgg	auccucagcugguguaagucggc	uccucagcugguguaagucggc	uccucagcugguguaagucggc	uccucagcugguguaagucggc	uccucagcugguguaagucggc	uccucagcugguguaagucggc	0	3	1	4	7	4	0	27	0	0	0.379893	0.101408	0.481822	0.83776	0.456642	0	3.02314	0
25	novel-cli-miR-139-3p	uguagccgguggguuuuguugcauuugugaaugugcacaaguccucacuugcuacgcu	uguagccgguggguuuuguugcauuugugaaugugcacaaguccucacuugcuacgcu	uguagccgguggguuuuguugcauuugugaaugugcacaaguccucacuugcuacgcu	uguagccgguggguuuuguugcauuugugaaugugcacaaguccucacuugcuacgcu	uguagccgguggguuuuguugcauuugugaaugugcacaaguccucacuugcuacgcu	uguagccgguggguuuuguugcauuugugaaugugcacaaguccucacuugcuacgcu	uguagccgguggguuuuguugcauuugugaaugugcacaaguccucacuugcuacgcu	uagaaaguuagagguuguagauuuucuuuuuuuuuuuuccuacaaccucuaacuuucuacu	uguagccgguggguuuuguugcauuugugaaugugcacaaguccucacuugcuacgcu	cacaaguccucacuugcuacgcu	cacaaguccucacuugcuacgcu	cacaaguccucacuugcuacgcu	cacaaguccucacuugcuacgcu	cacaaguccucacuugcuacgcu	cacaaguccucacuugcuacgcu	cacaaguccucacuugcuacgcu	cuacaaccucuaacuuucuacu	cacaaguccucacuugcuacgcu	0	0	1	0	0	0	1	0	0	0	0	0.101408	0	0	0	0.105583	0	0
26	novel-cli-miR-139-5p	uguagccgguggguuuuguugcauuugugaaugugcacaaguccucacuugcuacgcu	uguagccgguggguuuuguugcauuugugaaugugcacaaguccucacuugcuacgcu	uguagccgguggguuuuguugcauuugugaaugugcacaaguccucacuugcuacgcu	uguagccgguggguuuuguugcauuugugaaugugcacaaguccucacuugcuacgcu	uguagccgguggguuuuguugcauuugugaaugugcacaaguccucacuugcuacgcu	uguagccgguggguuuuguugcauuugugaaugugcacaaguccucacuugcuacgcu	uguagccgguggguuuuguugcauuugugaaugugcacaaguccucacuugcuacgcu	uagaaaguuagagguuguagauuuucuuuuuuuuuuuuccuacaaccucuaacuuucuacu	uguagccgguggguuuuguugcauuugugaaugugcacaaguccucacuugcuacgcu	uguagccgguggguuuuguugc	uguagccgguggguuuuguugc	uguagccgguggguuuuguugca	uguagccgguggguuuuguugc	uguagccgguggguuuuguugc	uguagccgguggguuuuguugc	uguagccgguggguuuuguugc	uagaaaguuagagguuguagau	uguagccgguggguuuuguugc	0	0	2	0	0	0	2	3	0	0	0	0.202815	0	0	0	0.211166	0.335904	0
27	novel-cli-miR-140-5p	aagguuucagaggguucagcaccgcggugaaaugcagggcugggccaccugggacucau	aagguuucagaggguucagcaccgcggugaaaugcagggcugggccaccugggacucauuc	aagguuucagaggguucagcaccgcggugaaaugcagggcugggccaccugggacucau	aagguuucagaggguucagcaccgcggugaaaugcagggcugggccaccugggacucau	aagguuucagaggguucagcaccgcggugaaaugcagggcugggccaccugggacucauuc	aagguuucagaggguucagcaccgcggugaaaugcagggcugggccaccugggacucau	aagguuucagaggguucagcaccgcggugaaaugcagggcugggccaccugggacucau	aagguuucagaggguucagcaccgcggugaaaugcagggcugggccaccugggacucau	aagguuucagaggguucagcaccgcggugaaaugcagggcugggccaccugggacucau	aagguuucagaggguucagcacc	aagguuucagaggguucagcacc	aagguuucagaggguucagcac	aagguuucagaggguucagcac	aagguuucagaggguucagcacc	aagguuucagaggguucagcac	aagguuucagaggguucagcac	aagguuucagaggguucagcac	aagguuucagaggguucagcacc	6	9	0	0	12	3	0	0	13	0.728348	1.13968	0	0	1.43616	0.342482	0	0	1.17142
28	novel-cli-miR-14-3p	caagaagaugggcccaauuugaauucacuguaucuuugaaacugggucccucuuuuuga	caagaagaugggcccaauuugaauucacuguaucuuugaaacugggucccucuuuuuga	caagaagaugggcccaauuugaauucacuguaucuuugaaacugggucccucuuuuuga	caagaagaugggcccaauuugaauucacuguaucuuugaaacugggucccucuuuuuga	caaaaagauggacccaguuucgaagcaguauacauuucagauuggguccaucuuuuug	gaagagauggacccaauuucaaaguaauuucaauuugaaaucagguccaucuuuuug	caagaagaugggcccaauuugaauucacuguaucuuugaaacugggucccucuuuuuga	caagaagaugggcccaauuugaauucacuguaucuuugaaacugggucccucuuuuuga	caagaagaugggcccaauuugaauucacuguaucuuugaaacugggucccucuuuuuga	aaacugggucccucuuuuuga	aaacugggucccucuuuuuga	aaacugggucccucuuuuuga	aaacugggucccucuuuuuga	ucagauuggguccaucuuuuug	ugaaaucagguccaucuuuuug	aaacugggucccucuuuuuga	aaacugggucccucuuuuuga	aaacugggucccucuuuuuga	0	0	0	0	14	17	0	0	0	0	0	0	0	1.67552	1.94073	0	0	0
29	novel-cli-miR-144-3p	uggcagcuucagaagacaauugagaccuucagaaagccaauuugucucuuggaacugccgcu	uggcagcuucagaagacaauugagaccuucagaaagccaauuugucucuuggaacugccgcu	uggcagcuucagaagacaauugagaccuucagaaagccaauuugucucuuggaacugccgcu	uggcagcuucagaagacaauugagaccuucagaaagccaauuugucucuuggaacugccgcu	uggcagcuucagaagacaauugagaccuucagaaagccaauuugucucuuggaacugccgcu	uggcagcuucagaagacaauugagaccuucagaaagccaauuugucucuuggaacugccgcu	uggcagcuucagaagacaauugagaccuucagaaagccaauuugucucuuggaacugccgcu	uggcagcuucagaagacaauugagaccuucagaaagccaauuugucucuuggaacugccgcu	uggcagcuucagaagacaauugagaccuucagaaagccaauuugucucuuggaacugccgcu	auuugucucuuggaacugccgcu	auuugucucuuggaacugccgcu	auuugucucuuggaacugccgcu	auuugucucuuggaacugccgcu	auuugucucuuggaacugccgcu	auuugucucuuggaacugccgcu	auuugucucuuggaacugccgcu	auuugucucuuggaacugccgcu	auuugucucuuggaacugccgcu	0	0	0	37	0	64	27	0	42	0	0	0	4.45685	0	7.30627	2.85074	0	3.78457
30	novel-cli-miR-145-3p	uggggcgcacaggagugguuugcugcuggcagugggcugccucccugugcgcagucuug	uggggcgcacaggagugguuugcugcuggcagugggcugccucccugugcgcagucuug	uggggcgcacaggagugguuugcugcuggcagugggcugccucccugugcgcagucuug	uggggcgcacaggagugguuugcugcuggcagugggcugccucccugugcgcagucuug	uggggcgcacaggagugguuugcugcuggcagugggcugccucccugugcgcagucuug	uggggcgcacaggagugguuugcugcuggcagugggcugccucccugugcgcagucuug	uggggcgcacaggagugguuugcugcuggcagugggcugccucccugugcgcagucuug	uggggcgcacaggagugguuugcugcuggcagugggcugccucccugugcgcagucuug	uggggcgcacaggagugguuugcugcuggcagugggcugccucccugugcgcagucuug	cucccugugcgcagucuug	cucccugugcgcagucuug	cucccugugcgcagucuug	cucccugugcgcagucuug	cucccugugcgcagucuug	cucccugugcgcagucuug	cucccugugcgcagucuug	cucccugugcgcagucuug	cucccugugcgcagucuug	20	0	0	0	0	0	0	0	0	2.42783	0	0	0	0	0	0	0	0
31	novel-cli-miR-14-5p	caagaagaugggcccaauuugaauucacuguaucuuugaaacugggucccucuuuuuga	caagaagaugggcccaauuugaauucacuguaucuuugaaacugggucccucuuuuuga	caagaagaugggcccaauuugaauucacuguaucuuugaaacugggucccucuuuuuga	caagaagaugggcccaauuugaauucacuguaucuuugaaacugggucccucuuuuuga	caaaaagauggacccaguuucgaagcaguauacauuucagauuggguccaucuuuuug	gaagagauggacccaauuucaaaguaauuucaauuugaaaucagguccaucuuuuug	caagaagaugggcccaauuugaauucacuguaucuuugaaacugggucccucuuuuuga	caagaagaugggcccaauuugaauucacuguaucuuugaaacugggucccucuuuuuga	caagaagaugggcccaauuugaauucacuguaucuuugaaacugggucccucuuuuuga	caagaagaugggcccaauuuga	caagaagaugggcccaauuuga	caagaagaugggcccaauuuga	caagaagaugggcccaauuuga	caaaaagauggacccaguuucga	gaagagauggacccaauuuca	caagaagaugggcccaauuuga	caagaagaugggcccaauuuga	caagaagaugggcccaauuuga	0	0	0	0	5	3	0	0	0	0	0	0	0	0.5984	0.342482	0	0	0
32	novel-cli-miR-146-3p	guaguaguaguaguaguaguaguaguaguaguaguaguaguaguaguaguaguaguaguaguaguaguaguaguaguaguaguac	guaguaguaguaguaguaguaguaguaguaguaguaguaguaguaguaguaguaguaguaguaguaguaguaguaguaguaguac	guaguaguaguaguaguaguaguaguaguaguaguaguaguaguaguaguaguaguaguaguaguaguaguaguaguaguaguac	guaguaguaguaguaguaguaguaguaguaguaguaguaguaguaguaguaguaguaguaguaguaguaguaguaguaguaguac	guaguaguaguaguaguaguaguaguaguaguaguaguaguaguaguaguaguaguaguaguaguaguaguaguaguaguaguac	guaguaguaguaguaguaguaguaguaguaguaguaguaguaguaguaguaguaguaguaguaguaguaguaguaguaguaguac	guaguaguaguaguaguaguaguaguaguaguaguaguaguaguaguaguaguaguaguaguaguaguaguaguaguaguaguac	guaguaguaguaguaguaguaguaguaguaguaguaguaguaguaguaguaguaguaguaguaguaguaguaguaguaguaguac	guaguaguaguaguaguaguaguaguaguaguaguaguaguaguaguaguaguaguaguaguaguaguaguaguaguaguaguac	guaguaguaguaguaguaguac	guaguaguaguaguaguaguac	guaguaguaguaguaguaguac	guaguaguaguaguaguaguac	guaguaguaguaguaguaguac	guaguaguaguaguaguaguac	guaguaguaguaguaguaguac	guaguaguaguaguaguaguac	guaguaguaguaguaguaguac	0	0	0	0	0	0	4	0	0	0	0	0	0	0	0	0.422331	0	0
33	novel-cli-miR-148-3p	uggccgcagcagcauggagcagguuaaauuguuccuguuccggucgcugugaccaga	uggccgcagcagcauggagcagguuaaauuguuccuguuccggucgcugugaccaga	uggccgcagcagcauggagcagguuaaauuguuccuguuccggucgcugugaccaga	uggccgcagcagcauggagcagguuaaauuguuccuguuccggucgcugugaccaga	uggccgcagcagcauggagcagguuaaauuguuccuguuccggucgcugugaccaga	uggccgcagcagcauggagcagguuaaauuguuccuguuccggucgcugugaccaga	uggccgcagcagcauggagcagguuaaauuguuccuguuccggucgcugugaccaga	uggccgcagcagcauggagcagguuaaauuguuccuguuccggucgcugugaccaga	uggccgcagcagcauggagcagguuaaauuguuccuguuccggucgcugugaccaga	uguuccggucgcugugaccaga	uguuccggucgcugugaccaga	uguuccggucgcugugaccaga	uguuccggucgcugugaccaga	uguuccggucgcugugaccaga	uguuccggucgcugugaccaga	uguuccggucgcugugaccaga	uguuccggucgcugugaccaga	uguuccggucgcugugaccaga	0	0	0	0	10	0	0	0	0	0	0	0	0	1.1968	0	0	0	0
34	novel-cli-miR-149-3p	ucgguugcucagggcuuuauccagucacauauugaaaaccugcaaggauggagaacugcucugggcaaccugcu	ucgguugcucagggcuuuauccagucacauauugaaaaccugcaaggauggagaacugcucugggcaaccugcu	ucgguugcucagggcuuuauccagucacauauugaaaaccugcaaggauggagaacugcucugggcaaccugcu	ucgguugcucagggcuuuauccagucacauauugaaaaccugcaaggauggagaacugcucugggcaaccugcu	ucgguugcucagggcuuuauccagucacauauugaaaaccugcaaggauggagaacugcucugggcaaccugcu	ucgguugcucagggcuuuauccagucacauauugaaaaccugcaaggauggagaacugcucugggcaaccugcu	ucgguugcucagggcuuuauccagucacauauugaaaaccugcaaggauggagaacugcucugggcaaccugcu	ucgguugcucagggcuuuauccagucacauauugaaaaccugcaaggauggagaacugcucugggcaaccugcu	aagcugcugcaguggugccaauggcucagagaaugugcaugcagcacugagcagcuacu	aacugcucugggcaaccugcu	aacugcucugggcaaccugcu	aacugcucugggcaaccugcu	aacugcucugggcaaccugcu	aacugcucugggcaaccugcu	aacugcucugggcaaccugcu	aacugcucugggcaaccugcu	aacugcucugggcaaccugcu	caugcagcacugagcagcuacu	0	0	0	0	0	0	0	0	2	0	0	0	0	0	0	0	0	0.180218
35	novel-cli-miR-151-5p	ugugagauguggaucagcagcuucugcuuuugcugcugguccacaucucacaca	ugugagauguggaucagcagcuucugcuuuugcugcugguccacaucucacaca	ugugagauguggaucagcagcuucugcuuuugcugcugguccacaucucacaca	ugugagauguggaucagcagcuucugcuuuugcugcugguccacaucucacaca	ugugagauguggaucagcagcuucugcuuuugcugcugguccacaucucacaca	ugugagauguggaucagcagcuucugcuuuugcugcugguccacaucucacaca	ugugagauguggaucagcagcuucugcuuuugcugcugguccacaucucacaca	ugugagauguggaucagcagcuucugcuuuugcugcugguccacaucucacaca	ugugagauguggaucagcagcuucugcuuuugcugcugguccacaucucacaca	ugugagauguggaucagcagcu	ugugagauguggaucagcagcu	ugugagauguggaucagcagcu	ugugagauguggaucagcagcu	ugugagauguggaucagcagcu	ugugagauguggaucagcagcu	ugugagauguggaucagcagcu	ugugagauguggaucagcagcu	ugugagauguggaucagcagcu	0	0	0	0	0	0	13	12	0	0	0	0	0	0	0	1.37258	1.34362	0
36	novel-cli-miR-155-3p	gugauuauucagugauguguuuuugcaaauccacgaacacaucauugaauaauuaucagg	ugauuauucagugauguguuuuugcaaauccacgaacacaucauugaauaauuaucagg	ugauuauucagugauguguuuuugcaaauccacgaacacaucauugaauaauuaucag	ugauuauucagugauguguuuuugcaaauccacgaacacaucauugaauaauuau	gugauuauucagugauguguuuuugcaaauccacgaacacaucauugaauaauuaucagga	ugauuauucagugauguguuuuugcaaauccacgaacacaucauugaauaauua	ugauuauucagugauguguuuuugcaaauccacgaacacaucauugaauaauuauc	ugauuauucagugauguguuuuugcaaauccacgaacacaucauugaauaauuauc	ugauuauucagugauguguuuuugcaaauccacgaacacaucauugaauaauuaucagg	acaucauugaauaauuaucagg	acaucauugaauaauuaucagg	cacaucauugaauaauuaucag	aacacaucauugaauaauuau	acaucauugaauaauuaucagga	aacacaucauugaauaauua	acacaucauugaauaauuauc	aacacaucauugaauaauuauc	acaucauugaauaauuaucagg	5	6	6	4	3	2	2	4	5	0.606957	0.759785	0.608446	0.481822	0.35904	0.228321	0.211166	0.447872	0.450545
37	novel-cli-miR-155-5p	gugauuauucagugauguguuuuugcaaauccacgaacacaucauugaauaauuaucagg	ugauuauucagugauguguuuuugcaaauccacgaacacaucauugaauaauuaucagg	ugauuauucagugauguguuuuugcaaauccacgaacacaucauugaauaauuaucag	ugauuauucagugauguguuuuugcaaauccacgaacacaucauugaauaauuau	gugauuauucagugauguguuuuugcaaauccacgaacacaucauugaauaauuaucagga	ugauuauucagugauguguuuuugcaaauccacgaacacaucauugaauaauua	ugauuauucagugauguguuuuugcaaauccacgaacacaucauugaauaauuauc	ugauuauucagugauguguuuuugcaaauccacgaacacaucauugaauaauuauc	ugauuauucagugauguguuuuugcaaauccacgaacacaucauugaauaauuaucagg	gugauuauucagugauguguuu	ugauuauucagugauguguuuu	ugauuauucagugauguguuuu	ugauuauucagugauguguuuu	gugauuauucagugauguguu	ugauuauucagugauguguuuu	ugauuauucagugauguguuuu	ugauuauucagugauguguuuu	ugauuauucagugauguguuuu	21	13	9	15	9	25	12	14	12	2.54922	1.6462	0.912668	1.80683	1.07712	2.85401	1.26699	1.56755	1.08131
38	novel-cli-miR-156-3p	uaagaugcaaacugucugaacguuucuauaaacguucaaauaguuugcauccgaug	uaagaugcaaacugucugaacguuucuauaaacguucaaauaguuugcauccgaug	uaagaugcaaacugucugaacguuucuauaaacguucaaauaguuugcauccgaug	uaagaugcaaacugucugaacguuucuauaaacguucaaauaguuugcauccgaug	uaagaugcaaacugucugaacguuucuauaaacguucaaauaguuugcauccgaug	uaagaugcaaacugucugaacguuucuauaaacguucaaauaguuugcauccgaug	uaagaugcaaacugucugaacguuucuauaaacguucaaauaguuugcauccgaug	uaagaugcaaacugucugaacguuucuauaaacguucaaauaguuugcauccgaug	uaagaugcaaacugucugaacguuucuauaaacguucaaauaguuugcauccgaug	uucaaauaguuugcauccgaug	uucaaauaguuugcauccgaug	uucaaauaguuugcauccgaug	ucaaauaguuugcauccgaug	uucaaauaguuugcauccgaug	uucaaauaguuugcauccgaug	uucaaauaguuugcauccgaug	uucaaauaguuugcauccgaug	uucaaauaguuugcauccgaug	1	0	0	0	0	0	0	0	0	0.121391	0	0	0	0	0	0	0	0
39	novel-cli-miR-156-5p	uaagaugcaaacugucugaacguuucuauaaacguucaaauaguuugcauccgaug	uaagaugcaaacugucugaacguuucuauaaacguucaaauaguuugcauccgaug	uaagaugcaaacugucugaacguuucuauaaacguucaaauaguuugcauccgaug	uaagaugcaaacugucugaacguuucuauaaacguucaaauaguuugcauccgaug	uaagaugcaaacugucugaacguuucuauaaacguucaaauaguuugcauccgaug	uaagaugcaaacugucugaacguuucuauaaacguucaaauaguuugcauccgaug	uaagaugcaaacugucugaacguuucuauaaacguucaaauaguuugcauccgaug	uaagaugcaaacugucugaacguuucuauaaacguucaaauaguuugcauccgaug	uaagaugcaaacugucugaacguuucuauaaacguucaaauaguuugcauccgaug	uaagaugcaaacugucugaac	uaagaugcaaacugucugaac	uaagaugcaaacugucugaac	uaagaugcaaacugucugaac	uaagaugcaaacugucugaac	uaagaugcaaacugucugaac	uaagaugcaaacugucugaac	uaagaugcaaacugucugaac	uaagaugcaaacugucugaac	9	0	0	9	0	0	0	0	0	1.09252	0	0	1.0841	0	0	0	0	0
40	novel-cli-miR-158-3p	ucuuuagcuggaagggucccuggagcaagagaagaaacuacgcauggaccuugagagagcuaagagg	ucuuuagcuggaagggucccuggagcaagagaagaaacuacgcauggaccuugagagagcuaagagg	ucuuuagcuggaagggucccuggagcaagagaagaaacuacgcauggaccuugagagagcuaagagg	ucuuuagcuggaagggucccuggagcaagagaagaaacuacgcauggaccuugagagagcuaagagg	ucuuuagcuggaagggucccuggagcaagagaagaaacuacgcauggaccuugagagagcuaagagg	ucuuuagcuggaagggucccuggagcaagagaagaaacuacgcauggaccuugagagagcuaagagg	ucuuuagcuggaagggucccuggagcaagagaagaaacuacgcauggaccuugagagagcuaagagg	ucuuuagcuggaagggucccuggagcaagagaagaaacuacgcauggaccuugagagagcuaagagg	ucuuuagcuggaagggucccuggagcaagagaagaaacuacgcauggaccuugagagagcuaagagg	cauggaccuugagagagcuaagagg	cauggaccuugagagagcuaagagg	cauggaccuugagagagcuaagagg	cauggaccuugagagagcuaagagg	cauggaccuugagagagcuaagagg	cauggaccuugagagagcuaagagg	cauggaccuugagagagcuaagagg	cauggaccuugagagagcuaagagg	cauggaccuugagagagcuaagagg	0	0	0	0	0	27	0	0	0	0	0	0	0	0	3.08233	0	0	0
41	novel-cli-miR-159-5p	ucagccugcaggccacgcuuccuggcugcaucaaaagacgcguggccagcagguggag	ucagccugcaggccacgcuuccuggcugcaucaaaagacgcguggccagcagguggagg	ucagccugcaggccacgcuuccuggcugcaucaaaagacgcguggccagcagguggagg	ucagccugcaggccacgcuuccuggcugcaucaaaagacgcguggccagcagguggag	ucagccugcaggccacgcuuccuggcugcaucaaaagacgcguggccagcagguggag	ucagccugcaggccacgcuuccuggcugcaucaaaagacgcguggccagcagguggag	ucagccugcaggccacgcuuccuggcugcaucaaaagacgcguggccagcagguggag	ucagccugcaggccacgcuuccuggcugcaucaaaagacgcguggccagcagguggag	ucagccugcaggccacgcuuccuggcugcaucaaaagacgcguggccagcagguggag	ucagccugcaggccacgcuuccu	ucagccugcaggccacgcuuccu	ucagccugcaggccacgcuuccu	ucagccugcaggccacgcuuccu	ucagccugcaggccacgcuuccu	ucagccugcaggccacgcuuccu	ucagccugcaggccacgcuuccu	ucagccugcaggccacgcuuccu	ucagccugcaggccacgcuuccu	0	9	15	0	0	0	0	0	0	0	1.13968	1.52111	0	0	0	0	0	0
42	novel-cli-miR-17-3p	aguuuccacucuguguucuuguguacuuacaggaggagcacaguuuggagacugg	aguuuccacucuguguucuuguguacuuacaggaggagcacaguuuggagacugg	aguuuccacucuguguucuuguguacuuacaggaggagcacaguuuggagacug	aguuuccacucuguguucuuguguacuuacaggaggagcacaguuuggagacugg	aguuuccacucuguguucuuguguacuuacaggaggagcacaguuuggagacugg	aguuuccacucuguguucuuguguacuuacaggaggagcacaguuuggagacugg	aguuuccacucuguguucuuguguacuuacaggaggagcacaguuuggagacugg	aguuuccacucuguguucuuguguacuuacaggaggagcacaguuuggagacugg	aguuuccacucuguguucuuguguacuuacaggaggagcacaguuuggagacugg	aggagcacaguuuggagacugg	aggagcacaguuuggagacugg	aggagcacaguuuggagacug	aggagcacaguuuggagacugg	aggagcacaguuuggagacugg	aggagcacaguuuggagacugg	aggagcacaguuuggagacugg	aggagcacaguuuggagacugg	aggagcacaguuuggagacugg	0	0	1	0	3	0	0	0	0	0	0	0.101408	0	0.35904	0	0	0	0
43	novel-cli-miR-17-5p	aguuuccacucuguguucuuguguacuuacaggaggagcacaguuuggagacugg	aguuuccacucuguguucuuguguacuuacaggaggagcacaguuuggagacugg	aguuuccacucuguguucuuguguacuuacaggaggagcacaguuuggagacug	aguuuccacucuguguucuuguguacuuacaggaggagcacaguuuggagacugg	aguuuccacucuguguucuuguguacuuacaggaggagcacaguuuggagacugg	aguuuccacucuguguucuuguguacuuacaggaggagcacaguuuggagacugg	aguuuccacucuguguucuuguguacuuacaggaggagcacaguuuggagacugg	aguuuccacucuguguucuuguguacuuacaggaggagcacaguuuggagacugg	aguuuccacucuguguucuuguguacuuacaggaggagcacaguuuggagacugg	aguuuccacucuguguucuugu	aguuuccacucuguguucuugu	aguuuccacucuguguucuugu	aguuuccacucuguguucuugu	aguuuccacucuguguucuugu	aguuuccacucuguguucuugu	aguuuccacucuguguucuugu	aguuuccacucuguguucuugu	aguuuccacucuguguucuugu	0	0	3	0	4	0	0	0	0	0	0	0.304223	0	0.47872	0	0	0	0
44	novel-cli-miR-18-3p	auccagacuggucuuggucucuuugcuggugcaguccugcucugagaagggccgguuuggagacaguc	auccagacuggucuuggucucuuugcuggugcaguccugcucugagaagggccgguuuggagacaguc	auccagacuggucuuggucucuuugcuggugcaguccugcucugagaagggccgguuuggagacaguc	auccagacuggucuuggucucuuugcuggugcaguccugcucugagaagggccgguuuggagacaguc	ggagcagcuccaguuguuccaaaguuguuccugagucuggaacagcuggaucuggucauc	auccagacuggucuuggucucuuugcuggugcaguccugcucugagaagggccgguuuggagacaguc	auccagacuggucuuggucucuuugcuggugcaguccugcucugagaagggccgguuuggagacaguc	auccagacuggucuuggucucuuugcuggugcaguccugcucugagaagggccgguuuggagacaguc	auccagacuggucuuggucucuuugcuggugcaguccugcucugagaagggccgguuuggagacaguc	agaagggccgguuuggagacaguc	agaagggccgguuuggagacaguc	agaagggccgguuuggagacaguc	agaagggccgguuuggagacaguc	aacagcuggaucuggucauc	gagaagggccgguuuggagacaguc	agaagggccgguuuggagacaguc	agaagggccgguuuggagacaguc	agaagggccgguuuggagacaguc	0	0	0	0	3	86	0	0	0	0	0	0	0	0.35904	9.8178	0	0	0
45	novel-cli-miR-18-5p	auccagacuggucuuggucucuuugcuggugcaguccugcucugagaagggccgguuuggagacaguc	auccagacuggucuuggucucuuugcuggugcaguccugcucugagaagggccgguuuggagacaguc	auccagacuggucuuggucucuuugcuggugcaguccugcucugagaagggccgguuuggagacaguc	auccagacuggucuuggucucuuugcuggugcaguccugcucugagaagggccgguuuggagacaguc	ggagcagcuccaguuguuccaaaguuguuccugagucuggaacagcuggaucuggucauc	auccagacuggucuuggucucuuugcuggugcaguccugcucugagaagggccgguuuggagacaguc	auccagacuggucuuggucucuuugcuggugcaguccugcucugagaagggccgguuuggagacaguc	auccagacuggucuuggucucuuugcuggugcaguccugcucugagaagggccgguuuggagacaguc	auccagacuggucuuggucucuuugcuggugcaguccugcucugagaagggccgguuuggagacaguc	auccagacuggucuuggucucu	auccagacuggucuuggucucu	auccagacuggucuuggucucu	auccagacuggucuuggucucu	ggagcagcuccaguuguucc	auccagacuggucuuggucucuuugcu	auccagacuggucuuggucucu	auccagacuggucuuggucucu	auccagacuggucuuggucucu	0	0	0	0	0	6	0	0	0	0	0	0	0	0	0.684963	0	0	0
46	novel-cli-miR-21-3p	cugaaacauucuaggucucaaaagaaauucagcuuucgagaccuagaauguuucagu	cugaaacauucuaggucucaaaagaaauucagcuuucgagaccuagaauguuucagu	cugaaacauucuaggucucaaaagaaauucagcuuucgagaccuagaauguuucagu	cugaaacauucuaggucucaaaagaaauucagcuuucgagaccuagaauguuucagu	cugaaacauucuaggucucaaaagaaauucagcuuucgagaccuagaauguuucagu	cugaaacauucuaggucucaaaagaaauucagcuuucgagaccuagaauguuucagu	cugaaacauucuaggucucaaaagaaauucagcuuucgagaccuagaauguuucagu	cugaaacauucuaggucucaaaagaaauucagcuuucgagaccuagaauguuucagu	cugaaacauucuaggucucaaaagaaauucagcuuucgagaccuagaauguuucagu	ucgagaccuagaauguuucagu	ucgagaccuagaauguuucagu	ucgagaccuagaauguuucagu	ucgagaccuagaauguuucagu	ucgagaccuagaauguuucagu	ucgagaccuagaauguuucagu	ucgagaccuagaauguuucagu	ucgagaccuagaauguuucagu	ucgagaccuagaauguuucagu	0	0	0	0	0	0	0	3	0	0	0	0	0	0	0	0	0.335904	0
47	novel-cli-miR-25-5p	caguaguauuuaggaguaacugcucacaauacagaaggaccggacuccacaaguuauaguauggugagccauugcuuuagaauacugccuggu	caguaguauuuaggaguaacugcucacaauacagaaggaccggacuccacaaguuauaguauggugagccauugcuuuagaauacugccuggu	caguaguauuuaggaguaacugcucacaauacagaaggaccggacuccacaaguuauaguauggugagccauugcuuuagaauacugccuggu	caguaguauuuaggaguaacugcucacaauacagaaggaccggacuccacaaguuauaguauggugagccauugcuuuagaauacugccuggu	caguaguauuuaggaguaacugcucacaauacagaaggaccggacuccacaaguuauaguauggugagccauugcuuuagaauacugccuggu	caguaguauuuaggaguaacugcucacaauacagaaggaccggacuccacaaguuauaguauggugagccauugcuuuagaauacugccuggu	caguaguauuuaggaguaacugcucacaauacagaaggaccggacuccacaaguuauaguauggugagccauugcuuuagaauacugccuggu	caguaguauuuaggaguaacugcucacaauacagaaggaccggacuccacaaguuauaguauggugagccauugcuuuagaauacugccuggu	caguaguauuuaggaguaacugcucacaauacagaaggaccggacuccacaaguuauaguauggugagccauugcuuuagaauacugccuggu	caguaguauuuaggaguaacugcu	caguaguauuuaggaguaacugcu	caguaguauuuaggaguaacugcu	caguaguauuuaggaguaacugcu	caguaguauuuaggaguaacugcu	caguaguauuuaggaguaacugcu	caguaguauuuaggaguaacugcu	caguaguauuuaggaguaacugcu	caguaguauuuaggaguaacugcu	0	0	0	0	0	5	0	0	0	0	0	0	0	0	0.570803	0	0	0
48	novel-cli-miR-26-5p	ccccuccacccgcccucccugcugccaggcannnnnnnnnnnnnnnnnnnnnnnnnnnnnnnnnnnngggggggggggggggggc	ccccuccacccgcccucccugcugccaggcannnnnnnnnnnnnnnnnnnnnnnnnnnnnnnnnnnngggggggggggggggggc	ccccuccacccgcccucccugcugccaggcannnnnnnnnnnnnnnnnnnnnnnnnnnnnnnnnnnngggggggggggggggggc	ccccuccacccgcccucccugcugccaggcannnnnnnnnnnnnnnnnnnnnnnnnnnnnnnnnnnngggggggggggggggggc	ccccuccacccgcccucccugcugccaggcannnnnnnnnnnnnnnnnnnnnnnnnnnnnnnnnnnngggggggggggggggggc	guccccuccacccgcccucccugcugccaggcannnnnnnnnnnnnnnnnnnnnnnnnnnnnnnnnnnngggggggggggggggggccg	ccccuccacccgcccucccugcugccaggcannnnnnnnnnnnnnnnnnnnnnnnnnnnnnnnnnnngggggggggggggggggc	ccccuccacccgcccucccugcugccaggcannnnnnnnnnnnnnnnnnnnnnnnnnnnnnnnnnnngggggggggggggggggc	ccccuccacccgcccucccugcugccaggcannnnnnnnnnnnnnnnnnnnnnnnnnnnnnnnnnnngggggggggggggggggc	ccccuccacccgcccucccu	ccccuccacccgcccucccu	ccccuccacccgcccucccu	ccccuccacccgcccucccu	ccccuccacccgcccucccu	guccccuccacccgcccuccc	ccccuccacccgcccucccu	ccccuccacccgcccucccu	ccccuccacccgcccucccu	0	0	0	0	0	8	0	0	0	0	0	0	0	0	0.913284	0	0	0
49	novel-cli-miR-28-3p	uggggugaauugggauagcuccuuguccuccagugaagcuauucugauuugcaccagc	uuuggggugaauugggauagcuccuuguccuccagugaagcuauucugauuugcaccagc	uuuggggugaauugggauagcuccuuguccuccagugaagcuauucugauuugcaccagc	uuuggggugaauugggauagcuccuuguccuccagugaagcuauucugauuugcaccagc	uuuggggugaauugggauagcuccuuguccuccagugaagcuauucugauuugcaccagc	uuuggggugaauugggauagcuccuuguccuccagugaagcuauucugauuugcaccagc	uuuccugggguguuggcguugcucaugguucuuucagugaggccgacaucccagggaagg	uuuggggugaauugggauagcuccuuguccuccagugaagcuauucugauuugcaccagc	uuuggggugaauugggauagcuccuuguccuccagugaagcuauucugauuugcaccagc	agcuauucugauuugcaccagc	agcuauucugauuugcaccagc	agcuauucugauuugcaccagc	agcuauucugauuugcaccagc	agcuauucugauuugcaccagc	agcuauucugauuugcaccagc	ugaggccgacaucccagggaagg	agcuauucugauuugcaccagc	agcuauucugauuugcaccagc	41	0	0	0	0	0	0	0	0	4.97704	0	0	0	0	0	0	0	0
50	novel-cli-miR-28-5p	uggggugaauugggauagcuccuuguccuccagugaagcuauucugauuugcaccagc	uuuggggugaauugggauagcuccuuguccuccagugaagcuauucugauuugcaccagc	uuuggggugaauugggauagcuccuuguccuccagugaagcuauucugauuugcaccagc	uuuggggugaauugggauagcuccuuguccuccagugaagcuauucugauuugcaccagc	uuuggggugaauugggauagcuccuuguccuccagugaagcuauucugauuugcaccagc	uuuggggugaauugggauagcuccuuguccuccagugaagcuauucugauuugcaccagc	uuuccugggguguuggcguugcucaugguucuuucagugaggccgacaucccagggaagg	uuuggggugaauugggauagcuccuuguccuccagugaagcuauucugauuugcaccagc	uuuggggugaauugggauagcuccuuguccuccagugaagcuauucugauuugcaccagc	uggggugaauugggauagcucc	uuuggggugaauugggauagcu	uuuggggugaauugggauagcu	uuuggggugaauugggauagcu	uuuggggugaauugggauagcu	uuuggggugaauugggauagcu	uuuccugggguguuggcguugcu	uuuggggugaauugggauagcu	uuuggggugaauugggauagcu	0	0	0	0	0	0	4	0	0	0	0	0	0	0	0	0.422331	0	0
51	novel-cli-miR-30-3p	caugcacacacacacggugcacgggcacggcgcucauccaccacacacggaugcggugcacggacaccgugcucgugcauggu	caugcacacacacacggugcacgggcacggcgcucauccaccacacacggaugcggugcacggacaccgugcucgugcauggu	caugcacacacacacggugcacgggcacggcgcucauccaccacacacggaugcggugcacggacaccgugcucgugcauggu	caugcacacacacacggugcacgggcacggcgcucauccaccacacacggaugcggugcacggacaccgugcucgugcauggu	caugcacacacacacggugcacgggcacggcgcucauccaccacacacggaugcggugcacggacaccgugcucgugcauggu	caugcacacacacacggugcacgggcacggcgcucauccaccacacacggaugcggugcacggacaccgugcucgugcauggu	caugcacacacacacggugcacgggcacggcgcucauccaccacacacggaugcggugcacggacaccgugcucgugcauggu	cagaacaagaaccggcucuguucuggugcgggacugggcugccagaacaagaaccggcucuguucuggu	caugcacacacacacggugcacgggcacggcgcucauccaccacacacggaugcggugcacggacaccgugcucgugcauggu	acggacaccgugcucgugcauggu	acggacaccgugcucgugcauggu	acggacaccgugcucgugcauggu	acggacaccgugcucgugcauggu	acggacaccgugcucgugcauggu	acggacaccgugcucgugcauggu	acggacaccgugcucgugcauggu	aagaaccggcucuguucuggu	acggacaccgugcucgugcauggu	0	0	0	0	0	0	0	10	0	0	0	0	0	0	0	0	1.11968	0
52	novel-cli-miR-31-3p	cggcagcgccuuuguggggagagcgcagcggcggagcagcggc	cggcagcgccuuuguggggagagcgcagcggcggagcagcggc	cggcagcgccuuuguggggagagcgcagcggcggagcagcggc	uccacaaaggcuuccaggugucuggugucccugugacauggaggugccuuuguggacg	cggcagcgccuuuguggggagagcgcagcggcggagcagcggc	gcagcgccuuuguggggagagcgcagcggcggagcag	cggcagcgccuuuguggggagagcgcagcggcggagcagcggc	cggcagcgccuuuguggggagagcgcagcggcggagcagcggc	cggcagcgccuuuguggggagagcgcagcggcggagcagcggc	cgcagcggcggagcagcggc	cgcagcggcggagcagcggc	cgcagcggcggagcagcggc	cauggaggugccuuuguggacg	cgcagcggcggagcagcggc	agcgcagcggcggagcag	cgcagcggcggagcagcggc	cgcagcggcggagcagcggc	cgcagcggcggagcagcggc	0	0	0	6	0	10	0	0	0	0	0	0	0.722733	0	1.14161	0	0	0
53	novel-cli-miR-32-5p	gcccggacgccugggucccuccucagugcaaucuauggggcccggacgccugggucccuccucagugcaaucuauggggcccggacgccuggguccc	gcccggacgccugggucccuccucagugcaaucuauggggcccggacgccugggucccuccucagugcaaucuauggggcccggacgccuggguccc	gcccggacgccugggucccuccucagugcaaucuauggggcccggacgccugggucccuccucagugcaaucuauggggcccggacgccuggguccc	gcccggacgccugggucccuccucagugcaaucuauggggcccggacgccugggucccuccucagugcaaucuauggggcccggacgccuggguccc	gcccggacgccugggucccuccucagugcaaucuauggggcccggacgccugggucccuccucagugcaaucuauggggcccggacgccuggguccc	gcccggacgccugggucccuccucagugcaaucuauggggcccggacgccugggucccuccucagugcaaucuauggggcccggacgccuggguccc	cagaacuccugggucccaucccggacuccugggucccucccggacuccugggucccacccgaucugcu	gcccggacgccugggucccuccucagugcaaucuauggggcccggacgccugggucccuccucagugcaaucuauggggcccggacgccuggguccc	gcccggacgccugggucccuccucagugcaaucuauggggcccggacgccugggucccuccucagugcaaucuauggggcccggacgccuggguccc	gcccggacgccuggguccc	gcccggacgccuggguccc	gcccggacgccuggguccc	gcccggacgccuggguccc	gcccggacgccuggguccc	gcccggacgccuggguccc	cagaacuccuggguccc	gcccggacgccuggguccc	gcccggacgccuggguccc	0	0	0	0	0	0	6	0	0	0	0	0	0	0	0	0.633497	0	0
54	novel-cli-miR-33-3p	accaggagucugugcuaccgugugagguuuucucaucauggagcugugacuccuggacu	accaggagucugugcuaccgugugagguuuucucaucauggagcugugacuccuggacu	aaccaggagucugugcuaccgugugagguuuucucaucauggagcugugacuccuggacu	accaggagucugugcuaccgugugagguuuucucaucauggagcugugacuccuggacu	aaccaggagucugugcuaccgugugagguuuucucaucauggagcugugacuccuggacu	accaggagucugugcuaccgugugagguuuucucaucauggagcugugacuccuggacu	aaccaggagucugugcuaccgugugagguuuucucaucauggagcugugacuccuggacu	aaccaggagucugugcuaccgugugagguuuucucaucauggagcugugacuccuggacu	accaggagucugugcuaccgugugagguuuucucaucauggagcugugacuccuggacu	uggagcugugacuccuggacu	uggagcugugacuccuggacu	uggagcugugacuccuggacu	uggagcugugacuccuggacu	uggagcugugacuccuggacu	uggagcugugacuccuggacu	uggagcugugacuccuggacu	uggagcugugacuccuggacu	uggagcugugacuccuggacu	9	13	5	7	13	7	6	5	6	1.09252	1.6462	0.507038	0.843188	1.55584	0.799124	0.633497	0.55984	0.540653
55	novel-cli-miR-33-5p	accaggagucugugcuaccgugugagguuuucucaucauggagcugugacuccuggacu	accaggagucugugcuaccgugugagguuuucucaucauggagcugugacuccuggacu	aaccaggagucugugcuaccgugugagguuuucucaucauggagcugugacuccuggacu	accaggagucugugcuaccgugugagguuuucucaucauggagcugugacuccuggacu	aaccaggagucugugcuaccgugugagguuuucucaucauggagcugugacuccuggacu	accaggagucugugcuaccgugugagguuuucucaucauggagcugugacuccuggacu	aaccaggagucugugcuaccgugugagguuuucucaucauggagcugugacuccuggacu	aaccaggagucugugcuaccgugugagguuuucucaucauggagcugugacuccuggacu	accaggagucugugcuaccgugugagguuuucucaucauggagcugugacuccuggacu	accaggagucugugcuaccgug	accaggagucugugcuaccgug	aaccaggagucugugcuaccgug	accaggagucugugcuaccgug	aaccaggagucugugcuaccgugu	accaggagucugugcuaccgug	aaccaggagucugugcuaccgugug	aaccaggagucugugcuaccgu	accaggagucugugcuaccgug	0	0	1	0	1	0	2	1	0	0	0	0.101408	0	0.11968	0	0.211166	0.111968	0
56	novel-cli-miR-37-5p	auaaccaauauauauauugguuaugaauauaugaaccaauauauauauugguuucau	auaaccaauauauauauugguuaugaauauaugaaccaauauauauauugguuucau	auaaccaauauauauauugguuaugaauauaugaaccaauauauauauugguuucau	auaaccaauauauauauugguuaugaauauaugaaccaauauauauauugguuucau	auaaccaauauauauauugguuaugaauauaugaaccaauauauauauugguuucau	auaaccaauauauauauugguuaugaauauaugaaccaauauauauauugguuucau	auaaccaauauauauauugguuaugaauauaugaaccaauauauauauugguuucau	auaaccaauauauauauugguuaugaauauaugaaccaauauauauauugguuucau	auaaccaauauauauauugguuaugaauauaugaaccaauauauauauugguuucau	auaaccaauauauauauugguu	auaaccaauauauauauugguu	auaaccaauauauauauugguu	auaaccaauauauauauugguu	auaaccaauauauauauugguu	auaaccaauauauauauugguu	auaaccaauauauauauugguu	auaaccaauauauauauugguu	auaaccaauauauauauugguu	0	0	10	0	0	0	0	0	0	0	0	1.01408	0	0	0	0	0	0
57	novel-cli-miR-39-5p	cuguagcuguagcuguagcuguagccucuccacaguuggugauguucaucagcucacguuacguugcugua	cuguagcuguagcuguagcuguagccucuccacaguuggugauguucaucagcucacguuacguugcugua	cuguagcuguagcuguagcuguagccucuccacaguuggugauguucaucagcucacguuacguugcugua	cuguagcuguagcuguagcuguagccucuccacaguuggugauguucaucagcucacguuacguugcugua	cuguagcuguagcuguagcuguagccucuccacaguuggugauguucaucagcucacguuacguugcugua	cuguagcuguagcuguagcuguagccucuccacaguuggugauguucaucagcucacguuacguugcugua	cuguagcuguagcuguagcuguagccucuccacaguuggugauguucaucagcucacguuacguugcugua	cuguagcuguagcuguagcuguagccucuccacaguuggugauguucaucagcucacguuacguugcugua	cuguagcuguagcuguagcuguagccucuccacaguuggugauguucaucagcucacguuacguugcugua	cuguagcuguagcuguagcugu	cuguagcuguagcuguagcugu	cuguagcuguagcuguagcugu	cuguagcuguagcuguagcugu	cuguagcuguagcuguagcugu	cuguagcuguagcuguagcugu	cuguagcuguagcuguagcugu	cuguagcuguagcuguagcugu	cuguagcuguagcuguagcugu	13	16	0	0	0	0	0	0	0	1.57809	2.02609	0	0	0	0	0	0	0
58	novel-cli-miR-42-3p	cuuggcagggaagcugcugccugcagagcaaauccuucugccugcgcagcccugccuuccu	cuuggcagggaagcugcugccugcagagcaaauccuucugccugcgcagcccugccuuccu	cuuggcagggaagcugcugccugcagagcaaauccuucugccugcgcagcccugccuuccu	cuuggcagggaagcugcugccugcagagcaaauccuucugccugcgcagcccugccuuccu	cuuggcagggaagcugcugccugcagagcaaauccuucugccugcgcagcccugccuucc	cuuggcagggaagcugcugccugcagagcaaauccuucugccugcgcagcccugccuuccu	cuuggcagggaagcugcugccugcagagcaaauccuucugccugcgcagcccugccuuccu	cuuggcagggaagcugcugccugcagagcaaauccuucugccugcgcagcccugccuuccu	cuuggcagggaagcugcugccugcagagcaaauccuucugccugcgcagcccugccuuccu	ccugcgcagcccugccuuccu	ccugcgcagcccugccuuccu	ccugcgcagcccugccuuccu	ccugcgcagcccugccuuccu	ugccugcgcagcccugccuucc	ccugcgcagcccugccuuccu	ccugcgcagcccugccuuccu	ccugcgcagcccugccuuccu	ccugcgcagcccugccuuccu	0	0	0	0	3	0	0	0	0	0	0	0	0	0.35904	0	0	0	0
59	novel-cli-miR-4-3p	ccccggugcccugcccgccuccuguggauuuacacucaacacagagagcucagugcccggcugc	agcucuggcugagcaguccugaggaguuuacucugagcccaggcugcucagcuggggcugc	cccggugcccugcccgccuccuguggauuuacacucaacacagagagcucagugcccggcug	agcucuggcugagcaguccugaggaguuuacucugagcccaggcugcucagcuggggcugc	ccccggugcccugcccgccuccuguggauuuacacucaacacagagagcucagugcccggcugc	ccccggugcccugcccgccuccuguggauuuacacucaacacagagagcucagugcccggcugc	ccccggugcccugcccgccuccuguggauuuacacucaacacagagagcucagugcccggcugc	ccccggugcccugcccgccuccuguggauuuacacucaacacagagagcucagugcccggcugc	ccccggugcccugcccgccuccuguggauuuacacucaacacagagagcucagugcccggcugc	cagagagcucagugcccggcugc	caggcugcucagcuggggcugc	cagagagcucagugcccggcug	caggcugcucagcuggggcugc	cagagagcucagugcccggcugc	cagagagcucagugcccggcugc	cagagagcucagugcccggcugc	cagagagcucagugcccggcugc	cagagagcucagugcccggcugc	9	3	12	2	0	0	0	0	0	1.09252	0.379893	1.21689	0.240911	0	0	0	0	0
60	novel-cli-miR-45-3p	cuucagucuuguuuuccugugccaaucaaugauucaugaauucgggacuggagugcu	cuucagucuuguuuuccugugccaaucaaugauucaugaauucgggacuggagugcu	cuucagucuuguuuuccugugccaaucaaugauucaugaauucgggacuggagugcu	cuucagucuuguuuuccugugccaaucaaugauucaugaauucgggacuggagugcu	cuucagucuuguuuuccugugccaaucaaugauucaugaauucgggacuggagugcu	cuucagucuuguuuuccugugccaaucaaugauucaugaauucgggacuggagugcu	cuucagucuuguuuuccugugccaaucaaugauucaugaauucgggacuggagugcu	cuucagucuuguuuuccugugccaaucaaugauucaugaauucgggacuggagugcu	cuucagucuuguuuuccugugccaaucaaugauucaugaauucgggacuggagugcu	ugaauucgggacuggagugcu	ugaauucgggacuggagugcu	ugaauucgggacuggagugcu	ugaauucgggacuggagugcu	ugaauucgggacuggagugcu	ugaauucgggacuggagugcu	ugaauucgggacuggagugcu	ugaauucgggacuggagugcu	ugaauucgggacuggagugcu	19	25	25	0	0	0	0	0	0	2.30644	3.16577	2.53519	0	0	0	0	0	0
61	novel-cli-miR-4-5p	ccccggugcccugcccgccuccuguggauuuacacucaacacagagagcucagugcccggcugc	agcucuggcugagcaguccugaggaguuuacucugagcccaggcugcucagcuggggcugc	cccggugcccugcccgccuccuguggauuuacacucaacacagagagcucagugcccggcug	agcucuggcugagcaguccugaggaguuuacucugagcccaggcugcucagcuggggcugc	ccccggugcccugcccgccuccuguggauuuacacucaacacagagagcucagugcccggcugc	ccccggugcccugcccgccuccuguggauuuacacucaacacagagagcucagugcccggcugc	ccccggugcccugcccgccuccuguggauuuacacucaacacagagagcucagugcccggcugc	ccccggugcccugcccgccuccuguggauuuacacucaacacagagagcucagugcccggcugc	ccccggugcccugcccgccuccuguggauuuacacucaacacagagagcucagugcccggcugc	ccccggugcccugcccgccuccugug	agcucuggcugagcaguccuga	cccggugcccugcccgccuccugug	agcucuggcugagcaguccugag	ccccggugcccugcccgccuccugug	ccccggugcccugcccgccuccugug	ccccggugcccugcccgccuccugug	ccccggugcccugcccgccuccugug	ccccggugcccugcccgccuccugug	0	1	0	0	0	0	0	0	0	0	0.126631	0	0	0	0	0	0	0
62	novel-cli-miR-48-3p	uuuggccacagaugggcugugggagacaaugcacaggcaagacguggcuagaau	uuuggccacagaugggcugugggagacaaugcacaggcaagacguggcuagaau	uuuggccacagaugggcugugggagacaaugcacaggcaagacguggcuagaau	uuuggccacagaugggcugugggagacaaugcacaggcaagacguggcuagaau	uuuggccacagaugggcugugggagacaaugcacaggcaagacguggcuagaau	uuuggccacagaugggcugugggagacaaugcacaggcaagacguggcuagaau	uuuggccacagaugggcugugggagacaaugcacaggcaagacguggcuagaau	uuuggccacagaugggcugugggagacaaugcacaggcaagacguggcuagaau	uuuggccacagaugggcugugggagacaaugcacaggcaagacguggcuagaau	caagacguggcuagaau	caagacguggcuagaau	caagacguggcuagaau	caagacguggcuagaau	caagacguggcuagaau	caagacguggcuagaau	caagacguggcuagaau	caagacguggcuagaau	caagacguggcuagaau	0	0	0	0	0	1403	0	0	0	0	0	0	0	0	160.167	0	0	0
63	novel-cli-miR-53-5p	uaauacagguuggugcaagugaguacuaaaaucucacuugcaacaaccuguauuaca	uaauacagguuggugcaagugaguacuaaaaucucacuugcaacaaccuguauuaca	uaauacagguuggugcaagugaguacuaaaaucucacuugcaacaaccuguauuaca	uaauacagguuggugcaagugaguacuaaaaucucacuugcaacaaccuguauuaca	uaauacagguuggugcaagugaguacuaaaaucucacuugcaacaaccuguauuaca	uaauacagguuggugcaagugaguacuaaaaucucacuugcaacaaccuguauuaca	uaauacagguuggugcaagugaguacuaaaaucucacuugcaacaaccuguauuaca	uaauacagguuggugcaagugaguacuaaaaucucacuugcaacaaccuguauuaca	uaauacagguuggugcaagugaguacuaaaaucucacuugcaacaaccuguauuaca	uaauacagguuggugcaaguga	uaauacagguuggugcaaguga	uaauacagguuggugcaaguga	uaauacagguuggugcaaguga	uaauacagguuggugcaaguga	uaauacagguuggugcaaguga	uaauacagguuggugcaaguga	uaauacagguuggugcaaguga	uaauacagguuggugcaaguga	0	0	0	0	0	0	4	0	0	0	0	0	0	0	0	0.422331	0	0
64	novel-cli-miR-60-3p	ggggaugcacgguggaugcacguguuuguagcgacugugcaacugccgugagcauccucgc	ggggaugcacgguggaugcacguguuuguagcgacugugcaacugccgugagcauccucgc	ggggaugcacgguggaugcacguguuuguagcgacugugcaacugccgugagcauccucgc	ggggaugcacgguggaugcacguguuuguagcgacugugcaacugccgugagcauccucgc	ggggaugcacgguggaugcacguguuuguagcgacugugcaacugccgugagcauccucgc	ggggaugcacgguggaugcacguguuuguagcgacugugcaacugccgugagcauccucgc	ggggaugcacgguggaugcacguguuuguagcgacugugcaacugccgugagcauccucgc	ggggaugcacgguggaugcacguguuuguagcgacugugcaacugccgugagcauccucgc	ggggaugcacgguggaugcacguguuuguagcgacugugcaacugccgugagcauccucgc	ugcaacugccgugagcauccucgc	ugcaacugccgugagcauccucgc	ugcaacugccgugagcauccucgc	ugcaacugccgugagcauccucgc	ugcaacugccgugagcauccucgc	ugcaacugccgugagcauccucgc	ugcaacugccgugagcauccucgc	ugcaacugccgugagcauccucgc	ugcaacugccgugagcauccucgc	0	0	0	0	17	0	0	0	0	0	0	0	0	2.03456	0	0	0	0
65	novel-cli-miR-61-3p	accucuggcagaacuggaguccugacagagaguuucgucagcgguggcugcucg	accucuggcagaacuggaguccugacagagaguuucgucagcgguggcugcucg	ugcugucaccucuggcagaacuggaguccugacagagaguuucgucagcgguggcugcucg	accucuggcagaacuggaguccugacagagaguuucgucagcgguggcugcucg	aucccucuuugcggaacugcuuucgagaggcuggagagcggcucugugcagagggaucugg	accucuggcagaacuggaguccugacagagaguuucgucagcgguggcugcucg	accucuggcagaacuggaguccugacagagaguuucgucagcgguggcugcucg	accucuggcagaacuggaguccugacagagaguuucgucagcgguggcugcucg	accucuggcagaacuggaguccugacagagaguuucgucagcgguggcugcucg	uuucgucagcgguggcugcucg	uuucgucagcgguggcugcucg	uuucgucagcgguggcugcucg	uuucgucagcgguggcugcucg	cggcucugugcagagggaucugg	uuucgucagcgguggcugcucg	uuucgucagcgguggcugcucg	uuucgucagcgguggcugcucg	uuucgucagcgguggcugcucg	0	9	8	0	1	0	0	0	0	0	1.13968	0.811261	0	0.11968	0	0	0	0
66	novel-cli-miR-61-5p	accucuggcagaacuggaguccugacagagaguuucgucagcgguggcugcucg	accucuggcagaacuggaguccugacagagaguuucgucagcgguggcugcucg	ugcugucaccucuggcagaacuggaguccugacagagaguuucgucagcgguggcugcucg	accucuggcagaacuggaguccugacagagaguuucgucagcgguggcugcucg	aucccucuuugcggaacugcuuucgagaggcuggagagcggcucugugcagagggaucugg	accucuggcagaacuggaguccugacagagaguuucgucagcgguggcugcucg	accucuggcagaacuggaguccugacagagaguuucgucagcgguggcugcucg	accucuggcagaacuggaguccugacagagaguuucgucagcgguggcugcucg	accucuggcagaacuggaguccugacagagaguuucgucagcgguggcugcucg	accucuggcagaacugg	accucuggcagaacugg	ugcugucaccucuggcagaacu	accucuggcagaacugg	aucccucuuugcggaacugcu	accucuggcagaacugg	accucuggcagaacugg	accucuggcagaacugg	accucuggcagaacugg	0	1	0	0	4	0	0	0	0	0	0.126631	0	0	0.47872	0	0	0	0
67	novel-cli-miR-67-3p	cagcagaggaaauccagacgagcucccuuucaccacagugggacuugucucuacaccucugcaac	cagcagaggaaauccagacgagcucccuuucaccacagugggacuugucucuacaccucugcaac	cagcagaggaaauccagacgagcucccuuucaccacagugggacuugucucuacaccucugcaac	cagcagaggaaauccagacgagcucccuuucaccacagugggacuugucucuacaccucugcaac	cagcagaggaaauccagacgagcucccuuucaccacagugggacuugucucuacaccucugcaac	cagcagaggaaauccagacgagcucccuuucaccacagugggacuugucucuacaccucugcaac	cagcagaggaaauccagacgagcucccuuucaccacagugggacuugucucuacaccucugcaac	cagcagaggaaauccagacgagcucccuuucaccacagugggacuugucucuacaccucugcaac	cagcagaggaaauccagacgagcucccuuucaccacagugggacuugucucuacaccucugcaac	cuugucucuacaccucugcaac	cuugucucuacaccucugcaac	cuugucucuacaccucugcaac	cuugucucuacaccucugcaac	cuugucucuacaccucugcaac	cuugucucuacaccucugcaac	cuugucucuacaccucugcaac	cuugucucuacaccucugcaac	cuugucucuacaccucugcaac	14	0	6	0	0	0	0	0	0	1.69948	0	0.608446	0	0	0	0	0	0
68	novel-cli-miR-67-5p	cagcagaggaaauccagacgagcucccuuucaccacagugggacuugucucuacaccucugcaac	cagcagaggaaauccagacgagcucccuuucaccacagugggacuugucucuacaccucugcaac	cagcagaggaaauccagacgagcucccuuucaccacagugggacuugucucuacaccucugcaac	cagcagaggaaauccagacgagcucccuuucaccacagugggacuugucucuacaccucugcaac	cagcagaggaaauccagacgagcucccuuucaccacagugggacuugucucuacaccucugcaac	cagcagaggaaauccagacgagcucccuuucaccacagugggacuugucucuacaccucugcaac	cagcagaggaaauccagacgagcucccuuucaccacagugggacuugucucuacaccucugcaac	cagcagaggaaauccagacgagcucccuuucaccacagugggacuugucucuacaccucugcaac	cagcagaggaaauccagacgagcucccuuucaccacagugggacuugucucuacaccucugcaac	cagcagaggaaauccagacgagcu	cagcagaggaaauccagacgagcucc	cagcagaggaaauccagacgagcuc	cagcagaggaaauccagacgagcucc	cagcagaggaaauccagacgagcucc	cagcagaggaaauccagacgagcucc	cagcagaggaaauccagacgagcucc	cagcagaggaaauccagacgagcucc	cagcagaggaaauccagacgagcucc	23	0	30	0	0	0	0	0	0	2.792	0	3.04223	0	0	0	0	0	0
69	novel-cli-miR-70-5p	acacguaucaggcagucucccagaagagaagccacugggaagacagcuugauaagugaau	acacguaucaggcagucucccagaagagaagccacugggaagacagcuugauaagugaau	acacguaucaggcagucucccagaagagaagccacugggaagacagcuugauaagugaau	acacguaucaggcagucucccagaagagaagccacugggaagacagcuugauaagugaau	acacguaucaggcagucucccagaagagaagccacugggaagacagcuugauaagugaau	acacguaucaggcagucucccagaagagaagccacugggaagacagcuugauaagugaau	acacguaucaggcagucucccagaagagaagccacugggaagacagcuugauaagugaau	acacguaucaggcagucucccagaagagaagccacugggaagacagcuugauaagugaau	acacguaucaggcagucucccagaagagaagccacugggaagacagcuugauaagugaau	acacguaucaggcagucucccaga	acacguaucaggcagucucccaga	acacguaucaggcagucucccaga	acacguaucaggcagucucccaga	acacguaucaggcagucucccaga	acacguaucaggcagucucccaga	acacguaucaggcagucucccaga	acacguaucaggcagucucccag	acacguaucaggcagucucccaga	0	0	0	0	0	0	10	8	0	0	0	0	0	0	0	1.05583	0.895744	0
70	novel-cli-miR-74-3p	uccuuucaggugcccgaaagcggcguuaccuccagccacgcuuccgagcugccugaaagggu	uccuuucaggugcccgaaagcggcguuaccuccagccacgcuuccgagcugccugaaagggu	uccuuucaggugcccgaaagcggcguuaccuccagccacgcuuccgagcugccugaaagggu	uccuuucaggugcccgaaagcggcguuaccuccagccacgcuuccgagcugccugaaagggu	uccuuucaggugcccgaaagcggcguuaccuccagccacgcuuccgagcugccugaaagggu	uccuuucaggugcccgaaagcggcguuaccuccagccacgcuuccgagcugccugaaagggu	uccuuucaggugcccgaaagcggcguuaccuccagccacgcuuccgagcugccugaaagggu	uccuuucaggugcccgaaagcggcguuaccuccagccacgcuuccgagcugccugaaaggguu	uccuuucaggugcccgaaagcggcguuaccuccagccacgcuuccgagcugccugaaagggu	cuuccgagcugccugaaagggu	cuuccgagcugccugaaagggu	cuuccgagcugccugaaagggu	cuuccgagcugccugaaagggu	cuuccgagcugccugaaagggu	cuuccgagcugccugaaagggu	cuuccgagcugccugaaagggu	cuuccgagcugccugaaaggguu	cuuccgagcugccugaaagggu	0	4	0	0	0	0	0	14	0	0	0.506524	0	0	0	0	0	1.56755	0
71	novel-cli-miR-75-3p	ugcugcaaaagcaauugcugcaacagaaggucuucauugcagcaauugcuuuugcagcagu	ugcugcaaaagcaauugcugcaacagaaggucuucauugcagcaauugcuuuugcagcagu	cugcugcaaaagcaauugcugcaacagaaggucuucauugcagcaauugcuuuugcagcagu	ugcugcaaaagcaauugcugcaacagaaggucuucauugcagcaauugcuuuugcagcagu	acugcugcaaaagcaauugcugcaacagaaggucuucauugcagcaauugcuuuugcagcagu	ugcugcaaaagcaauugcugcaacagaaggucuucauugcagcaauugcuuuugcagcagu	ugcugcaaaagcaauugcugcaacagaaggucuucauugcagcaauugcuuuugcagcagu	ugcugcaaaagcaauugcugcaacagaaggucuucauugcagcaauugcuuuugcagcagu	ugcugcaaaagcaauugcugcaacagaaggucuucauugcagcaauugcuuuugcagcagu	cagcaauugcuuuugcagcagu	cagcaauugcuuuugcagcagu	cagcaauugcuuuugcagcagu	cagcaauugcuuuugcagcagu	cagcaauugcuuuugcagcagu	cagcaauugcuuuugcagcagu	cagcaauugcuuuugcagcagu	cagcaauugcuuuugcagcagu	cagcaauugcuuuugcagcagu	0	0	17	12	9	12	10	15	19	0	0	1.72393	1.44547	1.07712	1.36993	1.05583	1.67952	1.71207
72	novel-cli-miR-75-5p	ugcugcaaaagcaauugcugcaacagaaggucuucauugcagcaauugcuuuugcagcagu	ugcugcaaaagcaauugcugcaacagaaggucuucauugcagcaauugcuuuugcagcagu	cugcugcaaaagcaauugcugcaacagaaggucuucauugcagcaauugcuuuugcagcagu	ugcugcaaaagcaauugcugcaacagaaggucuucauugcagcaauugcuuuugcagcagu	acugcugcaaaagcaauugcugcaacagaaggucuucauugcagcaauugcuuuugcagcagu	ugcugcaaaagcaauugcugcaacagaaggucuucauugcagcaauugcuuuugcagcagu	ugcugcaaaagcaauugcugcaacagaaggucuucauugcagcaauugcuuuugcagcagu	ugcugcaaaagcaauugcugcaacagaaggucuucauugcagcaauugcuuuugcagcagu	ugcugcaaaagcaauugcugcaacagaaggucuucauugcagcaauugcuuuugcagcagu	ugcugcaaaagcaauugcugca	ugcugcaaaagcaauugcugca	cugcugcaaaagcaauugcug	ugcugcaaaagcaauugcugc	acugcugcaaaagcaauugcug	ugcugcaaaagcaauugcugc	ugcugcaaaagcaauugcugca	ugcugcaaaagcaauugcugc	ugcugcaaaagcaauugcug	0	0	1	1	4	1	0	6	2	0	0	0.101408	0.120455	0.47872	0.114161	0	0.671808	0.180218
73	novel-cli-miR-77-5p	uuaaaccaucagaaaucugccugcugucuuuuucagggcuaguuuuugcugguuuaucu	uuaaaccaucagaaaucugccugcugucuuuuucagggcuaguuuuugcugguuuaucu	uuaaaccaucagaaaucugccugcugucuuuuucagggcuaguuuuugcugguuuaucu	uuaaaccaucagaaaucugccugcugucuuuuucagggcuaguuuuugcugguuuaucu	uuaaaccaucagaaaucugccugcugucuuuuucagggcuaguuuuugcugguuuaucu	uuaaaccaucagaaaucugccugcugucuuuuucagggcuaguuuuugcugguuuaucu	uuaaaccaucagaaaucugccugcugucuuuuucagggcuaguuuuugcugguuuaucu	uuaaaccaucagaaaucugccugcugucuuuuucagggcuaguuuuugcugguuuaucu	uuaaaccaucagaaaucugccugcugucuuuuucagggcuaguuuuugcugguuuaucu	uuaaaccaucagaaaucugccu	uuaaaccaucagaaaucugccu	uuaaaccaucagaaaucugccu	uuaaaccaucagaaaucugccu	uuaaaccaucagaaaucugccu	uuaaaccaucagaaaucugccu	uuaaaccaucagaaaucugccu	uuaaaccaucagaaaucugccu	uuaaaccaucagaaaucugccu	0	22	15	0	0	35	0	0	32	0	2.78588	1.52111	0	0	3.99562	0	0	2.88349
74	novel-cli-miR-78-3p	uugguguaaacugaugccgacccugggaugucagaccagcgugaccaguuuacuccugcu	uugguguaaacugaugccgacccugggaugucagaccagcgugaccaguuuacuccugcu	uugguguaaacugaugccgacccugggaugucagaccagcgugaccaguuuacuccugcu	uugguguaaacugaugccgacccugggaugucagaccagcgugaccaguuuacuccugcu	uugguguaaacugaugccgacccugggaugucagaccagcgugaccaguuuacuccugcu	uugguguaaacugaugccgacccugggaugucagaccagcgugaccaguuuacuccugcu	uugguguaaacugaugccgacccugggaugucagaccagcgugaccaguuuacuccugcu	uugguguaaacugaugccgacccugggaugucagaccagcgugaccaguuuacuccugcu	uugguguaaacugaugccgacccugggaugucagaccagcgugaccaguuuacuccugcu	gcgugaccaguuuacuccugcu	gcgugaccaguuuacuccugcu	gcgugaccaguuuacuccugcu	gcgugaccaguuuacuccugcu	gcgugaccaguuuacuccugcu	gcgugaccaguuuacuccugcu	gcgugaccaguuuacuccugcu	gcgugaccaguuuacuccugcu	gcgugaccaguuuacuccugcu	6	0	0	3	3	4	0	0	0	0.728348	0	0	0.361366	0.35904	0.456642	0	0	0
75	novel-cli-miR-78-5p	uugguguaaacugaugccgacccugggaugucagaccagcgugaccaguuuacuccugcu	uugguguaaacugaugccgacccugggaugucagaccagcgugaccaguuuacuccugcu	uugguguaaacugaugccgacccugggaugucagaccagcgugaccaguuuacuccugcu	uugguguaaacugaugccgacccugggaugucagaccagcgugaccaguuuacuccugcu	uugguguaaacugaugccgacccugggaugucagaccagcgugaccaguuuacuccugcu	uugguguaaacugaugccgacccugggaugucagaccagcgugaccaguuuacuccugcu	uugguguaaacugaugccgacccugggaugucagaccagcgugaccaguuuacuccugcu	uugguguaaacugaugccgacccugggaugucagaccagcgugaccaguuuacuccugcu	uugguguaaacugaugccgacccugggaugucagaccagcgugaccaguuuacuccugcu	uugguguaaacugaugccgacccu	uugguguaaacugaugccgacccu	uugguguaaacugaugccgacccu	uugguguaaacugaugccgacccugg	uugguguaaacugaugccgacccug	uugguguaaacugaugccgacccug	uugguguaaacugaugccgacccu	uugguguaaacugaugccgacccu	uugguguaaacugaugccgacccu	5	0	0	1	0	0	0	0	0	0.606957	0	0	0.120455	0	0	0	0	0
76	novel-cli-miR-80-3p	aaucggugaagggcaggacgagcggugcgggugcccgggcugcccggcaccgguucc	aaucggugaagggcaggacgagcggugcgggugcccgggcugcccggcaccgguucc	aaucggugaagggcaggacgagcggugcgggugcccgggcugcccggcaccgguucc	aaucggugaagggcaggacgagcggugcgggugcccgggcugcccggcaccgguucc	aaucggugaagggcaggacgagcggugcgggugcccgggcugcccggcaccgguucc	aaucggugaagggcaggacgagcggugcgggugcccgggcugcccggcaccgguucc	aaucggugaagggcaggacgagcggugcgggugcccgggcugcccggcaccgguucc	aaucggugaagggcaggacgagcggugcgggugcccgggcugcccggcaccgguucc	aaucggugaagggcaggacgagcggugcgggugcccgggcugcccggcaccgguucc	ccgggcugcccggcaccgguucc	ccgggcugcccggcaccgguucc	ccgggcugcccggcaccgguucc	ccgggcugcccggcaccgguucc	ccgggcugcccggcaccgguucc	ccgggcugcccggcaccgguucc	ccgggcugcccggcaccgguucc	ccgggcugcccggcaccgguucc	ccgggcugcccggcaccgguucc	0	3	0	0	0	0	0	0	0	0	0.379893	0	0	0	0	0	0	0
77	novel-cli-miR-80-5p	aaucggugaagggcaggacgagcggugcgggugcccgggcugcccggcaccgguucc	aaucggugaagggcaggacgagcggugcgggugcccgggcugcccggcaccgguucc	aaucggugaagggcaggacgagcggugcgggugcccgggcugcccggcaccgguucc	aaucggugaagggcaggacgagcggugcgggugcccgggcugcccggcaccgguucc	aaucggugaagggcaggacgagcggugcgggugcccgggcugcccggcaccgguucc	aaucggugaagggcaggacgagcggugcgggugcccgggcugcccggcaccgguucc	aaucggugaagggcaggacgagcggugcgggugcccgggcugcccggcaccgguucc	aaucggugaagggcaggacgagcggugcgggugcccgggcugcccggcaccgguucc	aaucggugaagggcaggacgagcggugcgggugcccgggcugcccggcaccgguucc	aaucggugaagggcaggacgagc	aaucggugaagggcaggacgagc	aaucggugaagggcaggacgagc	aaucggugaagggcaggacgagc	aaucggugaagggcaggacgagc	aaucggugaagggcaggacgagc	aaucggugaagggcaggacgagc	aaucggugaagggcaggacgagc	aaucggugaagggcaggacgagc	0	1	0	0	0	0	0	0	0	0	0.126631	0	0	0	0	0	0	0
78	novel-cli-miR-85-5p	uaugguuuuguacagugcucuacgaagcuguaugaugcugugcaauacuauaca	uaugguuuuguacagugcucuacgaagcuguaugaugcugugcaauacuauaca	uaugguuuuguacagugcucuacgaagcuguaugaugcugugcaauacuauaca	uaugguuuuguacagugcucuacgaagcuguaugaugcugugcaauacuauaca	uaugguuuuguacagugcucuacgaagcuguaugaugcugugcaauacuauaca	uaugguuuuguacagugcucuacgaagcuguaugaugcugugcaauacuauaca	uaugguuuuguacagugcucuacgaagcuguaugaugcugugcaauacuauaca	uaugguuuuguacagugcucuacgaagcuguaugaugcugugcaauacuauaca	uaugguuuuguacagugcucuacgaagcuguaugaugcugugcaauacuauaca	uaugguuuuguacagugcucu	uaugguuuuguacagugcucu	uaugguuuuguacagugcucu	uaugguuuuguacagugcucu	uaugguuuuguacagugcucu	uaugguuuuguacagugcucu	uaugguuuuguacagugcucu	uaugguuuuguacagugcucu	uaugguuuuguacagugcucu	14	0	0	0	0	0	0	0	0	1.69948	0	0	0	0	0	0	0	0
79	novel-cli-miR-86-5p	uaaugcuguccaugacugggguuaaauauuaugaaagaccacagcaugauagcauuacc	uaaugcuguccaugacugggguuaaauauuaugaaagaccacagcaugauagcauuacc	uaaugcuguccaugacugggguuaaauauuaugaaagaccacagcaugauagcauuacc	uaaugcuguccaugacugggguuaaauauuaugaaagaccacagcaugauagcauuacc	uaaugcuguccaugacugggguuaaauauuaugaaagaccacagcaugauagcauuacc	uaaugcuguccaugacugggguuaaauauuaugaaagaccacagcaugauagcauuacc	uuaaugcuguccaugacugggguuaaauauuaugaaagaccacagcaugauagcauuacca	uaaugcuguccaugacugggguuaaauauuaugaaagaccacagcaugauagcauuacc	uaaugcuguccaugacugggguuaaauauuaugaaagaccacagcaugauagcauuacc	uaaugcuguccaugacugggguua	uaaugcuguccaugacugggguua	uaaugcuguccaugacugggguua	uaaugcuguccaugacugggguua	uaaugcuguccaugacugggguua	uaaugcuguccaugacugggguua	uuaaugcuguccaugacuggggu	uaaugcuguccaugacugggguua	uaaugcuguccaugacugggguua	0	0	0	0	0	0	4	0	0	0	0	0	0	0	0	0.422331	0	0
80	novel-cli-miR-90-3p	caccugcggcugugaccgcggcucugagcagccacggcacgaucgccgguguca	caccugcggcugugaccgcggcucugagcagccacggcacgaucgccgguguca	caccugcggcugugaccgcggcucugagcagccacggcacgaucgccgguguca	caccugcggcugugaccgcggcucugagcagccacggcacgaucgccgguguca	caccugcggcugugaccgcggcucugagcagccacggcacgaucgccgguguca	caccugcggcugugaccgcggcucugagcagccacggcacgaucgccgguguca	caccugcggcugugaccgcggcucugagcagccacggcacgaucgccgguguca	ccacugccagccgggucacaccagcugucggugcugcc	caccugcggcugugaccgcggcucugagcagccacggcacgaucgccgguguca	ccacggcacgaucgccgguguca	ccacggcacgaucgccgguguca	ccacggcacgaucgccgguguca	ccacggcacgaucgccgguguca	ccacggcacgaucgccgguguca	ccacggcacgaucgccgguguca	ccacggcacgaucgccgguguca	accagcugucggugcugcc	ccacggcacgaucgccgguguca	0	0	2	0	0	0	0	3	0	0	0	0.202815	0	0	0	0	0.335904	0
81	novel-cli-miR-91-3p	agcgaggaccacuuagaccuguggcgugagagagaggagagcaggacuaagugguccuugcugc	agcgaggaccacuuagaccuguggcgugagagagaggagagcaggacuaagugguccuugcugc	agcgaggaccacuuagaccuguggcgugagagagaggagagcaggacuaagugguccuugcugc	agcgaggaccacuuagaccuguggcgugagagagaggagagcaggacuaagugguccuugcugc	agcgaggaccacuuagaccuguggcgugagagagaggagagcaggacuaagugguccuugcugc	agcgaggaccacuuagaccuguggcgugagagagaggagagcaggacuaagugguccuugcugc	agcgaggaccacuuagaccuguggcgugagagagaggagagcaggacuaagugguccuugcugc	agcgaggaccacuuagaccuguggcgugagagagaggagagcaggacuaagugguccuugcugc	agcgaggaccacuuagaccuguggcgugagagagaggagagcaggacuaagugguccuugcugc	aggacuaagugguccuugcugc	aggacuaagugguccuugcugc	aggacuaagugguccuugcugc	aggacuaagugguccuugcugc	aggacuaagugguccuugcugc	aggacuaagugguccuugcugc	aggacuaagugguccuugcugc	aggacuaagugguccuugcugc	aggacuaagugguccuugcugc	4	3	2	0	0	0	0	0	0	0.485565	0.379893	0.202815	0	0	0	0	0	0
82	novel-cli-miR-91-5p	agcgaggaccacuuagaccuguggcgugagagagaggagagcaggacuaagugguccuugcugc	agcgaggaccacuuagaccuguggcgugagagagaggagagcaggacuaagugguccuugcugc	agcgaggaccacuuagaccuguggcgugagagagaggagagcaggacuaagugguccuugcugc	agcgaggaccacuuagaccuguggcgugagagagaggagagcaggacuaagugguccuugcugc	agcgaggaccacuuagaccuguggcgugagagagaggagagcaggacuaagugguccuugcugc	agcgaggaccacuuagaccuguggcgugagagagaggagagcaggacuaagugguccuugcugc	agcgaggaccacuuagaccuguggcgugagagagaggagagcaggacuaagugguccuugcugc	agcgaggaccacuuagaccuguggcgugagagagaggagagcaggacuaagugguccuugcugc	agcgaggaccacuuagaccuguggcgugagagagaggagagcaggacuaagugguccuugcugc	agcgaggaccacuuagaccugu	agcgaggaccacuuagaccugu	agcgaggaccacuuagaccugu	agcgaggaccacuuagaccugu	agcgaggaccacuuagaccugu	agcgaggaccacuuagaccugu	agcgaggaccacuuagaccugu	agcgaggaccacuuagaccugu	agcgaggaccacuuagaccugu	64	37	82	0	0	0	0	0	10	7.76905	4.68534	8.31542	0	0	0	0	0	0.901089
83	novel-cli-miR-93-3p	uggcaagcuguguuacugacuccuuguaccuagccugggagcaguagcacagggugcugca	uggcaagcuguguuacugacuccuuguaccuagccugggagcaguagcacagggugcugca	uggcaagcuguguuacugacuccuuguaccuagccugggagcaguagcacagggugcugca	uggcaagcuguguuacugacuccuuguaccuagccugggagcaguagcacagggugcugc	uggcaagcuguguuacugacuccuuguaccuagccugggagcaguagcacagggugcugca	uggcaagcuguguuacugacuccuuguaccuagccugggagcaguagcacagggugcugca	uggcaagcuguguuacugacuccuuguaccuagccugggagcaguagcacagggugcugc	uggcaagcuguguuacugacuccuuguaccuagccugggagcaguagcacagggugcugca	uggcaagcuguguuacugacuccuuguaccuagccugggagcaguagcacagggugcugca	agcaguagcacagggugcugca	gagcaguagcacagggugcugca	gagcaguagcacagggugcugca	agcaguagcacagggugcugc	agcaguagcacagggugcugca	gagcaguagcacagggugcugca	agcaguagcacagggugcugc	agcaguagcacagggugcugca	agcaguagcacagggugcugca	0	0	0	1	0	0	1	0	0	0	0	0	0.120455	0	0	0.105583	0	0
84	novel-cli-miR-93-5p	uggcaagcuguguuacugacuccuuguaccuagccugggagcaguagcacagggugcugca	uggcaagcuguguuacugacuccuuguaccuagccugggagcaguagcacagggugcugca	uggcaagcuguguuacugacuccuuguaccuagccugggagcaguagcacagggugcugca	uggcaagcuguguuacugacuccuuguaccuagccugggagcaguagcacagggugcugc	uggcaagcuguguuacugacuccuuguaccuagccugggagcaguagcacagggugcugca	uggcaagcuguguuacugacuccuuguaccuagccugggagcaguagcacagggugcugca	uggcaagcuguguuacugacuccuuguaccuagccugggagcaguagcacagggugcugc	uggcaagcuguguuacugacuccuuguaccuagccugggagcaguagcacagggugcugca	uggcaagcuguguuacugacuccuuguaccuagccugggagcaguagcacagggugcugca	uggcaagcuguguuacugacucc	uggcaagcuguguuacugacuccu	uggcaagcuguguuacugacuccu	uggcaagcuguguuacugacuccu	uggcaagcuguguuacugacucc	uggcaagcuguguuacugacuccu	uggcaagcuguguuacugacuccu	uggcaagcuguguuacugacucc	uggcaagcuguguuacugacucc	0	78	103	7	69	101	87	21	66	0	9.87721	10.445	0.843188	8.25792	11.5302	9.1857	2.35133	5.94719
85	novel-cli-miR-98-3p	gcaugcccuggggggcgggagcggccucugcgcgugcgcgcauguggcgggggggggggggcgggcgcccgcgggggcggggggg	gcaugcccuggggggcgggagcggccucugcgcgugcgcgcauguggcgggggggggggggcgggcgcccgcgggggcggggggg	gcaugcccuggggggcgggagcggccucugcgcgugcgcgcauguggcgggggggggggggcgggcgcccgcgggggcggggggg	gcaugcccuggggggcgggagcggccucugcgcgugcgcgcauguggcgggggggggggggcgggcgcccgcgggggcggggggg	gcaugcccuggggggcgggagcggccucugcgcgugcgcgcauguggcgggggggggggggcgggcgcccgcgggggcggggggg	gcaugcccuggggggcgggagcggccucugcgcgugcgcgcauguggcgggggggggggggcgggcgcccgcgggggcggggggg	gcaugcccuggggggcgggagcggccucugcgcgugcgcgcauguggcgggggggggggggcgggcgcccgcgggggcggggggg	gcaugcccuggggggcgggagcggccucugcgcgugcgcgcauguggcgggggggggggggcgggcgcccgcgggggcggggggg	gcaugcccuggggggcgggagcggccucugcgcgugcgcgcauguggcgggggggggggggcgggcgcccgcgggggcggggggg	cccgcgggggcggggggg	cccgcgggggcggggggg	cccgcgggggcggggggg	cccgcgggggcggggggg	cccgcgggggcggggggg	cccgcgggggcggggggg	cccgcgggggcggggggg	cccgcgggggcggggggg	cccgcgggggcggggggg	0	0	0	0	0	0	0	8	0	0	0	0	0	0	0	0	0.895744	0
86	novel-cli-miR-99-5p	cugucccagccccugccaggaccugcugcuccuggcagcaagccagcuuggcgugu	cugucccagccccugccaggaccugcugcuccuggcagcaagccagcuuggcgugu	cugucccagccccugccaggaccugcugcuccuggcagcaagccagcuuggcgugu	cugucccagccccugccaggaccugcugcuccuggcagcaagccagcuuggcgugu	cugucccagccccugccaggaccugcugcuccuggcagcaagccagcuuggcgugu	cugucccagccccugccaggaccugcugcuccuggcagcaagccagcuuggcgugu	cugucccagccccugccaggaccugcugcuccuggcagcaagccagcuuggcgugu	cugucccagccccugccaggaccugcugcuccuggcagcaagccagcuuggcgugu	cugucccagccccugccaggaccugcugcuccuggcagcaagccagcuuggcgugu	cugucccagccccugcc	cugucccagccccugcc	cugucccagccccugcc	cugucccagccccugcc	cugucccagccccugcc	cugucccagccccugcc	cugucccagccccugcc	cugucccagccccugcc	cugucccagccccugcc	0	51	0	0	0	0	0	0	0	0	6.45818	0	0	0	0	0	0	0
