# Supplementary material for: Identification and expression pattern analysis of miRNAs in pectoral muscle during pigeon (Columba livia) development
Source: PeerJ. 2021 Jun 23;9:e11438. doi: 10.7717/peerj.11438 (PMC8234919; doi:10.7717/peerj.11438)
Supplement: Supplemental Information 7 [file peerj-09-11438-s007.xlsx]

## Sheet: Sheet1
Table S6. List of differentially expressed miRNAs during pectorals development by edgeR.
1d-vs-28d.edgeR.filter				1d-vs-2yr.edgeR.filter				28d-vs-2yr.edgeR.filter
miRNA name	log2(fc)	P Value	FDR	miRNA name	log2(fc)	P Value	FDR	miRNA name	log2(fc)	P Value	FDR
cli-miR-100-3p	-3.09471	0.00229696	0.0187038	cli-let-7c-3p	-3.16797	0.000197634	0.000798601	cli-let-7a-5p	-1.50411	0.00227215	0.0161194
cli-miR-106-3p	-3.02315	0.000677151	0.00818737	cli-let-7c-5p	-1.73398	0.00420514	0.0129088	cli-let-7c-5p	-1.56681	0.00488183	0.029136
cli-miR-106-5p	-2.20109	0.00348427	0.0252768	cli-let-7f-3p	-2.00136	0.00767572	0.0211082	cli-let-7e-5p	-1.86022	0.000522836	0.00531315
cli-miR-126-3p	2.54554	6.85e-11	9.11e-09	cli-let-7g-3p	-2.06237	0.00483628	0.0145813	cli-let-7g-5p	-1.27366	0.00201635	0.0150577
cli-miR-130c-3p	-2.66633	4.37e-05	0.000918734	cli-let-7g-5p	-1.72777	1.88287e-05	9.81073e-05	cli-let-7i-5p	-2.0852	3.28691e-05	0.000588513
cli-miR-133a-3p	1.04478	0.002393	0.0187217	cli-let-7i-5p	-2.75657	1.70995e-09	2.05194e-08	cli-miR-103-3p	-1.94399	1.02877e-05	0.000294827
cli-miR-133c-3p	-1.07978	0.00778852	0.0470851	cli-miR-100-3p	-4.87343	7.15526e-07	4.97103e-06	cli-miR-106-3p	-3.02041	0.0044725	0.0271235
cli-miR-137a-3p	-12.3229	0.000347296	0.00461904	cli-miR-100-5p	-1.65525	1.48903e-05	7.96833e-05	cli-miR-106-5p	-2.05963	0.00747183	0.0413148
cli-miR-1388-3p	5.72591	3.23e-07	1.07e-05	cli-miR-103-3p	-2.79866	2.84758e-08	2.81911e-07	cli-miR-107-3p	-1.94443	1.09776e-05	0.000294827
cli-miR-1388-5p	4.3317	8.58e-05	0.00155617	cli-miR-106-3p	-6.04356	5.56109e-15	1.57299e-13	cli-miR-10b-5p	-1.51499	4.6683e-05	0.000797856
cli-miR-142-5p	1.69497	0.00166436	0.0161939	cli-miR-106-5p	-4.26073	2.35646e-11	3.73263e-10	cli-miR-126-3p	-1.96554	3.33555e-07	1.79167e-05
cli-miR-143-3p	1.1928	0.00392254	0.0279481	cli-miR-107-3p	-2.80066	2.3162e-07	1.91086e-06	cli-miR-128-3p	-1.1611	0.00874071	0.0462889
cli-miR-146a-3p	5.27444	2.39e-05	0.000571718	cli-miR-10a-5p	-1.20008	4.00532e-05	0.000195815	cli-miR-130a-3p	-1.18808	0.00540243	0.0315334
cli-miR-146a-5p	4.03723	2.77e-07	1e-05	cli-miR-10b-5p	-1.94232	3.11398e-07	2.41791e-06	cli-miR-130c-3p	-2.47669	0.000373766	0.00439176
cli-miR-146b-5p	2.06918	8.98e-05	0.00155798	cli-miR-125-3p	-1.45212	0.0140669	0.0345994	cli-miR-138-5p	-2.82614	0.0020424	0.0150577
cli-miR-148a-3p	-1.42032	2.98e-05	0.000661176	cli-miR-125-5p	-1.30273	0.000332886	0.00127983	cli-miR-142-5p	-1.3126	0.00130268	0.010648
cli-miR-148a-5p	-2.80155	0.000452101	0.00575382	cli-miR-128-3p	-2.47952	4.63974e-09	5.10371e-08	cli-miR-143-3p	-2.34574	4.0067e-09	3.7663e-07
cli-miR-15c-3p	-3.6996	0.000954843	0.0107122	cli-miR-128-5p	-3.67627	6.5285e-06	3.80189e-05	cli-miR-143-5p	-2.85593	0.0012956	0.010648
cli-miR-1805-3p	-8.77074	1.14e-08	7.58e-07	cli-miR-130a-3p	-1.61018	0.0017712	0.00589408	cli-miR-145-3p	-1.78018	0.00869483	0.0462889
cli-miR-1805-5p	-11.2228	0.000257885	0.00367486	cli-miR-130a-5p	-2.02754	0.0172204	0.0413291	cli-miR-145-5p	-2.02248	5.30223e-06	0.000166137
cli-miR-18b-3p	-2.80362	0.00682501	0.0439222	cli-miR-130c-3p	-5.14302	1.90456e-14	5.02805e-13	cli-miR-146a-5p	-2.21939	0.000103792	0.00143736
cli-miR-18b-5p	-2.54702	0.00192994	0.0171122	cli-miR-130c-5p	-4.77709	2.79782e-06	1.81629e-05	cli-miR-146b-5p	-1.34604	0.00372818	0.0233632
cli-miR-199-3p	-2.62185	7.2e-13	2.87e-10	cli-miR-133a-3p	1.6072	4.27353e-09	4.8352e-08	cli-miR-148a-3p	-1.24905	0.000835321	0.0076605
cli-miR-199-5p	-2.61448	4.05e-12	8.08e-10	cli-miR-138-5p	-4.24676	3.99043e-08	3.7624e-07	cli-miR-15a-5p	-1.2469	0.00445325	0.0271235
cli-miR-204-5p	2.53556	0.00715597	0.0453211	cli-miR-1388-3p	4.15669	8.22757e-06	4.72191e-05	cli-miR-15c-5p	-1.87203	8.94458e-05	0.00140132
cli-miR-205b-5p	-5.64969	3.79e-07	1.16e-05	cli-miR-1388-5p	2.54835	0.0104222	0.0275146	cli-miR-1662-5p	-2.27038	0.0025506	0.0177597
cli-miR-20b-5p	-2.16683	0.00237378	0.0187217	cli-miR-140-3p	-1.43544	0.000193268	0.000789013	cli-miR-16a-5p	-2.25097	6.79053e-07	3.19155e-05
cli-miR-210-3p	-3.06512	0.00127662	0.0134816	cli-miR-140-5p	-1.84848	0.00384087	0.0119762	cli-miR-16b-5p	-2.25158	4.57107e-06	0.000156248
cli-miR-214-3p	-2.01884	0.00523531	0.0354049	cli-miR-143-3p	-1.15293	0.00495161	0.0147431	cli-miR-17-5p	-1.54121	0.000542321	0.00536612
cli-miR-214-5p	-2.40618	0.00413152	0.0289206	cli-miR-143-5p	-1.92951	0.0170263	0.0411122	cli-miR-181a-5p	-2.43189	7.41357e-10	1.39375e-07
cli-miR-2188-5p	1.96916	0.00728927	0.045444	cli-miR-145-5p	-1.34463	0.0125317	0.0318112	cli-miR-181b-5p	-3.08749	1.85253e-09	2.32184e-07
cli-miR-22-3p	2.05708	6.82e-08	3.4e-06	cli-miR-1467-3p	-1.58826	0.00546521	0.0160313	cli-miR-184-3p	-4.29581	2.27708e-08	1.71236e-06
cli-miR-222a-3p	-2.34194	0.000966511	0.0107122	cli-miR-1467-5p	-2.01393	0.0145641	0.0353827	cli-miR-187-3p	3.55058	2.3392e-05	0.000517376
cli-miR-222a-5p	-2.4375	0.00770903	0.0470851	cli-miR-146a-5p	1.81783	0.00734145	0.0203302	cli-miR-187-5p	3.18553	0.00627331	0.0352055
cli-miR-26-5p	-1.09365	0.00178579	0.0161939	cli-miR-148a-3p	-2.66938	8.73344e-20	4.94063e-18	cli-miR-18b-5p	-4.24952	3.1072e-05	0.000584153
cli-miR-301b-3p	-3.79796	7.79e-09	6.21e-07	cli-miR-148a-5p	-3.71684	3.19728e-08	3.0881e-07	cli-miR-199-3p	-2.66147	8.88451e-11	3.34058e-08
cli-miR-301b-5p	-3.2797	0.00221665	0.0187038	cli-miR-1552-3p	-3.67467	1.29854e-05	7.14195e-05	cli-miR-199-5p	-2.18651	7.83627e-08	4.91073e-06
cli-miR-31-5p	-13.3359	6.42e-08	3.4e-06	cli-miR-1552-5p	-2.56545	0.00105332	0.0036589	cli-miR-19a-3p	-1.42209	0.00163882	0.0125755
cli-miR-363-3p	-2.10496	0.000323145	0.00444604	cli-miR-1559-5p	-1.86017	0.00143874	0.00486957	cli-miR-19b-3p	-1.39445	0.000942155	0.00843453
cli-miR-383-5p	-5.28952	1.08e-06	2.88e-05	cli-miR-15b-3p	-3.63015	0.0114945	0.0297504	cli-miR-204-5p	-3.84129	3.03298e-05	0.000584153
cli-miR-449d-5p	-10.1163	0.00838528	0.0484888	cli-miR-15c-3p	-5.35168	7.9181e-05	0.000352311	cli-miR-205b-5p	-9.94642	0.00295518	0.0197564
cli-miR-454-3p	-3.85492	6.58e-10	6.57e-08	cli-miR-15c-5p	-2.951	8.59285e-08	7.73357e-07	cli-miR-20a-5p	-1.41705	0.00138861	0.0111089
cli-miR-455-3p	-3.66009	0.000224048	0.00331093	cli-miR-1662-5p	-3.17689	2.15976e-07	1.81971e-06	cli-miR-20b-3p	-3.42584	0.0056814	0.0323668
cli-miR-455-5p	-4.27336	8.86e-08	3.93e-06	cli-miR-1677-3p	-4.66454	6.97825e-05	0.000325104	cli-miR-20b-5p	-2.86722	0.000104573	0.00143736
cli-miR-460a-3p	-2.73002	0.00347181	0.0252768	cli-miR-1677-5p	-5.18043	1.22361e-05	6.82466e-05	cli-miR-21-5p	-1.6894	1.9067e-05	0.000448074
cli-miR-460a-5p	-2.93188	0.00021321	0.00327196	cli-miR-16a-5p	-1.31363	0.000929341	0.00325681	cli-miR-26-3p	-3.6231	0.00158798	0.0124392
cli-miR-490-3p	-4.96963	2.44e-05	0.000571718	cli-miR-16b-3p	-6.15228	0.00127433	0.00438812	cli-miR-2970-3p	-1.98455	1.54597e-06	5.94364e-05
cli-miR-490-5p	-5.81436	0.00199509	0.0173053	cli-miR-16b-5p	-3.28927	1.9611e-08	2.04367e-07	cli-miR-29a-3p	2.28192	2.50874e-05	0.000524048
cli-miR-499-5p	-3.03416	6.54e-05	0.00130517	cli-miR-17-3p	-2.24169	0.00181334	0.00598404	cli-miR-29b-3p	2.40903	0.003082	0.0199798
cli-miR-92-3p	-1.45522	7.97e-05	0.00151456	cli-miR-17-5p	-2.38127	2.34813e-05	0.000117704	cli-miR-301a-3p	-2.05484	1.50851e-05	0.000378134
cli-miR-92-5p	-3.44238	0.0058382	0.0381876	cli-miR-1805-3p	-14.9671	5.51872e-13	1.28554e-11	cli-miR-301b-3p	-3.06739	5.85734e-05	0.000957548
cli-miR-9615-5p	-3.62654	0.00046146	0.00575382	cli-miR-1805-5p	-11.2228	0.000119997	0.00050552	cli-miR-363-3p	-2.70924	1.58075e-06	5.94364e-05
cli-miR-9621-5p	-3.20426	0.00294278	0.0221541	cli-miR-181a-3p	-2.54705	5.29486e-05	0.000252622	cli-miR-363-5p	-4.8215	0.000108499	0.00143736
conserve-cli-miR-12083-3p	-10.3627	0.00510838	0.0351421	cli-miR-181a-5p	-3.39138	7.91682e-33	7.83765e-31	cli-miR-454-3p	-2.61881	0.00011086	0.00143736
conserve-cli-miR-12094-5p	-14.5465	0.00128396	0.0134816	cli-miR-181b-3p	-2.41818	0.0189546	0.0444144	cli-miR-458-3p	-3.61133	0.000106191	0.00143736
conserve-cli-miR-1584-3p	10.7454	0.00147781	0.0151191	cli-miR-181b-5p	-4.29438	3.26966e-22	2.15797e-20	cli-miR-489-3p	-2.69024	0.00545126	0.0315334
conserve-cli-miR-2399-5p	-12.5785	7.2e-07	2.05e-05	cli-miR-184-3p	-4.62532	8.40794e-11	1.18912e-09	cli-miR-551a-5p	-3.29427	0.00855097	0.0462889
conserve-cli-miR-6077-5p	-12.9579	0.000128489	0.00210346	cli-miR-187-3p	3.68725	2.33404e-08	2.36995e-07	cli-miR-599-3p	-10.7171	0.000610819	0.00588892
conserve-cli-miR-6356-5p	-4.92926	0.00252125	0.0193458	cli-miR-187-5p	4.76044	0.000202375	0.0008095	cli-miR-875-5p	-3.82921	0.000672433	0.00632087
conserve-cli-miR-7115-3p	-4.79857	0.00176632	0.0161939	cli-miR-18a-3p	-4.0475	7.87443e-05	0.000352311	cli-miR-92-3p	-1.24003	0.00108759	0.00951013
conserve-cli-miR-7345b-3p	-10.1716	0.00837461	0.0484888	cli-miR-18a-5p	-4.98592	1.47849e-05	7.96833e-05	cli-miR-9615-5p	-10.1548	0.00222568	0.0160933
conserve-cli-miR-7398g-5p	-5.20201	0.00225903	0.0187038	cli-miR-18b-3p	-6.51982	2.90519e-06	1.85557e-05	conserve-cli-miR-146a-5p	-15.7123	0.000431723	0.00477434
conserve-cli-miR-9030-3p	-10.2127	0.0083413	0.0484888	cli-miR-18b-5p	-6.79654	5.03633e-18	1.81308e-16	conserve-cli-miR-1584-3p	-10.7454	0.000504658	0.00527087
novel-cli-miR-132-5p	10.3903	0.00175547	0.0161939	cli-miR-199-3p	-5.28333	1.47276e-52	5.83212e-50	conserve-cli-miR-2453-3p	12.1674	0.000359606	0.00439176
novel-cli-miR-144-3p	11.8389	0.00169367	0.0161939	cli-miR-199-5p	-4.80098	9.03167e-41	1.78827e-38	conserve-cli-miR-449b-3p	-10.2005	0.00322264	0.0205375
novel-cli-miR-18-3p	11.6363	0.00576259	0.0381876	cli-miR-19a-3p	-2.50252	5.74222e-06	3.39391e-05	conserve-cli-miR-458a-3p	-10.3182	0.00111475	0.00952606
novel-cli-miR-45-3p	-11.3826	0.000131796	0.00210346	cli-miR-19b-3p	-2.55679	1.24356e-07	1.09433e-06	novel-cli-miR-121-3p	-10.8324	0.000371076	0.00439176
novel-cli-miR-48-3p	15.6129	0.000826178	0.00969544	cli-miR-1a-3p	1.39726	0.00937218	0.0252475	novel-cli-miR-132-5p	-15.7123	0.000429079	0.00477434
novel-cli-miR-67-5p	-10.8968	0.00878438	0.0493657	cli-miR-205b-5p	-15.5961	2.87351e-15	8.75315e-14	novel-cli-miR-18-3p	-11.6363	0.00299498	0.0197564
novel-cli-miR-91-5p	-12.7468	1.45e-07	5.77e-06	cli-miR-20a-5p	-2.37268	1.7419e-05	9.19722e-05	novel-cli-miR-48-3p	-15.6129	0.000460686	0.00494909
				cli-miR-20b-3p	-5.54406	3.70225e-09	4.31204e-08
				cli-miR-20b-5p	-5.03404	1.78129e-15	5.87826e-14
				cli-miR-21-3p	-2.58654	0.000345015	0.00131371
				cli-miR-21-5p	-2.34977	8.07209e-09	8.63932e-08
				cli-miR-210-3p	-3.69741	3.43043e-06	2.15627e-05
				cli-miR-2131-3p	-2.44683	0.0020731	0.0067847
				cli-miR-2131-5p	-2.63288	0.000772479	0.00275587
				cli-miR-214-3p	-3.70134	1.11471e-09	1.42395e-08
				cli-miR-214-5p	-4.63395	7.99845e-12	1.37712e-10
				cli-miR-215-5p	-2.51676	0.00527188	0.0155796
				cli-miR-216b-5p	-9.77039	0.00986013	0.0262054
				cli-miR-217-5p	-9.98014	0.00959023	0.0256603
				cli-miR-218-5p	-3.49416	4.1093e-06	2.48065e-05
				cli-miR-22-3p	2.08656	2.02698e-11	3.34451e-10
				cli-miR-22-5p	1.94524	0.0129583	0.0326847
				cli-miR-221-3p	-2.46964	2.0949e-05	0.000107738
				cli-miR-221-5p	-3.79578	4.13441e-06	2.48065e-05
				cli-miR-222a-3p	-3.15424	1.95735e-07	1.68503e-06
				cli-miR-222a-5p	-3.17775	3.42078e-05	0.000169328
				cli-miR-26-3p	-5.80294	8.33294e-11	1.18912e-09
				cli-miR-2954-3p	-1.24795	0.00132311	0.00451682
				cli-miR-2954-5p	-2.07361	0.00717696	0.0200146
				cli-miR-2970-3p	-2.18082	8.7096e-06	4.92714e-05
				cli-miR-29a-3p	4.4025	4.86514e-12	9.17426e-11
				cli-miR-29a-5p	4.91073	0.0029552	0.0095143
				cli-miR-29b-3p	4.96183	1.66239e-09	2.05194e-08
				cli-miR-29b-5p	3.62449	0.00824596	0.02252
				cli-miR-301a-3p	-2.9356	5.62322e-07	4.12369e-06
				cli-miR-301b-3p	-6.86535	7.08476e-27	5.61113e-25
				cli-miR-301b-5p	-6.17278	2.61311e-06	1.72465e-05
				cli-miR-30c-5p	1.09203	0.000140025	0.000583685
				cli-miR-30d-3p	-2.25606	0.000110631	0.000471075
				cli-miR-31-5p	-13.3359	6.89623e-10	9.10302e-09
				cli-miR-33-3p	-2.31768	0.0118877	0.0305684
				cli-miR-363-3p	-4.8142	3.16923e-18	1.33565e-16
				cli-miR-363-5p	-6.88159	5.40059e-11	8.22552e-10
				cli-miR-375-3p	-2.04615	0.00573983	0.016713
				cli-miR-383-5p	-7.35338	1.60995e-13	3.98464e-12
				cli-miR-429-3p	-5.06228	0.00413546	0.0127941
				cli-miR-449d-5p	-10.1163	0.00580105	0.016768
				cli-miR-454-3p	-6.47373	9.94623e-39	1.3129e-36
				cli-miR-454-5p	-4.80409	4.06552e-06	2.48065e-05
				cli-miR-455-3p	-5.97722	2.60191e-12	5.7242e-11
				cli-miR-455-5p	-6.68137	3.37286e-18	1.33565e-16
				cli-miR-458-3p	-4.31232	6.80817e-07	4.81435e-06
				cli-miR-460a-3p	-4.74745	2.44424e-07	1.97535e-06
				cli-miR-460a-5p	-5.02549	5.56265e-12	1.00128e-10
				cli-miR-489-3p	-2.92919	0.000427297	0.00161152
				cli-miR-490-3p	-7.59641	1.12113e-10	1.53092e-09
				cli-miR-490-5p	-11.0108	0.000232449	0.0009205
				cli-miR-499-3p	-2.73795	0.00156386	0.0052482
				cli-miR-499-5p	-3.48946	3.38211e-07	2.5756e-06
				cli-miR-551b-3p	-2.21082	0.00351208	0.011038
				cli-miR-551b-5p	-3.2555	0.0187623	0.0442255
				cli-miR-599-3p	-11.0038	0.000256516	0.00100575
				cli-miR-875-5p	-5.01506	4.69175e-07	3.50553e-06
				cli-miR-9-3p	-1.98063	0.00715326	0.0200146
				cli-miR-9-5p	-3.56979	2.88717e-07	2.28664e-06
				cli-miR-92-3p	-2.69525	2.07465e-19	1.02695e-17
				cli-miR-92-5p	-4.25435	1.6216e-06	1.10716e-05
				cli-miR-9615-3p	-11.7963	2.14725e-05	0.000109014
				cli-miR-9615-5p	-13.7814	4.74854e-12	9.17426e-11
				cli-miR-9621-5p	-12.1011	2.17293e-06	1.45844e-05
				cli-miR-9623-5p	-10.7171	0.00686358	0.0194141
				cli-miR-99-5p	-1.26157	0.0207704	0.0483828
				conserve-cli-miR-12083-3p	-10.3627	0.00343311	0.0108761
				conserve-cli-miR-12094-5p	-14.5465	0.000748035	0.00269292
				conserve-cli-miR-12250-3p	-6.11374	0.0175541	0.041876
				conserve-cli-miR-12255-3p	-5.25563	0.00010806	0.000465129
				conserve-cli-miR-12388-3p	-9.59495	0.0178217	0.0422598
				conserve-cli-miR-143-3p	-11.52	0.0145377	0.0353827
				conserve-cli-miR-146a-5p	-14.8572	0.00074546	0.00269292
				conserve-cli-miR-148a-1-3p	-2.10513	0.00637525	0.0182942
				conserve-cli-miR-148a-1-5p	-2.84098	0.000285679	0.0011091
				conserve-cli-miR-1671-3p	9.58871	0.013283	0.0330192
				conserve-cli-miR-1671-5p	10.6677	0.000601121	0.00222471
				conserve-cli-miR-1843-3p	-9.81911	0.010818	0.0283703
				conserve-cli-miR-2399-5p	-12.5785	6.04329e-07	4.35117e-06
				conserve-cli-miR-2453-3p	12.1674	0.000552747	0.00206498
				conserve-cli-miR-458a-3p	-11.9317	7.61606e-05	0.000349991
				conserve-cli-miR-458a-5p	-10.4443	0.00928177	0.0251752
				conserve-cli-miR-5589-3p	-11.6104	0.0124912	0.0318112
				conserve-cli-miR-6077-5p	-12.9579	6.56004e-05	0.000309259
				conserve-cli-miR-6356-5p	-13.2512	7.36915e-08	6.78647e-07
				conserve-cli-miR-6542-3p	-13.0402	4.60092e-05	0.000222191
				conserve-cli-miR-6690-3p	-4.31892	0.000789899	0.00279286
				conserve-cli-miR-6690-5p	-2.82348	0.00015304	0.000631288
				conserve-cli-miR-7115-3p	-14.1794	3.40078e-12	7.08795e-11
				conserve-cli-miR-7345b-3p	-10.1716	0.00650643	0.0185363
				conserve-cli-miR-7398g-5p	-11.3313	0.000106503	0.000463463
				conserve-cli-miR-9307-5p	-9.61961	0.0133411	0.0330192
				novel-cli-miR-12-3p	-10.5918	0.0209163	0.0484376
				novel-cli-miR-122-3p	-10.6348	0.0110636	0.0288236
				novel-cli-miR-144-3p	11.0108	0.00486044	0.0145813
				novel-cli-miR-4-3p	-9.78681	0.0132085	0.0330192
				novel-cli-miR-45-3p	-11.3826	7.6892e-05	0.000349991
				novel-cli-miR-67-5p	-10.8968	0.00485337	0.0145813
				novel-cli-miR-91-5p	-4.61751	0.000650708	0.00238593
