# Supplementary material for: Identification and expression pattern analysis of miRNAs in pectoral muscle during pigeon (Columba livia) development
Source: PeerJ. 2021 Jun 23;9:e11438. doi: 10.7717/peerj.11438 (PMC8234919; doi:10.7717/peerj.11438)
Supplement: Supplemental Information 8 [file peerj-09-11438-s008.xlsx]

## Sheet: Go
Function enrichment analysis for target genes of 16 overlapped DE miRNAs between different age stages.
ID	Description	GeneRatio	BgRatio	pvalue	p.adjust	qvalue	geneID	Count
GO:0048523	negative regulation of cellular process	95/261	493/2052	1.02448e-06	0.00010064	8.22755e-05	RGS17/ITM2B/NFIA/USP28/NF1/SOX11/PER2/TGIF1/GATA2/RAP1B/PTPRJ/NFIB/PRKAR1A/RBPMS2/SMAD6/CBFA2T3/EN2/GATA6/INSIG1/CDC42/SEMA3A/HOXC8/TBX3/JARID2/CACNA1C/RIMBP2/ZFHX4/EPHA4/BRMS1L/TAOK3/RGMA/MAPRE1/CNOT7/APCDD1/NPAS2/CCND1/RAB33B/PAFAH1B1/FAM60A/SKI/RARB/NTRK3/THRB/EPHA7/CRIM1/BMP2/EYA1/RBM24/KLHL20/KIT/RREB1/FOXP1/HDAC9/NOG/PDS5B/CHD7/YAP1/ZEB1/ZNF706/BMPR1B/FZD4/MAFK/MTMR2/NR2F2/HSPA5/PODXL/CAV1/…	95
GO:2000112	regulation of cellular macromolecule biosynthetic process	94/261	465/2052	9.80287e-08	2.63331e-05	2.15279e-05	ITM2B/NFIA/SOX11/PER2/TGIF1/CCNL2/GATA2/CCNC/EIF4G2/NFIB/PAX9/RBPMS2/DYRK2/SMAD6/CBFA2T3/HIF1A/EN2/GATA6/INSIG1/NFYB/ARID5B/HOXA11/HOXC8/SSBP3/TBX3/JARID2/HOXD10/ZFHX4/BRMS1L/VSX1/RGMA/CNOT7/NPAS2/CCND1/CLOCK/MYCN/SPTY2D1/SKI/RARB/PLAG1/THRB/BMP2/RBM24/ESR1/IRF2/USP7/TBPL1/ASXL2/KIT/RREB1/FOXP1/HDAC9/NOG/QKI/ACVR2A/CHD7/FOS/YAP1/ZEB1/ZNF706/BMPR1B/ETS1/FZD4/MAFK/MEF2A/MYB/NR2F2/PHF20L1/ETS2/GLI3/…	94
GO:0010556	regulation of macromolecule biosynthetic process	94/261	474/2052	2.74588e-07	3.60911e-05	2.95053e-05	ITM2B/NFIA/SOX11/PER2/TGIF1/CCNL2/GATA2/CCNC/EIF4G2/NFIB/PAX9/RBPMS2/DYRK2/SMAD6/CBFA2T3/HIF1A/EN2/GATA6/INSIG1/NFYB/ARID5B/HOXA11/HOXC8/SSBP3/TBX3/JARID2/HOXD10/ZFHX4/BRMS1L/VSX1/RGMA/CNOT7/NPAS2/CCND1/CLOCK/MYCN/SPTY2D1/SKI/RARB/PLAG1/THRB/BMP2/RBM24/ESR1/IRF2/USP7/TBPL1/ASXL2/KIT/RREB1/FOXP1/HDAC9/NOG/QKI/ACVR2A/CHD7/FOS/YAP1/ZEB1/ZNF706/BMPR1B/ETS1/FZD4/MAFK/MEF2A/MYB/NR2F2/PHF20L1/ETS2/GLI3/…	94
GO:0031326	regulation of cellular biosynthetic process	94/261	490/2052	1.52628e-06	0.000141605	0.000115765	ITM2B/NFIA/SOX11/PER2/TGIF1/CCNL2/GATA2/CCNC/EIF4G2/NFIB/PAX9/RBPMS2/DYRK2/SMAD6/CBFA2T3/HIF1A/EN2/GATA6/INSIG1/NFYB/ARID5B/HOXA11/HOXC8/SSBP3/TBX3/JARID2/HOXD10/ZFHX4/BRMS1L/VSX1/RGMA/CNOT7/NPAS2/CCND1/CLOCK/MYCN/SPTY2D1/SKI/RARB/PLAG1/THRB/BMP2/RBM24/ESR1/IRF2/USP7/TBPL1/ASXL2/KIT/RREB1/FOXP1/HDAC9/NOG/QKI/ACVR2A/CHD7/FOS/YAP1/ZEB1/ZNF706/BMPR1B/ETS1/FZD4/MAFK/MEF2A/MYB/NR2F2/PHF20L1/ETS2/GLI3/…	94
GO:0009889	regulation of biosynthetic process	94/261	494/2052	2.29195e-06	0.000182264	0.000149005	ITM2B/NFIA/SOX11/PER2/TGIF1/CCNL2/GATA2/CCNC/EIF4G2/NFIB/PAX9/RBPMS2/DYRK2/SMAD6/CBFA2T3/HIF1A/EN2/GATA6/INSIG1/NFYB/ARID5B/HOXA11/HOXC8/SSBP3/TBX3/JARID2/HOXD10/ZFHX4/BRMS1L/VSX1/RGMA/CNOT7/NPAS2/CCND1/CLOCK/MYCN/SPTY2D1/SKI/RARB/PLAG1/THRB/BMP2/RBM24/ESR1/IRF2/USP7/TBPL1/ASXL2/KIT/RREB1/FOXP1/HDAC9/NOG/QKI/ACVR2A/CHD7/FOS/YAP1/ZEB1/ZNF706/BMPR1B/ETS1/FZD4/MAFK/MEF2A/MYB/NR2F2/PHF20L1/ETS2/GLI3/…	94
GO:0019219	regulation of nucleobase-containing compound metabolic process	92/261	471/2052	8.70235e-07	9.08308e-05	7.42562e-05	NFIA/SOX11/PER2/TGIF1/CCNL2/GATA2/CCNC/NFIB/PAX9/RBPMS2/SMAD6/CBFA2T3/HIF1A/EN2/GATA6/INSIG1/NFYB/ARID5B/HOXA11/HOXC8/SSBP3/TBX3/JARID2/HOXD10/ZFHX4/BRMS1L/VSX1/RGMA/CNOT7/NPAS2/CCND1/CLOCK/MYCN/SPTY2D1/SKI/RARB/PLAG1/THRB/BMP2/EYA1/RBM24/ESR1/IRF2/USP7/TBPL1/MBNL1/ASXL2/KIT/RREB1/FOXP1/HDAC9/NOG/ACVR2A/CHD7/FOS/YAP1/ZEB1/ZNF706/BMPR1B/ETS1/FZD4/MAFK/MEF2A/MYB/NR2F2/PHF20L1/ETS2/GLI3/LBH/MAF/TARD…	92
GO:0051252	regulation of RNA metabolic process	91/261	445/2052	9.81438e-08	2.63331e-05	2.15279e-05	NFIA/SOX11/PER2/TGIF1/CCNL2/GATA2/CCNC/NFIB/PAX9/RBPMS2/SMAD6/CBFA2T3/HIF1A/EN2/GATA6/INSIG1/NFYB/ARID5B/HOXA11/HOXC8/SSBP3/TBX3/JARID2/HOXD10/ZFHX4/BRMS1L/VSX1/RGMA/CNOT7/NPAS2/CCND1/CLOCK/MYCN/SPTY2D1/SKI/RARB/PLAG1/THRB/BMP2/RBM24/ESR1/IRF2/USP7/TBPL1/MBNL1/ASXL2/KIT/RREB1/FOXP1/HDAC9/NOG/ACVR2A/CHD7/FOS/YAP1/ZEB1/ZNF706/BMPR1B/ETS1/FZD4/MAFK/MEF2A/MYB/NR2F2/PHF20L1/ETS2/GLI3/LBH/MAF/TARDBP/SP…	91
GO:0034654	nucleobase-containing compound biosynthetic process	90/261	488/2052	1.82708e-05	0.000953506	0.000779513	NFIA/SOX11/PER2/TGIF1/CCNL2/GATA2/CCNC/NFIB/PAX9/RBPMS2/SMAD6/CBFA2T3/HIF1A/EN2/GATA6/INSIG1/NFYB/ARID5B/HOXA11/HOXC8/SSBP3/TBX3/JARID2/HOXD10/ZFHX4/BRMS1L/VSX1/RGMA/CNOT7/NPAS2/CCND1/CLOCK/MYCN/SPTY2D1/CMPK1/SKI/RARB/PLAG1/THRB/BMP2/ESR1/IRF2/USP7/TBPL1/ASXL2/KIT/RREB1/FOXP1/HDAC9/NOG/ACVR2A/CHD7/FOS/YAP1/ZEB1/ZNF706/BMPR1B/ETS1/FZD4/MAFK/MEF2A/MYB/NR2F2/PBRM1/PHF20L1/ETS2/GLI3/LBH/MAF/SP3/SETD3…	90
GO:0018130	heterocycle biosynthetic process	90/261	500/2052	5.26657e-05	0.00231452	0.00189217	NFIA/SOX11/PER2/TGIF1/CCNL2/GATA2/CCNC/NFIB/PAX9/RBPMS2/SMAD6/CBFA2T3/HIF1A/EN2/GATA6/INSIG1/NFYB/ARID5B/HOXA11/HOXC8/SSBP3/TBX3/JARID2/HOXD10/ZFHX4/BRMS1L/VSX1/RGMA/CNOT7/NPAS2/CCND1/CLOCK/MYCN/SPTY2D1/CMPK1/SKI/RARB/PLAG1/THRB/BMP2/ESR1/IRF2/USP7/TBPL1/ASXL2/KIT/RREB1/FOXP1/HDAC9/NOG/ACVR2A/CHD7/FOS/YAP1/ZEB1/ZNF706/BMPR1B/ETS1/FZD4/MAFK/MEF2A/MYB/NR2F2/PBRM1/PHF20L1/ETS2/GLI3/LBH/MAF/SP3/SETD3…	90
GO:0006351	transcription, DNA-templated	87/261	422/2052	1.48508e-07	3.1001e-05	2.53441e-05	NFIA/SOX11/PER2/TGIF1/CCNL2/GATA2/CCNC/NFIB/PAX9/RBPMS2/SMAD6/CBFA2T3/HIF1A/EN2/GATA6/INSIG1/NFYB/ARID5B/HOXA11/HOXC8/SSBP3/TBX3/JARID2/HOXD10/ZFHX4/BRMS1L/VSX1/RGMA/CNOT7/NPAS2/CCND1/CLOCK/MYCN/SPTY2D1/SKI/RARB/PLAG1/THRB/BMP2/ESR1/IRF2/USP7/TBPL1/ASXL2/KIT/RREB1/FOXP1/HDAC9/NOG/ACVR2A/CHD7/FOS/YAP1/ZEB1/ZNF706/BMPR1B/ETS1/FZD4/MAFK/MEF2A/MYB/NR2F2/PBRM1/PHF20L1/ETS2/GLI3/LBH/MAF/SP3/SETD3/SP8/G…	87
GO:0032774	RNA biosynthetic process	87/261	428/2052	3.0256e-07	3.60911e-05	2.95053e-05	NFIA/SOX11/PER2/TGIF1/CCNL2/GATA2/CCNC/NFIB/PAX9/RBPMS2/SMAD6/CBFA2T3/HIF1A/EN2/GATA6/INSIG1/NFYB/ARID5B/HOXA11/HOXC8/SSBP3/TBX3/JARID2/HOXD10/ZFHX4/BRMS1L/VSX1/RGMA/CNOT7/NPAS2/CCND1/CLOCK/MYCN/SPTY2D1/SKI/RARB/PLAG1/THRB/BMP2/ESR1/IRF2/USP7/TBPL1/ASXL2/KIT/RREB1/FOXP1/HDAC9/NOG/ACVR2A/CHD7/FOS/YAP1/ZEB1/ZNF706/BMPR1B/ETS1/FZD4/MAFK/MEF2A/MYB/NR2F2/PBRM1/PHF20L1/ETS2/GLI3/LBH/MAF/SP3/SETD3/SP8/G…	87
GO:0097659	nucleic acid-templated transcription	87/261	428/2052	3.0256e-07	3.60911e-05	2.95053e-05	NFIA/SOX11/PER2/TGIF1/CCNL2/GATA2/CCNC/NFIB/PAX9/RBPMS2/SMAD6/CBFA2T3/HIF1A/EN2/GATA6/INSIG1/NFYB/ARID5B/HOXA11/HOXC8/SSBP3/TBX3/JARID2/HOXD10/ZFHX4/BRMS1L/VSX1/RGMA/CNOT7/NPAS2/CCND1/CLOCK/MYCN/SPTY2D1/SKI/RARB/PLAG1/THRB/BMP2/ESR1/IRF2/USP7/TBPL1/ASXL2/KIT/RREB1/FOXP1/HDAC9/NOG/ACVR2A/CHD7/FOS/YAP1/ZEB1/ZNF706/BMPR1B/ETS1/FZD4/MAFK/MEF2A/MYB/NR2F2/PBRM1/PHF20L1/ETS2/GLI3/LBH/MAF/SP3/SETD3/SP8/G…	87
GO:0048869	cellular developmental process	87/261	484/2052	8.04809e-05	0.00312565	0.00255529	PLEKHB2/SOX11/GATA2/FARP1/NFIB/PRKAR1A/RBPMS2/SYT1/SMAD6/CBFA2T3/EN2/GATA6/ALDH1A2/INSIG1/CDC42/SEMA3A/HAS2/HOXA11/HOXC8/VCL/GAP43/TBX3/JARID2/MYH9/NRP1/EPHA4/TGFBR2/VSX1/RGMA/PDGFRA/PAFAH1B1/FAM60A/SKI/DPYSL2/FGF4/RARB/NTRK3/VEGFA/THRB/EPHA7/EPHA5/BMP2/YES1/RBM24/TBPL1/KIT/ALCAM/ACVR2B/FOXP1/HDAC9/NOG/FN1/QKI/FLRT3/ACVR2A/CHD7/FOS/ZEB1/BMPR1B/ETS1/FZD4/MEF2A/MTMR2/NR2F2/ETS2/CAV1/PHACTR4/MAF/BCL…	87
GO:0006355	regulation of transcription, DNA-templated	86/261	413/2052	1.10378e-07	2.63331e-05	2.15279e-05	NFIA/SOX11/PER2/TGIF1/CCNL2/GATA2/CCNC/NFIB/PAX9/RBPMS2/SMAD6/CBFA2T3/HIF1A/EN2/GATA6/INSIG1/NFYB/ARID5B/HOXA11/HOXC8/SSBP3/TBX3/JARID2/HOXD10/ZFHX4/BRMS1L/VSX1/RGMA/CNOT7/NPAS2/CCND1/CLOCK/MYCN/SPTY2D1/SKI/RARB/PLAG1/THRB/BMP2/ESR1/IRF2/USP7/TBPL1/ASXL2/KIT/RREB1/FOXP1/HDAC9/NOG/ACVR2A/CHD7/FOS/YAP1/ZEB1/ZNF706/BMPR1B/ETS1/FZD4/MAFK/MEF2A/MYB/NR2F2/PHF20L1/ETS2/GLI3/LBH/MAF/SP3/SETD3/SP8/GATA3/M…	86
GO:1903506	regulation of nucleic acid-templated transcription	86/261	419/2052	2.28283e-07	3.60911e-05	2.95053e-05	NFIA/SOX11/PER2/TGIF1/CCNL2/GATA2/CCNC/NFIB/PAX9/RBPMS2/SMAD6/CBFA2T3/HIF1A/EN2/GATA6/INSIG1/NFYB/ARID5B/HOXA11/HOXC8/SSBP3/TBX3/JARID2/HOXD10/ZFHX4/BRMS1L/VSX1/RGMA/CNOT7/NPAS2/CCND1/CLOCK/MYCN/SPTY2D1/SKI/RARB/PLAG1/THRB/BMP2/ESR1/IRF2/USP7/TBPL1/ASXL2/KIT/RREB1/FOXP1/HDAC9/NOG/ACVR2A/CHD7/FOS/YAP1/ZEB1/ZNF706/BMPR1B/ETS1/FZD4/MAFK/MEF2A/MYB/NR2F2/PHF20L1/ETS2/GLI3/LBH/MAF/SP3/SETD3/SP8/GATA3/M…	86
GO:2001141	regulation of RNA biosynthetic process	86/261	419/2052	2.28283e-07	3.60911e-05	2.95053e-05	NFIA/SOX11/PER2/TGIF1/CCNL2/GATA2/CCNC/NFIB/PAX9/RBPMS2/SMAD6/CBFA2T3/HIF1A/EN2/GATA6/INSIG1/NFYB/ARID5B/HOXA11/HOXC8/SSBP3/TBX3/JARID2/HOXD10/ZFHX4/BRMS1L/VSX1/RGMA/CNOT7/NPAS2/CCND1/CLOCK/MYCN/SPTY2D1/SKI/RARB/PLAG1/THRB/BMP2/ESR1/IRF2/USP7/TBPL1/ASXL2/KIT/RREB1/FOXP1/HDAC9/NOG/ACVR2A/CHD7/FOS/YAP1/ZEB1/ZNF706/BMPR1B/ETS1/FZD4/MAFK/MEF2A/MYB/NR2F2/PHF20L1/ETS2/GLI3/LBH/MAF/SP3/SETD3/SP8/GATA3/M…	86
GO:0030154	cell differentiation	86/261	461/2052	1.93848e-05	0.000980988	0.00080198	PLEKHB2/SOX11/GATA2/FARP1/NFIB/PRKAR1A/RBPMS2/SYT1/SMAD6/CBFA2T3/EN2/GATA6/ALDH1A2/INSIG1/CDC42/SEMA3A/HAS2/HOXA11/HOXC8/VCL/GAP43/TBX3/JARID2/MYH9/NRP1/EPHA4/TGFBR2/VSX1/RGMA/PDGFRA/PAFAH1B1/FAM60A/SKI/DPYSL2/FGF4/RARB/NTRK3/VEGFA/THRB/EPHA7/EPHA5/BMP2/YES1/RBM24/TBPL1/KIT/ALCAM/ACVR2B/FOXP1/HDAC9/NOG/QKI/FLRT3/ACVR2A/CHD7/FOS/ZEB1/BMPR1B/ETS1/FZD4/MEF2A/MTMR2/NR2F2/ETS2/CAV1/PHACTR4/MAF/BCL2/SP…	86
GO:0009653	anatomical structure morphogenesis	76/261	337/2052	2.2074e-08	1.72196e-05	1.40774e-05	GATA2/FARP1/NFIB/PRKAR1A/PAX9/RBPMS2/HAND2/EN2/GATA6/ALDH1A2/INSIG1/CDC42/SEMA3A/HAS2/HOXA11/HOXC8/VCL/GAP43/TBX3/SOBP/MYH9/NRP1/EPHA4/TGFBR2/HSPA8/RAB33B/PDGFRA/NBL1/PAFAH1B1/DPYSL2/RARB/THBS2/NTRK3/VEGFA/THRB/EPHA7/EPHA5/BMP2/TBPL1/ASXL2/KIT/ALCAM/ACVR2B/FOXP1/FN1/FLRT3/ACVR2A/CHD7/BMPR1B/ETS1/FZD4/MTMR2/NR2F2/TSPAN12/PODXL/ETS2/SAT1/PHACTR4/BCL2/SP3/SP8/PDGFC/GATA3/IGF1/ACVR1/BTG1/HOXA3/NEUROD…	76
GO:0048513	animal organ development	75/261	373/2052	4.72317e-06	0.000334812	0.000273716	GATA2/NFIB/PRKAR1A/PAX9/RBPMS2/SMAD6/EN2/GATA6/ALDH1A2/INSIG1/SEMA3A/HAS2/ARID5B/HOXA11/HOXC8/TBX3/SOBP/MYH9/NRP1/EPHA4/VLDLR/TGFBR2/HSPA8/RAB33B/PDGFRA/NBL1/PAFAH1B1/DPYSL2/RARB/NTRK3/VEGFA/THRB/EPHA7/EPHA5/BMP2/RBM24/ASXL2/KIT/ACVR2B/FOXP1/HDAC9/NOG/FLRT3/ACVR2A/CHD7/FOS/BMPR1B/FZD4/GJA1/NR2F2/TSPAN12/MAB21L1/ETS2/PHACTR4/GLI3/MAF/BCL2/SP3/PDGFC/GATA3/TAPT1/IGF1/ACVR1/LRP8/INHBB/HOXA3/NEUROD1/H…	75
GO:0009893	positive regulation of metabolic process	73/261	400/2052	0.00024115	0.00706528	0.00577603	NFIA/SOX11/GATA2/CCNC/PPP1R12A/NFIB/RBPMS2/DYRK2/HIF1A/EN2/GATA6/ALDH1A2/INSIG1/CDC42/NFYB/ARID5B/HOXA11/SSBP3/TBX3/JARID2/ZFHX4/EPHA4/TAOK3/TGFBR2/CNOT7/NPAS2/CCND1/PDGFRA/MYCN/RARB/NTRK3/VEGFA/THRB/EPHA7/BMP2/EYA1/RBM24/ESR1/IRF2/TBPL1/STK4/ASXL2/KIT/RREB1/FOXP1/ACVR2A/CHD7/FOS/YAP1/FZD4/MEF2A/MYB/NR2F2/MAF/TARDBP/BCL2/SP3/SETD3/PDGFC/GATA3/VIP/MYBL1/IGF1/ACVR1/HPRT1/INHBB/HOXA3/HOXB3/MAFB/HOXA…	73
GO:0010604	positive regulation of macromolecule metabolic process	72/261	376/2052	5.06424e-05	0.00228575	0.00186865	NFIA/SOX11/GATA2/CCNC/PPP1R12A/NFIB/RBPMS2/DYRK2/HIF1A/EN2/GATA6/ALDH1A2/INSIG1/CDC42/NFYB/ARID5B/HOXA11/SSBP3/TBX3/JARID2/ZFHX4/EPHA4/TAOK3/TGFBR2/CNOT7/NPAS2/CCND1/PDGFRA/MYCN/RARB/NTRK3/VEGFA/THRB/EPHA7/BMP2/EYA1/RBM24/ESR1/IRF2/TBPL1/STK4/ASXL2/KIT/RREB1/FOXP1/ACVR2A/CHD7/FOS/YAP1/FZD4/MEF2A/MYB/NR2F2/MAF/TARDBP/BCL2/SP3/SETD3/PDGFC/GATA3/VIP/MYBL1/IGF1/ACVR1/INHBB/HOXA3/HOXB3/MAFB/HOXA5/MAFG…	72
GO:0006796	phosphate-containing compound metabolic process	68/261	350/2052	5.4227e-05	0.00232203	0.00189831	CCNL2/CCNC/PPP1R12A/PTPRJ/PRKAR1A/RBPMS2/DYRK2/SMAD6/EN2/GATA6/CDC42/MBOAT2/PI4K2B/RIMBP2/EPHA4/TAOK3/TGFBR2/RPS6KA5/RCAN3/CNOT7/MAGI3/CCND1/PDGFRA/PAFAH1B1/CSNK1G1/PIP4K2A/CMPK1/CCND2/SHOC2/NTRK3/VEGFA/EPHA7/CTDSPL2/EPHA5/BMP2/YES1/RAN/EYA1/TBPL1/STK4/KIT/ACVR2B/AFAP1/PIP5K1B/ACVR2A/YAP1/BMPR1B/FZD4/MTMR2/NR2F2/CAV1/PHACTR4/ATP6V1A/FAR1/BCL2/CAMK2D/PDGFC/UBLCP1/TIMP3/IGF1/ACVR1/PTPRG/HPRT1/INHBB…	68
GO:0006793	phosphorus metabolic process	68/261	351/2052	5.98826e-05	0.0025001	0.00204389	CCNL2/CCNC/PPP1R12A/PTPRJ/PRKAR1A/RBPMS2/DYRK2/SMAD6/EN2/GATA6/CDC42/MBOAT2/PI4K2B/RIMBP2/EPHA4/TAOK3/TGFBR2/RPS6KA5/RCAN3/CNOT7/MAGI3/CCND1/PDGFRA/PAFAH1B1/CSNK1G1/PIP4K2A/CMPK1/CCND2/SHOC2/NTRK3/VEGFA/EPHA7/CTDSPL2/EPHA5/BMP2/YES1/RAN/EYA1/TBPL1/STK4/KIT/ACVR2B/AFAP1/PIP5K1B/ACVR2A/YAP1/BMPR1B/FZD4/MTMR2/NR2F2/CAV1/PHACTR4/ATP6V1A/FAR1/BCL2/CAMK2D/PDGFC/UBLCP1/TIMP3/IGF1/ACVR1/PTPRG/HPRT1/INHBB…	68
GO:0006366	transcription by RNA polymerase II	60/261	279/2052	6.27716e-06	0.000416591	0.000340573	NFIA/SOX11/PER2/CCNL2/GATA2/CCNC/NFIB/RBPMS2/HIF1A/EN2/GATA6/INSIG1/ARID5B/HOXC8/SSBP3/TBX3/ZFHX4/BRMS1L/RGMA/CNOT7/CCND1/MYCN/SKI/RARB/THRB/BMP2/IRF2/TBPL1/ASXL2/RREB1/FOXP1/HDAC9/NOG/ACVR2A/CHD7/FOS/YAP1/BMPR1B/ETS1/MAFK/MEF2A/NR2F2/PBRM1/ETS2/MAF/SP3/SETD3/SP8/GATA3/IGF1/MIER1/ACVR1/INHBB/HOXA3/HOXB3/MAFB/HOXA5/MAFG/LCORL/H2AFY	60
GO:0006357	regulation of transcription by RNA polymerase II	59/261	273/2052	6.48585e-06	0.000416591	0.000340573	NFIA/SOX11/PER2/CCNL2/GATA2/CCNC/NFIB/RBPMS2/HIF1A/EN2/GATA6/INSIG1/ARID5B/HOXC8/SSBP3/TBX3/ZFHX4/BRMS1L/RGMA/CNOT7/CCND1/MYCN/SKI/RARB/THRB/BMP2/IRF2/TBPL1/ASXL2/RREB1/FOXP1/HDAC9/NOG/ACVR2A/CHD7/FOS/YAP1/BMPR1B/ETS1/MAFK/MEF2A/NR2F2/ETS2/MAF/SP3/SETD3/SP8/GATA3/IGF1/MIER1/ACVR1/INHBB/HOXA3/HOXB3/MAFB/HOXA5/MAFG/LCORL/H2AFY	59
GO:0009892	negative regulation of metabolic process	59/261	304/2052	0.000205715	0.00624626	0.00510646	ITM2B/NFIA/SOX11/PER2/TGIF1/GATA2/PTPRJ/NFIB/PRKAR1A/SMAD6/CBFA2T3/GATA6/INSIG1/HOXC8/TBX3/JARID2/RIMBP2/ZFHX4/EPHA4/BRMS1L/TAOK3/CNOT7/CCND1/PAFAH1B1/RARB/NTRK3/THRB/CRIM1/BMP2/RBM24/DICER1/RREB1/FOXP1/HDAC9/LIN28B/YAP1/ZEB1/ZNF706/MAFK/NR2F2/CAV1/GLI3/MAF/TARDBP/BCL2/IREB2/SP3/TIMP3/TNFAIP8/GATA3/VIP/IGF1/MIER1/INHBB/CHMP4B/HOXB3/COL6A3/H2AFY/YWHAB	59
GO:0050793	regulation of developmental process	57/261	251/2052	1.78199e-06	0.000156627	0.000128047	PLEKHB2/RAB14/GATA2/NFIB/RBPMS2/SMAD6/GATA6/INSIG1/CDC42/SEMA3A/HOXA11/TBX3/MYH9/EPHA4/TGFBR2/RGMA/PAFAH1B1/FAM60A/SKI/DPYSL2/RARB/THBS2/NTRK3/VEGFA/EPHA7/BMP2/RBM24/KIT/FOXP1/HDAC9/NOG/FN1/FLRT3/ACVR2A/CHD7/FOS/ZEB1/ZNF706/BMPR1B/ETS1/FZD4/MTMR2/TSPAN12/MAF/BCL2/GATA3/TAPT1/DDX6/IGF1/ACVR1/BTG1/SNAP25/NEUROD1/MAFB/HOXA5/MAFG/H2AFY	57
GO:0031324	negative regulation of cellular metabolic process	57/261	280/2052	6.61197e-05	0.00262904	0.0021493	ITM2B/NFIA/SOX11/PER2/TGIF1/GATA2/PTPRJ/NFIB/PRKAR1A/SMAD6/CBFA2T3/GATA6/INSIG1/HOXC8/TBX3/JARID2/RIMBP2/ZFHX4/EPHA4/BRMS1L/TAOK3/CNOT7/CCND1/PAFAH1B1/RARB/NTRK3/THRB/CRIM1/BMP2/RBM24/RREB1/FOXP1/HDAC9/YAP1/ZEB1/ZNF706/MAFK/NR2F2/CAV1/GLI3/MAF/TARDBP/BCL2/IREB2/SP3/TIMP3/TNFAIP8/GATA3/VIP/IGF1/MIER1/INHBB/CHMP4B/HOXB3/COL6A3/H2AFY/YWHAB	57
GO:0051239	regulation of multicellular organismal process	56/261	279/2052	0.000118829	0.00428568	0.00350365	RAB14/GATA2/NFIB/CHRM2/SMAD6/GATA6/SEMA3A/HOXA11/CACNA1C/EPHA4/TGFBR2/RGMA/PAFAH1B1/DPYSL2/RARB/THBS2/NTRK3/VEGFA/EPHA7/BMP2/RBM24/KIT/ACVR2B/FOXP1/HDAC9/NOG/FLRT3/ACVR2A/CHD7/FOS/ZEB1/ZNF706/BMPR1B/ETS1/FZD4/MTMR2/NR2F2/TSPAN12/MAF/BCL2/PDGFC/GATA3/TAPT1/DDX6/VIP/IGF1/ACVR1/BTG1/INHBB/SNAP25/NEUROD1/MAFB/HOXA5/MAFG/H2AFY/ITGAV	56
GO:0010628	positive regulation of gene expression	54/261	258/2052	4.77985e-05	0.00221732	0.00181271	NFIA/SOX11/GATA2/CCNC/NFIB/HIF1A/EN2/GATA6/ALDH1A2/INSIG1/NFYB/HOXA11/SSBP3/TBX3/ZFHX4/TGFBR2/CNOT7/NPAS2/MYCN/RARB/NTRK3/THRB/RBM24/ESR1/IRF2/TBPL1/ASXL2/KIT/RREB1/FOXP1/ACVR2A/CHD7/FOS/YAP1/FZD4/MEF2A/MYB/NR2F2/MAF/TARDBP/SP3/SETD3/GATA3/VIP/MYBL1/IGF1/ACVR1/HOXA3/HOXB3/MAFB/HOXA5/MAFG/H2AFY/GLI2	54
GO:0009888	tissue development	53/261	230/2052	2.80308e-06	0.000212779	0.000173952	NFIB/PRKAR1A/SMAD6/GATA6/ALDH1A2/CDC42/SEMA3A/HAS2/ARID5B/HOXA11/VCL/GAP43/TBX3/NRP1/EPHA4/TGFBR2/PAFAH1B1/RARB/NTRK3/VEGFA/THRB/EPHA7/BMP2/EYA1/RBM24/ACVR2B/FOXP1/HDAC9/NOG/FLRT3/ACVR2A/CHD7/FOS/BMPR1B/NR2F2/PODXL/ETS2/PHACTR4/MAF/BCL2/GATA3/TAPT1/IGF1/ACVR1/BTG1/INHBB/CALB1/HOXA5/COL6A3/MAFG/H2AFY/COL2A1/HS2ST1	53
GO:0051254	positive regulation of RNA metabolic process	48/261	236/2052	0.000291175	0.00824173	0.00673781	NFIA/SOX11/GATA2/CCNC/NFIB/RBPMS2/HIF1A/EN2/GATA6/INSIG1/NFYB/ARID5B/HOXA11/SSBP3/TBX3/ZFHX4/CNOT7/NPAS2/MYCN/RARB/THRB/RBM24/IRF2/TBPL1/ASXL2/RREB1/FOXP1/ACVR2A/CHD7/FOS/YAP1/FZD4/MEF2A/MYB/NR2F2/MAF/SP3/SETD3/GATA3/MYBL1/IGF1/ACVR1/HOXA3/HOXB3/MAFB/HOXA5/MAFG/GLI2	48
GO:2000026	regulation of multicellular organismal development	47/261	204/2052	1.17187e-05	0.000674838	0.000551696	RAB14/GATA2/NFIB/SMAD6/GATA6/SEMA3A/HOXA11/EPHA4/TGFBR2/RGMA/PAFAH1B1/DPYSL2/RARB/THBS2/NTRK3/VEGFA/EPHA7/BMP2/RBM24/KIT/FOXP1/HDAC9/NOG/FLRT3/ACVR2A/CHD7/FOS/ZEB1/BMPR1B/ETS1/FZD4/MTMR2/TSPAN12/MAF/BCL2/GATA3/TAPT1/DDX6/IGF1/ACVR1/BTG1/SNAP25/NEUROD1/MAFB/HOXA5/MAFG/H2AFY	47
GO:1902680	positive regulation of RNA biosynthetic process	47/261	226/2052	0.000194394	0.00616267	0.00503812	NFIA/SOX11/GATA2/CCNC/NFIB/RBPMS2/HIF1A/EN2/GATA6/INSIG1/NFYB/ARID5B/HOXA11/SSBP3/TBX3/ZFHX4/CNOT7/NPAS2/MYCN/RARB/THRB/IRF2/TBPL1/ASXL2/RREB1/FOXP1/ACVR2A/CHD7/FOS/YAP1/FZD4/MEF2A/MYB/NR2F2/MAF/SP3/SETD3/GATA3/MYBL1/IGF1/ACVR1/HOXA3/HOXB3/MAFB/HOXA5/MAFG/GLI2	47
GO:1903508	positive regulation of nucleic acid-templated transcription	47/261	226/2052	0.000194394	0.00616267	0.00503812	NFIA/SOX11/GATA2/CCNC/NFIB/RBPMS2/HIF1A/EN2/GATA6/INSIG1/NFYB/ARID5B/HOXA11/SSBP3/TBX3/ZFHX4/CNOT7/NPAS2/MYCN/RARB/THRB/IRF2/TBPL1/ASXL2/RREB1/FOXP1/ACVR2A/CHD7/FOS/YAP1/FZD4/MEF2A/MYB/NR2F2/MAF/SP3/SETD3/GATA3/MYBL1/IGF1/ACVR1/HOXA3/HOXB3/MAFB/HOXA5/MAFG/GLI2	47
GO:0045893	positive regulation of transcription, DNA-templated	45/261	215/2052	0.000232895	0.00694526	0.00567791	NFIA/SOX11/GATA2/CCNC/NFIB/HIF1A/EN2/GATA6/INSIG1/NFYB/HOXA11/SSBP3/TBX3/ZFHX4/CNOT7/NPAS2/MYCN/RARB/THRB/IRF2/TBPL1/ASXL2/RREB1/FOXP1/ACVR2A/CHD7/FOS/YAP1/FZD4/MEF2A/MYB/NR2F2/MAF/SP3/SETD3/GATA3/MYBL1/IGF1/ACVR1/HOXA3/HOXB3/MAFB/HOXA5/MAFG/GLI2	45
GO:0045595	regulation of cell differentiation	44/261	189/2052	1.76957e-05	0.000953285	0.000779332	PLEKHB2/GATA2/RBPMS2/SMAD6/GATA6/INSIG1/SEMA3A/HOXA11/TBX3/EPHA4/TGFBR2/RGMA/PAFAH1B1/FAM60A/SKI/DPYSL2/RARB/NTRK3/EPHA7/BMP2/RBM24/KIT/FOXP1/HDAC9/NOG/ACVR2A/CHD7/FOS/ZEB1/BMPR1B/FZD4/MAF/BCL2/GATA3/DDX6/IGF1/ACVR1/BTG1/SNAP25/NEUROD1/MAFB/HOXA5/MAFG/H2AFY	44
GO:0006468	protein phosphorylation	42/261	195/2052	0.00019892	0.00616267	0.00503812	CCNL2/CCNC/PTPRJ/PRKAR1A/RBPMS2/DYRK2/CDC42/EPHA4/TAOK3/TGFBR2/RPS6KA5/CNOT7/MAGI3/CCND1/PDGFRA/PAFAH1B1/CSNK1G1/CCND2/NTRK3/VEGFA/EPHA7/EPHA5/BMP2/YES1/STK4/KIT/ACVR2B/AFAP1/ACVR2A/YAP1/BMPR1B/FZD4/NR2F2/CAV1/BCL2/CAMK2D/PDGFC/TIMP3/IGF1/ACVR1/INHBB/H2AFY	42
GO:0009887	animal organ morphogenesis	41/261	150/2052	4.15639e-07	4.62745e-05	3.78305e-05	GATA2/NFIB/PAX9/RBPMS2/GATA6/ALDH1A2/INSIG1/HAS2/HOXA11/HOXC8/TBX3/SOBP/NRP1/TGFBR2/RAB33B/PDGFRA/NBL1/PAFAH1B1/RARB/THRB/BMP2/ASXL2/CHD7/BMPR1B/TSPAN12/PHACTR4/BCL2/SP3/PDGFC/GATA3/IGF1/ACVR1/HOXA3/NEUROD1/HOXB3/CALB1/MAFB/HOXA5/COL6A3/COL2A1/HS2ST1	41
GO:0035295	tube development	40/261	116/2052	3.29385e-10	5.50073e-07	4.49697e-07	GATA2/NFIB/RBPMS2/GATA6/ALDH1A2/HAS2/HOXA11/TBX3/MYH9/NRP1/EPHA4/TGFBR2/NBL1/RARB/THBS2/VEGFA/THRB/EPHA7/KIT/FOXP1/CHD7/ETS1/FZD4/NR2F2/TSPAN12/PODXL/ETS2/SAT1/PHACTR4/BCL2/SP3/PDGFC/GATA3/ACVR1/BTG1/CALB1/HOXA5/ITGAV/COL2A1/HS2ST1	40
GO:0019220	regulation of phosphate metabolic process	39/261	173/2052	0.000123181	0.00428568	0.00350365	CCNL2/CCNC/PPP1R12A/PTPRJ/PRKAR1A/RBPMS2/SMAD6/EN2/CDC42/RIMBP2/EPHA4/TAOK3/RCAN3/CNOT7/MAGI3/CCND1/PDGFRA/PAFAH1B1/CCND2/NTRK3/VEGFA/EPHA7/BMP2/STK4/KIT/ACVR2A/FZD4/MTMR2/NR2F2/CAV1/PHACTR4/BCL2/PDGFC/TIMP3/IGF1/ACVR1/INHBB/H2AFY/YWHAB	39
GO:0051174	regulation of phosphorus metabolic process	39/261	173/2052	0.000123181	0.00428568	0.00350365	CCNL2/CCNC/PPP1R12A/PTPRJ/PRKAR1A/RBPMS2/SMAD6/EN2/CDC42/RIMBP2/EPHA4/TAOK3/RCAN3/CNOT7/MAGI3/CCND1/PDGFRA/PAFAH1B1/CCND2/NTRK3/VEGFA/EPHA7/BMP2/STK4/KIT/ACVR2A/FZD4/MTMR2/NR2F2/CAV1/PHACTR4/BCL2/PDGFC/TIMP3/IGF1/ACVR1/INHBB/H2AFY/YWHAB	39
GO:0009790	embryo development	37/261	127/2052	2.83519e-07	3.60911e-05	2.95053e-05	RAB14/GATA2/PRKAR1A/RBPMS2/EN2/GATA6/ALDH1A2/INSIG1/HOXA11/TBX3/SOBP/EPHA4/TGFBR2/HSPA8/PDGFRA/NBL1/PAFAH1B1/RARB/KIT/ACVR2B/FLRT3/ACVR2A/CHD7/PHACTR4/GLI3/SP3/SP8/PDGFC/GATA3/IGF1/ACVR1/HOXA3/HOXB3/MAFB/HOXA5/COL2A1/HS2ST1	37
GO:0072359	circulatory system development	33/261	129/2052	3.01775e-05	0.00148225	0.00121177	GATA2/PRKAR1A/GATA6/ALDH1A2/HAS2/TBX3/MYH9/NRP1/TGFBR2/RARB/THBS2/NTRK3/VEGFA/BMP2/KIT/FOXP1/HDAC9/FLRT3/CHD7/ETS1/FZD4/GJA1/NR2F2/TSPAN12/ETS2/SAT1/GATA3/IGF1/ACVR1/BTG1/HOXA5/ITGAV/COL2A1	33
GO:0060429	epithelium development	32/261	117/2052	8.96765e-06	0.000534856	0.000437257	NFIB/GATA6/ALDH1A2/CDC42/HOXA11/VCL/TBX3/EPHA4/PAFAH1B1/RARB/NTRK3/THRB/EPHA7/FOXP1/NOG/FLRT3/CHD7/NR2F2/PODXL/ETS2/PHACTR4/MAF/BCL2/GATA3/ACVR1/BTG1/CALB1/HOXA5/MAFG/H2AFY/COL2A1/HS2ST1	32
GO:0035239	tube morphogenesis	31/261	89/2052	3.09334e-08	1.72196e-05	1.40774e-05	GATA2/NFIB/RBPMS2/GATA6/ALDH1A2/HAS2/HOXA11/TBX3/MYH9/NRP1/EPHA4/NBL1/THBS2/VEGFA/EPHA7/CHD7/ETS1/FZD4/NR2F2/TSPAN12/PODXL/ETS2/SAT1/PHACTR4/BCL2/GATA3/ACVR1/BTG1/HOXA5/ITGAV/HS2ST1	31
GO:0048598	embryonic morphogenesis	29/261	95/2052	2.1978e-06	0.000182264	0.000149005	GATA2/PRKAR1A/RBPMS2/GATA6/ALDH1A2/INSIG1/HOXA11/TBX3/SOBP/HSPA8/PDGFRA/NBL1/RARB/ACVR2B/FLRT3/ACVR2A/CHD7/PHACTR4/SP3/SP8/GATA3/IGF1/ACVR1/HOXA3/HOXB3/MAFB/HOXA5/COL2A1/HS2ST1	29
GO:0048568	embryonic organ development	27/261	72/2052	4.34345e-08	1.81339e-05	1.48249e-05	GATA2/RBPMS2/EN2/ALDH1A2/INSIG1/HOXA11/TBX3/SOBP/TGFBR2/HSPA8/PDGFRA/NBL1/RARB/KIT/CHD7/PHACTR4/GLI3/SP3/PDGFC/GATA3/IGF1/ACVR1/HOXA3/HOXB3/MAFB/HOXA5/COL2A1	27
GO:0001501	skeletal system development	27/261	98/2052	4.1504e-05	0.00198033	0.00161897	NFIB/SMAD6/INSIG1/HOXA11/HOXC8/TBX3/RAB33B/PDGFRA/PAFAH1B1/RARB/BMP2/KIT/NOG/ACVR2A/CHD7/BMPR1B/HAPLN1/MAF/SP3/PDGFC/TAPT1/IGF1/HOXA3/HOXB3/HOXA5/COL6A3/COL2A1	27
GO:0000122	negative regulation of transcription by RNA polymerase II	26/261	98/2052	0.000117126	0.00428568	0.00350365	NFIA/SOX11/PER2/GATA2/NFIB/GATA6/HOXC8/TBX3/ZFHX4/BRMS1L/CNOT7/CCND1/RARB/THRB/BMP2/RREB1/FOXP1/HDAC9/MAFK/NR2F2/MAF/SP3/GATA3/MIER1/HOXB3/H2AFY	26
GO:0048729	tissue morphogenesis	24/261	88/2052	0.000135796	0.00462814	0.00378361	PRKAR1A/ALDH1A2/CDC42/HOXA11/VCL/TBX3/NRP1/EPHA4/PAFAH1B1/EPHA7/ACVR2B/FLRT3/ACVR2A/CHD7/PODXL/ETS2/PHACTR4/BCL2/GATA3/IGF1/ACVR1/HOXA5/COL6A3/HS2ST1	24
GO:0007423	sensory organ development	24/261	90/2052	0.000199272	0.00616267	0.00503812	GATA2/INSIG1/SOBP/EPHA4/TGFBR2/NBL1/PAFAH1B1/RARB/NTRK3/NOG/CHD7/FZD4/TSPAN12/MAB21L1/PHACTR4/MAF/BCL2/SP3/GATA3/IGF1/NEUROD1/CALB1/MAFB/COL2A1	24
GO:0051093	negative regulation of developmental process	24/261	90/2052	0.000199272	0.00616267	0.00503812	GATA2/NFIB/RBPMS2/SMAD6/INSIG1/SEMA3A/TBX3/EPHA4/RGMA/FAM60A/SKI/RARB/THBS2/EPHA7/FOXP1/NOG/ZNF706/MTMR2/BCL2/GATA3/DDX6/IGF1/MAFB/HOXA5	24
GO:0048562	embryonic organ morphogenesis	20/261	55/2052	4.81166e-06	0.000334812	0.000273716	GATA2/RBPMS2/ALDH1A2/INSIG1/HOXA11/TBX3/SOBP/PDGFRA/NBL1/RARB/CHD7/PHACTR4/SP3/IGF1/ACVR1/HOXA3/HOXB3/MAFB/HOXA5/COL2A1	20
GO:0045596	negative regulation of cell differentiation	20/261	71/2052	0.000313222	0.00871802	0.00712718	GATA2/RBPMS2/SMAD6/INSIG1/SEMA3A/TBX3/EPHA4/RGMA/FAM60A/SKI/RARB/EPHA7/FOXP1/NOG/BCL2/GATA3/DDX6/IGF1/MAFB/HOXA5	20
GO:0002009	morphogenesis of an epithelium	17/261	55/2052	0.000265849	0.00765461	0.00625782	ALDH1A2/CDC42/HOXA11/VCL/TBX3/EPHA4/PAFAH1B1/EPHA7/FLRT3/PODXL/ETS2/PHACTR4/BCL2/GATA3/ACVR1/HOXA5/HS2ST1	17
GO:0071900	regulation of protein serine/threonine kinase activity	15/261	42/2052	9.96875e-05	0.00378359	0.00309318	CCNL2/CCNC/PTPRJ/PRKAR1A/EPHA4/TAOK3/CCND1/CCND2/NTRK3/KIT/FZD4/NR2F2/PDGFC/IGF1/H2AFY	15
GO:0043583	ear development	14/261	31/2052	7.34808e-06	0.000454492	0.000371558	GATA2/INSIG1/SOBP/EPHA4/NBL1/PAFAH1B1/RARB/CHD7/MAF/BCL2/GATA3/IGF1/MAFB/COL2A1	14
GO:0048839	inner ear development	13/261	29/2052	1.75072e-05	0.000953285	0.000779332	GATA2/INSIG1/SOBP/EPHA4/NBL1/PAFAH1B1/RARB/CHD7/MAF/GATA3/IGF1/MAFB/COL2A1	13
GO:0060562	epithelial tube morphogenesis	13/261	32/2052	6.26715e-05	0.00255272	0.00208691	ALDH1A2/HOXA11/TBX3/EPHA4/EPHA7/PODXL/ETS2/PHACTR4/BCL2/GATA3/ACVR1/HOXA5/HS2ST1	13

## Sheet: KEGG
KEGG pathway analysis for target genes of 16 overlapped DE miRNAs between different age stages.
ID	Description	GeneRatio	BgRatio	pvalue	p.adjust	qvalue	geneID	Count
gga04350	TGF-beta signaling pathway	30/490	90/4937	7.77638e-10	9.2539e-08	7.61267e-08	TGIF1/SMAD7/BMPR2/SMAD6/SMURF1/ZFYVE9/TGFBR2/E2F5/RGMA/BAMBI/NBL1/BMP2/PPP2CA/ACVR1B/ACVR2B/ID4/NOG/TGIF2/THBS1/ACVR2A/BMPR1B/FBN1/ROCK1/RGMB/SMAD1/ACVR1/INHBB/SKP1/TGFBR1/LTBP1	30
gga04010	MAPK signaling pathway	52/490	261/4937	4.15741e-07	2.47366e-05	2.03494e-05	MAP2K4/DUSP10/NF1/CACNA1H/DUSP1/RAP1B/NLK/DUSP5/CDC42/CACNA1C/MAP3K13/MAP3K2/AKT3/RASA1/TAOK3/TGFBR2/RPS6KA5/MAP3K5/PPP3R1/CRK/HSPA8/PDGFRA/SOS1/RPS6KA2/MAP3K3/NFATC1/DUSP8/PRKACB/FGF4/VEGFA/RAPGEF2/MAP3K1/DUSP16/STK4/KIT/MAP3K4/ERBB4/IGF1R/MET/PAK2/FOS/SOS2/CACNB2/MAP4K3/FGF7/MAP3K7/PDGFC/MAPK14/MAP4K4/STK3/IGF1/TGFBR1	52
gga04510	Focal adhesion	39/490	189/4937	5.24965e-06	0.000208236	0.000171304	RAP1B/PPP1R12A/PTEN/CDC42/VCL/PIK3R3/SHC4/AKT3/ITGB8/CRK/CCND1/PDGFRA/SOS1/CCND2/THBS2/VEGFA/COL4A5/IGF1R/MET/PAK2/THBS1/FN1/SOS2/CAV1/LAMC1/ROCK1/BCL2/PDPK1/PDGFC/IGF1/TLN2/VAV2/ROCK2/COL6A3/COL4A1/ITGAV/COL2A1/PPP1CB/ITGA9	39
gga04114	Oocyte meiosis	25/490	99/4937	7.3338e-06	0.00021818	0.000179485	CPEB3/ITPR1/CPEB2/CAMK2A/CPEB4/CPEB1/PPP3R1/RPS6KA2/FBXW11/ADCY2/PRKACB/PPP2CA/IGF1R/PPP2R5E/CAMK2D/YWHAQ/MAPK14/CALM1/IGF1/ADCY1/CALM2/SKP1/AR/YWHAB/PPP1CB	25
gga04120	Ubiquitin mediated proteolysis	29/490	127/4937	1.1733e-05	0.000279246	0.00022972	FBXW7/UBE2Z/UBE2W/WWP2/NEDD4L/CUL3/SMURF1/UBE2G1/ITCH/TRIM37/FBXW11/MID1/MAP3K1/NEDD4/CUL4B/UBE2D1/UBE2F/UBE2K/UBE2E1/UBE2E3/UBE3C/UBE3A/UBE2B/UBE2N/UBE2D2/SKP1/BIRC6/CUL5/UBE2D3	29
gga04144	Endocytosis	43/490	228/4937	1.90742e-05	0.000378306	0.000311211	WASL/RAB11FIP2/CLTC/NEDD4L/KIF5B/CDC42/PDCD6IP/SMURF1/ARF1/ITCH/RAB11FIP5/ZFYVE9/TGFBR2/AP2B1/LDLRAP1/HSPA8/RAB22A/PDGFRA/TSG101/DAB2/PSD/RAB11FIP4/IQSEC1/NEDD4/PARD6B/RAB5C/IGF1R/PIP5K1B/EHD3/GIT2/VPS26A/CAV1/KIF5C/RAB35/PSD3/EPS15/RAB5A/VPS37A/SNX2/RAB4A/CHMP4B/TGFBR1/STAM	43
gga04810	Regulation of actin cytoskeleton	37/490	190/4937	3.60458e-05	0.000577694	0.000475237	IQGAP2/WASL/PPP1R12A/CHRM2/CDC42/VCL/PIK3R3/PFN2/ITGB8/CRK/SSH2/TIAM1/PDGFRA/SOS1/WASF1/PIP4K2A/FGF4/PAK2/PIP5K1B/FN1/CXCL12/SOS2/ROCK1/FGF7/PDGFC/ENAH/ABI2/EZR/TMSB4Y/ARHGEF4/VAV2/ROCK2/RDX/ITGAV/TMSB4X/PPP1CB/ITGA9	37
gga04340	Hedgehog signaling pathway	14/490	43/4937	3.88366e-05	0.000577694	0.000475237	CUL3/SMURF1/CCND1/CSNK1G1/CCND2/FBXW11/SPOPL/PRKACB/PTCH1/LRP2/GLI3/BCL2/GLI2/GAS1	14
gga04310	Wnt signaling pathway	29/490	141/4937	9.26928e-05	0.0012256	0.00100824	FZD10/CAMK2A/NLK/TBL1XR1/CTNNBIP1/SERPINF1/PPP3R1/BAMBI/VANGL1/SFRP4/CCND1/TBL1X/CCND2/NFATC1/FBXW11/PRKACB/AXIN2/CTBP2/FZD4/RSPO2/MAP3K7/CAMK2D/ZNRF3/LRP6/NKD1/FZD6/PRICKLE2/SKP1/ROCK2	29
gga04330	Notch signaling pathway	14/490	49/4937	0.00019093	0.00227207	0.0018691	KAT2B/NOTCH1/ATXN1/MAML1/CTBP2/MAML3/NCSTN/JAG1/NUMB/ADAM17/HEY2/NOTCH2/DLL1/DLL4	14
gga04261	Adrenergic signaling in cardiomyocytes	25/490	128/4937	0.000639487	0.00671405	0.00552328	ADRB1/ATP2A2/CAMK2A/ATP2B4/ACTC1/CACNA1C/AKT3/RPS6KA5/CREB5/RAPGEF4/ADCY2/PRKACB/ATP2B2/PPP2R2A/PPP2CA/PPP2R5E/CACNB2/ATP1B3/BCL2/CAMK2D/MAPK14/CALM1/ADCY1/CALM2/PPP1CB	25
gga04218	Cellular senescence	27/490	143/4937	0.000684761	0.00671405	0.00552328	ITPR1/TSC1/LIN54/PTEN/TRPM7/RBL2/HIPK3/HIPK1/PIK3R3/AKT3/TGFBR2/E2F5/PPP3R1/CCND1/CCND2/NFATC1/FBXW11/HIPK2/ETS1/RBBP4/SIRT1/E2F3/MAPK14/CALM1/CALM2/TGFBR1/PPP1CB	27
gga04068	FoxO signaling pathway	24/490	122/4937	0.000733468	0.00671405	0.00552328	BCL2L11/NLK/IRS2/PTEN/S1PR1/RBL2/PIK3R3/SETD7/AKT3/TGFBR2/CCND1/SOS1/CCND2/USP7/STK4/IGF1R/SOS2/SIRT1/PDPK1/MAPK14/IGF1/TGFBR1/PRKAA2/PRKAG2	24
