# Supplementary material for: Identification and expression pattern analysis of miRNAs in pectoral muscle during pigeon (Columba livia) development
Source: PeerJ. 2021 Jun 23;9:e11438. doi: 10.7717/peerj.11438 (PMC8234919; doi:10.7717/peerj.11438)
Supplement: Supplemental Information 9 [file peerj-09-11438-s009.xlsx]

## Sheet: Profile 0
miRNA name	Log normalize data ─ transforms the vector to (0; log2(v1/v0), log2( v2/v0), …,log2(vn/v0))
	1d	28d	2yr
cli-miR-199-3p	0	-2.52	-5.2
cli-miR-148a-3p	0	-1.32	-2.58
cli-miR-92-3p	0	-1.35	-2.6
cli-miR-199-5p	0	-2.51	-4.71
cli-miR-125-5p	0	-0.6	-1.21
cli-miR-128-3p	0	-1.21	-2.38
cli-miR-100-5p	0	-0.97	-1.56
cli-miR-454-3p	0	-3.75	-6.38
cli-miR-2954-3p	0	-0.33	-1.15
cli-miR-15c-5p	0	-0.97	-2.85
cli-miR-19b-3p	0	-1.06	-2.47
cli-miR-103-3p	0	-0.76	-2.71
cli-miR-107-3p	0	-0.76	-2.71
cli-miR-363-3p	0	-2	-4.72
cli-miR-301a-3p	0	-0.78	-2.85
cli-miR-17-5p	0	-0.74	-2.3
cli-miR-16b-5p	0	-0.94	-3.2
cli-miR-301b-3p	0	-3.7	-6.77
cli-miR-19a-3p	0	-0.98	-2.41
cli-miR-222a-3p	0	-2.24	-3.07
cli-miR-20a-5p	0	-0.86	-2.29
cli-miR-130c-3p	0	-2.56	-5.05
cli-miR-99-5p	0	-0.62	-1.16
cli-miR-221-3p	0	-1.67	-2.38
cli-miR-181a-3p	0	-1.13	-2.45
cli-miR-20b-5p	0	-2.07	-4.95
cli-miR-214-3p	0	-1.91	-3.61
cli-miR-30d-3p	0	-1.57	-2.16
cli-miR-1559-5p	0	-0.93	-1.77
cli-miR-460a-5p	0	-2.82	-4.93
cli-miR-1467-3p	0	-0.61	-1.49
cli-miR-455-5p	0	-4.17	-6.58
cli-miR-106-5p	0	-2.11	-4.18
cli-miR-9-5p	0	-1.49	-3.48
cli-miR-214-5p	0	-2.3	-4.54
cli-miR-18b-5p	0	-2.44	-6.7
cli-miR-140-5p	0	-0.63	-1.76
cli-miR-106-3p	0	-2.93	-5.96
cli-miR-18a-5p	0	-2.58	-4.89
cli-miR-21-3p	0	-0.94	-2.49
cli-miR-138-5p	0	-1.32	-4.15
cli-miR-218-5p	0	-1.86	-3.39
cli-miR-17-3p	0	-0.98	-2.15
cli-miR-26-3p	0	-2.07	-5.7
cli-miR-455-3p	0	-3.56	-5.88
cli-miR-221-5p	0	-2.25	-3.71
cli-miR-383-5p	0	-5.19	-7.25
cli-miR-9-3p	0	-1.11	-1.89
cli-miR-1552-5p	0	-0.7	-2.47
cli-miR-1677-3p	0	-2.35	-4.57
conserve-cli-miR-148a-1-5p	0	-1.55	-2.74
cli-miR-205b-5p	0	-5.55	-15.59
cli-miR-130c-5p	0	-1.84	-4.68
cli-miR-1805-3p	0	-8.64	-14.96
cli-miR-100-3p	0	-2.98	-4.77
cli-miR-363-5p	0	-1.96	-6.81
cli-let-7f-3p	0	-0.93	-1.9
cli-miR-551b-3p	0	-0.98	-2.11
cli-let-7g-3p	0	-0.7	-1.97
cli-miR-490-3p	0	-4.87	-7.53
conserve-cli-miR-7115-3p	0	-4.69	-14.17
conserve-cli-miR-6690-5p	0	-1.52	-2.73
cli-miR-128-5p	0	-1.94	-3.58
cli-miR-18a-3p	0	-2.49	-3.94
cli-miR-2131-3p	0	-1.13	-2.35
cli-miR-20b-3p	0	-2.01	-5.46
cli-miR-460a-3p	0	-2.62	-4.65
cli-miR-1467-5p	0	-0.98	-1.92
cli-let-7c-3p	0	-2	-3.06
cli-miR-130a-5p	0	-1.2	-1.92
conserve-cli-miR-6356-5p	0	-4.8	-13.22
cli-miR-33-3p	0	-1	-2.22
cli-miR-454-5p	0	-2.57	-4.71
conserve-cli-miR-12255-3p	0	-2.89	-5.13
conserve-cli-miR-6542-3p	0	-4.52	-13
cli-miR-1677-5p	0	-2.36	-5.09
cli-miR-301b-5p	0	-3.15	-6.1
cli-miR-18b-3p	0	-2.7	-6.47
cli-miR-15c-3p	0	-3.58	-5.28
cli-miR-429-3p	0	-2.6	-5.04
conserve-cli-miR-6690-3p	0	-1.7	-4.22
cli-miR-15b-3p	0	-1.28	-3.54
cli-miR-551b-5p	0	-1.33	-3.16
conserve-cli-miR-7398g-5p	0	-5.08	-11.33
cli-miR-16b-3p	0	-1.66	-5.97
conserve-cli-miR-12250-3p	0	-1.71	-5.92
cli-miR-490-5p	0	-5.7	-11.02
novel-cli-miR-4-3p	0	-3.48	-9.81
conserve-cli-miR-12388-3p	0	-3.36	-9.61
