# Supplementary material for: Identification and expression pattern analysis of miRNAs in pectoral muscle during pigeon (Columba livia) development
Source: PeerJ. 2021 Jun 23;9:e11438. doi: 10.7717/peerj.11438 (PMC8234919; doi:10.7717/peerj.11438)
Supplement: Supplemental Information 10 [file peerj-09-11438-s010.xlsx]

## Sheet: Go
Function enrichment analysis for target genes of DE miRNAs（count reads >1000） in profile 0
ID	Description	GeneRatio	BgRatio	pvalue	p.adjust	qvalue	geneID	Count
GO:0010556	regulation of macromolecule biosynthetic process	132/362	474/2052	1.26e-10	3.01e-08	2.29e-08	RREB1/FOXP1/HDAC9/NOG/TGIF1/QKI/ZFHX4/MYCN/ACVR2A/BMP2/CHD7/FOS/NFIB/PLAG1/YAP1/ZEB1/ZNF706/BMPR1B/EIF4G2/ETS1/FZD4/MAFK/MEF2A/MYB/NR2F2/PHF20L1/RGMA/SOX11/CLOCK/H2AFY/HOXC8/INHBB/RBM24/MAFB/MAF/KIT/JARID2/MIER1/MAFG/ESR1/ACVR1/GLI2/NEUROD1/IGF2BP3/MYBL1/ITM2B/NFIA/PER2/CCNL2/GATA2/CCNC/PAX9/RBPMS2/DYRK2/SMAD6/CBFA2T3/HIF1A/EN2/GATA6/INSIG1/NFYB/ARID5B/HOXA11/SSBP3/TBX3/HOXD10/NPAS2/ETS2/TCF12/IR…	132
GO:2000112	regulation of cellular macromolecule biosynthetic process	131/362	465/2052	6.11e-11	3.01e-08	2.29e-08	RREB1/FOXP1/HDAC9/NOG/TGIF1/QKI/ZFHX4/MYCN/ACVR2A/BMP2/CHD7/FOS/NFIB/PLAG1/YAP1/ZEB1/ZNF706/BMPR1B/EIF4G2/ETS1/FZD4/MAFK/MEF2A/MYB/NR2F2/PHF20L1/RGMA/SOX11/CLOCK/H2AFY/HOXC8/INHBB/RBM24/MAFB/MAF/KIT/JARID2/MIER1/MAFG/ESR1/ACVR1/GLI2/NEUROD1/IGF2BP3/MYBL1/ITM2B/NFIA/PER2/CCNL2/GATA2/CCNC/PAX9/RBPMS2/DYRK2/SMAD6/CBFA2T3/HIF1A/EN2/GATA6/INSIG1/NFYB/ARID5B/HOXA11/SSBP3/TBX3/HOXD10/NPAS2/ETS2/TCF12/IR…	131
GO:0051252	regulation of RNA metabolic process	126/362	445/2052	1.23e-10	3.01e-08	2.29e-08	RREB1/MBNL1/FOXP1/HDAC9/NOG/TGIF1/ZFHX4/MYCN/ACVR2A/BMP2/CHD7/FOS/NFIB/PLAG1/YAP1/ZEB1/ZNF706/BMPR1B/ETS1/FZD4/MAFK/MEF2A/MYB/NR2F2/PHF20L1/RGMA/SOX11/CLOCK/H2AFY/HOXC8/INHBB/RBM24/MAFB/MAF/KIT/JARID2/MIER1/MAFG/ESR1/ACVR1/GLI2/NEUROD1/MYBL1/NFIA/PER2/CCNL2/GATA2/CCNC/PAX9/RBPMS2/SMAD6/CBFA2T3/HIF1A/EN2/GATA6/INSIG1/NFYB/ARID5B/HOXA11/SSBP3/TBX3/HOXD10/NPAS2/ETS2/TCF12/IRF2/BMI1/THRB/SEMA4D/LBH/C…	126
GO:1903506	regulation of nucleic acid-templated transcription	121/362	419/2052	8.14e-11	3.01e-08	2.29e-08	RREB1/FOXP1/HDAC9/NOG/TGIF1/ZFHX4/MYCN/ACVR2A/BMP2/CHD7/FOS/NFIB/PLAG1/YAP1/ZEB1/ZNF706/BMPR1B/ETS1/FZD4/MAFK/MEF2A/MYB/NR2F2/PHF20L1/RGMA/SOX11/CLOCK/H2AFY/HOXC8/INHBB/MAFB/MAF/KIT/JARID2/MIER1/MAFG/ESR1/ACVR1/GLI2/NEUROD1/MYBL1/NFIA/PER2/CCNL2/GATA2/CCNC/PAX9/RBPMS2/SMAD6/CBFA2T3/HIF1A/EN2/GATA6/INSIG1/NFYB/ARID5B/HOXA11/SSBP3/TBX3/HOXD10/NPAS2/ETS2/TCF12/IRF2/BMI1/THRB/SEMA4D/LBH/HMGB1/ISL1/HO…	121
GO:2001141	regulation of RNA biosynthetic process	121/362	419/2052	8.14e-11	3.01e-08	2.29e-08	RREB1/FOXP1/HDAC9/NOG/TGIF1/ZFHX4/MYCN/ACVR2A/BMP2/CHD7/FOS/NFIB/PLAG1/YAP1/ZEB1/ZNF706/BMPR1B/ETS1/FZD4/MAFK/MEF2A/MYB/NR2F2/PHF20L1/RGMA/SOX11/CLOCK/H2AFY/HOXC8/INHBB/MAFB/MAF/KIT/JARID2/MIER1/MAFG/ESR1/ACVR1/GLI2/NEUROD1/MYBL1/NFIA/PER2/CCNL2/GATA2/CCNC/PAX9/RBPMS2/SMAD6/CBFA2T3/HIF1A/EN2/GATA6/INSIG1/NFYB/ARID5B/HOXA11/SSBP3/TBX3/HOXD10/NPAS2/ETS2/TCF12/IRF2/BMI1/THRB/SEMA4D/LBH/HMGB1/ISL1/HO…	121
GO:0006351	transcription, DNA-templated	121/362	422/2052	1.41e-10	3.01e-08	2.29e-08	RREB1/FOXP1/HDAC9/NOG/TGIF1/ZFHX4/MYCN/ACVR2A/BMP2/CHD7/FOS/NFIB/PLAG1/YAP1/ZEB1/ZNF706/BMPR1B/ETS1/FZD4/MAFK/MEF2A/MYB/NR2F2/PBRM1/PHF20L1/RGMA/SOX11/CLOCK/H2AFY/HOXC8/INHBB/MAFB/MAF/KIT/JARID2/MIER1/MAFG/ESR1/ACVR1/GLI2/NEUROD1/MYBL1/NFIA/PER2/CCNL2/GATA2/CCNC/PAX9/RBPMS2/SMAD6/CBFA2T3/HIF1A/EN2/GATA6/INSIG1/NFYB/ARID5B/HOXA11/SSBP3/TBX3/HOXD10/NPAS2/ETS2/TCF12/IRF2/BMI1/THRB/SEMA4D/LBH/HMGB1/I…	121
GO:0006355	regulation of transcription, DNA-templated	120/362	413/2052	6.41e-11	3.01e-08	2.29e-08	RREB1/FOXP1/HDAC9/NOG/TGIF1/ZFHX4/MYCN/ACVR2A/BMP2/CHD7/FOS/NFIB/PLAG1/YAP1/ZEB1/ZNF706/BMPR1B/ETS1/FZD4/MAFK/MEF2A/MYB/NR2F2/PHF20L1/RGMA/SOX11/CLOCK/H2AFY/HOXC8/INHBB/MAFB/MAF/KIT/JARID2/MIER1/MAFG/ESR1/ACVR1/GLI2/NEUROD1/MYBL1/NFIA/PER2/CCNL2/GATA2/CCNC/PAX9/RBPMS2/SMAD6/CBFA2T3/HIF1A/EN2/GATA6/INSIG1/NFYB/ARID5B/HOXA11/SSBP3/TBX3/HOXD10/NPAS2/ETS2/TCF12/IRF2/BMI1/THRB/SEMA4D/LBH/HMGB1/ISL1/HO…	120
GO:0035295	tube development	49/362	116/2052	1.35e-10	3.01e-08	2.29e-08	FOXP1/CHD7/NFIB/VEGFA/ALDH1A2/ETS1/FZD4/NR2F2/THBS2/TSPAN12/NRP1/KIT/ITGAV/COL2A1/ACVR1/HS2ST1/GATA2/RBPMS2/GATA6/HAS2/HOXA11/TBX3/MYH9/PODXL/ETS2/SAT1/EPHA7/PHACTR4/BMI1/THRB/TRIM71/BTG1/ISL1/GREM1/SMAD5/CALB1/HOXA5/RECK/BCL2/RARB/FGFR1/THY1/EPHA4/SP3/PDGFC/ITGA6/TGFBR2/NBL1/PITX2	49
GO:0032774	RNA biosynthetic process	122/362	428/2052	1.76e-10	3.02e-08	2.3e-08	RREB1/FOXP1/HDAC9/NOG/TGIF1/ZFHX4/MYCN/ACVR2A/BMP2/CHD7/FOS/NFIB/PLAG1/YAP1/ZEB1/ZNF706/BMPR1B/ETS1/FZD4/MAFK/MEF2A/MYB/NR2F2/PBRM1/PHF20L1/RGMA/SOX11/CLOCK/H2AFY/HOXC8/INHBB/MAFB/MAF/KIT/JARID2/MIER1/MAFG/ESR1/ACVR1/GLI2/NEUROD1/MYBL1/NFIA/PER2/CCNL2/GATA2/CCNC/PAX9/RBPMS2/SMAD6/CBFA2T3/HIF1A/EN2/GATA6/INSIG1/NFYB/ARID5B/HOXA11/SSBP3/TBX3/HOXD10/NPAS2/ETS2/TCF12/IRF2/BMI1/THRB/SEMA4D/LBH/HMGB1/I…	122
GO:0097659	nucleic acid-templated transcription	122/362	428/2052	1.76e-10	3.02e-08	2.3e-08	RREB1/FOXP1/HDAC9/NOG/TGIF1/ZFHX4/MYCN/ACVR2A/BMP2/CHD7/FOS/NFIB/PLAG1/YAP1/ZEB1/ZNF706/BMPR1B/ETS1/FZD4/MAFK/MEF2A/MYB/NR2F2/PBRM1/PHF20L1/RGMA/SOX11/CLOCK/H2AFY/HOXC8/INHBB/MAFB/MAF/KIT/JARID2/MIER1/MAFG/ESR1/ACVR1/GLI2/NEUROD1/MYBL1/NFIA/PER2/CCNL2/GATA2/CCNC/PAX9/RBPMS2/SMAD6/CBFA2T3/HIF1A/EN2/GATA6/INSIG1/NFYB/ARID5B/HOXA11/SSBP3/TBX3/HOXD10/NPAS2/ETS2/TCF12/IRF2/BMI1/THRB/SEMA4D/LBH/HMGB1/I…	122
GO:0019219	regulation of nucleobase-containing compound metabolic process	130/362	471/2052	3.91e-10	6.08e-08	4.63e-08	RREB1/MBNL1/FOXP1/HDAC9/NOG/TGIF1/ZFHX4/MYCN/ACVR2A/BMP2/CHD7/FOS/NFIB/PLAG1/YAP1/ZEB1/ZNF706/BMPR1B/ETS1/FZD4/MAFK/MEF2A/MYB/NR2F2/PHF20L1/RGMA/SOX11/CLOCK/H2AFY/HOXC8/INHBB/RBM24/MAFB/MAF/KIT/JARID2/MIER1/MAFG/ESR1/ACVR1/GLI2/NEUROD1/MYBL1/NFIA/PER2/CCNL2/GATA2/CCNC/PAX9/RBPMS2/SMAD6/CBFA2T3/HIF1A/EN2/GATA6/INSIG1/NFYB/ARID5B/HOXA11/SSBP3/TBX3/HOXD10/NPAS2/ETS2/TCF12/IRF2/BMI1/THRB/SEMA4D/LBH/C…	130
GO:0009653	anatomical structure morphogenesis	101/362	337/2052	6.04e-10	8.62e-08	6.56e-08	ACVR2B/FOXP1/FN1/FLRT3/ACVR2A/BMP2/CHD7/NFIB/PDGFRA/SOBP/VEGFA/ALDH1A2/BMPR1B/ETS1/FZD4/MTMR2/NR2F2/PAFAH1B1/THBS2/TSPAN12/NRP1/HOXC8/COL6A3/ALCAM/MAFB/KIT/ITGAV/GAP43/COL2A1/ACVR1/NEUROD1/HS2ST1/GATA2/FARP1/PRKAR1A/PAX9/RBPMS2/HAND2/EN2/GATA6/INSIG1/CDC42/SEMA3A/HAS2/HOXA11/VCL/TBX3/MYH9/PODXL/ETS2/SAT1/EPHA7/PHACTR4/NTF3/BMI1/THRB/SEMA4D/WDR1/BTG1/ISL1/CSRP2/RELN/NEO1/ACTA2/CDH11/GREM1/IGF1/ASX…	101
GO:0031326	regulation of cellular biosynthetic process	133/362	490/2052	8.01e-10	1.05e-07	8.02e-08	RREB1/FOXP1/HDAC9/NOG/TGIF1/QKI/ZFHX4/MYCN/ACVR2A/BMP2/CHD7/FOS/NFIB/PLAG1/YAP1/ZEB1/ZNF706/BMPR1B/EIF4G2/ETS1/FZD4/MAFK/MEF2A/MYB/NR2F2/PHF20L1/RGMA/SOX11/CLOCK/H2AFY/HOXC8/INHBB/RBM24/MAFB/MAF/KIT/JARID2/MIER1/MAFG/ESR1/ACVR1/GLI2/NEUROD1/IGF2BP3/MYBL1/ITM2B/NFIA/PER2/CCNL2/GATA2/CCNC/PAX9/RBPMS2/DYRK2/SMAD6/CBFA2T3/HIF1A/EN2/GATA6/INSIG1/NFYB/ARID5B/HOXA11/SSBP3/TBX3/HOXD10/NPAS2/ETS2/TCF12/IR…	133
GO:0009889	regulation of biosynthetic process	133/362	494/2052	1.51e-09	1.85e-07	1.41e-07	RREB1/FOXP1/HDAC9/NOG/TGIF1/QKI/ZFHX4/MYCN/ACVR2A/BMP2/CHD7/FOS/NFIB/PLAG1/YAP1/ZEB1/ZNF706/BMPR1B/EIF4G2/ETS1/FZD4/MAFK/MEF2A/MYB/NR2F2/PHF20L1/RGMA/SOX11/CLOCK/H2AFY/HOXC8/INHBB/RBM24/MAFB/MAF/KIT/JARID2/MIER1/MAFG/ESR1/ACVR1/GLI2/NEUROD1/IGF2BP3/MYBL1/ITM2B/NFIA/PER2/CCNL2/GATA2/CCNC/PAX9/RBPMS2/DYRK2/SMAD6/CBFA2T3/HIF1A/EN2/GATA6/INSIG1/NFYB/ARID5B/HOXA11/SSBP3/TBX3/HOXD10/NPAS2/ETS2/TCF12/IR…	133
GO:0048523	negative regulation of cellular process	132/362	493/2052	2.79e-09	2.98e-07	2.27e-07	RREB1/FOXP1/HDAC9/NOG/PDS5B/TGIF1/ZFHX4/BMP2/CHD7/NFIB/RGS17/YAP1/ZEB1/ZNF706/BMPR1B/FZD4/MAFK/MTMR2/NR2F2/PAFAH1B1/RGMA/SOX11/H2AFY/HOXC8/INHBB/COL6A3/YWHAB/RBM24/MAFB/MAF/KIT/JARID2/CHMP4B/MIER1/COL2A1/DDX6/ACVR1/ITM2B/NFIA/USP28/NF1/PER2/GATA2/RAP1B/PTPRJ/PRKAR1A/RBPMS2/SMAD6/CBFA2T3/EN2/GATA6/INSIG1/CDC42/SEMA3A/TBX3/CACNA1C/RIMBP2/HSPA5/PODXL/NPAS2/CAV1/EPHA7/PHACTR4/NTF3/BMI1/THRB/PI15/TRIM…	132
GO:0050793	regulation of developmental process	80/362	251/2052	2.75e-09	2.98e-07	2.27e-07	FOXP1/HDAC9/NOG/FN1/FLRT3/ACVR2A/BMP2/CHD7/FOS/NFIB/VEGFA/ZEB1/ZNF706/BMPR1B/ETS1/FZD4/MTMR2/PAFAH1B1/RGMA/THBS2/TSPAN12/H2AFY/RBM24/MAFB/MAF/KIT/RAB14/MAFG/DDX6/ACVR1/NEUROD1/PLEKHB2/GATA2/RBPMS2/SMAD6/GATA6/INSIG1/CDC42/SEMA3A/HOXA11/TBX3/MYH9/EPHA7/TCF12/NTF3/BMI1/SEMA4D/BTG1/ISL1/SNAP25/HDAC4/SPRY2/GREM1/KITLG/SMAD5/IGF1/DPYSL2/HOXA5/RECK/BCL2/RARB/BDNF/FGFR1/FAM60A/DSCAM/NDEL1/THY1/EPHA4/ARF…	80
GO:0006366	transcription by RNA polymerase II	86/362	279/2052	3.9e-09	3.59e-07	2.73e-07	RREB1/FOXP1/HDAC9/NOG/ZFHX4/MYCN/ACVR2A/BMP2/CHD7/FOS/NFIB/YAP1/BMPR1B/ETS1/MAFK/MEF2A/NR2F2/PBRM1/RGMA/SOX11/H2AFY/HOXC8/INHBB/MAFB/MAF/MIER1/MAFG/ACVR1/NFIA/PER2/CCNL2/GATA2/CCNC/RBPMS2/HIF1A/EN2/GATA6/INSIG1/ARID5B/SSBP3/TBX3/ETS2/TCF12/IRF2/BMI1/THRB/SEMA4D/HMGB1/ISL1/NEO1/NR5A2/HDAC4/ERG/GREM1/TBP/SMAD5/CTDSPL/IGF1/ASXL2/HOXA3/CNOT7/HOXB3/HOXA5/TBPL1/LCORL/CCND1/SETD3/RARB/FGFR1/RAF1/ADCYAP1…	86
GO:0045595	regulation of cell differentiation	65/362	189/2052	3.86e-09	3.59e-07	2.73e-07	FOXP1/HDAC9/NOG/ACVR2A/BMP2/CHD7/FOS/ZEB1/BMPR1B/FZD4/PAFAH1B1/RGMA/H2AFY/RBM24/MAFB/MAF/KIT/MAFG/DDX6/ACVR1/NEUROD1/PLEKHB2/GATA2/RBPMS2/SMAD6/GATA6/INSIG1/SEMA3A/HOXA11/TBX3/EPHA7/TCF12/NTF3/BMI1/SEMA4D/BTG1/ISL1/SNAP25/HDAC4/SPRY2/GREM1/KITLG/SMAD5/IGF1/DPYSL2/HOXA5/RECK/BCL2/RARB/BDNF/FGFR1/FAM60A/DSCAM/NDEL1/THY1/EPHA4/ARF6/CDC73/BCL6/ITGA6/TGFBR2/SKI/NTRK3/SEMA3D/PITX2	65
GO:0019220	regulation of phosphate metabolic process	61/362	173/2052	4.19e-09	3.59e-07	2.73e-07	MAGI3/ACVR2A/BMP2/PDGFRA/VEGFA/FZD4/MTMR2/NR2F2/PAFAH1B1/H2AFY/INHBB/YWHAB/KIT/PPP1R12A/ACVR1/CCNL2/CCNC/PTPRJ/PRKAR1A/RBPMS2/SMAD6/EN2/CDC42/RIMBP2/STK4/CAV1/EPHA7/PHACTR4/FGFR3/SEMA4D/HMGB1/ISL1/RELN/HDAC4/SPRY2/GREM1/KITLG/CTDSPL/IGF1/CNOT7/CCNE1/CCND1/GHR/CCND2/BCL2/FGFR1/PDCD4/RAF1/WNT7B/DSCAM/ADCYAP1/THY1/EPHA4/YWHAE/PDGFC/ITGA6/TAOK3/RCAN3/NTRK3/PPP2R2D/SPRY1	61
GO:0051174	regulation of phosphorus metabolic process	61/362	173/2052	4.19e-09	3.59e-07	2.73e-07	MAGI3/ACVR2A/BMP2/PDGFRA/VEGFA/FZD4/MTMR2/NR2F2/PAFAH1B1/H2AFY/INHBB/YWHAB/KIT/PPP1R12A/ACVR1/CCNL2/CCNC/PTPRJ/PRKAR1A/RBPMS2/SMAD6/EN2/CDC42/RIMBP2/STK4/CAV1/EPHA7/PHACTR4/FGFR3/SEMA4D/HMGB1/ISL1/RELN/HDAC4/SPRY2/GREM1/KITLG/CTDSPL/IGF1/CNOT7/CCNE1/CCND1/GHR/CCND2/BCL2/FGFR1/PDCD4/RAF1/WNT7B/DSCAM/ADCYAP1/THY1/EPHA4/YWHAE/PDGFC/ITGA6/TAOK3/RCAN3/NTRK3/PPP2R2D/SPRY1	61
GO:0006357	regulation of transcription by RNA polymerase II	84/362	273/2052	6.95e-09	5.55e-07	4.23e-07	RREB1/FOXP1/HDAC9/NOG/ZFHX4/MYCN/ACVR2A/BMP2/CHD7/FOS/NFIB/YAP1/BMPR1B/ETS1/MAFK/MEF2A/NR2F2/RGMA/SOX11/H2AFY/HOXC8/INHBB/MAFB/MAF/MIER1/MAFG/ACVR1/NFIA/PER2/CCNL2/GATA2/CCNC/RBPMS2/HIF1A/EN2/GATA6/INSIG1/ARID5B/SSBP3/TBX3/ETS2/TCF12/IRF2/BMI1/THRB/SEMA4D/HMGB1/ISL1/NEO1/NR5A2/HDAC4/ERG/GREM1/SMAD5/CTDSPL/IGF1/ASXL2/HOXA3/CNOT7/HOXB3/HOXA5/TBPL1/LCORL/CCND1/SETD3/RARB/FGFR1/RAF1/ADCYAP1/ACTR2/SP3…	84
GO:2000026	regulation of multicellular organismal development	68/362	204/2052	7.14e-09	5.55e-07	4.23e-07	FOXP1/HDAC9/NOG/FLRT3/ACVR2A/BMP2/CHD7/FOS/NFIB/VEGFA/ZEB1/BMPR1B/ETS1/FZD4/MTMR2/PAFAH1B1/RGMA/THBS2/TSPAN12/H2AFY/RBM24/MAFB/MAF/KIT/RAB14/MAFG/DDX6/ACVR1/NEUROD1/GATA2/SMAD6/GATA6/SEMA3A/HOXA11/EPHA7/TCF12/NTF3/BMI1/SEMA4D/BTG1/ISL1/SNAP25/HDAC4/GREM1/KITLG/IGF1/DPYSL2/HOXA5/RECK/BCL2/RARB/BDNF/FGFR1/DSCAM/NDEL1/THY1/EPHA4/ARF6/CDC73/TFRC/BCL6/ITGA6/TGFBR2/NTRK3/SEMA3D/TAPT1/PITX2/SPRY1	68
GO:0030154	cell differentiation	123/362	461/2052	1.79e-08	1.33e-06	1.01e-06	ACVR2B/FOXP1/HDAC9/NOG/QKI/FLRT3/ACVR2A/BMP2/CHD7/FOS/NFIB/PDGFRA/VEGFA/ZEB1/ALDH1A2/BMPR1B/ETS1/FZD4/MEF2A/MTMR2/NR2F2/PAFAH1B1/RGMA/SOX11/NRP1/H2AFY/HOXC8/INHBB/COL6A3/ALCAM/RBM24/MAFB/MAF/KIT/JARID2/GAP43/MAFG/COL2A1/DDX6/ACVR1/NEUROD1/SYT1/PLEKHB2/GATA2/FARP1/PRKAR1A/RBPMS2/SMAD6/CBFA2T3/EN2/GATA6/INSIG1/CDC42/SEMA3A/HAS2/HOXA11/VCL/TBX3/MYH9/ETS2/CAV1/EPHA7/PHACTR4/TCF12/NTF3/BMI1/THRB/SEMA4…	123
GO:0034654	nucleobase-containing compound biosynthetic process	127/362	488/2052	5.18e-08	3.69e-06	2.81e-06	RREB1/FOXP1/HDAC9/NOG/TGIF1/ZFHX4/MYCN/ACVR2A/BMP2/CHD7/FOS/NFIB/PLAG1/YAP1/ZEB1/ZNF706/BMPR1B/ETS1/FZD4/MAFK/MEF2A/MYB/NR2F2/PBRM1/PHF20L1/RGMA/SOX11/CLOCK/H2AFY/HOXC8/INHBB/MAFB/MAF/KIT/JARID2/MIER1/PTGES3/MAFG/ESR1/ACVR1/GLI2/NEUROD1/MYBL1/NFIA/PER2/CCNL2/GATA2/CCNC/PAX9/RBPMS2/SMAD6/CBFA2T3/HIF1A/EN2/GATA6/INSIG1/NFYB/ARID5B/HOXA11/SSBP3/TBX3/HOXD10/NPAS2/ETS2/TCF12/IRF2/BMI1/THRB/SEMA4D/LBH/…	127
GO:0048869	cellular developmental process	126/362	484/2052	5.93e-08	4.06e-06	3.09e-06	ACVR2B/FOXP1/HDAC9/NOG/FN1/QKI/FLRT3/ACVR2A/BMP2/CHD7/FOS/NFIB/PDGFRA/VEGFA/ZEB1/ALDH1A2/BMPR1B/ETS1/FZD4/MEF2A/MTMR2/NR2F2/PAFAH1B1/RGMA/SOX11/NRP1/H2AFY/HOXC8/INHBB/COL6A3/ALCAM/RBM24/MAFB/MAF/KIT/JARID2/GAP43/MAFG/COL2A1/DDX6/ACVR1/NEUROD1/SYT1/PLEKHB2/GATA2/FARP1/PRKAR1A/RBPMS2/SMAD6/CBFA2T3/EN2/GATA6/INSIG1/CDC42/SEMA3A/HAS2/HOXA11/VCL/TBX3/MYH9/ETS2/CAV1/EPHA7/PHACTR4/TCF12/NTF3/BMI1/THRB/S…	126
GO:0031399	regulation of protein modification process	59/362	176/2052	6.87e-08	4.52e-06	3.44e-06	MAGI3/ACVR2A/BMP2/PDGFRA/VEGFA/FZD4/NR2F2/PAFAH1B1/H2AFY/INHBB/YWHAB/KIT/JARID2/PPP1R12A/ACVR1/CCNL2/GATA2/CCNC/PTPRJ/PRKAR1A/RBPMS2/CDC42/STK4/CAV1/EPHA7/PHACTR4/BMI1/FGFR3/HMGB1/ISL1/RELN/HDAC4/SPRY2/GREM1/KITLG/CTDSPL/IGF1/CNOT7/CCNE1/CCND1/GHR/CCND2/N4BP1/BCL2/FGFR1/PDCD4/RAF1/WNT7B/DCUN1D1/ADCYAP1/THY1/EPHA4/YWHAE/PDGFC/TAOK3/RCAN3/NTRK3/PPP2R2D/SPRY1	59
GO:0010604	positive regulation of macromolecule metabolic process	103/362	376/2052	1.06e-07	6.71e-06	5.11e-06	RREB1/FOXP1/ZFHX4/MYCN/ACVR2A/BMP2/CHD7/FOS/NFIB/PDGFRA/VEGFA/YAP1/ALDH1A2/FZD4/MEF2A/MYB/NR2F2/SOX11/H2AFY/INHBB/RBM24/MAFB/MAF/KIT/JARID2/PPP1R12A/MAFG/ESR1/ACVR1/GLI2/MYBL1/NFIA/GATA2/CCNC/RBPMS2/DYRK2/HIF1A/EN2/GATA6/INSIG1/CDC42/NFYB/ARID5B/HOXA11/SSBP3/TBX3/NPAS2/STK4/EPHA7/TCF12/IRF2/BMI1/THRB/FGFR3/HMGB1/ISL1/RELN/NR5A2/ACTA2/HDAC4/GREM1/KITLG/EYA4/SMAD5/TARDBP/IGF1/ASXL2/HOXA3/CNOT7/HOXB…	103
GO:0009888	tissue development	71/362	230/2052	1.22e-07	7.48e-06	5.69e-06	ACVR2B/FOXP1/HDAC9/NOG/FLRT3/ACVR2A/BMP2/CHD7/FOS/NFIB/VEGFA/ALDH1A2/BMPR1B/NR2F2/PAFAH1B1/NRP1/H2AFY/INHBB/COL6A3/RBM24/MAF/GAP43/MAFG/COL2A1/ACVR1/HS2ST1/PRKAR1A/SMAD6/GATA6/CDC42/SEMA3A/HAS2/ARID5B/HOXA11/VCL/TBX3/PODXL/ETS2/EPHA7/PHACTR4/BMI1/THRB/TRIM71/SEMA4D/BTG1/ISL1/CSRP2/NR5A2/ACTA2/HDAC4/GREM1/KITLG/SMAD5/IGF1/CALB1/HOXA5/COL12A1/EYA1/BCL2/RARB/FGFR1/WNT7B/EPHA4/CDC73/ITGA6/TGFBR2/NTRK…	71
GO:0048513	animal organ development	102/362	373/2052	1.39e-07	8.22e-06	6.26e-06	ACVR2B/FOXP1/HDAC9/NOG/FLRT3/ACVR2A/BMP2/CHD7/FOS/NFIB/PDGFRA/SOBP/VEGFA/ALDH1A2/BMPR1B/FZD4/GJA1/NR2F2/PAFAH1B1/TSPAN12/NRP1/H2AFY/HOXC8/INHBB/COL6A3/RBM24/MAFB/MAF/KIT/COL2A1/ACVR1/NEUROD1/HS2ST1/GATA2/PRKAR1A/PAX9/RBPMS2/SMAD6/EN2/GATA6/INSIG1/SEMA3A/HAS2/ARID5B/HOXA11/TBX3/MYH9/MAB21L1/ETS2/EPHA7/PHACTR4/BMI1/THRB/SEMA4D/ISL1/RELN/ACTA2/HDAC4/GREM1/KITLG/SMAD5/IGF1/LRP8/ASXL2/HOXA3/HSPA8/HOXB…	102
GO:0006796	phosphate-containing compound metabolic process	97/362	350/2052	1.56e-07	8.89e-06	6.77e-06	ACVR2B/AFAP1/CTDSPL2/MAGI3/PIP5K1B/ACVR2A/BMP2/CSNK1G1/PDGFRA/VEGFA/YAP1/BMPR1B/FZD4/MTMR2/NR2F2/PAFAH1B1/H2AFY/INHBB/YWHAB/KIT/ITPK1/PPP1R12A/ACVR1/PPP1CB/MBOAT2/CCNL2/CCNC/PTPRJ/PRKAR1A/RBPMS2/DYRK2/SMAD6/EN2/GATA6/CDC42/PI4K2B/RIMBP2/STK4/CAV1/EPHA7/PHACTR4/FGFR3/SEMA4D/ELOVL6/YES1/HMGB1/OLA1/RPS6KA5/ISL1/SGMS1/RELN/HDAC4/SPRY2/GREM1/KITLG/EYA4/SMAD5/CTDSPL/IGF1/PTPRG/HPRT1/CMPK1/CNOT7/TBPL1/C…	97
GO:0006793	phosphorus metabolic process	97/362	351/2052	1.82e-07	9.61e-06	7.32e-06	ACVR2B/AFAP1/CTDSPL2/MAGI3/PIP5K1B/ACVR2A/BMP2/CSNK1G1/PDGFRA/VEGFA/YAP1/BMPR1B/FZD4/MTMR2/NR2F2/PAFAH1B1/H2AFY/INHBB/YWHAB/KIT/ITPK1/PPP1R12A/ACVR1/PPP1CB/MBOAT2/CCNL2/CCNC/PTPRJ/PRKAR1A/RBPMS2/DYRK2/SMAD6/EN2/GATA6/CDC42/PI4K2B/RIMBP2/STK4/CAV1/EPHA7/PHACTR4/FGFR3/SEMA4D/ELOVL6/YES1/HMGB1/OLA1/RPS6KA5/ISL1/SGMS1/RELN/HDAC4/SPRY2/GREM1/KITLG/EYA4/SMAD5/CTDSPL/IGF1/PTPRG/HPRT1/CMPK1/CNOT7/TBPL1/C…	97
GO:0009790	embryo development	46/362	127/2052	1.78e-07	9.61e-06	7.32e-06	ACVR2B/FLRT3/ACVR2A/CHD7/PDGFRA/SOBP/ALDH1A2/PAFAH1B1/MAFB/KIT/RAB14/COL2A1/ACVR1/HS2ST1/GATA2/PRKAR1A/RBPMS2/EN2/GATA6/INSIG1/HOXA11/TBX3/PHACTR4/BMI1/TRIM71/ISL1/GREM1/KITLG/IGF1/HOXA3/HSPA8/HOXB3/HOXA5/COL12A1/RECK/RARB/FGFR1/EPHA4/SP3/GLI3/ZIC1/CDC73/PDGFC/TGFBR2/NBL1/PITX2	46
GO:0035239	tube morphogenesis	36/362	89/2052	1.85e-07	9.61e-06	7.32e-06	CHD7/NFIB/VEGFA/ALDH1A2/ETS1/FZD4/NR2F2/THBS2/TSPAN12/NRP1/ITGAV/ACVR1/HS2ST1/GATA2/RBPMS2/GATA6/HAS2/HOXA11/TBX3/MYH9/PODXL/ETS2/SAT1/EPHA7/PHACTR4/BTG1/ISL1/GREM1/HOXA5/RECK/BCL2/FGFR1/THY1/EPHA4/NBL1/PITX2	36
GO:0071900	regulation of protein serine/threonine kinase activity	22/362	42/2052	2.42e-07	1.22e-05	9.26e-06	FZD4/NR2F2/H2AFY/KIT/CCNL2/CCNC/PTPRJ/PRKAR1A/SPRY2/KITLG/IGF1/CCNE1/CCND1/CCND2/FGFR1/PDCD4/RAF1/EPHA4/PDGFC/TAOK3/NTRK3/SPRY1	22
GO:0018130	heterocycle biosynthetic process	127/362	500/2052	2.67e-07	1.27e-05	9.68e-06	RREB1/FOXP1/HDAC9/NOG/TGIF1/ZFHX4/MYCN/ACVR2A/BMP2/CHD7/FOS/NFIB/PLAG1/YAP1/ZEB1/ZNF706/BMPR1B/ETS1/FZD4/MAFK/MEF2A/MYB/NR2F2/PBRM1/PHF20L1/RGMA/SOX11/CLOCK/H2AFY/HOXC8/INHBB/MAFB/MAF/KIT/JARID2/MIER1/PTGES3/MAFG/ESR1/ACVR1/GLI2/NEUROD1/MYBL1/NFIA/PER2/CCNL2/GATA2/CCNC/PAX9/RBPMS2/SMAD6/CBFA2T3/HIF1A/EN2/GATA6/INSIG1/NFYB/ARID5B/HOXA11/SSBP3/TBX3/HOXD10/NPAS2/ETS2/TCF12/IRF2/BMI1/THRB/SEMA4D/LBH/…	127
GO:0048568	embryonic organ development	31/362	72/2052	2.64e-07	1.27e-05	9.68e-06	CHD7/PDGFRA/SOBP/ALDH1A2/MAFB/KIT/COL2A1/ACVR1/GATA2/RBPMS2/EN2/INSIG1/HOXA11/TBX3/PHACTR4/BMI1/KITLG/IGF1/HOXA3/HSPA8/HOXB3/HOXA5/RARB/FGFR1/SP3/GLI3/ZIC1/PDGFC/TGFBR2/NBL1/PITX2	31
GO:0006468	protein phosphorylation	62/362	195/2052	2.81e-07	1.3e-05	9.9e-06	ACVR2B/AFAP1/MAGI3/ACVR2A/BMP2/CSNK1G1/PDGFRA/VEGFA/YAP1/BMPR1B/FZD4/NR2F2/PAFAH1B1/H2AFY/INHBB/KIT/ACVR1/CCNL2/CCNC/PTPRJ/PRKAR1A/RBPMS2/DYRK2/CDC42/STK4/CAV1/EPHA7/FGFR3/YES1/HMGB1/RPS6KA5/ISL1/RELN/SPRY2/GREM1/KITLG/SMAD5/CTDSPL/IGF1/CNOT7/CCNE1/CCND1/GHR/CCND2/SGK1/BCL2/FGFR1/PDCD4/RAF1/WNT7B/ADCYAP1/THY1/EPHA4/YWHAE/CSNK1A1/PDGFC/TAOK3/TGFBR2/NTRK3/EPHA5/CAMK2D/SPRY1	62
GO:0009887	animal organ morphogenesis	51/362	150/2052	3.71e-07	1.63e-05	1.24e-05	BMP2/CHD7/NFIB/PDGFRA/SOBP/ALDH1A2/BMPR1B/PAFAH1B1/TSPAN12/NRP1/HOXC8/COL6A3/MAFB/COL2A1/ACVR1/NEUROD1/HS2ST1/GATA2/PAX9/RBPMS2/GATA6/INSIG1/HAS2/HOXA11/TBX3/PHACTR4/BMI1/THRB/ISL1/ACTA2/GREM1/IGF1/ASXL2/HOXA3/HOXB3/CALB1/HOXA5/COL12A1/BCL2/RARB/FGFR1/DSCAM/THY1/SP3/ZIC1/PDGFC/TGFBR2/RAB33B/NBL1/PITX2/SPRY1	51
GO:0042325	regulation of phosphorylation	51/362	150/2052	3.71e-07	1.63e-05	1.24e-05	MAGI3/ACVR2A/BMP2/PDGFRA/VEGFA/FZD4/NR2F2/PAFAH1B1/H2AFY/INHBB/KIT/ACVR1/CCNL2/CCNC/PTPRJ/PRKAR1A/RBPMS2/EN2/CDC42/STK4/CAV1/EPHA7/FGFR3/HMGB1/ISL1/RELN/HDAC4/SPRY2/GREM1/KITLG/CTDSPL/IGF1/CNOT7/CCNE1/CCND1/GHR/CCND2/BCL2/FGFR1/PDCD4/RAF1/WNT7B/DSCAM/ADCYAP1/THY1/EPHA4/PDGFC/ITGA6/TAOK3/NTRK3/SPRY1	51
GO:0007399	nervous system development	77/362	266/2052	6.65e-07	2.84e-05	2.17e-05	ACVR2B/FOXP1/FLRT3/CHD7/FOS/NFIB/ZEB1/ALDH1A2/FZD4/HAPLN1/MEF2A/MTMR2/NR2F2/PAFAH1B1/RGMA/SOX11/NRP1/HOXC8/ALCAM/MAFB/GAP43/COL2A1/DDX6/NEUROD1/GATA2/FARP1/SMAD6/EN2/CDC42/SEMA3A/VCL/TBX3/EPHA7/PHACTR4/GABRA1/TCF12/NTF3/BMI1/TRIM71/SEMA4D/ISL1/RELN/NEO1/SNAP25/HDAC4/IGF1/LRP8/FZD6/DPYSL2/SGK1/BCL2/RARB/BDNF/FGFR1/KIF2A/WNT7B/RAB18/DSCAM/GABRG2/ADCYAP1/NDEL1/THY1/EPHA4/YWHAE/ARF6/ZIC1/DPF3/NFASC/I…	77
GO:0031324	negative regulation of cellular metabolic process	80/362	280/2052	6.96e-07	2.91e-05	2.21e-05	RREB1/FOXP1/HDAC9/TGIF1/ZFHX4/BMP2/NFIB/YAP1/ZEB1/ZNF706/MAFK/NR2F2/PAFAH1B1/SOX11/H2AFY/HOXC8/INHBB/COL6A3/YWHAB/RBM24/MAF/JARID2/CHMP4B/MIER1/ITM2B/NFIA/PER2/GATA2/PTPRJ/PRKAR1A/SMAD6/CBFA2T3/GATA6/INSIG1/TBX3/RIMBP2/CAV1/BMI1/THRB/PI15/TRIM71/SEMA4D/ISL1/HDAC4/SPRY2/RCOR3/GREM1/SMAD5/CTDSPL/TARDBP/IGF1/CNOT7/HOXB3/CCND1/RECK/N4BP1/BCL2/RARB/CRIM1/FGFR1/PDCD4/IREB2/PDS5A/THY1/EPHA4/YWHAE/SP3/GL…	80
GO:0001932	regulation of protein phosphorylation	47/362	137/2052	8.4e-07	3.42e-05	2.61e-05	MAGI3/ACVR2A/BMP2/PDGFRA/VEGFA/FZD4/NR2F2/PAFAH1B1/H2AFY/INHBB/KIT/ACVR1/CCNL2/CCNC/PTPRJ/PRKAR1A/RBPMS2/CDC42/STK4/CAV1/EPHA7/FGFR3/HMGB1/ISL1/RELN/SPRY2/GREM1/KITLG/CTDSPL/IGF1/CNOT7/CCNE1/CCND1/GHR/CCND2/BCL2/FGFR1/PDCD4/RAF1/WNT7B/ADCYAP1/THY1/EPHA4/PDGFC/TAOK3/NTRK3/SPRY1	47
GO:0009893	positive regulation of metabolic process	105/362	400/2052	8.77e-07	3.49e-05	2.66e-05	RREB1/FOXP1/ZFHX4/MYCN/ACVR2A/BMP2/CHD7/FOS/NFIB/PDGFRA/VEGFA/YAP1/ALDH1A2/FZD4/MEF2A/MYB/NR2F2/SOX11/H2AFY/INHBB/RBM24/MAFB/MAF/KIT/JARID2/PPP1R12A/MAFG/ESR1/ACVR1/GLI2/MYBL1/NFIA/GATA2/CCNC/RBPMS2/DYRK2/HIF1A/EN2/GATA6/INSIG1/CDC42/NFYB/ARID5B/HOXA11/SSBP3/TBX3/NPAS2/STK4/EPHA7/TCF12/IRF2/BMI1/THRB/FGFR3/HMGB1/ISL1/RELN/NR5A2/ACTA2/HDAC4/GREM1/KITLG/EYA4/SMAD5/TARDBP/IGF1/HPRT1/ASXL2/HOXA3/CNOT…	105
GO:0031325	positive regulation of cellular metabolic process	100/362	377/2052	1.04e-06	4.06e-05	3.09e-05	RREB1/FOXP1/ZFHX4/MYCN/ACVR2A/BMP2/CHD7/FOS/NFIB/PDGFRA/VEGFA/YAP1/FZD4/MEF2A/MYB/NR2F2/SOX11/INHBB/RBM24/MAFB/MAF/KIT/JARID2/PPP1R12A/MAFG/ACVR1/GLI2/MYBL1/NFIA/GATA2/CCNC/RBPMS2/DYRK2/HIF1A/EN2/GATA6/INSIG1/CDC42/NFYB/ARID5B/HOXA11/SSBP3/TBX3/NPAS2/STK4/EPHA7/TCF12/IRF2/BMI1/THRB/FGFR3/HMGB1/ISL1/RELN/NR5A2/HDAC4/GREM1/KITLG/EYA4/SMAD5/IGF1/HPRT1/ASXL2/HOXA3/CNOT7/HOXB3/HOXA5/TBPL1/CCND1/GHR/EY…	100
GO:0032268	regulation of cellular protein metabolic process	74/362	256/2052	1.24e-06	4.74e-05	3.6e-05	MAGI3/QKI/ACVR2A/BMP2/PDGFRA/VEGFA/ZNF706/EIF4G2/FZD4/NR2F2/PAFAH1B1/H2AFY/INHBB/COL6A3/YWHAB/RBM24/KIT/JARID2/PPP1R12A/ACVR1/IGF2BP3/CCNL2/GATA2/CCNC/PTPRJ/PRKAR1A/RBPMS2/EN2/CDC42/STK4/CAV1/EPHA7/PHACTR4/BMI1/FGFR3/PI15/TRIM71/HMGB1/ISL1/RELN/HDAC4/SPRY2/GREM1/KITLG/CTDSPL/IGF1/CNOT7/CCNE1/CCND1/GHR/RECK/CCND2/N4BP1/BCL2/CRIM1/FGFR1/PDCD4/RAF1/WNT7B/IREB2/DCUN1D1/ADCYAP1/THY1/EPHA4/YWHAE/TNFAIP…	74
GO:1902680	positive regulation of RNA biosynthetic process	67/362	226/2052	1.64e-06	5.99e-05	4.56e-05	RREB1/FOXP1/ZFHX4/MYCN/ACVR2A/CHD7/FOS/NFIB/YAP1/FZD4/MEF2A/MYB/NR2F2/SOX11/MAFB/MAF/MAFG/ACVR1/GLI2/MYBL1/NFIA/GATA2/CCNC/RBPMS2/HIF1A/EN2/GATA6/INSIG1/NFYB/ARID5B/HOXA11/SSBP3/TBX3/NPAS2/TCF12/IRF2/THRB/HMGB1/ISL1/NR5A2/HDAC4/GREM1/SMAD5/IGF1/ASXL2/HOXA3/CNOT7/HOXB3/HOXA5/TBPL1/SETD3/RARB/FGFR1/NFE2L1/RAF1/ADCYAP1/ACTR2/SP3/EDF1/HDAC2/CDC73/DPF3/DR1/ITGA6/SRF/TLX1/PITX2	67
GO:1903508	positive regulation of nucleic acid-templated transcription	67/362	226/2052	1.64e-06	5.99e-05	4.56e-05	RREB1/FOXP1/ZFHX4/MYCN/ACVR2A/CHD7/FOS/NFIB/YAP1/FZD4/MEF2A/MYB/NR2F2/SOX11/MAFB/MAF/MAFG/ACVR1/GLI2/MYBL1/NFIA/GATA2/CCNC/RBPMS2/HIF1A/EN2/GATA6/INSIG1/NFYB/ARID5B/HOXA11/SSBP3/TBX3/NPAS2/TCF12/IRF2/THRB/HMGB1/ISL1/NR5A2/HDAC4/GREM1/SMAD5/IGF1/ASXL2/HOXA3/CNOT7/HOXB3/HOXA5/TBPL1/SETD3/RARB/FGFR1/NFE2L1/RAF1/ADCYAP1/ACTR2/SP3/EDF1/HDAC2/CDC73/DPF3/DR1/ITGA6/SRF/TLX1/PITX2	67
GO:0051173	positive regulation of nitrogen compound metabolic process	97/362	366/2052	1.71e-06	6.09e-05	4.64e-05	RREB1/FOXP1/ZFHX4/MYCN/ACVR2A/BMP2/CHD7/FOS/NFIB/PDGFRA/VEGFA/YAP1/FZD4/MEF2A/MYB/NR2F2/SOX11/INHBB/RBM24/MAFB/MAF/KIT/JARID2/PPP1R12A/MAFG/ACVR1/GLI2/MYBL1/NFIA/GATA2/CCNC/RBPMS2/HIF1A/EN2/GATA6/INSIG1/CDC42/NFYB/ARID5B/HOXA11/SSBP3/TBX3/NPAS2/STK4/EPHA7/TCF12/IRF2/BMI1/THRB/FGFR3/HMGB1/ISL1/RELN/NR5A2/HDAC4/GREM1/KITLG/EYA4/SMAD5/IGF1/HPRT1/ASXL2/HOXA3/CNOT7/HOXB3/HOXA5/TBPL1/CCND1/GHR/EYA1/BCL…	97
GO:0010628	positive regulation of gene expression	74/362	258/2052	1.75e-06	6.09e-05	4.64e-05	RREB1/FOXP1/ZFHX4/MYCN/ACVR2A/CHD7/FOS/NFIB/YAP1/ALDH1A2/FZD4/MEF2A/MYB/NR2F2/SOX11/H2AFY/RBM24/MAFB/MAF/KIT/MAFG/ESR1/ACVR1/GLI2/MYBL1/NFIA/GATA2/CCNC/HIF1A/EN2/GATA6/INSIG1/NFYB/HOXA11/SSBP3/TBX3/NPAS2/TCF12/IRF2/THRB/HMGB1/ISL1/NR5A2/ACTA2/HDAC4/GREM1/SMAD5/TARDBP/IGF1/ASXL2/HOXA3/CNOT7/HOXB3/HOXA5/TBPL1/SETD3/RARB/FGFR1/NFE2L1/RAF1/ADCYAP1/ACTR2/SP3/HDAC2/CDC73/DPF3/DR1/ITGA6/SRF/TGFBR2/NTRK3…	74
GO:0016310	phosphorylation	72/362	249/2052	1.78e-06	6.09e-05	4.64e-05	ACVR2B/AFAP1/MAGI3/PIP5K1B/ACVR2A/BMP2/CSNK1G1/PDGFRA/VEGFA/YAP1/BMPR1B/FZD4/NR2F2/PAFAH1B1/H2AFY/INHBB/KIT/ITPK1/ACVR1/CCNL2/CCNC/PTPRJ/PRKAR1A/RBPMS2/DYRK2/EN2/CDC42/PI4K2B/STK4/CAV1/EPHA7/FGFR3/YES1/HMGB1/RPS6KA5/ISL1/SGMS1/RELN/HDAC4/SPRY2/GREM1/KITLG/SMAD5/CTDSPL/IGF1/CMPK1/CNOT7/CCNE1/CCND1/GHR/CCND2/SGK1/BCL2/FGFR1/PDCD4/RAF1/WNT7B/DSCAM/ADCYAP1/THY1/EPHA4/YWHAE/CSNK1A1/PDGFC/ITGA6/TAOK3/T…	72
GO:0051254	positive regulation of RNA metabolic process	69/362	236/2052	1.97e-06	6.61e-05	5.03e-05	RREB1/FOXP1/ZFHX4/MYCN/ACVR2A/CHD7/FOS/NFIB/YAP1/FZD4/MEF2A/MYB/NR2F2/SOX11/RBM24/MAFB/MAF/MAFG/ACVR1/GLI2/MYBL1/NFIA/GATA2/CCNC/RBPMS2/HIF1A/EN2/GATA6/INSIG1/NFYB/ARID5B/HOXA11/SSBP3/TBX3/NPAS2/TCF12/IRF2/THRB/HMGB1/ISL1/NR5A2/HDAC4/GREM1/SMAD5/IGF1/ASXL2/HOXA3/CNOT7/HOXB3/HOXA5/TBPL1/SETD3/RARB/FGFR1/NFE2L1/RAF1/ADCYAP1/ACTR2/SP3/EDF1/HDAC2/CDC73/DPF3/DR1/ITGA6/SRF/TLX1/HABP4/PITX2	69
GO:0048468	cell development	75/362	264/2052	2.21e-06	7.26e-05	5.53e-05	FOXP1/HDAC9/FLRT3/BMP2/CHD7/NFIB/ZEB1/BMPR1B/FZD4/MTMR2/PAFAH1B1/RGMA/NRP1/INHBB/COL6A3/ALCAM/MAF/KIT/GAP43/DDX6/ACVR1/NEUROD1/GATA2/FARP1/PRKAR1A/SMAD6/EN2/CDC42/SEMA3A/HOXA11/VCL/MYH9/EPHA7/PHACTR4/TCF12/NTF3/SEMA4D/WDR1/ISL1/CSRP2/RELN/NEO1/SNAP25/HDAC4/KITLG/SMAD5/IGF1/DPYSL2/HOXA5/TBPL1/COL12A1/RECK/SGK1/BCL2/RARB/BDNF/FGFR1/WNT7B/DSCAM/ADCYAP1/NDEL1/THY1/EPHA4/ARF6/MAEA/BCL6/NFASC/ITGA6/VSX…	75
GO:0006464	cellular protein modification process	109/362	427/2052	2.35e-06	7.47e-05	5.68e-05	ACVR2B/MGAT4A/AFAP1/CTDSPL2/HDAC9/MAGI3/USP47/ACVR2A/BMP2/CSNK1G1/PDGFRA/VEGFA/YAP1/BMPR1B/FZD4/MTMR2/NR2F2/PAFAH1B1/UBE2F/CLOCK/H2AFY/INHBB/YWHAB/USP48/KIT/JARID2/MIER1/WIPI2/PPP1R12A/ABHD13/SKP1/ACVR1/PPP1CB/PCMTD1/USP28/CCNL2/GATA2/CCNC/PTPRJ/PRKAR1A/RBPMS2/DYRK2/CDC42/STK4/CAV1/EPHA7/PHACTR4/USP37/BMI1/FGFR3/TRIM71/YES1/HMGB1/RPS6KA5/ISL1/RELN/HDAC4/SPRY2/GREM1/KITLG/EYA4/UBE2V1/SMAD5/CTDSPL/…	109
GO:0036211	protein modification process	109/362	427/2052	2.35e-06	7.47e-05	5.68e-05	ACVR2B/MGAT4A/AFAP1/CTDSPL2/HDAC9/MAGI3/USP47/ACVR2A/BMP2/CSNK1G1/PDGFRA/VEGFA/YAP1/BMPR1B/FZD4/MTMR2/NR2F2/PAFAH1B1/UBE2F/CLOCK/H2AFY/INHBB/YWHAB/USP48/KIT/JARID2/MIER1/WIPI2/PPP1R12A/ABHD13/SKP1/ACVR1/PPP1CB/PCMTD1/USP28/CCNL2/GATA2/CCNC/PTPRJ/PRKAR1A/RBPMS2/DYRK2/CDC42/STK4/CAV1/EPHA7/PHACTR4/USP37/BMI1/FGFR3/TRIM71/YES1/HMGB1/RPS6KA5/ISL1/RELN/HDAC4/SPRY2/GREM1/KITLG/EYA4/UBE2V1/SMAD5/CTDSPL/…	109
GO:0045893	positive regulation of transcription, DNA-templated	64/362	215/2052	2.53e-06	7.88e-05	5.99e-05	RREB1/FOXP1/ZFHX4/MYCN/ACVR2A/CHD7/FOS/NFIB/YAP1/FZD4/MEF2A/MYB/NR2F2/SOX11/MAFB/MAF/MAFG/ACVR1/GLI2/MYBL1/NFIA/GATA2/CCNC/HIF1A/EN2/GATA6/INSIG1/NFYB/HOXA11/SSBP3/TBX3/NPAS2/TCF12/IRF2/THRB/HMGB1/ISL1/NR5A2/HDAC4/GREM1/SMAD5/IGF1/ASXL2/HOXA3/CNOT7/HOXB3/HOXA5/TBPL1/SETD3/RARB/FGFR1/NFE2L1/RAF1/ADCYAP1/ACTR2/SP3/HDAC2/CDC73/DPF3/DR1/ITGA6/SRF/TLX1/PITX2	64
GO:0051239	regulation of multicellular organismal process	78/362	279/2052	2.65e-06	8.11e-05	6.17e-05	ACVR2B/FOXP1/HDAC9/NOG/FLRT3/ACVR2A/BMP2/CHD7/FOS/NFIB/VEGFA/ZEB1/ZNF706/BMPR1B/ETS1/FZD4/MTMR2/NR2F2/PAFAH1B1/RGMA/THBS2/TSPAN12/H2AFY/INHBB/RBM24/MAFB/MAF/KIT/RAB14/ITGAV/MAFG/DDX6/ACVR1/NEUROD1/GATA2/CHRM2/SMAD6/GATA6/SEMA3A/HOXA11/CACNA1C/EPHA7/TCF12/NTF3/BMI1/SEMA4D/BTG1/HMGB1/ISL1/SNAP25/HDAC4/GREM1/KITLG/SMAD5/IGF1/DPYSL2/HOXA5/RECK/BCL2/RARB/BDNF/FGFR1/DSCAM/NDEL1/THY1/EPHA4/ARF6/CDC73/TF…	78
GO:0009892	negative regulation of metabolic process	83/362	304/2052	3.4e-06	0.000102025	7.77e-05	RREB1/FOXP1/HDAC9/TGIF1/ZFHX4/BMP2/LIN28B/NFIB/YAP1/ZEB1/ZNF706/MAFK/NR2F2/PAFAH1B1/SOX11/H2AFY/HOXC8/INHBB/COL6A3/YWHAB/RBM24/MAF/JARID2/CHMP4B/MIER1/DICER1/ITM2B/NFIA/PER2/GATA2/PTPRJ/PRKAR1A/SMAD6/CBFA2T3/GATA6/INSIG1/TBX3/RIMBP2/CAV1/BMI1/PNRC2/THRB/PI15/TRIM71/SEMA4D/ISL1/HDAC4/SPRY2/RCOR3/GREM1/SMAD5/CTDSPL/TARDBP/IGF1/CNOT7/HOXB3/CCND1/RECK/N4BP1/BCL2/RARB/CRIM1/FGFR1/PDCD4/IREB2/PDS5A/THY…	83
GO:0048598	embryonic morphogenesis	35/362	95/2052	3.84e-06	0.000113445	8.64e-05	ACVR2B/FLRT3/ACVR2A/CHD7/PDGFRA/SOBP/ALDH1A2/MAFB/COL2A1/ACVR1/HS2ST1/GATA2/PRKAR1A/RBPMS2/GATA6/INSIG1/HOXA11/TBX3/PHACTR4/BMI1/GREM1/IGF1/HOXA3/HSPA8/HOXB3/HOXA5/COL12A1/RECK/RARB/FGFR1/SP3/ZIC1/CDC73/NBL1/PITX2	35
GO:0045935	positive regulation of nucleobase-containing compound metabolic process	72/362	254/2052	4.08e-06	0.000118495	9.02e-05	RREB1/FOXP1/ZFHX4/MYCN/ACVR2A/CHD7/FOS/NFIB/YAP1/FZD4/MEF2A/MYB/NR2F2/SOX11/RBM24/MAFB/MAF/MAFG/ACVR1/GLI2/MYBL1/NFIA/GATA2/CCNC/RBPMS2/HIF1A/EN2/GATA6/INSIG1/NFYB/ARID5B/HOXA11/SSBP3/TBX3/NPAS2/TCF12/IRF2/THRB/HMGB1/ISL1/NR5A2/HDAC4/GREM1/EYA4/SMAD5/IGF1/ASXL2/HOXA3/CNOT7/HOXB3/HOXA5/TBPL1/EYA1/SETD3/RARB/FGFR1/NFE2L1/RAF1/ADCYAP1/ACTR2/SP3/EDF1/HDAC2/CDC73/TFRC/DPF3/DR1/ITGA6/SRF/TLX1/HABP4/PIT…	72
GO:0048562	embryonic organ morphogenesis	24/362	55/2052	4.8e-06	0.000136922	0.000104224	CHD7/PDGFRA/SOBP/ALDH1A2/MAFB/COL2A1/ACVR1/GATA2/RBPMS2/INSIG1/HOXA11/TBX3/PHACTR4/BMI1/IGF1/HOXA3/HOXB3/HOXA5/RARB/FGFR1/SP3/ZIC1/NBL1/PITX2	24
GO:0051246	regulation of protein metabolic process	75/362	269/2052	4.9e-06	0.000137625	0.000104759	MAGI3/QKI/ACVR2A/BMP2/PDGFRA/VEGFA/ZNF706/EIF4G2/FZD4/NR2F2/PAFAH1B1/H2AFY/INHBB/COL6A3/YWHAB/RBM24/KIT/JARID2/PPP1R12A/ACVR1/IGF2BP3/ITM2B/CCNL2/GATA2/CCNC/PTPRJ/PRKAR1A/RBPMS2/EN2/CDC42/STK4/CAV1/EPHA7/PHACTR4/BMI1/FGFR3/PI15/TRIM71/HMGB1/ISL1/RELN/HDAC4/SPRY2/GREM1/KITLG/CTDSPL/IGF1/CNOT7/CCNE1/CCND1/GHR/RECK/CCND2/N4BP1/BCL2/CRIM1/FGFR1/PDCD4/RAF1/WNT7B/IREB2/DCUN1D1/ADCYAP1/THY1/EPHA4/YWHAE/…	75
GO:0065009	regulation of molecular function	73/362	260/2052	5.11e-06	0.000140989	0.00010732	ACVR2A/RGS17/FZD4/NR2F2/PAFAH1B1/H2AFY/COL6A3/YWHAB/KIT/PPP1R12A/ACVR1/FNIP1/NF1/CCNL2/CCNC/PTPRJ/PRKAR1A/SMAD6/CDC42/ARID5B/CALD1/RIMBP2/HSPA5/DEPDC1B/ATP1B3/STK4/CAV1/EPHA7/PHACTR4/BMI1/FGFR3/PI15/SEMA4D/HMGB1/ISL1/RELN/HDAC4/SPRY2/GREM1/KITLG/IGF1/CCNE1/CCND1/RECK/CCND2/BCL2/USP7/CRIM1/FGFR1/PDCD4/KCNAB1/RAF1/DCUN1D1/ADCYAP1/NDEL1/RAN/THY1/EPHA4/YWHAE/ARF6/EDF1/TNFAIP8/PDGFC/ATP1B1/BCL6/SMAP2/…	73
GO:0051172	negative regulation of nitrogen compound metabolic process	74/362	265/2052	5.42e-06	0.000147173	0.000112027	RREB1/FOXP1/HDAC9/TGIF1/ZFHX4/BMP2/NFIB/YAP1/ZEB1/ZNF706/MAFK/NR2F2/PAFAH1B1/SOX11/H2AFY/HOXC8/INHBB/COL6A3/YWHAB/RBM24/MAF/JARID2/MIER1/ITM2B/NFIA/PER2/GATA2/PTPRJ/PRKAR1A/CBFA2T3/GATA6/TBX3/CAV1/BMI1/THRB/PI15/TRIM71/SEMA4D/ISL1/HDAC4/SPRY2/RCOR3/GREM1/SMAD5/CTDSPL/TARDBP/IGF1/CNOT7/HOXB3/CCND1/RECK/N4BP1/RARB/CRIM1/FGFR1/PDCD4/IREB2/PDS5A/THY1/EPHA4/YWHAE/SP3/GLI3/TNFAIP8/CDC73/FOXG1/DPF3/BCL6…	74
GO:0048812	neuron projection morphogenesis	32/362	86/2052	8.07e-06	0.000215858	0.000164309	FOXP1/FLRT3/NFIB/FZD4/PAFAH1B1/NRP1/ALCAM/GAP43/FARP1/EN2/CDC42/SEMA3A/VCL/EPHA7/NTF3/SEMA4D/ISL1/RELN/NEO1/DPYSL2/SGK1/BCL2/BDNF/DSCAM/NDEL1/THY1/EPHA4/NFASC/NTRK3/EPHA5/SEMA3D/RAB10	32
GO:0010646	regulation of cell communication	77/362	282/2052	8.56e-06	0.000218644	0.00016643	AFAP1/MAGI3/NOG/ACVR2A/BMP2/CHD7/CSNK1G1/PDGFRA/RGS17/ARHGEF3/FZD4/PAFAH1B1/SOX11/INHBB/YWHAB/KIT/COL2A1/ACVR1/PDIA3/GATA2/FARP1/RAP1B/PTPRJ/RBPMS2/CHRM2/SMAD6/INSIG1/CACNA1C/HSPA5/DEPDC1B/EPHA7/PHACTR4/NTF3/BMI1/FGFR3/HMGB1/ISL1/RELN/NEO1/SNAP25/GRB2/SPRY2/GREM1/KITLG/EYA4/IGF1/FRZB/APCDD1/CNOT7/CALB1/GHR/RECK/EYA1/BCL2/BDNF/SHOC2/RGS9BP/FGFR1/PDCD4/RAF1/SOCS3/WNT7B/ADCYAP1/THY1/EPHA4/ARF6/ZIC1/…	77
GO:0045944	positive regulation of transcription by RNA polymerase II	53/362	173/2052	8.45e-06	0.000218644	0.00016643	RREB1/FOXP1/MYCN/ACVR2A/CHD7/FOS/NFIB/YAP1/MEF2A/SOX11/MAFB/MAF/MAFG/ACVR1/NFIA/GATA2/CCNC/HIF1A/EN2/GATA6/INSIG1/SSBP3/TBX3/TCF12/IRF2/THRB/HMGB1/ISL1/NR5A2/HDAC4/GREM1/SMAD5/IGF1/ASXL2/HOXA3/CNOT7/HOXB3/HOXA5/TBPL1/SETD3/RARB/RAF1/ADCYAP1/ACTR2/SP3/HDAC2/CDC73/DPF3/DR1/ITGA6/SRF/TLX1/PITX2	53
GO:0070848	response to growth factor	33/362	90/2052	8.36e-06	0.000218644	0.00016643	ACVR2B/DNMT3A/NOG/FLRT3/ACVR2A/BMP2/FOS/VEGFA/BMPR1B/FZD4/RGMA/NRP1/RAB14/COL2A1/ACVR1/RBPMS2/SMAD6/GATA6/NTF3/FGFR3/TRIM71/NEO1/SPRY2/GREM1/SMAD5/BDNF/FGFR1/RAF1/TGFBR2/SKI/FGF4/NTRK3/SPRY1	33
GO:0000122	negative regulation of transcription by RNA polymerase II	35/362	98/2052	8.72e-06	0.000219477	0.000167064	RREB1/FOXP1/HDAC9/ZFHX4/BMP2/NFIB/MAFK/NR2F2/SOX11/H2AFY/HOXC8/MAF/MIER1/NFIA/PER2/GATA2/GATA6/TBX3/BMI1/THRB/SEMA4D/ISL1/HDAC4/SMAD5/CNOT7/HOXB3/CCND1/RARB/FGFR1/SP3/CDC73/BCL6/DR1/NR2E1/BRMS1L	35
GO:0007166	cell surface receptor signaling pathway	78/362	287/2052	8.94e-06	0.000221012	0.000168232	ACVR2B/PTCH1/NOG/FLRT3/ACVR2A/BMP2/CSNK1G1/FOS/PDGFRA/VEGFA/BMPR1B/FZD4/PAFAH1B1/RGMA/SOX11/TSPAN12/NRP1/INHBB/KIT/RAB14/ITGAV/COL2A1/ACVR1/PDIA3/FZD10/GATA2/PTPRJ/RBPMS2/SMAD6/SEMA3A/CACNA1C/DEPDC1B/EPHA7/PHACTR4/NTF3/FGFR3/TRIM71/SEMA4D/YES1/ISL1/NEO1/SPRY2/GREM1/KITLG/EYA4/SMAD5/IGF1/FRZB/FZD6/APCDD1/CNOT7/GHR/RECK/EYA1/BCL2/BDNF/FGFR1/RAF1/WNT7B/DSCAM/NDEL1/THY1/EPHA4/GLI3/FZD7/ZIC1/CDC73/CSN…	78
GO:0040011	locomotion	52/362	169/2052	9.04e-06	0.000221012	0.000168232	FOXP1/FN1/FLRT3/NFIB/PDGFRA/VEGFA/ETS1/FZD4/NR2F2/PAFAH1B1/NRP1/ALCAM/KIT/CHMP4B/GAP43/ACVR1/GATA2/EN2/SEMA3A/VCL/MYH9/PODXL/EPHA7/PHACTR4/SEMA4D/WDR1/HMGB1/ISL1/RELN/NEO1/GREM1/KITLG/IGF1/DPYSL2/HOXA5/RECK/BCL2/FGFR1/FAM60A/DSCAM/NDEL1/THY1/EPHA4/YWHAE/ARF6/PDGFC/NFASC/ITGA6/TGFBR2/NTRK3/EPHA5/SEMA3D	52
GO:0045859	regulation of protein kinase activity	29/362	75/2052	9.17e-06	0.000221012	0.000168232	FZD4/NR2F2/H2AFY/KIT/CCNL2/CCNC/PTPRJ/PRKAR1A/CDC42/STK4/CAV1/RELN/SPRY2/GREM1/KITLG/IGF1/CCNE1/CCND1/CCND2/FGFR1/PDCD4/RAF1/ADCYAP1/THY1/EPHA4/PDGFC/TAOK3/NTRK3/SPRY1	29
GO:0048858	cell projection morphogenesis	32/362	87/2052	1.07e-05	0.00024794	0.000188729	FOXP1/FLRT3/NFIB/FZD4/PAFAH1B1/NRP1/ALCAM/GAP43/FARP1/EN2/CDC42/SEMA3A/VCL/EPHA7/NTF3/SEMA4D/ISL1/RELN/NEO1/DPYSL2/SGK1/BCL2/BDNF/DSCAM/NDEL1/THY1/EPHA4/NFASC/NTRK3/EPHA5/SEMA3D/RAB10	32
GO:0071363	cellular response to growth factor stimulus	32/362	87/2052	1.07e-05	0.00024794	0.000188729	ACVR2B/NOG/FLRT3/ACVR2A/BMP2/FOS/VEGFA/BMPR1B/FZD4/RGMA/NRP1/RAB14/COL2A1/ACVR1/RBPMS2/SMAD6/GATA6/NTF3/FGFR3/TRIM71/NEO1/SPRY2/GREM1/SMAD5/BDNF/FGFR1/RAF1/TGFBR2/SKI/FGF4/NTRK3/SPRY1	32
GO:0120039	plasma membrane bounded cell projection morphogenesis	32/362	87/2052	1.07e-05	0.00024794	0.000188729	FOXP1/FLRT3/NFIB/FZD4/PAFAH1B1/NRP1/ALCAM/GAP43/FARP1/EN2/CDC42/SEMA3A/VCL/EPHA7/NTF3/SEMA4D/ISL1/RELN/NEO1/DPYSL2/SGK1/BCL2/BDNF/DSCAM/NDEL1/THY1/EPHA4/NFASC/NTRK3/EPHA5/SEMA3D/RAB10	32
GO:0043412	macromolecule modification	110/362	446/2052	1.32e-05	0.000294703	0.000224325	ACVR2B/MGAT4A/AFAP1/CTDSPL2/DNMT3A/HDAC9/MAGI3/USP47/ACVR2A/BMP2/CSNK1G1/PDGFRA/VEGFA/YAP1/BMPR1B/FZD4/MTMR2/NR2F2/PAFAH1B1/UBE2F/CLOCK/H2AFY/INHBB/YWHAB/USP48/KIT/JARID2/MIER1/WIPI2/PPP1R12A/ABHD13/SKP1/ACVR1/PPP1CB/PCMTD1/USP28/CCNL2/GATA2/CCNC/PTPRJ/PRKAR1A/RBPMS2/DYRK2/CDC42/STK4/CAV1/EPHA7/PHACTR4/USP37/BMI1/FGFR3/TRIM71/YES1/HMGB1/RPS6KA5/ISL1/RELN/HDAC4/SPRY2/GREM1/KITLG/EYA4/UBE2V1/SMAD5/…	110
GO:0010605	negative regulation of macromolecule metabolic process	77/362	285/2052	1.33e-05	0.000294703	0.000224325	RREB1/FOXP1/HDAC9/TGIF1/ZFHX4/BMP2/LIN28B/NFIB/YAP1/ZEB1/ZNF706/MAFK/NR2F2/PAFAH1B1/SOX11/H2AFY/HOXC8/INHBB/COL6A3/YWHAB/RBM24/MAF/JARID2/MIER1/DICER1/ITM2B/NFIA/PER2/GATA2/PTPRJ/PRKAR1A/CBFA2T3/GATA6/TBX3/CAV1/BMI1/PNRC2/THRB/PI15/TRIM71/SEMA4D/ISL1/HDAC4/SPRY2/RCOR3/GREM1/SMAD5/CTDSPL/TARDBP/IGF1/CNOT7/HOXB3/CCND1/RECK/N4BP1/RARB/CRIM1/FGFR1/PDCD4/IREB2/PDS5A/THY1/EPHA4/YWHAE/SP3/GLI3/TNFAIP8/C…	77
GO:0043549	regulation of kinase activity	30/362	80/2052	1.32e-05	0.000294703	0.000224325	FZD4/NR2F2/H2AFY/KIT/CCNL2/CCNC/PTPRJ/PRKAR1A/CDC42/STK4/CAV1/FGFR3/RELN/SPRY2/GREM1/KITLG/IGF1/CCNE1/CCND1/CCND2/FGFR1/PDCD4/RAF1/ADCYAP1/THY1/EPHA4/PDGFC/TAOK3/NTRK3/SPRY1	30
GO:0050790	regulation of catalytic activity	62/362	216/2052	1.42e-05	0.000312694	0.00023802	ACVR2A/RGS17/FZD4/NR2F2/PAFAH1B1/H2AFY/COL6A3/YWHAB/KIT/PPP1R12A/ACVR1/FNIP1/NF1/CCNL2/CCNC/PTPRJ/PRKAR1A/SMAD6/CDC42/CALD1/RIMBP2/DEPDC1B/ATP1B3/STK4/CAV1/EPHA7/PHACTR4/BMI1/FGFR3/PI15/SEMA4D/RELN/SPRY2/GREM1/KITLG/IGF1/CCNE1/CCND1/RECK/CCND2/BCL2/CRIM1/FGFR1/PDCD4/RAF1/DCUN1D1/ADCYAP1/NDEL1/THY1/EPHA4/TNFAIP8/PDGFC/ATP1B1/BCL6/SMAP2/ITGA6/TAOK3/RCAN3/NTRK3/EPHA5/PPP2R2D/SPRY1	62
GO:0009968	negative regulation of signal transduction	35/362	100/2052	1.46e-05	0.000317001	0.000241298	NOG/RGS17/PAFAH1B1/YWHAB/COL2A1/ACVR1/GATA2/PTPRJ/RBPMS2/SMAD6/INSIG1/HSPA5/PHACTR4/BMI1/ISL1/SPRY2/GREM1/EYA4/IGF1/FRZB/APCDD1/CNOT7/EYA1/BCL2/RGS9BP/PDCD4/RAF1/SOCS3/THY1/CSNK1A1/BCL6/ITGA6/TAOK3/SKI/SPRY1	35
GO:0009966	regulation of signal transduction	70/362	253/2052	1.49e-05	0.000318092	0.000242128	AFAP1/MAGI3/NOG/ACVR2A/BMP2/CSNK1G1/PDGFRA/RGS17/ARHGEF3/FZD4/PAFAH1B1/SOX11/INHBB/YWHAB/KIT/COL2A1/ACVR1/PDIA3/GATA2/FARP1/PTPRJ/RBPMS2/SMAD6/INSIG1/CACNA1C/HSPA5/DEPDC1B/EPHA7/PHACTR4/BMI1/FGFR3/HMGB1/ISL1/RELN/NEO1/GRB2/SPRY2/GREM1/KITLG/EYA4/IGF1/FRZB/APCDD1/CNOT7/GHR/RECK/EYA1/BCL2/SHOC2/RGS9BP/FGFR1/PDCD4/RAF1/SOCS3/WNT7B/ADCYAP1/THY1/EPHA4/ARF6/ZIC1/CDC73/CSNK1A1/PDGFC/BCL6/ITGA6/TAOK3/RCA…	70
GO:0007389	pattern specification process	28/362	73/2052	1.58e-05	0.000333689	0.000254001	ACVR2B/NOG/ACVR2A/ALDH1A2/BMPR1B/NR2F2/HOXC8/INHBB/MAFB/ACVR1/HAND2/HOXA11/TBX3/BMI1/ISL1/RELN/GREM1/HOXA3/HOXB3/HOXA5/FGFR1/WNT7B/EPHA4/GLI3/ZIC1/TGFBR2/PITX2/SPRY1	28
GO:0010557	positive regulation of macromolecule biosynthetic process	69/362	249/2052	1.64e-05	0.000342087	0.000260394	RREB1/FOXP1/ZFHX4/MYCN/ACVR2A/CHD7/FOS/NFIB/YAP1/FZD4/MEF2A/MYB/NR2F2/SOX11/MAFB/MAF/MAFG/ACVR1/GLI2/MYBL1/NFIA/GATA2/CCNC/RBPMS2/DYRK2/HIF1A/EN2/GATA6/INSIG1/NFYB/ARID5B/HOXA11/SSBP3/TBX3/NPAS2/TCF12/IRF2/THRB/HMGB1/ISL1/NR5A2/HDAC4/GREM1/SMAD5/IGF1/ASXL2/HOXA3/CNOT7/HOXB3/HOXA5/TBPL1/SETD3/RARB/FGFR1/NFE2L1/RAF1/ADCYAP1/ACTR2/SP3/EDF1/HDAC2/CDC73/DPF3/DR1/ITGA6/SRF/TLX1/HABP4/PITX2	69
GO:0023051	regulation of signaling	77/362	287/2052	1.76e-05	0.000359187	0.00027341	AFAP1/MAGI3/NOG/ACVR2A/BMP2/CHD7/CSNK1G1/PDGFRA/RGS17/ARHGEF3/FZD4/PAFAH1B1/SOX11/INHBB/YWHAB/KIT/COL2A1/ACVR1/PDIA3/GATA2/FARP1/RAP1B/PTPRJ/RBPMS2/CHRM2/SMAD6/INSIG1/CACNA1C/HSPA5/DEPDC1B/EPHA7/PHACTR4/NTF3/BMI1/FGFR3/HMGB1/ISL1/RELN/NEO1/SNAP25/GRB2/SPRY2/GREM1/KITLG/EYA4/IGF1/FRZB/APCDD1/CNOT7/CALB1/GHR/RECK/EYA1/BCL2/BDNF/SHOC2/RGS9BP/FGFR1/PDCD4/RAF1/SOCS3/WNT7B/ADCYAP1/THY1/EPHA4/ARF6/ZIC1/…	77
GO:0060429	epithelium development	39/362	117/2052	1.75e-05	0.000359187	0.00027341	FOXP1/NOG/FLRT3/CHD7/NFIB/ALDH1A2/NR2F2/PAFAH1B1/H2AFY/MAF/MAFG/COL2A1/ACVR1/HS2ST1/GATA6/CDC42/HOXA11/VCL/TBX3/PODXL/ETS2/EPHA7/PHACTR4/BMI1/THRB/TRIM71/BTG1/GREM1/SMAD5/CALB1/HOXA5/BCL2/RARB/FGFR1/WNT7B/EPHA4/NTRK3/PITX2/RAB10	39
GO:0048666	neuron development	43/362	134/2052	1.86e-05	0.000370547	0.000282057	FOXP1/FLRT3/NFIB/FZD4/MTMR2/PAFAH1B1/RGMA/NRP1/ALCAM/GAP43/NEUROD1/GATA2/FARP1/EN2/CDC42/SEMA3A/VCL/EPHA7/NTF3/SEMA4D/ISL1/RELN/NEO1/SNAP25/DPYSL2/SGK1/BCL2/BDNF/FGFR1/DSCAM/ADCYAP1/NDEL1/THY1/EPHA4/ARF6/NFASC/ITGA6/VSX1/SKI/NTRK3/EPHA5/SEMA3D/RAB10	43
GO:0032990	cell part morphogenesis	32/362	89/2052	1.85e-05	0.000370547	0.000282057	FOXP1/FLRT3/NFIB/FZD4/PAFAH1B1/NRP1/ALCAM/GAP43/FARP1/EN2/CDC42/SEMA3A/VCL/EPHA7/NTF3/SEMA4D/ISL1/RELN/NEO1/DPYSL2/SGK1/BCL2/BDNF/DSCAM/NDEL1/THY1/EPHA4/NFASC/NTRK3/EPHA5/SEMA3D/RAB10	32
GO:0030182	neuron differentiation	52/362	173/2052	1.92e-05	0.000377132	0.000287069	FOXP1/FLRT3/NFIB/ZEB1/ALDH1A2/FZD4/MTMR2/PAFAH1B1/RGMA/SOX11/NRP1/HOXC8/ALCAM/GAP43/DDX6/NEUROD1/GATA2/FARP1/SMAD6/EN2/CDC42/SEMA3A/VCL/EPHA7/TCF12/NTF3/SEMA4D/ISL1/RELN/NEO1/SNAP25/DPYSL2/SGK1/BCL2/RARB/BDNF/FGFR1/WNT7B/DSCAM/ADCYAP1/NDEL1/THY1/EPHA4/ARF6/NFASC/ITGA6/VSX1/SKI/NTRK3/EPHA5/SEMA3D/RAB10	52
GO:0048699	generation of neurons	56/362	191/2052	2e-05	0.000390034	0.00029689	FOXP1/FLRT3/CHD7/NFIB/ZEB1/ALDH1A2/FZD4/MTMR2/NR2F2/PAFAH1B1/RGMA/SOX11/NRP1/HOXC8/ALCAM/GAP43/DDX6/NEUROD1/GATA2/FARP1/SMAD6/EN2/CDC42/SEMA3A/VCL/EPHA7/TCF12/NTF3/SEMA4D/ISL1/RELN/NEO1/SNAP25/IGF1/DPYSL2/SGK1/BCL2/RARB/BDNF/FGFR1/WNT7B/DSCAM/ADCYAP1/NDEL1/THY1/EPHA4/YWHAE/ARF6/NFASC/ITGA6/VSX1/SKI/NTRK3/EPHA5/SEMA3D/RAB10	56
GO:0001501	skeletal system development	34/362	98/2052	2.42e-05	0.000461137	0.000351013	NOG/ACVR2A/BMP2/CHD7/NFIB/PDGFRA/BMPR1B/HAPLN1/PAFAH1B1/HOXC8/COL6A3/MAF/KIT/COL2A1/SMAD6/INSIG1/HOXA11/TBX3/BMI1/SEMA4D/HDAC4/GREM1/SMAD5/IGF1/HOXA3/HOXB3/HOXA5/COL12A1/RARB/FGFR1/SP3/PDGFC/RAB33B/TAPT1	34
GO:0051338	regulation of transferase activity	32/362	90/2052	2.41e-05	0.000461137	0.000351013	FZD4/NR2F2/H2AFY/KIT/CCNL2/CCNC/PTPRJ/PRKAR1A/CDC42/STK4/CAV1/BMI1/FGFR3/RELN/SPRY2/GREM1/KITLG/IGF1/CCNE1/CCND1/CCND2/FGFR1/PDCD4/RAF1/DCUN1D1/ADCYAP1/THY1/EPHA4/PDGFC/TAOK3/NTRK3/SPRY1	32
GO:1902679	negative regulation of RNA biosynthetic process	47/362	153/2052	2.71e-05	0.000504229	0.000383814	RREB1/FOXP1/HDAC9/TGIF1/ZFHX4/BMP2/NFIB/YAP1/ZEB1/ZNF706/MAFK/NR2F2/SOX11/H2AFY/HOXC8/MAF/JARID2/MIER1/NFIA/PER2/GATA2/CBFA2T3/GATA6/TBX3/BMI1/THRB/SEMA4D/ISL1/HDAC4/RCOR3/GREM1/SMAD5/CNOT7/HOXB3/CCND1/RARB/FGFR1/PDCD4/SP3/GLI3/CDC73/FOXG1/DPF3/BCL6/DR1/NR2E1/BRMS1L	47
GO:1903507	negative regulation of nucleic acid-templated transcription	47/362	153/2052	2.71e-05	0.000504229	0.000383814	RREB1/FOXP1/HDAC9/TGIF1/ZFHX4/BMP2/NFIB/YAP1/ZEB1/ZNF706/MAFK/NR2F2/SOX11/H2AFY/HOXC8/MAF/JARID2/MIER1/NFIA/PER2/GATA2/CBFA2T3/GATA6/TBX3/BMI1/THRB/SEMA4D/ISL1/HDAC4/RCOR3/GREM1/SMAD5/CNOT7/HOXB3/CCND1/RARB/FGFR1/PDCD4/SP3/GLI3/CDC73/FOXG1/DPF3/BCL6/DR1/NR2E1/BRMS1L	47
GO:0010648	negative regulation of cell communication	37/362	111/2052	2.92e-05	0.000531605	0.000404652	NOG/RGS17/PAFAH1B1/INHBB/YWHAB/COL2A1/ACVR1/GATA2/RAP1B/PTPRJ/RBPMS2/SMAD6/INSIG1/HSPA5/PHACTR4/BMI1/ISL1/SPRY2/GREM1/EYA4/IGF1/FRZB/APCDD1/CNOT7/EYA1/BCL2/RGS9BP/PDCD4/RAF1/SOCS3/THY1/CSNK1A1/BCL6/ITGA6/TAOK3/SKI/SPRY1	37
GO:0023057	negative regulation of signaling	37/362	111/2052	2.92e-05	0.000531605	0.000404652	NOG/RGS17/PAFAH1B1/INHBB/YWHAB/COL2A1/ACVR1/GATA2/RAP1B/PTPRJ/RBPMS2/SMAD6/INSIG1/HSPA5/PHACTR4/BMI1/ISL1/SPRY2/GREM1/EYA4/IGF1/FRZB/APCDD1/CNOT7/EYA1/BCL2/RGS9BP/PDCD4/RAF1/SOCS3/THY1/CSNK1A1/BCL6/ITGA6/TAOK3/SKI/SPRY1	37
GO:0031327	negative regulation of cellular biosynthetic process	55/362	189/2052	3.06e-05	0.000552207	0.000420335	RREB1/FOXP1/HDAC9/TGIF1/ZFHX4/BMP2/NFIB/YAP1/ZEB1/ZNF706/MAFK/NR2F2/SOX11/H2AFY/HOXC8/INHBB/RBM24/MAF/JARID2/MIER1/ITM2B/NFIA/PER2/GATA2/CBFA2T3/GATA6/INSIG1/TBX3/BMI1/THRB/TRIM71/SEMA4D/ISL1/HDAC4/RCOR3/GREM1/SMAD5/CNOT7/HOXB3/CCND1/RARB/FGFR1/PDCD4/IREB2/PDS5A/SP3/GLI3/CDC73/FOXG1/MAEA/DPF3/BCL6/DR1/NR2E1/BRMS1L	55
GO:0009890	negative regulation of biosynthetic process	55/362	190/2052	3.63e-05	0.000646681	0.000492248	RREB1/FOXP1/HDAC9/TGIF1/ZFHX4/BMP2/NFIB/YAP1/ZEB1/ZNF706/MAFK/NR2F2/SOX11/H2AFY/HOXC8/INHBB/RBM24/MAF/JARID2/MIER1/ITM2B/NFIA/PER2/GATA2/CBFA2T3/GATA6/INSIG1/TBX3/BMI1/THRB/TRIM71/SEMA4D/ISL1/HDAC4/RCOR3/GREM1/SMAD5/CNOT7/HOXB3/CCND1/RARB/FGFR1/PDCD4/IREB2/PDS5A/SP3/GLI3/CDC73/FOXG1/MAEA/DPF3/BCL6/DR1/NR2E1/BRMS1L	55
GO:0022008	neurogenesis	56/362	195/2052	3.93e-05	0.000694211	0.000528426	FOXP1/FLRT3/CHD7/NFIB/ZEB1/ALDH1A2/FZD4/MTMR2/NR2F2/PAFAH1B1/RGMA/SOX11/NRP1/HOXC8/ALCAM/GAP43/DDX6/NEUROD1/GATA2/FARP1/SMAD6/EN2/CDC42/SEMA3A/VCL/EPHA7/TCF12/NTF3/SEMA4D/ISL1/RELN/NEO1/SNAP25/IGF1/DPYSL2/SGK1/BCL2/RARB/BDNF/FGFR1/WNT7B/DSCAM/ADCYAP1/NDEL1/THY1/EPHA4/YWHAE/ARF6/NFASC/ITGA6/VSX1/SKI/NTRK3/EPHA5/SEMA3D/RAB10	56
GO:0051253	negative regulation of RNA metabolic process	49/362	164/2052	4.11e-05	0.000718817	0.000547157	RREB1/FOXP1/HDAC9/TGIF1/ZFHX4/BMP2/NFIB/YAP1/ZEB1/ZNF706/MAFK/NR2F2/SOX11/H2AFY/HOXC8/RBM24/MAF/JARID2/MIER1/NFIA/PER2/GATA2/CBFA2T3/GATA6/TBX3/BMI1/THRB/SEMA4D/ISL1/HDAC4/RCOR3/GREM1/SMAD5/TARDBP/CNOT7/HOXB3/CCND1/RARB/FGFR1/PDCD4/SP3/GLI3/CDC73/FOXG1/DPF3/BCL6/DR1/NR2E1/BRMS1L	49
GO:0010558	negative regulation of macromolecule biosynthetic process	53/362	182/2052	4.28e-05	0.000739407	0.000562829	RREB1/FOXP1/HDAC9/TGIF1/ZFHX4/BMP2/NFIB/YAP1/ZEB1/ZNF706/MAFK/NR2F2/SOX11/H2AFY/HOXC8/INHBB/RBM24/MAF/JARID2/MIER1/ITM2B/NFIA/PER2/GATA2/CBFA2T3/GATA6/TBX3/BMI1/THRB/TRIM71/SEMA4D/ISL1/HDAC4/RCOR3/GREM1/SMAD5/CNOT7/HOXB3/CCND1/RARB/FGFR1/PDCD4/IREB2/PDS5A/SP3/GLI3/CDC73/FOXG1/DPF3/BCL6/DR1/NR2E1/BRMS1L	53
GO:0031175	neuron projection development	38/362	117/2052	4.4e-05	0.000752885	0.000573088	FOXP1/FLRT3/NFIB/FZD4/PAFAH1B1/RGMA/NRP1/ALCAM/GAP43/FARP1/EN2/CDC42/SEMA3A/VCL/EPHA7/NTF3/SEMA4D/ISL1/RELN/NEO1/SNAP25/DPYSL2/SGK1/BCL2/BDNF/FGFR1/DSCAM/ADCYAP1/NDEL1/THY1/EPHA4/ARF6/NFASC/ITGA6/NTRK3/EPHA5/SEMA3D/RAB10	38
GO:0007167	enzyme linked receptor protein signaling pathway	42/362	134/2052	4.46e-05	0.000755593	0.00057515	ACVR2B/NOG/FLRT3/ACVR2A/BMP2/FOS/PDGFRA/VEGFA/BMPR1B/FZD4/RGMA/NRP1/INHBB/KIT/RAB14/ACVR1/PTPRJ/RBPMS2/SMAD6/EPHA7/NTF3/FGFR3/TRIM71/YES1/NEO1/SPRY2/GREM1/SMAD5/IGF1/GHR/BDNF/FGFR1/RAF1/NDEL1/EPHA4/PDGFC/TGFBR2/SKI/FGF4/NTRK3/EPHA5/SPRY1	42
GO:0043405	regulation of MAP kinase activity	14/362	27/2052	4.85e-05	0.000813276	0.000619058	FZD4/KIT/PTPRJ/SPRY2/KITLG/IGF1/FGFR1/PDCD4/RAF1/EPHA4/PDGFC/TAOK3/NTRK3/SPRY1	14
GO:0031328	positive regulation of cellular biosynthetic process	69/362	257/2052	5.26e-05	0.000875095	0.000666114	RREB1/FOXP1/ZFHX4/MYCN/ACVR2A/CHD7/FOS/NFIB/YAP1/FZD4/MEF2A/MYB/NR2F2/SOX11/MAFB/MAF/MAFG/ACVR1/GLI2/MYBL1/NFIA/GATA2/CCNC/RBPMS2/DYRK2/HIF1A/EN2/GATA6/INSIG1/NFYB/ARID5B/HOXA11/SSBP3/TBX3/NPAS2/TCF12/IRF2/THRB/HMGB1/ISL1/NR5A2/HDAC4/GREM1/SMAD5/IGF1/ASXL2/HOXA3/CNOT7/HOXB3/HOXA5/TBPL1/SETD3/RARB/FGFR1/NFE2L1/RAF1/ADCYAP1/ACTR2/SP3/EDF1/HDAC2/CDC73/DPF3/DR1/ITGA6/SRF/TLX1/HABP4/PITX2	69
GO:0006928	movement of cell or subcellular component	54/362	188/2052	5.49e-05	0.000904138	0.000688221	FOXP1/FN1/FLRT3/NFIB/VEGFA/ETS1/GJA1/NR2F2/PAFAH1B1/NRP1/ALCAM/KIT/GAP43/ACVR1/GATA2/ACTC1/EN2/SEMA3A/VCL/MYH9/PODXL/EPHA7/PHACTR4/SEMA4D/HMGB1/ISL1/RELN/NEO1/GREM1/KITLG/IGF1/HSPA8/DPYSL2/HOXA5/RECK/BCL2/FGFR1/FAM60A/KIF2A/DSCAM/ARL8A/NDEL1/THY1/EPHA4/YWHAE/ARF6/PDGFC/BCL6/NFASC/ITGA6/TGFBR2/NTRK3/EPHA5/SEMA3D	54
GO:0010563	negative regulation of phosphorus metabolic process	19/362	44/2052	5.84e-05	0.000942671	0.000717552	NR2F2/PAFAH1B1/H2AFY/YWHAB/PTPRJ/PRKAR1A/SMAD6/RIMBP2/CAV1/SEMA4D/HDAC4/SPRY2/CTDSPL/PDCD4/THY1/YWHAE/TAOK3/NTRK3/SPRY1	19
GO:0045936	negative regulation of phosphate metabolic process	19/362	44/2052	5.84e-05	0.000942671	0.000717552	NR2F2/PAFAH1B1/H2AFY/YWHAB/PTPRJ/PRKAR1A/SMAD6/RIMBP2/CAV1/SEMA4D/HDAC4/SPRY2/CTDSPL/PDCD4/THY1/YWHAE/TAOK3/NTRK3/SPRY1	19
GO:0071495	cellular response to endogenous stimulus	46/362	153/2052	6.12e-05	0.000978991	0.000745198	ACVR2B/NOG/FLRT3/ACVR2A/BMP2/FOS/BMPR1B/NR2F2/RGMA/INHBB/KIT/RAB14/COL2A1/ESR1/ACVR1/RAP1B/RBPMS2/CHRM2/SMAD6/GATA6/MYO5A/NTF3/THRB/FGFR3/TRIM71/NEO1/NR5A2/SPRY2/GREM1/SMAD5/IGF1/GHR/RARB/BDNF/FGFR1/GABRG2/NDEL1/EPHA4/PDGFC/NR2E1/TGFBR2/SKI/FGF4/NTRK3/RAB10/SPRY1	46
GO:0045664	regulation of neuron differentiation	27/362	74/2052	6.41e-05	0.00101582	0.000773234	ZEB1/FZD4/PAFAH1B1/RGMA/DDX6/NEUROD1/GATA2/SMAD6/SEMA3A/EPHA7/TCF12/NTF3/SEMA4D/ISL1/SNAP25/DPYSL2/BCL2/BDNF/FGFR1/DSCAM/NDEL1/THY1/EPHA4/ARF6/ITGA6/NTRK3/SEMA3D	27
GO:0051093	negative regulation of developmental process	31/362	90/2052	6.64e-05	0.00104215	0.000793276	FOXP1/NOG/NFIB/ZNF706/MTMR2/RGMA/THBS2/MAFB/DDX6/GATA2/RBPMS2/SMAD6/INSIG1/SEMA3A/TBX3/EPHA7/SEMA4D/ISL1/HDAC4/GREM1/IGF1/HOXA5/BCL2/RARB/FAM60A/THY1/EPHA4/CDC73/BCL6/SKI/SEMA3D	31
GO:0043583	ear development	15/362	31/2052	7.33e-05	0.00114075	0.000868326	CHD7/SOBP/PAFAH1B1/MAFB/MAF/COL2A1/GATA2/INSIG1/IGF1/BCL2/RARB/FGFR1/EPHA4/ZIC1/NBL1	15
GO:2001236	regulation of extrinsic apoptotic signaling pathway	10/362	16/2052	7.61e-05	0.00117318	0.000893016	COL2A1/ACVR1/PDIA3/EYA4/IGF1/EYA1/BCL2/FGFR1/RAF1/ITGA6	10
GO:0045892	negative regulation of transcription, DNA-templated	45/362	150/2052	7.87e-05	0.00120323	0.000915883	RREB1/FOXP1/HDAC9/TGIF1/ZFHX4/BMP2/NFIB/ZEB1/ZNF706/MAFK/NR2F2/SOX11/H2AFY/HOXC8/MAF/JARID2/MIER1/NFIA/PER2/GATA2/CBFA2T3/GATA6/TBX3/BMI1/THRB/SEMA4D/ISL1/HDAC4/GREM1/SMAD5/CNOT7/HOXB3/CCND1/RARB/FGFR1/PDCD4/SP3/GLI3/CDC73/FOXG1/DPF3/BCL6/DR1/NR2E1/BRMS1L	45
GO:0007417	central nervous system development	33/362	99/2052	8.11e-05	0.00122815	0.000934855	FOXP1/CHD7/NFIB/ALDH1A2/FZD4/HAPLN1/NR2F2/PAFAH1B1/NRP1/MAFB/COL2A1/GATA2/SMAD6/EN2/TBX3/EPHA7/BMI1/ISL1/RELN/LRP8/DPYSL2/BCL2/RARB/FGFR1/WNT7B/RAB18/NDEL1/EPHA4/YWHAE/ZIC1/ARCN1/VLDLR/EPHA5	33
GO:0045596	negative regulation of cell differentiation	26/362	71/2052	8.19e-05	0.00123013	0.000936364	FOXP1/NOG/RGMA/MAFB/DDX6/GATA2/RBPMS2/SMAD6/INSIG1/SEMA3A/TBX3/EPHA7/SEMA4D/ISL1/HDAC4/GREM1/IGF1/HOXA5/BCL2/RARB/FAM60A/THY1/EPHA4/CDC73/SKI/SEMA3D	26
GO:0048646	anatomical structure formation involved in morphogenesis	44/362	146/2052	8.44e-05	0.00123156	0.000937448	ACVR2B/FOXP1/ACVR2A/NFIB/VEGFA/ETS1/MTMR2/PAFAH1B1/THBS2/TSPAN12/NRP1/MAFB/ITGAV/COL2A1/ACVR1/HS2ST1/GATA2/PRKAR1A/HAND2/GATA6/HOXA11/MYH9/PODXL/ETS2/SAT1/PHACTR4/WDR1/BTG1/ISL1/CSRP2/GREM1/IGF1/CALB1/HOXA5/TBPL1/COL12A1/RECK/FGFR1/DSCAM/THY1/EPHA4/CDC73/BCL6/SPRY1	44
GO:0007265	Ras protein signal transduction	19/362	45/2052	8.49e-05	0.00123156	0.000937448	ARHGEF3/RAB14/USP28/FARP1/RAP1B/CDC42/PHACTR4/SPRY2/KITLG/IGF1/SHOC2/RAB18/ARF6/BCL6/RAB33B/RAB6A/RAB5C/RAB10/SPRY1	19
GO:0007411	axon guidance	19/362	45/2052	8.49e-05	0.00123156	0.000937448	FOXP1/FLRT3/NFIB/NRP1/ALCAM/GAP43/EN2/SEMA3A/EPHA7/SEMA4D/ISL1/RELN/NEO1/DPYSL2/DSCAM/EPHA4/NFASC/EPHA5/SEMA3D	19
GO:0097485	neuron projection guidance	19/362	45/2052	8.49e-05	0.00123156	0.000937448	FOXP1/FLRT3/NFIB/NRP1/ALCAM/GAP43/EN2/SEMA3A/EPHA7/SEMA4D/ISL1/RELN/NEO1/DPYSL2/DSCAM/EPHA4/NFASC/EPHA5/SEMA3D	19
GO:0071310	cellular response to organic substance	61/362	223/2052	8.61e-05	0.00123881	0.000942967	ACVR2B/NOG/FLRT3/ACVR2A/BMP2/FOS/VEGFA/BMPR1B/FZD4/NR2F2/PAFAH1B1/RGMA/NRP1/INHBB/KIT/RAB14/COL2A1/ESR1/ACVR1/PDIA3/RAP1B/RBPMS2/CHRM2/SMAD6/GATA6/INSIG1/HSPA5/MYO5A/NTF3/THRB/FGFR3/TRIM71/NEO1/NR5A2/SPRY2/GREM1/SMAD5/IGF1/HSPA8/CNOT7/CALB1/GHR/BCL2/RARB/BDNF/FGFR1/RAF1/WNT7B/GABRG2/NDEL1/EPHA4/CDC73/PDGFC/NR2E1/TGFBR2/SKI/FGF4/NTRK3/IL17RD/RAB10/SPRY1	61
GO:2001237	negative regulation of extrinsic apoptotic signaling pathway	8/362	11/2052	8.8e-05	0.00125545	0.000955636	COL2A1/ACVR1/EYA4/IGF1/EYA1/BCL2/RAF1/ITGA6	8
GO:0009891	positive regulation of biosynthetic process	69/362	261/2052	9.1e-05	0.00128779	0.000980257	RREB1/FOXP1/ZFHX4/MYCN/ACVR2A/CHD7/FOS/NFIB/YAP1/FZD4/MEF2A/MYB/NR2F2/SOX11/MAFB/MAF/MAFG/ACVR1/GLI2/MYBL1/NFIA/GATA2/CCNC/RBPMS2/DYRK2/HIF1A/EN2/GATA6/INSIG1/NFYB/ARID5B/HOXA11/SSBP3/TBX3/NPAS2/TCF12/IRF2/THRB/HMGB1/ISL1/NR5A2/HDAC4/GREM1/SMAD5/IGF1/ASXL2/HOXA3/CNOT7/HOXB3/HOXA5/TBPL1/SETD3/RARB/FGFR1/NFE2L1/RAF1/ADCYAP1/ACTR2/SP3/EDF1/HDAC2/CDC73/DPF3/DR1/ITGA6/SRF/TLX1/HABP4/PITX2	69
GO:0048729	tissue morphogenesis	30/362	88/2052	0.000108795	0.0015267	0.00116211	ACVR2B/FLRT3/ACVR2A/CHD7/ALDH1A2/PAFAH1B1/NRP1/COL6A3/ACVR1/HS2ST1/PRKAR1A/CDC42/HOXA11/VCL/TBX3/PODXL/ETS2/EPHA7/PHACTR4/ISL1/ACTA2/GREM1/IGF1/HOXA5/COL12A1/BCL2/FGFR1/EPHA4/PITX2/RAB10	30
GO:0022603	regulation of anatomical structure morphogenesis	33/362	101/2052	0.00012664	0.00174844	0.0013309	FN1/NFIB/VEGFA/ETS1/FZD4/PAFAH1B1/THBS2/TSPAN12/KIT/ACVR1/NEUROD1/GATA2/GATA6/CDC42/SEMA3A/HOXA11/MYH9/EPHA7/SEMA4D/BTG1/ISL1/GREM1/DPYSL2/HOXA5/RECK/BCL2/FGFR1/DSCAM/THY1/EPHA4/NTRK3/SEMA3D/SPRY1	33
GO:0060284	regulation of cell development	33/362	101/2052	0.00012664	0.00174844	0.0013309	HDAC9/CHD7/ZEB1/FZD4/PAFAH1B1/RGMA/DDX6/NEUROD1/GATA2/SMAD6/SEMA3A/HOXA11/EPHA7/TCF12/NTF3/SEMA4D/ISL1/SNAP25/HDAC4/IGF1/DPYSL2/RECK/BCL2/BDNF/FGFR1/DSCAM/NDEL1/THY1/EPHA4/ARF6/ITGA6/NTRK3/SEMA3D	33
GO:0000082	G1/S transition of mitotic cell cycle	9/362	14/2052	0.000131373	0.00179929	0.0013696	ACVR1/USP37/TRIM71/CTDSPL/CCNE1/CCND1/CCND2/BCL2/CDC73	9
GO:0048839	inner ear development	14/362	29/2052	0.000132755	0.00180378	0.00137302	CHD7/SOBP/PAFAH1B1/MAFB/MAF/COL2A1/GATA2/INSIG1/IGF1/RARB/FGFR1/EPHA4/ZIC1/NBL1	14
GO:0007264	small GTPase mediated signal transduction	20/362	50/2052	0.00013736	0.00182296	0.00138762	ARHGEF3/RAB14/USP28/FARP1/RAP1B/CDC42/PHACTR4/RELN/SPRY2/KITLG/IGF1/SHOC2/RAB18/ARF6/BCL6/RAB33B/RAB6A/RAB5C/RAB10/SPRY1	20
GO:0040017	positive regulation of locomotion	20/362	50/2052	0.00013736	0.00182296	0.00138762	VEGFA/ETS1/KIT/CHMP4B/ACVR1/GATA2/SEMA3A/PODXL/SEMA4D/KITLG/IGF1/BCL2/FGFR1/DSCAM/ARF6/PDGFC/ITGA6/TGFBR2/NTRK3/SEMA3D	20
GO:0051272	positive regulation of cellular component movement	20/362	50/2052	0.00013736	0.00182296	0.00138762	VEGFA/ETS1/KIT/ACVR1/GATA2/SEMA3A/PODXL/SEMA4D/KITLG/IGF1/BCL2/FGFR1/DSCAM/ARF6/PDGFC/BCL6/ITGA6/TGFBR2/NTRK3/SEMA3D	20
GO:0048667	cell morphogenesis involved in neuron differentiation	28/362	81/2052	0.000141354	0.00186152	0.00141697	FOXP1/FLRT3/NFIB/PAFAH1B1/NRP1/ALCAM/GAP43/FARP1/EN2/CDC42/SEMA3A/VCL/EPHA7/SEMA4D/ISL1/RELN/NEO1/DPYSL2/BCL2/DSCAM/NDEL1/THY1/EPHA4/NFASC/NTRK3/EPHA5/SEMA3D/RAB10	28
GO:0042327	positive regulation of phosphorylation	33/362	102/2052	0.00015715	0.00203819	0.00155145	ACVR2A/BMP2/PDGFRA/VEGFA/FZD4/INHBB/KIT/ACVR1/RBPMS2/EN2/CDC42/STK4/EPHA7/FGFR3/HMGB1/ISL1/RELN/GREM1/KITLG/IGF1/CCND1/GHR/BCL2/FGFR1/RAF1/WNT7B/DSCAM/ADCYAP1/EPHA4/PDGFC/ITGA6/TAOK3/NTRK3	33
GO:0007626	locomotory behavior	10/362	17/2052	0.000155992	0.00203819	0.00155145	CHD7/SOBP/FZD4/PAFAH1B1/SNAP25/CALB1/CCND2/DSCAM/EPHA4/ARCN1	10
GO:2000113	negative regulation of cellular macromolecule biosynthetic process	50/362	177/2052	0.000171946	0.00221332	0.00168476	RREB1/FOXP1/HDAC9/TGIF1/ZFHX4/BMP2/NFIB/ZEB1/ZNF706/MAFK/NR2F2/SOX11/H2AFY/HOXC8/RBM24/MAF/JARID2/MIER1/ITM2B/NFIA/PER2/GATA2/CBFA2T3/GATA6/TBX3/BMI1/THRB/TRIM71/SEMA4D/ISL1/HDAC4/GREM1/SMAD5/CNOT7/HOXB3/CCND1/RARB/FGFR1/PDCD4/IREB2/PDS5A/SP3/GLI3/CDC73/FOXG1/DPF3/BCL6/DR1/NR2E1/BRMS1L	50
GO:0060322	head development	28/362	82/2052	0.0001802	0.00228747	0.0017412	FLRT3/CHD7/NFIB/FZD4/NR2F2/PAFAH1B1/NRP1/MAFB/COL2A1/GATA2/EN2/SSBP3/EPHA7/BMI1/ISL1/RELN/DPYSL2/BCL2/RARB/FGFR1/RAF1/WNT7B/RAB18/NDEL1/YWHAE/ARCN1/TGFBR2/EPHA5	28
GO:0061564	axon development	27/362	78/2052	0.000181715	0.00228747	0.0017412	FOXP1/FLRT3/NFIB/PAFAH1B1/RGMA/NRP1/ALCAM/GAP43/EN2/SEMA3A/VCL/EPHA7/SEMA4D/ISL1/RELN/NEO1/DPYSL2/BCL2/DSCAM/NDEL1/THY1/EPHA4/NFASC/NTRK3/EPHA5/SEMA3D/RAB10	27
GO:0007409	axonogenesis	26/362	74/2052	0.000181697	0.00228747	0.0017412	FOXP1/FLRT3/NFIB/PAFAH1B1/NRP1/ALCAM/GAP43/EN2/SEMA3A/VCL/EPHA7/SEMA4D/ISL1/RELN/NEO1/DPYSL2/BCL2/DSCAM/NDEL1/THY1/EPHA4/NFASC/NTRK3/EPHA5/SEMA3D/RAB10	26
GO:0048583	regulation of response to stimulus	84/362	340/2052	0.00019455	0.00243117	0.00185058	AFAP1/MAGI3/NOG/ACVR2A/BMP2/CSNK1G1/PDGFRA/RGS17/VEGFA/ARHGEF3/FZD4/PAFAH1B1/RGMA/SOX11/H2AFY/INHBB/YWHAB/KIT/COL2A1/ACVR1/SYT1/COLEC12/PDIA3/GATA2/FARP1/PTPRJ/RBPMS2/SMAD6/INSIG1/SEMA3A/CACNA1C/HSPA5/DEPDC1B/NPAS2/EPHA7/PHACTR4/BMI1/FGFR3/SEMA4D/HMGB1/ISL1/RELN/NEO1/GRB2/HDAC4/SPRY2/GREM1/KITLG/EYA4/IGF1/FRZB/APCDD1/CNOT7/GHR/RECK/EYA1/BCL2/SHOC2/RGS9BP/FGFR1/PDCD4/RAF1/SOCS3/WNT7B/DSCAM/ADCYAP1…	84
GO:0045934	negative regulation of nucleobase-containing compound metabolic process	50/362	178/2052	0.000200861	0.00249184	0.00189677	RREB1/FOXP1/HDAC9/TGIF1/ZFHX4/BMP2/NFIB/YAP1/ZEB1/ZNF706/MAFK/NR2F2/SOX11/H2AFY/HOXC8/RBM24/MAF/JARID2/MIER1/NFIA/PER2/GATA2/CBFA2T3/GATA6/TBX3/BMI1/THRB/SEMA4D/ISL1/HDAC4/RCOR3/GREM1/SMAD5/TARDBP/CNOT7/HOXB3/CCND1/RARB/FGFR1/PDCD4/PDS5A/SP3/GLI3/CDC73/FOXG1/DPF3/BCL6/DR1/NR2E1/BRMS1L	50
GO:0048585	negative regulation of response to stimulus	41/362	138/2052	0.000213571	0.00263046	0.00200228	NOG/RGS17/PAFAH1B1/RGMA/YWHAB/COL2A1/ACVR1/GATA2/PTPRJ/RBPMS2/SMAD6/INSIG1/SEMA3A/HSPA5/PHACTR4/BMI1/SEMA4D/ISL1/SPRY2/GREM1/EYA4/IGF1/FRZB/APCDD1/CNOT7/EYA1/BCL2/RGS9BP/PDCD4/RAF1/SOCS3/THY1/EPHA4/CSNK1A1/BCL6/ITGA6/TAOK3/TGFBR2/SKI/SEMA3D/SPRY1	41
GO:0043408	regulation of MAPK cascade	24/362	67/2052	0.000230448	0.00281805	0.00214508	MAGI3/BMP2/PDGFRA/FZD4/PAFAH1B1/INHBB/KIT/PTPRJ/EPHA7/FGFR3/HMGB1/SPRY2/KITLG/IGF1/FGFR1/PDCD4/RAF1/WNT7B/ADCYAP1/EPHA4/PDGFC/TAOK3/NTRK3/SPRY1	24
GO:0007155	cell adhesion	44/362	152/2052	0.000239789	0.00289098	0.00220059	FN1/FLRT3/VEGFA/FZD4/HAPLN1/THBS2/NRP1/COL6A3/ALCAM/KIT/ITGAV/PPP1R12A/ACVR1/PPP1CB/NCAM1/PTPRJ/PRKAR1A/SMAD6/VCL/NEGR1/PODXL/CAV1/EPHA7/BMI1/RELN/NEO1/CDH11/GREM1/KITLG/IGF1/COL12A1/BCL2/CNTNAP5/DSCAM/THY1/EPHA4/TFRC/MAEA/SPON1/BCL6/TNC/NFASC/ITGA6/CNTN5	44
GO:0022610	biological adhesion	44/362	152/2052	0.000239789	0.00289098	0.00220059	FN1/FLRT3/VEGFA/FZD4/HAPLN1/THBS2/NRP1/COL6A3/ALCAM/KIT/ITGAV/PPP1R12A/ACVR1/PPP1CB/NCAM1/PTPRJ/PRKAR1A/SMAD6/VCL/NEGR1/PODXL/CAV1/EPHA7/BMI1/RELN/NEO1/CDH11/GREM1/KITLG/IGF1/COL12A1/BCL2/CNTNAP5/DSCAM/THY1/EPHA4/TFRC/MAEA/SPON1/BCL6/TNC/NFASC/ITGA6/CNTN5	44
GO:0001667	ameboidal-type cell migration	17/362	41/2052	0.000263857	0.00313697	0.00238783	ETS1/NR2F2/PAFAH1B1/NRP1/KIT/ACVR1/GATA2/SEMA3A/MYH9/PHACTR4/SEMA4D/ISL1/GREM1/KITLG/FGFR1/ARF6/SEMA3D	17
GO:0007610	behavior	17/362	41/2052	0.000263857	0.00313697	0.00238783	FOXP1/CHD7/SOBP/FZD4/PAFAH1B1/MAFG/NTF3/SNAP25/CALB1/CCND2/BCL2/BDNF/KCNAB1/DSCAM/GABRG2/EPHA4/ARCN1	17
GO:0097191	extrinsic apoptotic signaling pathway	12/362	24/2052	0.00026914	0.00315594	0.00240227	COL2A1/ACVR1/PDIA3/FGFR3/KITLG/EYA4/IGF1/EYA1/BCL2/FGFR1/RAF1/ITGA6	12
GO:1901342	regulation of vasculature development	12/362	24/2052	0.00026914	0.00315594	0.00240227	VEGFA/ETS1/THBS2/TSPAN12/KIT/GATA2/GATA6/BTG1/ISL1/GREM1/HOXA5/RECK	12
GO:0014031	mesenchymal cell development	9/362	15/2052	0.000277752	0.00323477	0.00246227	ACVR1/SEMA3A/PHACTR4/SEMA4D/ISL1/KITLG/BCL2/SEMA3D/TAPT1	9
GO:0023014	signal transduction by protein phosphorylation	26/362	76/2052	0.000298006	0.00343183	0.00261228	MAGI3/BMP2/PDGFRA/FZD4/PAFAH1B1/INHBB/KIT/PTPRJ/STK4/EPHA7/FGFR3/HMGB1/SPRY2/KITLG/IGF1/FGFR1/PDCD4/RAF1/WNT7B/ADCYAP1/EPHA4/YWHAE/PDGFC/TAOK3/NTRK3/SPRY1	26
GO:0030335	positive regulation of cell migration	18/362	45/2052	0.000298681	0.00343183	0.00261228	VEGFA/ETS1/KIT/ACVR1/GATA2/SEMA3A/PODXL/SEMA4D/KITLG/IGF1/BCL2/FGFR1/ARF6/PDGFC/ITGA6/TGFBR2/NTRK3/SEMA3D	18
GO:0010562	positive regulation of phosphorus metabolic process	34/362	110/2052	0.000336722	0.00381767	0.00290597	ACVR2A/BMP2/PDGFRA/VEGFA/FZD4/INHBB/KIT/PPP1R12A/ACVR1/RBPMS2/EN2/CDC42/STK4/EPHA7/FGFR3/HMGB1/ISL1/RELN/GREM1/KITLG/IGF1/CCND1/GHR/BCL2/FGFR1/RAF1/WNT7B/DSCAM/ADCYAP1/EPHA4/PDGFC/ITGA6/TAOK3/NTRK3	34
GO:0045937	positive regulation of phosphate metabolic process	34/362	110/2052	0.000336722	0.00381767	0.00290597	ACVR2A/BMP2/PDGFRA/VEGFA/FZD4/INHBB/KIT/PPP1R12A/ACVR1/RBPMS2/EN2/CDC42/STK4/EPHA7/FGFR3/HMGB1/ISL1/RELN/GREM1/KITLG/IGF1/CCND1/GHR/BCL2/FGFR1/RAF1/WNT7B/DSCAM/ADCYAP1/EPHA4/PDGFC/ITGA6/TAOK3/NTRK3	34
GO:0030030	cell projection organization	41/362	141/2052	0.00035741	0.00399926	0.00304419	FOXP1/FLRT3/NFIB/FZD4/PAFAH1B1/RGMA/NRP1/ALCAM/KIT/GAP43/FARP1/EN2/CDC42/SEMA3A/VCL/PODXL/EPHA7/NTF3/SEMA4D/ISL1/RELN/NEO1/SNAP25/DPYSL2/SGK1/BCL2/BDNF/FGFR1/DSCAM/ADCYAP1/NDEL1/THY1/EPHA4/ARF6/NFASC/ITGA6/NTRK3/EPHA5/SEMA3D/TAPT1/RAB10	41
GO:0120036	plasma membrane bounded cell projection organization	41/362	141/2052	0.00035741	0.00399926	0.00304419	FOXP1/FLRT3/NFIB/FZD4/PAFAH1B1/RGMA/NRP1/ALCAM/KIT/GAP43/FARP1/EN2/CDC42/SEMA3A/VCL/PODXL/EPHA7/NTF3/SEMA4D/ISL1/RELN/NEO1/SNAP25/DPYSL2/SGK1/BCL2/BDNF/FGFR1/DSCAM/ADCYAP1/NDEL1/THY1/EPHA4/ARF6/NFASC/ITGA6/NTRK3/EPHA5/SEMA3D/TAPT1/RAB10	41
GO:0050767	regulation of neurogenesis	28/362	85/2052	0.000359919	0.00400118	0.00304566	CHD7/ZEB1/FZD4/PAFAH1B1/RGMA/DDX6/NEUROD1/GATA2/SMAD6/SEMA3A/EPHA7/TCF12/NTF3/SEMA4D/ISL1/SNAP25/DPYSL2/BCL2/BDNF/FGFR1/DSCAM/NDEL1/THY1/EPHA4/ARF6/ITGA6/NTRK3/SEMA3D	28
GO:0071901	negative regulation of protein serine/threonine kinase activity	7/362	10/2052	0.00037147	0.00410294	0.00312312	NR2F2/H2AFY/PTPRJ/PRKAR1A/SPRY2/PDCD4/SPRY1	7
GO:0001933	negative regulation of protein phosphorylation	13/362	28/2052	0.000378418	0.00415289	0.00316114	NR2F2/PAFAH1B1/H2AFY/PTPRJ/PRKAR1A/CAV1/SPRY2/CTDSPL/PDCD4/THY1/TAOK3/NTRK3/SPRY1	13
GO:0051960	regulation of nervous system development	30/362	94/2052	0.000413463	0.00450859	0.0034319	FLRT3/CHD7/ZEB1/FZD4/MTMR2/PAFAH1B1/RGMA/DDX6/NEUROD1/GATA2/SMAD6/SEMA3A/EPHA7/TCF12/NTF3/SEMA4D/ISL1/SNAP25/DPYSL2/BCL2/BDNF/FGFR1/DSCAM/NDEL1/THY1/EPHA4/ARF6/ITGA6/NTRK3/SEMA3D	30
GO:0007423	sensory organ development	29/362	90/2052	0.000431361	0.00467399	0.0035578	NOG/CHD7/SOBP/FZD4/PAFAH1B1/TSPAN12/MAFB/MAF/COL2A1/NEUROD1/GATA2/INSIG1/MAB21L1/PHACTR4/IGF1/CALB1/BCL2/RARB/FGFR1/WNT7B/RAB18/DSCAM/THY1/EPHA4/SP3/ZIC1/TGFBR2/NBL1/NTRK3	29
GO:0090596	sensory organ morphogenesis	19/362	50/2052	0.00044388	0.00477939	0.00363803	CHD7/SOBP/TSPAN12/MAFB/COL2A1/NEUROD1/GATA2/INSIG1/PHACTR4/IGF1/CALB1/BCL2/RARB/FGFR1/DSCAM/THY1/SP3/ZIC1/NBL1	19
GO:0072359	circulatory system development	38/362	129/2052	0.00044701	0.004783	0.00364078	FOXP1/HDAC9/FLRT3/BMP2/CHD7/VEGFA/ALDH1A2/ETS1/FZD4/GJA1/NR2F2/THBS2/TSPAN12/NRP1/KIT/ITGAV/COL2A1/ACVR1/GATA2/PRKAR1A/GATA6/HAS2/TBX3/MYH9/ETS2/SAT1/BTG1/ISL1/GREM1/IGF1/HOXA5/RECK/RARB/FGFR1/THY1/TGFBR2/NTRK3/PITX2	38
GO:0000904	cell morphogenesis involved in differentiation	32/362	103/2052	0.000457301	0.00486273	0.00370146	FOXP1/FLRT3/NFIB/FZD4/PAFAH1B1/NRP1/COL6A3/ALCAM/GAP43/FARP1/EN2/CDC42/SEMA3A/VCL/MYH9/EPHA7/SEMA4D/ISL1/RELN/NEO1/DPYSL2/COL12A1/BCL2/DSCAM/NDEL1/THY1/EPHA4/NFASC/NTRK3/EPHA5/SEMA3D/RAB10	32
GO:0031401	positive regulation of protein modification process	35/362	116/2052	0.000460597	0.00486754	0.00370512	ACVR2A/BMP2/PDGFRA/VEGFA/FZD4/INHBB/KIT/JARID2/PPP1R12A/ACVR1/RBPMS2/CDC42/STK4/EPHA7/BMI1/FGFR3/HMGB1/ISL1/RELN/HDAC4/GREM1/KITLG/IGF1/CCND1/GHR/BCL2/FGFR1/RAF1/WNT7B/DCUN1D1/ADCYAP1/EPHA4/PDGFC/TAOK3/NTRK3	35
GO:0000165	MAPK cascade	25/362	74/2052	0.000485772	0.00497989	0.00379065	MAGI3/BMP2/PDGFRA/FZD4/PAFAH1B1/INHBB/KIT/PTPRJ/EPHA7/FGFR3/HMGB1/SPRY2/KITLG/IGF1/FGFR1/PDCD4/RAF1/WNT7B/ADCYAP1/EPHA4/YWHAE/PDGFC/TAOK3/NTRK3/SPRY1	25
GO:0072358	cardiovascular system development	25/362	74/2052	0.000485772	0.00497989	0.00379065	FOXP1/CHD7/VEGFA/ETS1/FZD4/NR2F2/THBS2/TSPAN12/NRP1/KIT/ITGAV/ACVR1/GATA2/GATA6/HAS2/MYH9/ETS2/SAT1/BTG1/ISL1/GREM1/HOXA5/RECK/FGFR1/THY1	25
GO:0003002	regionalization	21/362	58/2052	0.000482654	0.00497989	0.00379065	NOG/ACVR2A/NR2F2/HOXC8/MAFB/ACVR1/HAND2/HOXA11/TBX3/BMI1/ISL1/RELN/GREM1/HOXA3/HOXB3/HOXA5/FGFR1/WNT7B/EPHA4/GLI3/SPRY1	21
GO:0016311	dephosphorylation	21/362	58/2052	0.000482654	0.00497989	0.00379065	CTDSPL2/MTMR2/YWHAB/PPP1R12A/ACVR1/PPP1CB/PTPRJ/SMAD6/RIMBP2/PHACTR4/SEMA4D/EYA4/CTDSPL/PTPRG/EYA1/BCL2/SHOC2/YWHAE/PPP2CB/RCAN3/PPP2R2D	21
GO:0060562	epithelial tube morphogenesis	14/362	32/2052	0.000481793	0.00497989	0.00379065	ALDH1A2/ACVR1/HS2ST1/HOXA11/TBX3/PODXL/ETS2/EPHA7/PHACTR4/GREM1/HOXA5/BCL2/EPHA4/PITX2	14
GO:0045765	regulation of angiogenesis	11/362	22/2052	0.00048993	0.00499262	0.00380034	VEGFA/ETS1/THBS2/TSPAN12/GATA2/GATA6/BTG1/ISL1/GREM1/HOXA5/RECK	11
GO:0048514	blood vessel morphogenesis	23/362	66/2052	0.000494394	0.0050083	0.00381227	CHD7/VEGFA/ETS1/FZD4/NR2F2/THBS2/TSPAN12/NRP1/ITGAV/ACVR1/GATA2/GATA6/HAS2/MYH9/ETS2/SAT1/BTG1/ISL1/GREM1/HOXA5/RECK/FGFR1/THY1	23
GO:0006470	protein dephosphorylation	17/362	43/2052	0.000518596	0.00519202	0.00395212	CTDSPL2/MTMR2/YWHAB/PPP1R12A/PPP1CB/PTPRJ/PHACTR4/EYA4/CTDSPL/PTPRG/EYA1/BCL2/SHOC2/YWHAE/PPP2CB/RCAN3/PPP2R2D	17
GO:0031400	negative regulation of protein modification process	17/362	43/2052	0.000518596	0.00519202	0.00395212	NR2F2/PAFAH1B1/H2AFY/YWHAB/JARID2/PTPRJ/PRKAR1A/CAV1/SPRY2/CTDSPL/N4BP1/PDCD4/THY1/YWHAE/TAOK3/NTRK3/SPRY1	17
GO:0042472	inner ear morphogenesis	10/362	19/2052	0.000528776	0.00526316	0.00400627	CHD7/SOBP/MAFB/COL2A1/GATA2/INSIG1/IGF1/FGFR1/ZIC1/NBL1	10
GO:2000147	positive regulation of cell motility	18/362	47/2052	0.000562229	0.00556379	0.00423511	VEGFA/ETS1/KIT/ACVR1/GATA2/SEMA3A/PODXL/SEMA4D/KITLG/IGF1/BCL2/FGFR1/ARF6/PDGFC/ITGA6/TGFBR2/NTRK3/SEMA3D	18
GO:0050730	regulation of peptidyl-tyrosine phosphorylation	13/362	29/2052	0.000578018	0.00565467	0.00430428	VEGFA/KIT/CAV1/EPHA7/FGFR3/ISL1/GREM1/KITLG/IGF1/CNOT7/GHR/EPHA4/PDGFC	13
GO:0071773	cellular response to BMP stimulus	13/362	29/2052	0.000578018	0.00565467	0.00430428	NOG/ACVR2A/BMP2/BMPR1B/RGMA/COL2A1/ACVR1/RBPMS2/GATA6/NEO1/GREM1/SMAD5/SKI	13
GO:0043085	positive regulation of catalytic activity	34/362	113/2052	0.000589619	0.00573539	0.00436572	RGS17/FZD4/YWHAB/KIT/PPP1R12A/ACVR1/NF1/CDC42/DEPDC1B/ATP1B3/STK4/PHACTR4/BMI1/FGFR3/SEMA4D/RELN/GREM1/KITLG/IGF1/CCND1/BCL2/FGFR1/RAF1/DCUN1D1/ADCYAP1/NDEL1/THY1/EPHA4/PDGFC/ATP1B1/SMAP2/ITGA6/TAOK3/NTRK3	34
GO:0001934	positive regulation of protein phosphorylation	30/362	96/2052	0.000619414	0.00595751	0.0045348	ACVR2A/BMP2/PDGFRA/VEGFA/FZD4/INHBB/KIT/ACVR1/RBPMS2/CDC42/STK4/EPHA7/FGFR3/HMGB1/ISL1/RELN/GREM1/KITLG/IGF1/CCND1/GHR/BCL2/FGFR1/RAF1/WNT7B/ADCYAP1/EPHA4/PDGFC/TAOK3/NTRK3	30
GO:0002009	morphogenesis of an epithelium	20/362	55/2052	0.00061682	0.00595751	0.0045348	FLRT3/ALDH1A2/PAFAH1B1/ACVR1/HS2ST1/CDC42/HOXA11/VCL/TBX3/PODXL/ETS2/EPHA7/PHACTR4/GREM1/HOXA5/BCL2/FGFR1/EPHA4/PITX2/RAB10	20
GO:0044093	positive regulation of molecular function	40/362	140/2052	0.000631319	0.00600454	0.0045706	RGS17/FZD4/YWHAB/KIT/PPP1R12A/ACVR1/NF1/CDC42/ARID5B/DEPDC1B/ATP1B3/STK4/PHACTR4/BMI1/FGFR3/SEMA4D/ISL1/RELN/HDAC4/GREM1/KITLG/IGF1/CCND1/BCL2/FGFR1/RAF1/DCUN1D1/ADCYAP1/NDEL1/RAN/THY1/EPHA4/ARF6/EDF1/PDGFC/ATP1B1/SMAP2/ITGA6/TAOK3/NTRK3	40
GO:0045597	positive regulation of cell differentiation	33/362	109/2052	0.000628956	0.00600454	0.0045706	ACVR2A/BMP2/FOS/ZEB1/BMPR1B/FZD4/PAFAH1B1/H2AFY/RBM24/KIT/ACVR1/NEUROD1/GATA2/SMAD6/GATA6/SEMA3A/HOXA11/TCF12/BMI1/BTG1/ISL1/GREM1/KITLG/SMAD5/IGF1/HOXA5/BCL2/FGFR1/DSCAM/ITGA6/TGFBR2/NTRK3/PITX2	33
GO:0042326	negative regulation of phosphorylation	14/362	33/2052	0.000704838	0.00666676	0.00507467	NR2F2/PAFAH1B1/H2AFY/PTPRJ/PRKAR1A/CAV1/HDAC4/SPRY2/CTDSPL/PDCD4/THY1/TAOK3/NTRK3/SPRY1	14
GO:0051240	positive regulation of multicellular organismal process	45/362	164/2052	0.000761273	0.00712508	0.00542354	FLRT3/ACVR2A/BMP2/CHD7/FOS/VEGFA/ZEB1/BMPR1B/ETS1/FZD4/PAFAH1B1/H2AFY/INHBB/RBM24/KIT/ACVR1/NEUROD1/GATA2/SMAD6/GATA6/SEMA3A/HOXA11/TCF12/BMI1/SEMA4D/BTG1/HMGB1/ISL1/GREM1/KITLG/SMAD5/IGF1/HOXA5/BCL2/FGFR1/DSCAM/ARF6/TFRC/PDGFC/ITGA6/TGFBR2/NTRK3/TAPT1/PITX2/SPRY1	45
GO:0006935	chemotaxis	25/362	76/2052	0.000765779	0.00712508	0.00542354	FOXP1/FLRT3/NFIB/PDGFRA/VEGFA/NRP1/ALCAM/KIT/GAP43/EN2/SEMA3A/EPHA7/SEMA4D/HMGB1/ISL1/RELN/NEO1/DPYSL2/FGFR1/DSCAM/EPHA4/NFASC/NTRK3/EPHA5/SEMA3D	25
GO:0042330	taxis	25/362	76/2052	0.000765779	0.00712508	0.00542354	FOXP1/FLRT3/NFIB/PDGFRA/VEGFA/NRP1/ALCAM/KIT/GAP43/EN2/SEMA3A/EPHA7/SEMA4D/HMGB1/ISL1/RELN/NEO1/DPYSL2/FGFR1/DSCAM/EPHA4/NFASC/NTRK3/EPHA5/SEMA3D	25
GO:0001944	vasculature development	24/362	72/2052	0.000786775	0.00728086	0.00554212	CHD7/VEGFA/ETS1/FZD4/NR2F2/THBS2/TSPAN12/NRP1/KIT/ITGAV/ACVR1/GATA2/GATA6/HAS2/MYH9/ETS2/SAT1/BTG1/ISL1/GREM1/HOXA5/RECK/FGFR1/THY1	24
GO:0000902	cell morphogenesis	39/362	137/2052	0.000801866	0.00729139	0.00555014	FOXP1/FN1/FLRT3/NFIB/FZD4/PAFAH1B1/NRP1/COL6A3/ALCAM/KIT/GAP43/FARP1/EN2/CDC42/SEMA3A/VCL/MYH9/EPHA7/NTF3/SEMA4D/ISL1/RELN/NEO1/CDH11/DPYSL2/COL12A1/SGK1/BCL2/BDNF/DSCAM/NDEL1/THY1/EPHA4/BCL6/NFASC/NTRK3/EPHA5/SEMA3D/RAB10	39
GO:0051241	negative regulation of multicellular organismal process	32/362	106/2052	0.000804949	0.00729139	0.00555014	ACVR2B/FOXP1/NOG/NFIB/ZNF706/MTMR2/NR2F2/RGMA/THBS2/INHBB/MAFB/DDX6/GATA2/SMAD6/GATA6/SEMA3A/EPHA7/SEMA4D/ISL1/HDAC4/GREM1/IGF1/HOXA5/BCL2/RARB/FGFR1/THY1/EPHA4/CDC73/BCL6/TGFBR2/SEMA3D	32
GO:0001568	blood vessel development	23/362	68/2052	0.000802707	0.00729139	0.00555014	CHD7/VEGFA/ETS1/FZD4/NR2F2/THBS2/TSPAN12/NRP1/ITGAV/ACVR1/GATA2/GATA6/HAS2/MYH9/ETS2/SAT1/BTG1/ISL1/GREM1/HOXA5/RECK/FGFR1/THY1	23
GO:0007420	brain development	23/362	68/2052	0.000802707	0.00729139	0.00555014	CHD7/NFIB/FZD4/NR2F2/PAFAH1B1/NRP1/MAFB/GATA2/EN2/EPHA7/BMI1/ISL1/RELN/DPYSL2/BCL2/RARB/FGFR1/WNT7B/RAB18/NDEL1/YWHAE/ARCN1/EPHA5	23
GO:0051094	positive regulation of developmental process	40/362	142/2052	0.000864486	0.00769552	0.00585775	FLRT3/ACVR2A/BMP2/CHD7/FOS/VEGFA/ZEB1/BMPR1B/FZD4/PAFAH1B1/H2AFY/RBM24/KIT/ACVR1/NEUROD1/GATA2/SMAD6/GATA6/SEMA3A/HOXA11/TCF12/BMI1/SEMA4D/BTG1/ISL1/GREM1/KITLG/SMAD5/IGF1/HOXA5/BCL2/FGFR1/DSCAM/TFRC/ITGA6/TGFBR2/NTRK3/TAPT1/PITX2/SPRY1	40
GO:0048863	stem cell differentiation	13/362	30/2052	0.000859773	0.00769552	0.00585775	RBM24/KIT/JARID2/ACVR1/GATA6/SEMA3A/PHACTR4/SEMA4D/ISL1/GREM1/KITLG/SEMA3D/TAPT1	13
GO:0071772	response to BMP	13/362	30/2052	0.000859773	0.00769552	0.00585775	NOG/ACVR2A/BMP2/BMPR1B/RGMA/COL2A1/ACVR1/RBPMS2/GATA6/NEO1/GREM1/SMAD5/SKI	13
GO:0046328	regulation of JNK cascade	7/362	11/2052	0.000867544	0.00769552	0.00585775	MAGI3/FZD4/PAFAH1B1/PDCD4/WNT7B/EPHA4/TAOK3	7
GO:0042471	ear morphogenesis	10/362	20/2052	0.000893751	0.00788712	0.0060036	CHD7/SOBP/MAFB/COL2A1/GATA2/INSIG1/IGF1/FGFR1/ZIC1/NBL1	10
GO:0012501	programmed cell death	47/362	175/2052	0.000971135	0.00838005	0.00637881	ACVR2B/BMP2/MEF2A/INHBB/KIT/ITPK1/COL2A1/ACVR1/DICER1/PDIA3/USP28/GATA2/DYRK2/EN2/GATA6/TBX3/STK4/EPHA7/NTF3/BMI1/FGFR3/BTG1/ISL1/SGMS1/GREM1/KITLG/EYA4/IGF1/HOXA5/SGK1/EYA1/BCL2/RARB/BDNF/FGFR1/RAF1/SOCS3/KLHL20/ARF6/PPP2CB/TNFAIP8/CDC73/MAEA/BCL6/ITGA6/TGFBR2/NTRK3	47
GO:0060548	negative regulation of cell death	29/362	94/2052	0.000965104	0.00838005	0.00637881	KIT/CHMP4B/COL2A1/ACVR1/GATA2/EN2/GATA6/TBX3/NPAS2/NTF3/BMI1/ISL1/SGMS1/GREM1/KITLG/EYA4/IGF1/EYA1/BCL2/RARB/BDNF/RAF1/SOCS3/KLHL20/TNFAIP8/CDC73/MAEA/BCL6/ITGA6	29
GO:0044843	cell cycle G1/S phase transition	9/362	17/2052	0.000965767	0.00838005	0.00637881	ACVR1/USP37/TRIM71/CTDSPL/CCNE1/CCND1/CCND2/BCL2/CDC73	9
GO:0014032	neural crest cell development	8/362	14/2052	0.000974083	0.00838005	0.00637881	ACVR1/SEMA3A/PHACTR4/SEMA4D/ISL1/KITLG/SEMA3D/TAPT1	8
GO:0014033	neural crest cell differentiation	8/362	14/2052	0.000974083	0.00838005	0.00637881	ACVR1/SEMA3A/PHACTR4/SEMA4D/ISL1/KITLG/SEMA3D/TAPT1	8
GO:0051347	positive regulation of transferase activity	19/362	53/2052	0.00103253	0.00883847	0.00672776	FZD4/KIT/CDC42/STK4/BMI1/FGFR3/RELN/GREM1/KITLG/IGF1/CCND1/FGFR1/RAF1/DCUN1D1/ADCYAP1/EPHA4/PDGFC/TAOK3/NTRK3	19
GO:0008283	cell proliferation	50/362	190/2052	0.00109906	0.00936111	0.00712559	ACVR2B/FOXP1/PDS5B/TES/ACVR2A/NFIB/PDGFRA/VEGFA/BMPR1B/NR2F2/PAFAH1B1/KIT/MAFG/USP28/NF1/GATA2/PRKAR1A/RBPMS2/SMAD6/GATA6/TBX3/MAB21L1/SAT1/CAV1/IRF2/BMI1/FGFR3/TRIM71/BTG1/ISL1/HDAC4/SPRY2/KITLG/IGF1/CNOT7/HOXA5/BCL2/RARB/FGFR1/FAM60A/RAF1/WNT7B/CDC73/TFRC/PDGFC/BCL6/NTRK3/PITX2/RAB10/SPRY1	50
GO:0032989	cellular component morphogenesis	44/362	162/2052	0.00110591	0.00937282	0.0071345	FOXP1/FN1/FLRT3/NFIB/FZD4/MTMR2/PAFAH1B1/NRP1/COL6A3/ALCAM/KIT/GAP43/FARP1/PRKAR1A/EN2/CDC42/SEMA3A/VCL/MYH9/EPHA7/NTF3/SEMA4D/WDR1/ISL1/CSRP2/RELN/NEO1/CDH11/DPYSL2/TBPL1/COL12A1/SGK1/BCL2/BDNF/DSCAM/NDEL1/THY1/EPHA4/BCL6/NFASC/NTRK3/EPHA5/SEMA3D/RAB10	44
GO:0009719	response to endogenous stimulus	48/362	181/2052	0.00115999	0.00978277	0.00744655	ACVR2B/DNMT3A/NOG/FLRT3/ACVR2A/BMP2/FOS/BMPR1B/NR2F2/RGMA/INHBB/KIT/RAB14/COL2A1/ESR1/ACVR1/RAP1B/RBPMS2/CHRM2/SMAD6/GATA6/MYO5A/NTF3/THRB/FGFR3/TRIM71/NEO1/NR5A2/SPRY2/GREM1/SMAD5/IGF1/GHR/BCL2/RARB/BDNF/FGFR1/GABRG2/NDEL1/EPHA4/PDGFC/NR2E1/TGFBR2/SKI/FGF4/NTRK3/RAB10/SPRY1	48
GO:0040012	regulation of locomotion	25/362	78/2052	0.00117708	0.00987824	0.00751922	VEGFA/ETS1/NR2F2/KIT/CHMP4B/ACVR1/GATA2/SEMA3A/VCL/PODXL/SEMA4D/KITLG/IGF1/RECK/BCL2/FGFR1/FAM60A/DSCAM/THY1/ARF6/PDGFC/ITGA6/TGFBR2/NTRK3/SEMA3D	25

## Sheet: KEGG
KEGG pathway analysis for target genes of DE miRNAs（count reads >1000） in profile 0
ID	Description	GeneRatio	BgRatio	pvalue	p.adjust	qvalue	geneID	Count
gga04010	MAPK signaling pathway	80/715	261/4937	4.82e-12	5.42e-10	4.31e-10	MAP3K4/DUSP5/ERBB4/IGF1R/MET/PAK2/FOS/PDGFRA/VEGFA/DUSP1/MAP3K13/NLK/SOS2/KIT/SOS1/MAP2K4/DUSP10/NF1/CACNA1H/RAP1B/CDC42/CACNA1C/CACNB2/STK4/MAP4K3/NTF3/KDR/PDGFA/PPP3R1/FGFR3/PPP3CA/DUSP6/CRKL/RPS6KA5/VEGFC/MAPK14/MAPK8IP3/GRB2/KITLG/NFATC1/TAOK1/RAPGEF2/IGF1/HSPA8/RASA1/MAP4K4/PRKACB/TGFBR1/PTPRR/FGF7/AKT3/BDNF/MAP2K1/FGFR1/INSR/MAP3K7/RAF1/RAP1A/KRAS/CACNA2D1/MAP3K1/GNA12/PRKCA/MAP3K3/PDGFRB/P…	80
gga04810	Regulation of actin cytoskeleton	64/715	190/4937	8.27e-12	5.42e-10	4.31e-10	PAK2/PIP5K1B/FN1/ITGB8/PDGFRA/CXCL12/SOS2/ROCK1/SOS1/ITGAV/TMSB4Y/PPP1R12A/TMSB4X/VAV2/WASL/PPP1CB/ITGA9/IQGAP2/CHRM2/CDC42/VCL/PIK3R3/PIK3R1/PDGFA/FGFR3/APC/CRKL/PPP1CC/ENAH/VAV3/ARHGEF4/ROCK2/RDX/FGF7/MYLK4/MAP2K1/FGFR1/RAF1/ABI2/BAIAP2/TIAM1/KRAS/ACTG1/GNA12/ARHGEF7/ARPC5L/ARHGEF12/PDGFRB/WASF2/PDGFC/ARPC1A/FGF18/ITGA6/DIAPH2/PFN2/CRK/SSH2/WASF1/PIP4K2A/FGF4/FGF9/NCKAP1/RAC1/PIP5K1C	64
gga04144	Endocytosis	62/715	228/4937	2.22e-07	3.63e-06	2.89e-06	IGF1R/PIP5K1B/RAB11FIP4/EHD3/PDGFRA/GIT2/ITCH/STAM/CHMP4B/EPS15/WASL/RAB11FIP2/CLTC/NEDD4L/KIF5B/CDC42/PDCD6IP/SMURF1/ARF1/VPS26A/CAV1/FGFR3/SMAP1/SMURF2/VPS4B/ARFGEF1/PARD6B/RAB5A/VPS37A/SNX2/RAB4A/ZFYVE9/HSPA8/PSD/TGFBR1/SH3GL2/KIF5C/WWP1/EPN2/USP8/ARF6/ARPC5L/PARD6G/LDLRAP1/SPG20/TFRC/NEDD4/ARPC1A/CAPZA1/IGF2R/SMAP2/RAB11FIP5/TGFBR2/AP2B1/RAB22A/TSG101/DAB2/IQSEC1/RAB35/RAB5C/RAB10/PIP5K1C	62
gga04510	Focal adhesion	60/715	189/4937	5.91e-10	1.52e-08	1.21e-08	COL4A5/IGF1R/MET/PAK2/THBS1/FN1/ITGB8/PDGFRA/VEGFA/THBS2/SOS2/PTEN/COL4A1/ROCK1/COL6A3/SOS1/ITGAV/PPP1R12A/COL2A1/VAV2/PPP1CB/ITGA9/RAP1B/CDC42/VCL/PIK3R3/CAV1/LAMC1/PIK3R1/KDR/PDGFA/CRKL/VEGFC/PPP1CC/RELN/GRB2/VAV3/PDPK1/IGF1/TLN2/ROCK2/CCND1/MYLK4/CCND2/AKT3/BCL2/ARHGAP5/MAP2K1/RAF1/RAP1A/ACTG1/PRKCA/CTNNB1/PDGFRB/PDGFC/TNC/ITGA6/SHC4/CRK/RAC1	60
gga04120	Ubiquitin mediated proteolysis	46/715	127/4937	5.52e-10	1.52e-08	1.21e-08	CUL3/CUL4B/FBXW11/FBXW7/ITCH/UBE2D1/UBE2F/UBE2K/CUL5/UBE2W/SKP1/UBE2D3/UBE2Z/WWP2/NEDD4L/SMURF1/UBE2G1/SOCS1/UBR5/UBE2E2/SMURF2/UBE2N/UBE2D2/TRIM37/BIRC6/WWP1/UBE4B/BTRC/SIAH1/CUL2/SOCS3/UBE2A/MID1/CUL4A/HERC2/UBE2R2/MAP3K1/RFWD2/UBE3C/NEDD4/RHOBTB1/UBE3A/UBE2H/CDC27/TRIP12/UBE2E3	46
gga04310	Wnt signaling pathway	46/715	141/4937	2.56e-08	4.79e-07	3.81e-07	AXIN2/CTBP2/FBXW11/FZD4/NLK/RSPO2/PRICKLE2/TBL1XR1/SKP1/FZD10/CAMK2A/CTNNBIP1/SERPINF1/DKK2/PPP3R1/FZD8/PPP3CA/FZD5/GPC4/ZNRF3/APC/NFATC1/LRP6/FZD6/ROCK2/PRKACB/CCND1/CCND2/RSPO3/BTRC/SIAH1/MAP3K7/NKD1/BAMBI/WNT7B/VANGL1/PPARD/PRKCA/FZD7/CTNNB1/CSNK1A1/SFRP4/TBL1X/CAMK2D/RAC1/CAMK2G	46
gga04218	Cellular senescence	42/715	143/4937	2.55e-06	3.04e-05	2.42e-05	HIPK2/ETS1/FBXW11/ITPR1/PTEN/PPP1CB/E2F3/TSC1/LIN54/TRPM7/RBL2/HIPK3/HIPK1/PIK3R3/RBBP4/SIRT1/PIK3R1/PPP3R1/FOXO3/PPP3CA/MAPK14/ZFP36L1/PPP1CC/FOXO1/NFATC1/CALM2/CALM1/TGFBR1/CCNE1/CCND1/CCND2/AKT3/BTRC/RASSF5/MAP2K1/RAF1/SLC25A6/LIN9/KRAS/CDK6/TGFBR2/E2F5	42
gga04150	mTOR signaling pathway	40/715	140/4937	9.33e-06	0.000101892	8.11e-05	IGF1R/FZD4/SOS2/PTEN/SOS1/RICTOR/PRKAA2/FNIP1/FZD10/TSC1/PIK3R3/CLIP1/GRB10/PIK3R1/FZD8/FZD5/GRB2/ULK1/PDPK1/IGF1/ULK2/LRP6/FZD6/RRAGD/SGK1/AKT3/RRAGA/CAB39/MAP2K1/ATP6V1B2/INSR/EIF4E/RAF1/WNT7B/KRAS/PRKCA/FZD7/RPS6KA2/RPS6KA3/ATP6V1A	40
gga04114	Oocyte meiosis	39/715	99/4937	6.98e-10	1.52e-08	1.21e-08	CPEB4/IGF1R/PPP2R5E/CPEB3/CPEB1/CPEB2/FBXW11/ITPR1/YWHAB/ADCY2/SKP1/PPP1CB/CAMK2A/YWHAG/PPP3R1/ADCY1/PPP3CA/PPP2CA/PPP2R5C/MAPK14/PPP1CC/IGF1/CALM2/CALM1/PRKACB/AR/CCNE1/BTRC/YWHAH/MAP2K1/YWHAQ/YWHAE/PPP2CB/YWHAZ/RPS6KA2/CAMK2D/RPS6KA3/CDC27/CAMK2G	39
gga04068	FoxO signaling pathway	39/715	122/4937	5.52e-07	8.03e-06	6.39e-06	IGF1R/BCL2L11/NLK/SOS2/PTEN/S1PR1/PRKAG2/SOS1/PRKAA2/IRS2/RBL2/PIK3R3/SETD7/STK4/SIRT1/CDKN1B/PIK3R1/PLK4/FOXO3/PLK2/MAPK14/GRB2/FOXO1/PDPK1/IGF1/TGFBR1/CCND1/CCND2/SGK1/AKT3/USP7/MAP2K1/INSR/RAF1/KRAS/SGK3/FOXG1/BCL6/TGFBR2	39
gga04350	TGF-beta signaling pathway	38/715	90/4937	1.03e-10	4.5e-09	3.58e-09	ACVR2B/ID4/NOG/TGIF1/TGIF2/THBS1/ACVR2A/BMP2/BMPR1B/FBN1/RGMA/INHBB/ROCK1/SKP1/ACVR1/LTBP1/SMAD7/BMPR2/SMAD6/SMURF1/PPP2CA/SMURF2/NEO1/GREM1/GREM2/SMAD5/ZFYVE9/TGFBR1/BMPR1A/BAMBI/RGMB/PPP2CB/TGFBR2/E2F5/NBL1/ACVR1B/PITX2/TFDP3	38
gga04261	Adrenergic signaling in cardiomyocytes	37/715	128/4937	1.52e-05	0.000141809	0.000112809	PPP2R5E/ADRB1/ATP2B2/ADCY2/ATP2A2/PPP1CB/CAMK2A/ATP2B4/ACTC1/CACNA1C/CACNB2/ATP1B3/GNAI3/ADCY1/PPP2CA/PPP2R5C/RPS6KA5/MAPK14/PPP1CC/ATP2B1/CALM2/RAPGEF4/CALM1/PRKACB/CREB5/AKT3/BCL2/CACNA2D1/PRKCA/SLC8A1/PPP2CB/ATP1B1/PPP2R2A/CAMK2D/CREB3L1/PPP2R2D/CAMK2G	37
gga04530	Tight junction	37/715	156/4937	0.0012303	0.00767472	0.00610524	RUNX1/TJP1/PRKCE/RAP2C/ROCK1/PRKAG2/PRKAA2/NEDD4L/CDC42/MYH9/DLG2/PPP2CA/RAB8B/CLDN8/RAPGEF2/PARD6B/MYH10/ROCK2/PRKACB/RDX/CCND1/RAPGEF6/RAP1A/TIAM1/ARHGAP17/ACTG1/MAP3K1/ACTR2/PARD6G/PPP2CB/NEDD4/AMOTL1/AMOTL2/MAP3K5/PPP2R2A/PPP2R2D/RAC1	37
gga04910	Insulin signaling pathway	35/715	121/4937	2.53e-05	0.000221381	0.000176108	SOS2/PRKAG2/SOS1/PPARGC1A/PPP1CB/PRKAA2/FLOT2/TSC1/IRS2/PRKAR1A/PRKAR2B/PIK3R3/PIK3R1/SOCS1/RHOQ/CRKL/PDE3B/PPP1CC/GRB2/FOXO1/PDPK1/CALM2/CALM1/PRKACB/PRKAR2A/AKT3/MAP2K1/INSR/EIF4E/RAF1/SOCS3/KRAS/SHC4/PPP1R3B/CRK	35
gga04140	Autophagy - animal	34/715	127/4937	0.000180686	0.00147937	0.00117684	IGF1R/ITPR1/PTEN/RAB39B/WIPI2/PRKAA2/TSC1/IRS2/HIF1A/PIK3R3/PIK3R1/MTMR3/ZFYVE1/PPP2CA/HMGB1/ULK1/NRBF2/PDPK1/ULK2/PRKACB/RRAGD/AKT3/BCL2/MTMR4/RRAGA/MAP2K1/MAP3K7/RAF1/KRAS/PPP2CB/LAMP1/AMBRA1/RAB33B/RB1CC1	34
gga04916	Melanogenesis	26/715	91/4937	0.000342403	0.00263852	0.00209894	FZD4/MITF/KIT/ADCY2/FZD10/CAMK2A/GNAI3/ADCY1/FZD8/FZD5/KITLG/CALM2/CALM1/FZD6/PRKACB/EDN1/MAP2K1/RAF1/WNT7B/KRAS/PRKCA/FZD7/CTNNB1/CAMK2D/CREB3L1/CAMK2G	26
gga04520	Adherens junction	25/715	72/4937	1.23e-05	0.000124312	9.89e-05	IGF1R/MET/TJP1/NLK/SSX2IP/WASL/PTPRM/PTPRJ/CDC42/VCL/SNAI1/YES1/TGFBR1/LMO7/FGFR1/INSR/MAP3K7/BAIAP2/ACTG1/CTNNB1/CTNNA1/WASF2/TGFBR2/WASF1/RAC1	25
gga04540	Gap junction	24/715	84/4937	0.000573433	0.00375598	0.00298789	TJP1/ADRB1/PDGFRA/GJA1/ITPR1/SOS2/SOS1/ADCY2/GNAI3/PDGFA/ADCY1/GRB2/PRKACB/PRKG1/MAP2K1/RAF1/KRAS/PRKCA/PDGFRB/PDGFC/MAP3K2/GUCY1A3/DRD1/GUCY1A2	24
gga04912	GnRH signaling pathway	24/715	84/4937	0.000573433	0.00375598	0.00298789	MAP3K4/ITPR1/SOS2/SOS1/ADCY2/MAP2K4/CAMK2A/CDC42/CACNA1C/ADCY1/MAPK14/GRB2/CALM2/CALM1/PRKACB/MAP2K1/RAF1/KRAS/MAP3K1/PRKCA/MAP3K3/MAP3K2/CAMK2D/CAMK2G	24
gga04933	AGE-RAGE signaling pathway in diabetic complications	24/715	90/4937	0.00166403	0.00990852	0.00788223	COL4A5/FN1/PRKCE/VEGFA/COL4A1/NOX4/CDC42/PIK3R3/CDKN1B/PIK3R1/VEGFC/MAPK14/FOXO1/NFATC1/TGFBR1/EDN1/CCND1/AKT3/BCL2/PIM1/KRAS/PRKCA/TGFBR2/RAC1	24
gga04012	ErbB signaling pathway	23/715	78/4937	0.000453586	0.0033011	0.00262602	ERBB4/PAK2/SOS2/SOS1/MAP2K4/CAMK2A/ABL2/PIK3R3/CDKN1B/PIK3R1/CRKL/GRB2/AKT3/MAP2K1/RAF1/KRAS/PRKCA/SHC4/CRK/GAB1/ABL1/CAMK2D/CAMK2G	23
gga04340	Hedgehog signaling pathway	19/715	43/4937	2.34e-06	3.04e-05	2.42e-05	PTCH1/CSNK1G1/CUL3/FBXW11/LRP2/GLI2/GAS1/SMURF1/SMURF2/SPOPL/PRKACB/CCND1/CCND2/BCL2/BTRC/CDON/KIF3A/GLI3/CSNK1A1	19
