# Supplementary material for: Identification and expression pattern analysis of miRNAs in pectoral muscle during pigeon (Columba livia) development
Source: PeerJ. 2021 Jun 23;9:e11438. doi: 10.7717/peerj.11438 (PMC8234919; doi:10.7717/peerj.11438)
Supplement: Supplemental Information 11 [file peerj-09-11438-s011.xlsx]

## Sheet: Sheet1
								cli-miR-133a-3p
							1d	1.0126	0.9451	1.0423
							28d	11.011	10.4666	5.61225
							2y	27.2864	29.7161	17.4144
								cli-miR-181a-5p
							1d	1.54951	0.547496	0.902993
							28d	0.801796	0.869919	0.680995
							2y	0.252128	0.492217	0.312762
								cli-miR-187-3p
							1d	0.807057	0.955887	1.23706
							28d	2.35427	1.31258	1.60004
							2y	31.9903	22.3887	13.8237
									cli-miR-199-5p
							1d	1.25314	0.822986	0.923879
							28d	1.03112	1.10477	0.638195
							2y	0.348289	0.937939	0.290246
									cli-miR-1a-3p
							1d	1.63314	0.944885	0.421974
							28d	67.3772	36.8105	14.3769
							2y	91.9736	61.3815	56.9251
									cli-miR-22-3p
							1d	0.615154	1.30854	1.07631
							28d	31.3186	21.4169	20.3664
							2y	75.6233	77.119	52.0489
