# Supplementary material for: Identification and expression pattern analysis of miRNAs in pectoral muscle during pigeon (Columba livia) development
Source: PeerJ. 2021 Jun 23;9:e11438. doi: 10.7717/peerj.11438 (PMC8234919; doi:10.7717/peerj.11438)
Supplement: Supplemental Information 12 [file peerj-09-11438-s012.xlsx]

## Sheet: Sheet1
		Group	Relative lucifarase activity
		KLF3_WT+miRNA Control	0.938722
			0.986033
			1.07525
		KLF3_WT+miR-20b mimics	0.766223
			0.827907
			0.912116
		KLF3_Mut+miRNA Control	0.921043
			0.997951
			1.08101
		KLF3_Mut+miR-20b mimics	0.931094
			0.947642
			1.00026
